# Supplementary material
Source: MDPI journal article supplement (https://www.mdpi.com/2071-1050/13/16/9227)
Supplement: s1 [file s1]

Archive with 9 entries (9 files):
- Supplements/Supplements 2.xlsx
- Supplements/Supplements 3.xls
- Supplements/Supplements 3.xlsx
- Supplements/Supplements 3_1.xls
- Supplements/Supplements 4.xlsx
- Supplements/Supplements 5.xls
- Supplements/Supplements 7 raw data_PES.xlsx
- Supplements/Supplements 1.pdf
- Supplements/Supplements 6.pdf
