# Supplementary material
Source: MDPI journal article supplement (https://www.mdpi.com/2071-1050/13/16/9227)
Supplement: s1 [file s1 › Supplements/Supplements 2.xlsx]

## Sheet: Info
Adresse	Rekstadvegen 75, 7357 Skaun			63,254_10,070
Drift	Melkeproduksjon, økologisk, 541 tonn - 74 årskyr, ca 180 dyr. Spredt kalving
Fjøs	Kaldfjøs, 2009
Gjødselhåndtering inne	Skraper, Mellomlager på 220 m3. Pumpes vha. traktor over i gjødsellager hver 3.uke
Gjødselhåndtering ute	4000 m3. Lager 3400 m3, slangespredning,						Spres på 12 timer - 250 m3/time. 8 liter diesel/time + 1 døgn med røring
Bruk av fjøset, utmarksbeite	Ungdyr ute juni - september/oktober
	Melkekyr ute mai - september. Fores inne om natta
Tak og solressurs
Orientering	Sør
Vinkel	25 grader
Type tak	Diffusjonstak - slipper ut fukt og holder regn ute. Dvs. solceller må monteres med type toppfix-system med dobbelt sett med skinner ( i x og y-retning) for å opprettholde takets funksjon.
Bredde Fjøs	25.9	meter
Lengde Fjøs	60	meter
Horisont
El.infrasruktur og forbruk
El-infrastruktur	Trafo relativt ny. Plass til ett 125-A abonnement til. (Info fra Elektriker Solstad)
Hovedsikring og nett	125 A 3-fas, IT
Elektrisitetsforbruk pr år	100000	kWt
AMS-måler	Installert mars 2019
AMS-data	Eget excel-ark
Forbrukere fjøs	Min		Maks	Kommentarer						Info fra
Forblander	0	22	kW	1 - 2 timer pr. dag, Mindre bruk om sommeren. Ny innkjøpt. Samme effekt. Bruker halvparten av tida.						J.S
Skraper	0.55	0.55	kW	Går hver 30 min, dvs. en av skrapene går hvert 15.min. Gangtid 10 min.						J.S
Varmelamper kalv	0	3	kW	12-15 lamper a 250 W, dvs av og til > 3kW. 200 døgn pr år?						J.S
Varmekolbe drikkevann	0	3	kW	90 døgn pr år						J.S
Varmegjenvinning på drikkevann				Landteknikk (skala)						Martin Sæterbø, Skala
Melkerobot	2	7	kW	Oppgradert Lely A3		Maks 7 kW, 3,5 kW 3 ganger i døgnet 45 min hver gang				Gøran Kirkholt, Fjøssystemer
Melketank	2	11		Landteknikk (skala) 60 AL 2009, R-134 kuldemedium, maks 27 A Max						Martin Sæterbø, Skala
Lys	0	2.5		10 armaturer a 250 W. I snitt på 14 timer pr døgn
Div (møterom m.m.)	0.5	2
	kW min	KW maks
	5.05	51.05	10.55
	NB. Timesverdier er snittverdier over timen ikke maks.verdi
Andre behov/tanker
El-bil	Nissan Leaf 30 kWh, nå men ønsker 70-100 kWh på sikt? Kan tenke seg at man lader denne ved fjøset. Sette inn 32 A - 3 fas.								Lading på kveldstid og på helg?
Batteribank?
Bruke el-motor forblander ved slangespredning?
Biogass/Biovarme er interessant. Nytt oppvekstsenter bygges 2 km unna (2020 - 2024). Mulig kunde

## Sheet: El.forbruk utstyr
	Utregning elektrisitetsbruk
	Melkerobot	Lely A3				Melketank			Forblander
		Uten vask	Med vask			11	kW
		2	7	Pr.dag		6	timer pr.dag		22	kW
		21.75	45	min					2 timer gangtid, 1 timer med ny forblander fra sommeren 2019
		43.5	15.75	kWh		24090	kWh/år		200	døgn?
			59.25	kWh/døgn					44	kWh/døgn
	2 roboter		118.5	kWh/døgn		Drikkevann			1320	Kwh/måned
			3555	kWh/måned		Varmekolbe			8800	kWh/år
			43252.5	kWh/år		3	kW
						90	døgn
	Gjødsel inne					72	kWh/døgn
						6480	kWh/90 døgn		Lys
	0.55	kW				Varmegjenvinning drikkevann			250	W
	15	min mellom hver gang							16	timer/dag
	10	min gangtid				Oppvarming			40	kWh/dag
	Dvs. skrapene går 10 av hvert 15 min					Varmelamper kalv
	16	Timer gangtid pr.dag				3	kW		14600	kWh/år
	8.8	kWh/døgn				200	døgn
	264	kWh/måned				72	kWh/døgn
	3212	KWh/år				2160	kWh/måned
						14400	kWh/200 døgn
	Totalt pr år	114834	80384.1
	Info til utregning
		Effekt min [kW]	Effekt maks [kW]	Energi [kWh]	Kommentar
	2 Lely A3 ombygd	0	7	43000	2 ganger uten vask, 7 ganger med vask
	Gjødselskrape	0	0.55		Gangtid 16 av 24 timer
	Varmelamper kalv	0	3	14500
	Varmekolbe drikkevann	0	3	?	Av og på
	Melketank	0	11	24000	6 timer pr.dag
	Forblander	0	22	9000
	Lys	0	0.25	14500	På det meste av tiden
	Div utstyr rom	0.5	2
	Totalt forbruk			ca. 100000

## Sheet: Utslipp
Anlegg							NB
60 kWp - anlegg inkl annen infrastruktur
Levetid			30		[år]
Produksjon pr år			49700		[kWh]
Produksjon totalt			1491000		[kWh]		Ikke korrigert for tap i ytelse i løpet av levetid
Forbruk pr.år			110000		[kWh]
Utslipp produksjon av solcelleanlegg			20		[ g CO2/kWh produsert for solceller produsert i 2019]			https://energiteknikk.net/2016/12/rene-solceller-i-2018
Produsert elektrisitet erstatter
Norsk produksjon			16.4		[g CO2/kWh]			https://www.nve.no/reguleringsmyndigheten-for-energi-rme-marked-og-monopol/varedeklarasjon/nasjonal-varedeklarasjon-2017/
Norsk miks (forbruk)			31.2		[g CO2/kWh]			Ref Østfoldforskning
Nordisk miks (forbruk)			128		[g CO2/kWh]			https://www.asplanviak.no/aktuelt/2016/02/03/nordisk-stroem-blir-renere/
Europeisk miks (forbruk)			396		[g CO2/kWh]			https://www.nve.no/energiforsyning/opprinnelsesgarantier/varedeklarasjon-for-stromleverandorer/
Utslipp besparelse
	Utslipp forbruk uten solcellestrøm [tonn]	Utslipp forbruk som ikke dekkes av solcellestrøm	Utslipp solcelleproduksjon [tonn]	Utslipp med solcellanlegg (totalt)	Besparelse ved å bruke solcellestrøm [tonn]	Besparelse 30 kWp
Utslipp norsk miks	3.432	1.88136	0.994	2.87536	0.55664	1.219
Utslipp nordisk miks	14.08	7.7184	0.994	8.7124	5.3676
Utslipp europeisk miks	43.56	23.8788	0.994	24.8728	18.6872
Kostnad for tiltak [kr/tonn]					53213.9
Utslipp batteri
Størrelse	20		[kWh]
Utslipp produksjon av batteri	150		[kg CO2-ekvivalenter/kWh batterikapasitet]					https://forskning.no/miljoteknologi-spor-en-forsker-samferdsel/spor-en-forsker-hvor-skitne-er-elbilens-batterier/305563
Utslipp produksjon av batteri, 20 kWh	3		[tonn]
Vurdering
Utslipp fra solcelleanlegg går ned, men fortsatt "skitne" solceller på markedet
I utgangspunktet ikke grunnlag for å bruke annet enn norsk miks, dvs. begrenset effekt av tiltak
Viktig å ha klart for seg at for et klassiks sørvendt anlegg så vil mestparten av produksjonen komme på tider av døgnet og tider av året da det er minst bruk for el..								https://www.elbil24.no/nyheter/bmw-gar-bort-fra-kongo-kobolt/70917971
Sagt på en annen måte så vil en produksjon som bidrar når "kullkraften setter inn" (morgen, ettermiddag/kveld, vinterstid) være av relativt større verdi
Utslipp for produksjon av batteri synkende og til å leve med
Bruk av kobolt og litium i batterier en vanskeligere sak.
Produksjon eller behov som sammenfaller med solinnstråling vil være å foretrekke. Det er vanskelig å se for seg hvordan energibruken blir på sikt, men el-traktorer eller mindre automatisert utstyr som går på strøm kan benytte seg av solel.
For kylling og gris er behovet for ventilasjon sammenfallende med solinnstråling og slik sett mer logisk knyttet til å investere i et solcelleanlegg. Elektriker Solstad som Skaun Økomjølk bruker driver med kylling og er kommet langt i prosessen med å vurdere solceller. Kan være en god referanse i prosjektet.
Sammenligning fly tur-retur London	https://www.dagsavisen.no/innenriks/sa-mye-forurenser-flyturene-dine-1.434165

## Sheet: Utslipp 2020
Anlegg							NB
60 kWp - anlegg inkl annen infrastruktur
Levetid			30		[år]
Produksjon pr år justert for at man nå får kjøpt 320 W panel til samme pris som 280 W panel for et par år tilbake			56800		[kWh]
Produksjon totalt			1704000		[kWh]		Ikke korrigert for tap i ytelse i løpet av levetid
Forbruk pr.år			110000		[kWh]
Utslipp produksjon av solcelleanlegg			20		[ g CO2/kWh produsert for solceller produsert i 2019]			https://energiteknikk.net/2016/12/rene-solceller-i-2018
Produsert elektrisitet erstatter
Norsk produksjon			16.4		[g CO2/kWh]			https://www.nve.no/reguleringsmyndigheten-for-energi-rme-marked-og-monopol/varedeklarasjon/nasjonal-varedeklarasjon-2017/
Norsk miks (forbruk)			31.2		[g CO2/kWh]			Ref Østfoldforskning
Nordisk miks (forbruk)			128		[g CO2/kWh]			https://www.asplanviak.no/aktuelt/2016/02/03/nordisk-stroem-blir-renere/
Europeisk miks (forbruk)			396		[g CO2/kWh]			https://www.nve.no/energiforsyning/opprinnelsesgarantier/varedeklarasjon-for-stromleverandorer/
Utslipp besparelse
	Utslipp forbruk uten solcellestrøm [tonn]	Utslipp forbruk som ikke dekkes av solcellestrøm	Utslipp solcelleproduksjon [tonn]	Utslipp med solcellanlegg (totalt)	Besparelse ved å bruke solcellestrøm [tonn]	Besparelse 30 kWp
Utslipp norsk miks	3.432	1.65984	1.136	2.79584	0.63616	1.148
Utslipp nordisk miks	14.08	6.8096	1.136	7.9456	6.1344
Utslipp europeisk miks	43.56	21.0672	1.136	22.2032	21.3568
Kostnad for tiltak [kr/tonn]					46562.1
Utslipp batteri
Størrelse	20		[kWh]
Utslipp produksjon av batteri	150		[kg CO2-ekvivalenter/kWh batterikapasitet]					https://forskning.no/miljoteknologi-spor-en-forsker-samferdsel/spor-en-forsker-hvor-skitne-er-elbilens-batterier/305563
Utslipp produksjon av batteri, 20 kWh	3		[tonn]
Vurdering
Utslipp fra solcelleanlegg går ned, men fortsatt "skitne" solceller på markedet
I utgangspunktet ikke grunnlag for å bruke annet enn norsk miks, dvs. begrenset effekt av tiltak
Viktig å ha klart for seg at for et klassiks sørvendt anlegg så vil mestparten av produksjonen komme på tider av døgnet og tider av året da det er minst bruk for el..								https://www.elbil24.no/nyheter/bmw-gar-bort-fra-kongo-kobolt/70917971
Sagt på en annen måte så vil en produksjon som bidrar når "kullkraften setter inn" (morgen, ettermiddag/kveld, vinterstid) være av relativt større verdi
Utslipp for produksjon av batteri synkende og til å leve med
Bruk av kobolt og litium i batterier en vanskeligere sak.
Produksjon eller behov som sammenfaller med solinnstråling vil være å foretrekke. Det er vanskelig å se for seg hvordan energibruken blir på sikt, men el-traktorer eller mindre automatisert utstyr som går på strøm kan benytte seg av solel.
For kylling og gris er behovet for ventilasjon sammenfallende med solinnstråling og slik sett mer logisk knyttet til å investere i et solcelleanlegg. Elektriker Solstad som Skaun Økomjølk bruker driver med kylling og er kommet langt i prosessen med å vurdere solceller. Kan være en god referanse i prosjektet.
Sammenligning fly tur-retur London	https://www.dagsavisen.no/innenriks/sa-mye-forurenser-flyturene-dine-1.434165

## Sheet: Pris solceller
	Referanse	Muligheter og utfordringer knyttet til fornybar energiproduksjon på norske gårdsbruk
		inkl.	Enova. (08.05.2017) Kostnadsrapport. Hentet fra: https://www.enova.no/download?objectPath=upload_images/9EF9602A2B454C008F472DF2A98F6737.pdf
	Justering for prisutvikling siden 2017
							55 kWp	60 kWp	30 kWp
	Modul						288	314.182	157.091
	Vekslretter (Inverter)						76.3	83.2364	41.6182
	Mekanisk monteringsutstyr (stativ, skinnesystem, forankring jord/tak etc)						115.5	126	63
	Elektrisk monteringsutstyr (DC-kabler, sikringer, brytere, jording etc.)						27.5	30	15
	Driftsovervåkingsutstyr (sensorer, monitoreringsløsning, display etc)						22	24	12
								0	0
	Mekaniks installasjonsarbeid						170.5	279	139.5
	Elektrisk installasjonsarbeid (Likestrøm-/DC-side)						33	36	18
	Elektrisk installasjonsarbeid (Velkselstrøm-/AC-side)						27.5	30	15
								0	0
	Maskin/utstyr/verkstøy (stillas-/liftleie, personsikringsutstyr, spesialverktøy etc)						66	72	36
	Div						0	0	0
									0
								994.418	497.209

## Sheet: Lønnsomhet solceller 60 kWp
							Grunnlagsdata for beregning av lønnsomhet på biovarmeanlegg
																			Nåverdier for å finne inntjeningstid
						År	Investering	Energi produksjon	"Inntekt" el. til egen bruk	Solgt el.	Tilskudd fra Innovasjon Norge	Sum inntekter inkl tilskudd	Drifts- og vedlikeholdskostnader	Kontantstrøm med tilskudd fra IN	Kontantstrøm uten tilskudd fra IN				Med støtte	Uten støtte	År
		Innverdier					i kr	i kWh/år	i kr	i kr	i kr	i kr	i kr	i kr	i kr				-999999999	-999999999	0	" dummy startverdi
		Søkt støtte fra Innovasjon Norge	0	kr		1	994000	49700	25347	11928	0	37275		-956725	-956725				-902571	-902571	1
		Verdi el til egen bruk	85	øre/kWh		2	0	49700	25347	11928	0	37275		37275	37275				-869396	-869396	2
		Pris salg av el.	40	øre/kWh		3	0	49700	25347	11928	0	37275		37275	37275				-838099	-838099	3
		Prosjektets levetid	30	år		4	0	49700	25347	11928	0	37275		37275	37275				-808574	-808574	4
		Startår (bruk 1 eller årstall)	1			5	0	49700	25347	11928	0	37275		37275	37275				-780720	-780720	5
						6	0	49700	25347	11928	0	37275		37275	37275				-754443	-754443	6
						7	0	49700	25347	11928	0	37275		37275	37275				-729653	-729653	7
						8	0	49700	25347	11928	0	37275		37275	37275				-706266	-706266	8
						9	0	49700	25347	11928	0	37275		37275	37275				-684203	-684203	9
						10	83000	49700	25347	11928	0	37275		-45725	-45725				-709735	-709735	10
		Utverdier:				11	0	49700	25347	11928	0	37275		37275	37275				-690099	-690099	11
		Nåverdi med støtte	-496878	kr		12	0	49700	25347	11928	0	37275		37275	37275				-671575	-671575	12
		Nåverdi uten støtte	-496878	kr		13	0	49700	25347	11928	0	37275		37275	37275				-654099	-654099	13
						14	0	49700	25347	11928	0	37275		37275	37275				-637612	-637612	14
		Internrente med støtte	-0.291298	%		15	0	49700	25347	11928	0	37275		37275	37275				-622059	-622059	15
		Internrente uten støtte	-0.291298	%		16	0	49700	25347	11928	0	37275		37275	37275				-607385	-607385	16
						17	0	49700	25347	11928	0	37275		37275	37275				-593543	-593543	17
		Inntjeningstid med støtte	99	år		18	0	49700	25347	11928	0	37275		37275	37275				-580484	-580484	18
		Inntjeningstid uten støtte	99	år		19	0	49700	25347	11928	0	37275		37275	37275				-568164	-568164	19
						20	83000	49700	25347	11928	0	37275		-45725	-45725				-582421	-582421	20
		kWh per støttekrone	#DIV/0!	kWh/kr		21	0	49700	25347	11928	0	37275		37275	37275				-571456	-571456	21
						22	0	49700	25347	11928	0	37275		37275	37275				-561112	-561112	22
		Middel kWh / levetid	49700			23	0	49700	25347	11928	0	37275		37275	37275				-551354	-551354	23
						24	0	49700	25347	11928	0	37275		37275	37275				-542148	-542148	24
						25	0	49700	25347	11928	0	37275		37275	37275				-533463	-533463	25
						26	0	49700	25347	11928	0	37275	0	37275	37275				-525269	-525269	26
		Sumtall for kolonnene				27	0	49700	25347	11928	0	37275	0	37275	37275				-517540	-517540	27
		Investering	1160000			28	0	49700	25347	11928	0	37275	0	37275	37275				-510248	-510248	28
		Energi produksjon	1491000			29	0	49700	25347	11928	0	37275	0	37275	37275				-503368	-503368	29
		"Inntekt" el. til egen bruk	760410			30	0	49700	25347	11928	0	37275	0	37275	37275				-496878	-496878	30
		Solgt el.	357840			31	0	0	0		0	0	0	0	0				-496878	-496878	31
		Tilskudd fra Innovasjon Norge	0			32	0	0	0		0	0	0	0	0				-496878	-496878	32
		Sum inntekter inkl tilskudd	1118250			33	0	0	0		0	0	0	0	0				-496878	-496878	33
		Drifts- og vedlikeholdskostnader	0			34	0	0	0		0	0	0	0	0				-496878	-496878	34
		Kontantstrøm med tilskudd fra IN	-41750			35	0	0	0		0	0	0	0	0				-496878	-496878	35
		Kontantstrøm uten tilskudd fra IN	-41750			36	0	0	0		0	0	0	0	0				-496878	-496878	36
						37	0	0	0		0	0	0	0	0				-496878	-496878	37
						38	0	0	0		0	0	0	0	0				-496878	-496878	38
						39	0	0	0		0	0	0	0	0				-496878	-496878	39
						40	0	0	0		0	0	0	0	0				-496878	-496878	40
						41	0	0	0		0	0	0	0	0				-496878	-496878	41
						42	0	0	0		0	0	0	0	0				-496878	-496878	42
						43	0	0	0		0	0	0	0	0				-496878	-496878	43
						44	0	0	0		0	0	0	0	0				-496878	-496878	44
						45	0	0	0		0	0	0	0	0				-496878	-496878	45
						46	0	0	0		0	0	0	0	0				-496878	-496878	46
						47	0	0	0		0	0	0	0	0				-496878	-496878	47
						48	0	0	0		0	0	0	0	0				-496878	-496878	48
						49	0	0	0		0	0	0	0	0				-496878	-496878	49
						50	0	0	0		0	0	0	0	0				-496878	-496878	50
						51	0	'			0	0	0	0	0				-496878	-496878	98	" dummy sluttår
																			9999	9999	99
		Referanser
		https://www.tu.no/artikler/sa-lang-tid-tar-det-for-et-solcellepanel-tjener-inn-seg-selv/346288

## Sheet: Lønnsomhet solceller 30 kWp
							Grunnlagsdata for beregning av lønnsomhet på biovarmeanlegg
																			Nåverdier for å finne inntjeningstid
						År	Investering	Energi produksjon	"Inntekt" el. til egen bruk	Solgt el.	Tilskudd fra Innovasjon Norge	Sum inntekter inkl tilskudd	Drifts- og vedlikeholdskostnader	Kontantstrøm med tilskudd fra IN	Kontantstrøm uten tilskudd fra IN				Med støtte	Uten støtte	År
		Innverdier					i kr	i kWh/år	i kr	i kr	i kr	i kr	i kr	i kr	i kr				-999999999	-999999999	0	" dummy startverdi
		Søkt støtte fra Innovasjon Norge	0	kr		1	500000	24850	16898	1988	0	18886		-481114	-481114				-453881	-453881	1
		Verdi el til egen bruk	85	øre/kWh		2	0	24850	16898	1988	0	18886		18886	18886				-437073	-437073	2
		Pris salg av el.	40	øre/kWh		3	0	24850	16898	1988	0	18886		18886	18886				-421216	-421216	3
		Prosjektets levetid	30	år		4	0	24850	16898	1988	0	18886		18886	18886				-406256	-406256	4
		Startår (bruk 1 eller årstall)	1			5	0	24850	16898	1988	0	18886		18886	18886				-392143	-392143	5
						6	0	24850	16898	1988	0	18886		18886	18886				-378830	-378830	6
						7	0	24850	16898	1988	0	18886		18886	18886				-366269	-366269	7
						8	0	24850	16898	1988	0	18886		18886	18886				-354420	-354420	8
						9	0	24850	16898	1988	0	18886		18886	18886				-343241	-343241	9
						10	41600	24850	16898	1988	0	18886		-22714	-22714				-355925	-355925	10
		Utverdier:				11	0	24850	16898	1988	0	18886		18886	18886				-345976	-345976	11
		Nåverdi med støtte	-247936	kr		12	0	24850	16898	1988	0	18886		18886	18886				-336590	-336590	12
		Nåverdi uten støtte	-247936	kr		13	0	24850	16898	1988	0	18886		18886	18886				-327736	-327736	13
						14	0	24850	16898	1988	0	18886		18886	18886				-319382	-319382	14
		Internrente med støtte	-0.229981	%		15	0	24850	16898	1988	0	18886		18886	18886				-311502	-311502	15
		Internrente uten støtte	-0.229981	%		16	0	24850	16898	1988	0	18886		18886	18886				-304067	-304067	16
						17	0	24850	16898	1988	0	18886		18886	18886				-297054	-297054	17
		Inntjeningstid med støtte	99	år		18	0	24850	16898	1988	0	18886		18886	18886				-290437	-290437	18
		Inntjeningstid uten støtte	99	år		19	0	24850	16898	1988	0	18886		18886	18886				-284195	-284195	19
						20	41600	24850	16898	1988	0	18886		-22714	-22714				-291277	-291277	20
		kWh per støttekrone	#DIV/0!	kWh/kr		21	0	24850	16898	1988	0	18886		18886	18886				-285722	-285722	21
						22	0	24850	16898	1988	0	18886		18886	18886				-280481	-280481	22
		Middel kWh / levetid				23	0	24850	16898	1988	0	18886		18886	18886				-275537	-275537	23
						24	0	24850	16898	1988	0	18886		18886	18886				-270872	-270872	24
						25	0	24850	16898	1988	0	18886		18886	18886				-266472	-266472	25
						26	0	24850	16898	1988	0	18886	0	18886	18886				-262321	-262321	26
		Sumtall for kolonnene				27	0	24850	16898	1988	0	18886	0	18886	18886				-258404	-258404	27
		Investering	583200			28	0	24850	16898	1988	0	18886	0	18886	18886				-254710	-254710	28
		Energi produksjon	745500			29	0	24850	16898	1988	0	18886	0	18886	18886				-251224	-251224	29
		"Inntekt" el. til egen bruk	506940			30	0	24850	16898	1988	0	18886	0	18886	18886				-247936	-247936	30
		Solgt el.	59640			31	0	0	0		0	0	0	0	0				-247936	-247936	31
		Tilskudd fra Innovasjon Norge	0			32	0	0	0		0	0	0	0	0				-247936	-247936	32
		Sum inntekter inkl tilskudd	566580			33	0	0	0		0	0	0	0	0				-247936	-247936	33
		Drifts- og vedlikeholdskostnader	0			34	0	0	0		0	0	0	0	0				-247936	-247936	34
		Kontantstrøm med tilskudd fra IN	-16620			35	0	0	0		0	0	0	0	0				-247936	-247936	35
		Kontantstrøm uten tilskudd fra IN	-16620			36	0	0	0		0	0	0	0	0				-247936	-247936	36
						37	0	0	0		0	0	0	0	0				-247936	-247936	37
						38	0	0	0		0	0	0	0	0				-247936	-247936	38
						39	0	0	0		0	0	0	0	0				-247936	-247936	39
						40	0	0	0		0	0	0	0	0				-247936	-247936	40
						41	0	0	0		0	0	0	0	0				-247936	-247936	41
						42	0	0	0		0	0	0	0	0				-247936	-247936	42
						43	0	0	0		0	0	0	0	0				-247936	-247936	43
						44	0	0	0		0	0	0	0	0				-247936	-247936	44
						45	0	0	0		0	0	0	0	0				-247936	-247936	45
						46	0	0	0		0	0	0	0	0				-247936	-247936	46
						47	0	0	0		0	0	0	0	0				-247936	-247936	47
						48	0	0	0		0	0	0	0	0				-247936	-247936	48
						49	0	0	0		0	0	0	0	0				-247936	-247936	49
						50	0	0	0		0	0	0	0	0				-247936	-247936	50
						51	0	'			0	0	0	0	0				-247936	-247936	98	" dummy sluttår
																			9999	9999	99
		Referanser
		https://www.tu.no/artikler/sa-lang-tid-tar-det-for-et-solcellepanel-tjener-inn-seg-selv/346288

## Sheet: Batteri
Flytte 20 kWh til egen fordel 200 dager i året
4000	kr/år i besparelse
200000	kr i investering
50	50 år tilbakebetaling
Effektutjevning ift. effektledd
Effektbruken ligger relativt høyt over tid, dvs batteriet vil ikke greie å ta ned "den høyeste timen". Hvis effekten vil avregnes ut fra minuttsverdier så vil maks.effekten nok kunne ligge høyere.
Ift. nettstøtte.
Utjevning av spenningsforskjeller. Må evt. undersøkes. Vanskelig å tallfeste besparelse og evt. verdi som Trønderenergi vil sette på en slik "tjeneste".

## Sheet: El.forbruk
Skaun Økomjølk Da - 2019	Skaun Økomjølk Da - 2019	Skaun Økomjølk Da - 2019	Skaun Økomjølk Da - 2019	Skaun Økomjølk Da - 2019	Skaun Økomjølk Da - 2019
Måned	Forbruk	Strøm	Strøm	Nettleie	Nettleie
	KWh	Kostnader (kr.)	Mva (kr.)	Kostnader (kr.)	Mva (kr.)		Snitt pr.dag	Snitt kW/time
januar	12677	7361.38	1840.35	5248.07	1312.02		408.935	17.039
februar	10188.3	5223.75	1305.94	4472.22	1118.06		363.869	15.1612
mars	11324.5	5283.88	1320.97	9438.18	2359.54		365.306	15.2211
april	9328.16	4405.91	1101.48	0	0		310.939	12.9558
mai	0	0	0	0	0			11	8184
juni	0	0	0	0	0			9	6480
juli	0	0	0	0	0			9	6696
august	0	0	0	0	0			9	6696
september	0	0	0	0	0			10	7200
oktober	0	0	0	0	0			11	8184
november	0	0	0	0	0			13	9360
desember	0	0	0	0	0			15	11160
Total	43518	22274.9	5568.73	19158.5	4789.62
									107478
