# Supplementary material
Source: MDPI journal article supplement (https://www.mdpi.com/2071-1050/13/16/9227)
Supplement: s1 [file s1 › Supplements/Supplements 3.xlsx]

## Sheet: Klimagassutslipp
		Kommentar	Utslipp lagring og spredning ubehandlet gjødsel			Norsk mix	Europeisk miks
				Input					Referanse
		Se på tall fra Rodhe og Hansen	Utslipp av CH4 fra gjødesllager	10.2	kg CH4/tonn TS	117.334		[tonn CO2 ekv]	Modahl et al, 2016.
			Utslipp av NO2 fra gjødsellager	0.123	kg NO2/tonn TS	12.3339		[tonn CO2 ekv]	Modahl et al, 2016.
			Utslipp av NH3 fra gjødsellager	1.37	kg NH3/tonn TS	0.518408		[tonn NH3]	Modahl et al, 2016.
			Utslipp av N2O i forbindelse med spredning av gjødsel	0.547	kg N2O/tonn TS	54.851		[tonn CO2 ekv]	Modahl et al, 2016.
			Utslipp av NH3 i forbindelse med spredning av gjødsel	5.39	kg NH3/tonn TS	2.03958		[tonn NH3]	Modahl et al, 2016.
			Utslipp lagring og spredning biorest
			Utslipp av CH4 fra biorest i lager	3.37	kg CH4/tonn TS	18.0263		[tonn CO2 ekv]	Modahl et al, 2016.
		Ta med tak?	Utslipp av N2O fra biorest i lager	0	[kg NO2/tonn TS]	NB! Andre regner ut fra utråtningsgrad. Dette er et gjennomsnittstall
			Utslipp av NH3 fra biorest i lager	1.92		0.337836		[tonn NH3]	Modahl et al, 2016.
			Utslipp fra biorest fra lager med tett tak	0
			Utslipp av N2O i forbindelse med spredning av biorest	0.468	[kg NO2/tonn TS]	21.8221		[tonn CO2 ekv]	Modahl et al, 2016. s.43
			Utslipp av NH3 fra biorest i lager	6.17	[kg NH3/tonn TS]	1.08565		[tonn NH3]	Modahl et al, 2016.
		Økologisk, bruker ikke	Erstatning av mineragjødsel						https://norsus.no/publikasjon/evaluering-av-pilotordning-for-tilskudd-til-husdyrgjodsel-til-biogassproduksjon/
			Utslipp forbundet med produksjon og bruk av mineralgjødsel	8.7	tonn CO2/kg N
			Kg N tilsatt hvis konvensjonell gård (sjekk opp, satt inn tall basert på annen beregning)	15
			Utslipp	130.5
			Redusert utslipp produksjon strøm og varme
			Norsk el-kraft med opprinnelsesgaranti (også fysisk levert strøm..)	32.1	[g CO2/kWt]	14.7339			https://www.epd-norge.no/getfile.php/1310666-1559908334/EPDer/Energi/NEPD-1685-676_Hydroelectricity-from-Trollheim-Power-Station.pdf			https://www.nve.no/energibruk-effektivisering-og-teknologier/energibruk/hvor-kommer-strommen-fra/
			Norsk el-kraft uten opprinnelsesgaranti (2019-tall)	396	[g CO2/kWt]	181.764			https://www.nve.no/energiforsyning/opprinnelsesgarantier/varedeklarasjon-for-stromleverandorer/
			Produksjon biogass anvendt	459000	[kWt]
			Utslipp eget forbruk uten biogass-anlegg - kjøpt fra nett	110000		3.531	43.56	[tonn CO2 ekv]
		Antatt at man bruker 3/5 av egen produksjon	Utslipp eget forbruk med biogass-anlegg - kjøpt fra nett	38533.4		1.23692	15.2592	[tonn CO2 ekv]
		Eksempel med nordisk miks
		Sjekk artikkel	Utslipp materialer biogass-anlegg og utslipp drift
			Utslipp forbundet med bygging av anlegget	50	[g CO2/kWt]				https://www.sciencedirect.com/science/article/abs/pii/S1364032116301885
			Utslipp bygging av anlegg			22.95		[tonn CO2 ekv]
		Antatt 1 % av produksjonen, 384 Nm3 CH4	Utslipp forbundet med drift av anlegget - slip			0		[tonn CO2 ekv]	Se Modahl et al, 2016. 1 % er nevnt
		Har allerede slangepsredning	Diesel transport og spredning gjødsel/biorest						Sissel Hansen
		Tradisjonell breispreder gir 15 ganger høyere utslipp	Dieselforbruk spredning	0.032	[Liter diesel/m3 gjødsel]
		Lystgassutslippene (C5 og C12) er også betydelig høyere ved	Tetthet diesel	0.84	[kg/liter]
		bruk av breispreder. Se egne beregninger Sissel	GHG utslipp per kg diesel	3.17	[kg CO2 ekv/kg Diesel]				https://www.miljodirektoratet.no/myndigheter/klimaarbeid/kutte-utslipp-av-klimagasser/klima-og-energiplanlegging/tabeller-for-omregning-fra-energivarer-til-kwh/
			Gjødselmengde uten biogass og uten tak	4000	[m3]
			Gjødselmengde med biogass og tak	3000	[m3]
			Mengde diesel uten biogass	128	[Liter
			Mengde diesel med biogass og tak	96	[Liter]
			Mengde diesel uten biogass	107.52	[kg]
			Mengde diesel med biogass og tak	80.64	[kg]
			Utslipp CO2 ekv uten biogass			0.340838		[tonn CO2 ekv]
			Utslipp CO2 med biogass			0.255629		[tonn CO2 ekv]
			Totale utslipp uten biogass			188.391	228.42	[tonn CO2 ekv]
			Totale utslipp med biogass			64.0353	78.0576	[tonn CO2 ekv]
		Pr år	Reduserte utslipp			124.356	150.362	[tonn CO2 ekv]	18403.6	kg CO2 ekv
			Kostnad pr tonn CO2			48.2487	39.9036	1000 kr/tonn CO2
			Hvis produksjonen hadde erstattet diesel til traktor eller andre kjøretøy
			Energi-innhold 1 liter diesel			9.8		kWh/liter diesel
			Grovt estimat liter diesel fra produksjonen(uten reduksjon pga tap i prosessen)			46829.4		liter diesel
			Reduserte utslipp ved å erstatte diesel			148.449		tonn CO2 ekv
			Input
			Gjødsel	4730	[m3]
			Tetthet gjødsel
			TS gjødsel	6.2	%
			Tonn TS gjødsel	378.4	[tonn TS]
			TS biorest	3.72	%
			Tonn TS biorest	175.956	[tonn TS]
			CH4 - CO2	30.4	[CO2 ekv/CH4 ekv]
			N2O-CO2	265	[CO2 ekv/N2O ekv]
			Slip 1 % av produksjonen	0	[Nm3 CH4]
			Tetthet Metan	0.7167	[kg/Nm3]
			Vekt metan	0	[kg CH4]
			Hvis gårdsanlegget hadde kunnet oppgradere gassen…
			Traktor
			Dieselforbruk	12	[liter/time]
			Antall timer bruk i året	2000	[driftstimer]
			Dieselforbruk pr traktor og år	24000	[liter/traktor]
			Andel biogass som erstatter diesel	0.871		Forskjellig virkningsgrad gass og diesel-motor. Se Modahl et al, tabell 5.13
			Gassbehov traktor	27554.5	[ Nm3 CH4]
			Sparte utslipp ved å erstatte diesel med bigoass	63.9072	[tonn CO2 ekv]
			12000	km
			0.5	liter diesel/mil
			6000	liter diesel
			5040	kg diesel
			15.9768	Tonn CO2
			Målinger gjort ved JTI/Lena Rodhe, 2008	2.7	% av MCF
			MCF	260	[Nm3/tonn TS]
			Utslipp	7.02	Nm3/tonn TS
			Utslipp Skaun	2656.37	Nm3
			Vekt CH4	1903.82	kg CH4
			CO2-ekvivalenter	57.8761	tonn CO2 ekvivalenter

## Sheet: Kraftvarme
NB! Når du evt. sletter innholdet i en celle for å endre/rette opp så sletter du automatisk	Biogasskalkyle	Verktøy utviklet av Lantbrukarnas Riksförbund (LRF) tilrettelagt for norske forhold av Norsk institutt for landbruksøkonomisk forskning (NILF) og senere av Norsk senter for økologisk landbruk (NORSØK).
formelen som ligger inne. Sett evt. inn formelen igjen.
		Skaun Økomjølk
Forklaring	Type substrat	Mix					kg VS
Input - gule felter							234.608	131.38
Output - oransje felter
Informasjon - blå felter
Merknader gir utfyllende informasjon og referanser	Energiberegning basert på substratmengder og teoretiske verdier for biogass-potensial
	Velg substrat fra nedtrekksmeny	Mengde, tonn/år	TS-innhold, %	Tonn tørrstoff (TS)	Nm3 CH4/tonn VS	VS av TS %	Virkningsgrad	Nm3 CH4 totalt	Rågass m3	Flyt m3/time	Fordeling	MWh totalt
	Bløtgjødsel, storfe	4730	0.062	293.26	213	0.8	0.94	46973.2	78288.7	8.93707	1	458.928			1 GWH = 0,1 million liter diesel
Gassemengder og totalt teoretisk energi-innhold i gassen	Bløtgjødsel, storfe		0.035	0	213	0.8	0.94	0	0	0	0	0			Dvs. produksjonen her uten tap vil gi 0,0376 million liter diesel
regnes ut her. Justering for tap ved anvendelse av gassen	Fiske-ensilasje		0.1	0	600	0.38525	0.9	0	0	0	0	0			eller
håndteres i arket kalt Inndata effekt og energi.	Bløtgjødsel, storfe							0	0	0	0	0			37600	liter diesel
(virkningsgrad kjel, motor m.m.)	…		0	0	0	0	0	0	0	0	0	0
	…		0	0	0	0	0	0	0	0	0	0			Antatt utråtningsgrad		40	%
	…		0	0	0	0	0	0	0	0	0	0			Rest		0.0372
FREMGANGSMÅTE	Sum	4730	0.062	293.26		0.8		46973.2	78288.7	8.93707		458.928			TS		3.72
Kraftvarme										5.36224
1. Få oversikt over substratmengder og legg inn disse		90.9615		Metaninnhold i biogassen	0.6
2. Om mulig analyser substratet og sett inn egne tall for TS	Sambehandlingseffekt?	90.9615
3. Tilsett vann slik at TS-innholdet inn i anlegget er lav nok (se celle B31)	Effekt av sambehandling (ingen effekt = 100 %)	1
4. Legg inn ønsket oppholdstid (B37)
5. Legg inn investeringskostnad og avskrivningstid	CH4 totalt med sambehandlingseffekt, Nm3 CH4	46973.2									m3/m3 gjødsel	m3 gjødsel	m3 rågass	m3/time
6. Legg inn drifts- og vedlikeholdskostnader											100	3000	300000	34.2466
Inndata effekt og Energi - Input her regner ut verdier for kraftvarme fra D74-D89	Energiutbytte med sambehandlingseffekt, MWh	458.928									120	3000	360000	41.0959
7. Legg inn driftstid på anlegget, elbehov og temperatur for substratet/prosessen
8. Legg inn virkningsgrad strøm, varme, evt. drivstoff og tap	Reaktoren, Hvor mye vann må tilsettes samt størrelse og belastning på reaktoren.
Kraftvarme
9. Legg inn gate-fee evt. kostnad for substrat man behandler evt. tar imot utenfra
10. Gå til fane Tilskudd gjødsel til biogass. Legg inn gjødselmengder og evt. TS	m³/år	m³/døgn
For eget anlegg bytt ut innholdet i F94 (kraftvarme) med G18 fra tilskudd-fanen.		0
11. Legg inn priser for kjøpt strøm, levert strøm, levert varme og/eller levert drivstoff
12. Legg inn kvartal for oppstart	Substrat, tonn inkludert vann	TS-innhold	tonn/dag	Min. volum, m³
13. Legg inn egenkapital	4730	0.062	12.9589	388.767
Resultatene foreligger både i Kraftvarme-arket og i rapport Kraftvarme-arket
Figur for tilbakebetalingstid ligger i Rap EK Kraftvarme	Opph.tid, døgn
	30		0
	Belastning, kg VS/m³ døgn
	1.65333
					Velg 5/10/15/20 år	Rentesats	Kapitalkostnad per år
	Investering	Kostnad	Inv.støtte	Rest til finansiering	Avskrivningstid	0.05	(tilnærmet annuitet)
	Biogass-anlegg	5500000	2750000	2750000	20	0.05	209688
	Tak på lager	500000	250000	250000	30	0.05	14791.7
			0	0	20	0.05	0
			0	0	30	0.05	0
			0	0	20	0.05	0
			0	0	20	0.05	0
			0	0	30	0.05	0
	Annet			0		0.05
	Sum	6000000	3000000	3000000	30		224479
	Andre kostnader	Enhet	Ant. Pr år	á-pris	Kostnad/år
	Personalkostnader	kr/ansatt
	Offentlige avgifter (tilsyn)	kr	1	20000	20000
	Forsikring	kr	1	7500	7500
		kr
		kr
	Transport gjødsel og biorest	kr/tonn
	Leie av lager	kr/år			0
		kr/tonn			0
		kr/tonn			0
	Behandling vanding fraksjon i rensenalegg	kr/tonn			0
	Sum				27500
	Drifts- og vedlikeholdskostnader	Enhet	Ant. per år	á-pris	Kostnad/år
	Biogassanleggg	kr	1	110000	110000
	Vann	kr/m3	0		0
	Annet	kr/kWh			0
	Sum drifts- og vedlikeholdskostnader				110000
	El- og oppvarmingskostnader	Enhet	Ant. per år	á-pris	Kostnad/år
Inputt/tall for D74 og D76 kommer fra Inndata effekt og energi	Elbehov biogassanlegg	kr/kWh	22946.4	0.9	20651.8
			0	0	0
	Varmebehov biogassanlegg	kr/kWh	173834		0
			0		0
	Sum el- og oppvarmingskostnader				20651.8
	Totalkostnad		kr/år		453985
	Totalkostnad		kr/Nm³ CH4		9.66477
	Totalkostnad		kr/kWh		0.989229
	Inntekter	Enhet	Mengde	á-pris	Inntekt/år
Input/tall for D85-D89 kommer fra Inndata effekt og energi	Salg av drivstoff	kr/liter	0		0
	Salg av el	kr/kWh	57562	0.4	23024.8
	Salg av el internt	kr/kWh	86343	0.9	77708.7
	Salg av el-sertifikat	kr/stk			0
	Salg av varme	kr/kWh	47146.1	0.9	42431.5
	Salg av fosfor	kr/tonn			0
	Salg av N-gjøsel	kr/tonn
	Verdiøkning biorest	kr/tonn		2.7	0
	Gate-fee	kr/tonn	0		0
	Tilskudd for levering av husdyrgjødsel til biogassanlegg	kr/tonn			182140
	Sum inntekter/besparelse				325305
	Resultat (med investeringsstøtte)				-128680
	Resultat på innsatt kapital %				-0.0428934
	Internrente (IRR)				0.0117021
	RESULTAT- OG BALANSEBEREGNING
Korrigering for tidspunkt for oppstart	I hvilket kvartal er driftsstart i år 1?	1		Egenkapital, kr	Lånt kapital, %
Egenkapital settes inn her				750000	0.75
	Driftsår nr.	1	2	3	4	5	6	7	8	9	10	11	12	13	14	15	16	17	18	19	20
	RESULTATBEREGNING	År 1	År 2	År 3	År 4	År 5	År 6	År 7	År 8	År 9	År 10	År 11	År 12	År 13	År 14	År 15	År 16	År 17	År 18	År 19	År 20
	Inntekter	325305	325305	325305	325305	325305	325305	325305	325305	325305	325305	325305	325305	325305	325305	325305	325305	325305	325305	325305	325305
	Driftsavhengige kostnader	-158152	-158152	-158152	-158152	-158152	-158152	-158152	-158152	-158152	-158152	-158152	-158152	-158152	-158152	-158152	-158152	-158152	-158152	-158152	-158152
	Avskrivninger	-145833	-145833	-145833	-145833	-145833	-145833	-145833	-145833	-145833	-145833	-145833	-145833	-145833	-145833	-145833	-145833	-145833	-145833	-145833	-145833
	Rentekostnader	-112500	-107344	-102188	-97031.2	-91875	-86718.8	-81562.5	-76406.2	-71250	-66093.8	-60937.5	-55781.2	-48489.6	-41197.9	-33906.2	-26614.6	-21458.3	-14166.7	-6875	416.667
	Årets resultat	-91180.1	-86023.9	-80867.6	-75711.4	-70555.1	-65398.9	-60242.6	-55086.4	-49930.1	-44773.9	-39617.6	-34461.4	-27169.7	-19878	-12586.4	-5294.68	-138.434	7153.23	14444.9	21736.6
	Inngående gjeld	2250000	2146875	2043750	1940625	1837500	1734375	1631250	1528125	1425000	1321875	1218750	1115625	969792	823958	678125	532292	429167	283333	137500	-8333.33
	Avdrag	-103125	-103125	-103125	-103125	-103125	-103125	-103125	-103125	-103125	-103125	-103125	-145833	-145833	-145833	-145833	-103125	-145833	-145833	-145833	-145833
	Utgående gjeld	2146875	2043750	1940625	1837500	1734375	1631250	1528125	1425000	1321875	1218750	1115625	969792	823958	678125	532292	429167	283333	137500	-8333.33	-154167
	Investeringsavkasting	-2.83285e+06	167153	167153	167153	167153	167153	167153	167153	167153	167153	167153	167153	167153	167153	167153	167153	167153	167153	167153	167153
	Akk. avkastning	-2.83285e+06	-2.66569e+06	-2.49854e+06	-2.33139e+06	-2.16423e+06	-1.99708e+06	-1.82993e+06	-1.66277e+06	-1.49562e+06	-1.32847e+06	-1.16131e+06	-994161	-827008	-659855	-492702	-325548	-158395	8758.18	175911	343065
	Internrente (IRR)	0.0117021
		#VALUE!
	Kassalikviditet	-48471.8	-43315.5	-38159.3	-33003	-27846.8	-22690.5	-17534.3	-12378	-7221.77	-2065.52	3090.73	8246.98	15538.6	22830.3	30122	37413.6	42569.9	49861.6	57153.2	64444.9
	Akkumulert	-48471.8	-91787.3	-129947	-162950	-190796	-213487	-231021	-243399	-250621	-252686	-249596	-241349	-225810	-202980	-172858	-135444	-92874.2	-43012.6	14140.6	78585.5
	Avskrivninger	År 1	År 2	År 3	År 4	År 5	År 6	År 7	År 8	År 9	År 10	År 11	År 12	År 13	År 14	År 15	År 16	År 17	År 18	År 19	År 20
	Biogass-anlegg	137500	137500	137500	137500	137500	137500	137500	137500	137500	137500	137500	137500	137500	137500	137500	137500	137500	137500	137500	137500
	Tak på lager	8333.33	8333.33	8333.33	8333.33	8333.33	8333.33	8333.33	8333.33	8333.33	8333.33	8333.33	8333.33	8333.33	8333.33	8333.33	8333.33	8333.33	8333.33	8333.33	8333.33
	0	0	0	0	0	0	0	0	0	0	0	0	0	0	0	0	0	0	0	0	0
	0	0	0	0	0	0	0	0	0	0	0	0	0	0	0	0	0	0	0	0	0
	0	0	0	0	0	0	0	0	0	0	0	0	0	0	0	0	0	0	0	0	0
	0	0	0	0	0	0	0	0	0	0	0	0	0	0	0	0	0	0	0	0	0
	0	0	0	0	0	0	0	0	0	0	0	0	0	0	0	0	0	0	0	0	0
	Annet	0	0	0	0	0	0	0	0	0	0	0	0	0	0	0	0	0	0	0	0
	Sum avskrivninger	145833	145833	145833	145833	145833	145833	145833	145833	145833	145833	145833	145833	145833	145833	145833	145833	145833	145833	145833	145833
	Avdrag	År 1	År 2	År 3	År 4	År 5	År 6	År 7	År 8	År 9	År 10	År 11	År 12	År 13	År 14	År 15	År 16	År 17	År 18	År 19	År 20
	Biogass-anlegg	103125	103125	103125	103125	103125	103125	103125	103125	103125	103125	103125	103125	103125	103125	103125	103125	103125	103125	103125	103125	2062500
	Tak på lager	0	0	0	0	0	0	0	0	0	0	0	0	0	0	0	0	0	0	0	0
	0	0	0	0	0	0	0	0	0	0	0	0	0	0	0	0	0	0	0	0	0
	0	0	0	0	0	0	0	0	0	0	0	0	0	0	0	0	0	0	0	0	0
	0	0	0	0	0	0	0	0	0	0	0	0	0	0	0	0	0	0	0	0	0
	0	0	0	0	0	0	0	0	0	0	0	0	0	0	0	0	0	0	0	0	0
	0	0	0	0	0	0	0	0	0	0	0	0	0	0	0	0	0	0	0	0	0
	Annet	0	0	0	0	0	0	0	0	0	0	0	0	0	0	0	0	0	0	0	0
	Sum avdrag	103125	103125	103125	103125	103125	103125	103125	103125	103125	103125	103125	103125	103125	103125	103125	103125	103125	103125	103125	103125
	Investeringer	År 1	År 2	År 3	År 4	År 5	År 6	År 7	År 8	År 9	År 10	År 11	År 12	År 13	År 14	År 15	År 16	År 17	År 18	År 19	År 20
	Biogass-anlegg	2750000	0	0	0	0	FALSE	0	0	0	0	FALSE	0	0	0	0	FALSE	0	0	0	0	2750000
	Tak på lager	250000	0	0	0	0	FALSE	0	0	0	0	FALSE	0	0	0	0	FALSE	0	0	0	0
	0	0	0	0	0	0	FALSE	0	0	0	0	FALSE	0	0	0	0	FALSE	0	0	0	0
	0	0	0	0	0	0	FALSE	0	0	0	0	FALSE	0	0	0	0	FALSE	0	0	0	0
	0	0	0	0	0	0	FALSE	0	0	0	0	FALSE	0	0	0	0	FALSE	0	0	0	0
	0	0	0	0	0	0	FALSE	0	0	0	0	FALSE	0	0	0	0	FALSE	0	0	0	0
	0	0	0	0	0	0	FALSE	0	0	0	0	FALSE	0	0	0	0	FALSE	0	0	0	0
	Annet	0	0	0	0	0	FALSE	0	0	0	0	0	0	0	0	0	FALSE	0	0	0	0
	Sum investeringer	3000000	0	0	0	0	0	0	0	0	0	0	0	0	0	0	0	0	0	0	0
																						0

## Sheet: Inndata effekt og energi
Effekt- og energiberegninger
Biogassanlegg													Kraftvarme
Produsert energi (biogass)										MWh			458.928
Energiinnhold i oppgradert gass										kWh/Nm³			9.77
Prod. mengde metan										Nm³			46973.2			Produsert energi (biogass) / Energiinnhold i oppgradert gass
Driftstid biogassanlegg										timer/år (full effekt)			8500			8760 timer ved full drift hele året
Pbiogas (Effekt biogas)										kWbiogas			53.9916			Produsert energi (biogass) / Driftstid på anlegget
Elbehov (pumper, ventiler mm)										%			0.05			Prosent av prod. Energi.			Dobbeltsjekker Deublien og Steinhauser eller IBBK ref
Elbehov (pumper, ventiler mm)										kWh/år			22946.4			Elbehov (pumper, ventiler mm) [%] * Prod.energi
Temp reaktor										oC			37
Temperatur gjødsel/substrat										oC			7
Temp.økn. ved mesofil alt.termofil										oC			30			oC økning av grader minus middeltemperatur på substratet
Varmebehov (oppvarm. substrat)										kWh/ton,oC o år			1.10721
Varmebehov (oppvarm. substrat)										kWh/år			157114			Varmebehov for oppvarming av substratet til reaktor-temperatur
Varmetap (reaktoren)										kWh/år			16719.9			Varmetapet er basert på en reaktor på minst 205 m3 og 30 cm isolering
Totalt varmebehov										kWh/år			173834
Varmebehov, andel av prod energi										%			0.378782
Anlegg
Drisvstoffvirkningsgrad										%			0
Elvirkningsgrad										%			0.35
Varmevirkningsgrad										%			0.55
Tap										%			0.1
Drivstoff, mengde										Liter
Pel, Effekt el										kWel			18.897			Pbiogass (Effekt biogass for kraft.anl.) • Elvirkningsgrad
Eel, Elenergi										MWh/år			160.625			Pel (Effekt el fra kraft.anl.) • Driftstid gassmotor
Pvarme, Effekt varme										kWvärme			29.6954			Pvarme (Effekt varme fra kraft.anl.) • (1 - Elvirkningsgrad)
Evarme, Varmeenergi										MWh/år			252.411			Pvarme (Effekt varme fra kraft.anl.) • Driftstid gassmotor
Mengder for salg
Drivstoff for salg										Liter			0
El for salg										kWh/år			143905			Eel (El-energi fra kraft.anl.) - Elbehov biogasanl. - Elbehov oppgrad.anl.
Varme for salg										kWh/år			78576.9			Evarme (Varmeenergi fra kraft.anl.) - Varmebehov biogasanl.
Elsertifikat
Antall elsertifikat										stk/år			160			Eel (El-energi fra anlegget). Hver produsert MWh gir ett elsertifikat
Kvotepliktig forbrukt el										kWh/år			22946.4			Elbehov biogasanl.		Enhver som bruker elektrisk energi som er egenprodusert er kvotepliktig
Kvoteplikt										stk sert./forb MWh			0.088			Elsertifikatkvoten endres fra år til år. Se https://lovdata.no/dokument/NL/lov/2011-06-24-39/KAPITTEL_4#%C2%A717
Antall elsertifikat eget forbruk										stk			2			Kvotepliktig forbrukt el • Kvoteplikt
Antall elsertifikat for salg										stk			158			Antall elsertifikat for prod. el - Antall elsertifikat for salg
Energiflyt
Produsert energi (biogass)										MWh/år			458.928
Varmebehov										MWh/år			173.834
Drivstoff for salg										Liter/år			0
El for salg										MWh/år			143.905
Varme for salg										MWh/år			78.5769
Tap i gassmotor/gasskjel									0.1	MWh/år			45.8928

## Sheet: Rapport Kraftvarme
Biogassberegning
			Antall tonn substrat		Type substrat	Beregningen er et eksempel, gassproduksjonen målt som normalkubikkmeter metan.
Skaun Økomjølk			4730		Mix
GASSPRODUKSJON
Substrat mengde (tonn)	TS-innhold, %			CH4 tot	MWh totalt
4730	0.062			46973.2	458.928
Temp C	tonn/dag		Opph.tid, døgn	Min. volum, m³	Belastning, kg VS/m³ døgn
37	12.9589		30	388.767	1.65333
Bløtgjødsel, storfe	4730	tonn					Energiflyt, MWh
							Varmebehov	173.834
						459 MWh	El for salg	143.905
							Varmesalg	78.5769
							Tap i motor	45.8928
ØKONOMI
Investering	Kostnad		Inv.støtte	Rest til finans.	År avskrivn.	Rente	Kostnad/år
Biogass-anlegg	5500000		2750000	2750000	20	0.05	209688
Tak på lager	500000		250000	250000	30	0.05	14791.7
0	0		0	0	20	0.05	0
0	0		0	0	30	0.05	0
0	0		0	0	20	0.05	0
0	0		0	0	20	0.05	0
0	0		0	0	30	0.05	0
Annet	0		0	0	0	0.05	0
Sum	6000000		3000000	3000000			224479
Drift, personalkostnader m.m.				Enhet	Ant. Pr år	á-pris	Kostnad/år
Personalkostnader				kr/ansatt	0	0	0
Offentlige avgifter (tilsyn)				kr	1	20000	0
Biogassanleggg				kr	1	110000	110000
Forsikring				kr	1	7500	7500
Vann				kr/m3	0	0	0
Annet	Effekt	18.897	kW	kr/kWh	0	0	0
0				kr/tonn	0	0	0
											376000
Sum							117500
El- og oppvarmingskostnader
Elbehov biogassanlegg				kr/kWh	22946.4	0.9	20651.8
Varmebehov biogassanlegg				kr/kWh	173834	0	0
Sum							20651.8
Totalkostnad kr/år							453985
Totalkostnad kr/Nm³ CH4							9.66477
Totalkostnad kr/kWh							0.989229
Inntekter				Enhet	Mengde	á-pris	Inntekt/år
Salg av el				kr/kWh	57562	0.4	23024.8
Salg av el internt				kr/kWh	86343	0.9	77708.7
Salg av el-sertifikat				kr/stk	0	0	0
Salg av varme				kr/kWh	47146.1	0.9	42431.5
Salg av fosfor				kr/tonn	0	0	0
Salg av N-gjøsel				kr/tonn	0	0	0
Verdiøkning biorest				kr/tonn	0	2.7	0
Tilskudd for levering av husdyrgjødsel til biogassanlegg				kr/tonn	0	0	182140
Sum							325305
Resultat (med investeringsstøtte)							-128680
Resultat på innsatt kapital %							-0.0428934

## Sheet: Rap EK Kraftvarme
20-årsberegning		Skaun Økomjølk
		Mix
Kalkyle	År 1	År 2	År 3	År 4	År 5	År 6	År 7	År 8	År 9	År 10
Inntekter	325305	325305	325305	325305	325305	325305	325305	325305	325305	325305
Driftsavhengige kostnader	-158152	-158152	-158152	-158152	-158152	-158152	-158152	-158152	-158152	-158152
Avskrivninger	-145833	-145833	-145833	-145833	-145833	-145833	-145833	-145833	-145833	-145833
Rentekostnader	-112500	-107344	-102188	-97031.2	-91875	-86718.8	-81562.5	-76406.2	-71250	-66093.8
Resultat	-91180.1	-86023.9	-80867.6	-75711.4	-70555.1	-65398.9	-60242.6	-55086.4	-49930.1	-44773.9
Inngående gjeld	2250000	2146875	2043750	1940625	1837500	1734375	1631250	1528125	1425000	1321875
Avdrag	-103125	-103125	-103125	-103125	-103125	-103125	-103125	-103125	-103125	-103125
Utgående gjeld	2146875	2043750	1940625	1837500	1734375	1631250	1528125	1425000	1321875	1218750
Investeringsavkasting	-2.83285e+06	167153	167153	167153	167153	167153	167153	167153	167153	167153
Akk. avkastning	-2.83285e+06	-2.66569e+06	-2.49854e+06	-2.33139e+06	-2.16423e+06	-1.99708e+06	-1.82993e+06	-1.66277e+06	-1.49562e+06	-1.32847e+06
Internrente (IRR)	0.0117021
Kassalikviditet	-48471.8	-43315.5	-38159.3	-33003	-27846.8	-22690.5	-17534.3	-12378	-7221.77	-2065.52
Akkumulert	-48471.8	-91787.3	-129947	-162950	-190796	-213487	-231021	-243399	-250621	-252686
Kalkyle	År 11	År 12	År 13	År 14	År 15	År 16	År 17	År 18	År 19	År 20
Inntekter	325305	325305	325305	325305	325305	325305	325305	325305	325305	325305
Driftsavhengige kostnader	-158152	-158152	-158152	-158152	-158152	-158152	-158152	-158152	-158152	-158152
Avskrivninger	-145833	-145833	-145833	-145833	-145833	-145833	-145833	-145833	-145833	-145833
Rentekostnader	-60937.5	-55781.2	-48489.6	-41197.9	-33906.2	-26614.6	-21458.3	-14166.7	-6875	416.667
Resultat	-39617.6	-34461.4	-27169.7	-19878	-12586.4	-5294.68	-138.434	7153.23	14444.9	21736.6
Inngående gjeld	1218750	1115625	969792	823958	678125	532292	429167	283333	137500	-8333.33
Avdrag	-103125	-145833	-145833	-145833	-145833	-103125	-145833	-145833	-145833	-145833
Utgående gjeld	1115625	969792	823958	678125	532292	429167	283333	137500	-8333.33	-154167
Investeringsavkasting	167153	167153	167153	167153	167153	167153	167153	167153	167153	167153
Akk. avkastning	-1.16131e+06	-994161	-827008	-659855	-492702	-325548	-158395	8758.18	175911	343065
Internrente (IRR)	0.0117021
Kassalikviditet	3090.73	8246.98	15538.6	22830.3	30122	37413.6	42569.9	49861.6	57153.2	64444.9
Akkumulert	-249596	-241349	-225810	-202980	-172858	-135444	-92874.2	-43012.6	14140.6	78585.5

## Sheet: Tilskudd gjødsel til biogass
			Tilskudd ved bruk av egen gjødsel i biogass-anlegg
				[kr]	Antall	[kr]
			Melkeku	1937	70	135590
			Ammeku	1108	0	0
			Ungdyr av storfe	665	70	46550
			Avslgris	397	0	0
			Slaktegris	40	0	0
			1000 verpehøns og slaktekyllingmødre	11667	0	0
			1000 livkylling	1493	0	0
			1000 slaktekylling	595	0	0
			1000 slaktekalkun	7443	0	0
			1000 And	1493	0	0
			Sau > 1 år	210	0	0
			Mjølkegeit	210	0	0
			Hest	910	0	0
			Totalt			182140
		Detaljer: https://lovdata.no/dokument/SF/forskrift/2014-12-19-1815?q=biogass
		Store anlegg - Tilskudd for bruk av gjødsel til biogass
		Tilskudd husdyrgjødsel
		500 kr/tonn*(1-x^2) der x er andelen vann i gjødsla
				TS	Vann	Faktor	Sats	Støtte pr. tonn [kr]
		Gjødsel	4730	0.05	0.95	0.0975	500	48.75
		Separert gjødsel			1	0	500	0

## Sheet: Verdi biorest
Beregning av verdi på biorest
Beregning i forhold til bruk av mineralgjødsel og med basis i priser på mineralgjødsel
Med nåværende priser (2012) på mineralgjødsel, vil det neppe kunne regnes noen vesentlig verdi på biorest
Priser på vanlig brukt mineralgjødsel som basis for verdiberegning av biorest
			Nitrogen (N)	Fosfor (P)	Kalium (K)
Innhold, prosent			0.25	0.02	0.06
Kr per kg gjødsel			3	0.4	0.3
Kr per kg næringsstoff			12	20	5
Flytende biorest
Innholdet kan variere mye og kjemisk analyse anbefales			N	P	K	Sum kr/daa
Tilførsel	tonn/daa
TS-innhold	%	#DIV/0!
TS-mengde	tonn/daa	#DIV/0!
Næringsinnhold	kg/tonn		#DIV/0!	#DIV/0!	#DIV/0!
Utnyttingsgrad	%		0.6	1	0.9
Gjødslingseffekt	kg/daa		#DIV/0!	#DIV/0!	#DIV/0!
Gjødselverdi før spredning	kr/daa		#DIV/0!	#DIV/0!	#DIV/0!	#DIV/0!
Transport- og spredekostnad	kr/tonn					0
Ev. tap som følge av jordpakking	kr/daa
Ev. sparte kostn. til spr. av mineralgjødsel	kr/daa
Ev. verdi på langsiktig N-virkn. (10 kg N/tonn ts)	kr/daa
Gjødselverdi av biorest spredd på åkeren	kr/daa					#DIV/0!
	kr/tonn					#DIV/0!
Fremforhandlet pris						0
		Vanntilsetting til bioresten
		Vann m³	m³/døgn	Fordeling
			0	#DIV/0!
Biorest
Substrat	Ubehandla, tonn	Kategori	TS-innhold	Tonn biorest	Utråtning av VS	VS av TS	Utråtning av TS	Fordeling	Tonn TS igjen
…		…	0	0	0	0	0	#DIV/0!	0
…	0	…	0	0	0	0	0	#DIV/0!	0
…		…	0	0	0	0	0	#DIV/0!	0
…		…	0	0	0	0	0	#DIV/0!	0
…		…	0	0	0	0	0	#DIV/0!	0
…		…	0	0	0	0	0	#DIV/0!	0
…		…	0	0	0	0	0	#DIV/0!	0
Sum:	0		#DIV/0!	0				#DIV/0!	0
Næringsinnhold				Før behandl.	Etter behandl.	Før behandl.	Etter behandl.	Før behandl.	Etter behandl.	Før behandl.	Etter behandl.
Substrat	N %/tonn ts	P %/tonn ts	K %/tonn ts	N kg/tonn	N kg/tonn	NH4-N kg/tonn	NH4-N kg/tonn	P kg/tonn	P kg/tonn	K kg/tonn	K kg/tonn
…	0	0	0	0	0	0	0	0	0	0	0
…	0	0	0	0	0	0	0	0	0	0	0
…	0	0	0	0	0	0	0	0	0	0	0
…	0	0	0	0	0	0	0	0	0	0	0
…	0	0	0	0	0	0	0	0	0	0	0
…	0	0	0	0	0	0	0	0	0	0	0
…	0	0	0	0	0	0	0	0	0	0	0
Gjennomsnitt:				#DIV/0!	#DIV/0!		#DIV/0!	#DIV/0!	#DIV/0!	#DIV/0!	#DIV/0!
Verdi biorest red for utnyttelsesgrad							Gjødselverdi før behandling			Spredekostnader for substrat som ikke er gjødsel
Substrat	NH4-N	P	K	Pris kr/tonn	Kr tot		Pris kr/tonn	Kr tot		Tot spredekost.	Jordpakking	Spart mineralgjødsel	Langsiktig N
…	0	0	0	0	0		0	0		0	0	0	0
…	0	0	0	0	0		0	0		0	0	0	0
…	0	0	0	0	0		0	0		0	0	0	0
…	0	0	0	0	0		0	0		0	0	0	0
…	0	0	0	0	0		0	0		0	0	0	0
…	0	0	0	0	0		0	0		0	0	0	0
…	0	0	0	0	0		0	0		0	0	0	0
Gjennomsnitt/Sum:	0	0	0	#DIV/0!	0			0	Vann	0	0
										0	0	0	0
Spredeareal biorest
			Tilførsel			Fosfor		Nitrogen		Verdiøkning biorest
	Substratmengde	TS-innhold	tonn/daa	Rekker til daa	Fosformengde	Daa spredeareal	N-mengde	Daa spredeareal		Kr totalt	Kr /tonn biorest
Gjødsel	0	#DIV/0!	0	#DIV/0!	0	0	#DIV/0!	#DIV/0!		0	#DIV/0!

## Sheet: Substrater
Oversatt versjon av SGCs substrathandbok (2009)		Kategori	TS	VS (glødetap)	VS av TS	Metaninnhold	Virkningsgrad	Kommentar	Nm3 CH4/tonn VS	Nm3 CH4/tonn TS	Nm3 CH4/tonn våtvekt	Nm3 biogass/tonn VS	Nm3 biogas/tonn TS	Nm3 biogas/tonn våtvekt	MWh/tonn VS	MWh/tonn TS	MWh/tonn våtvekt	Avling kg ts/da	Andel av VS til metan	N% av ts	P% av ts	K% av ts	Tot N, kg/tonn	f_NH4-N, kg/tonn	e_NH4-N, kg/tonn	P, kg/tonn	K, kg/tonn
Nr	Verdiene bør kun brukes i tidlig forprosjektfase, det bør foretas analyser av aktuelle substrat
1	Bløtgjødsel, storfe	Husdyrgjødsel	0.085	0.068	0.8	0.65	0.94		213	170	14	327	261.538	22	2.0825	1.666	0.140924		0.5				4.06	2.43	3.0375	0.62	4.04
2	Fastgjødsel, storfe	Husdyrgjødsel	0.3	0.24	0.8		0.74		250	200	60				2.45	1.96	0.588		0.6				3.87	0.39	0.4875	1.02	6.93
3	Bløtgjødsel, svin	Husdyrgjødsel	0.08	0.064	0.8	0.645	0.93		268	213	17	414	329.201	26	2.62294	2.0825	0.1666		0.5				3.28	2.3	2.875	1.29	1.67
4	Fastgjødsel, svin	Husdyrgjødsel	0.16	0.1344	0.84		0.75	?	300	252	40				2.94	2.4696	0.395136		0.6				6.58	1.64	2.05	3.89	2.53
5	Hønsegjødsel	Husdyrgjødsel	0.415	0.3168	0.76		0.8	Ifølge Envirum	247	190	81				2.42278	1.862	0.78988		0.6				16.75	6.7	10.05	7.79	10.36
6	Kyllinggjødsel	Husdyrgjødsel	0.7		0.76		0.8	Ifølge Envirum	247	190									0.6				32.89	13.15	19.734	8.13	15.37
7	Sauetalle	Husdyrgjødsel	0.3	0.24	0.8		0.74		250	200	60				2.45	1.96	0.588		0.6
8	Hestegjødsel	Husdyrgjødsel	0.3	0.2385	0.795		1		170	136	41				1.66483	1.3279	0.39837		0.6
9	Pelsdyrgjødsel	Husdyrgjødsel	0.68	0.4828	0.71	0.66	0.75	?	220	156	106	333	236.667	161	2.156	1.53076	1.04092		0.6
10	Lann, svin	Husdyrgjødsel	0.01	0.0055	0.55		0.95	?	200	110	1				1.96	1.078	0.01078		0.5
11	Gras	Energivekster	0.33	0.291867	0.884444	0.555	1		300	263	88	541	475.488	159	2.94	2.5774	0.835695	700	0.5	2.72	0.21	2.5	8.976	-	5.95	0.693	8.25
12	Korn	Energivekster	0.86	0.8342	0.97		1		400	388	334				3.92	3.8024	3.27006	516	0.9	1.95	0.36	0.51	16.77	-	15.52	3.096	4.386
13	Mais	Energivekster	0.3	0.27	0.9	0.555	1		351	317	95	633	572.332	172	3.44089	3.1066	0.93198	1200	0.8	1.28	0.26	1.8	3.84	-	3.32	0.78	5.4
14	Hvete	Energivekster	0.86	0.8428	0.98	0.525	1.03	=Korn	390	382	329	742	727.619	626	3.82	3.7436	3.2195	688	0.9	1.95	0.36	0.51	16.77	-	15.52	3.096	4.386
15	Ensilasje (helsæd)	Energivekster	0.4	0.36	0.9		1		300	270	108				2.94	2.646	1.0584	600		2.03	0.3	2.43	8.12	-		1.2	9.72
16	Sukkerbete	Energivekster	0.245	0.229	0.935	0.525	0.98	Lettomsettelig	413	386	80	787	735.238	150	4.04783	3.7828	0.926492	1225		0.2	0.04	0.2	0.49	-		0.098	0.49
17	Poteter	Energivekster	0.25	0.2375	0.95	0.525	0.98		411	390	98	782	742.857	186	4.02316	3.822	0.9555	1000		0.4	0.06	0.6	1	-		0.15	1.5
18	Jordskokk	Energivekster	0.22				1	?		218	48					2.1364	0.470008	1100		s	s	s		-
19	Halm	Planterester	0.78	0.7087	0.905	0.7031	0.84	Avh. av strålengde	207	187	147	294	266	207	2.03346	1.8326	1.43962	350		0.7	0.1	1	5.46	-		0.78	7.8
20	Potetris	Planterester	0.15	0.12	0.8	0.555	0.95		317	254	38	571	456.588	68	3.10538	2.4843	0.372645			s	s	s		-
21	Sukkerbeteblad	Planterester	0.165	0.1306	0.79		0.89		337	266	45				3.29975	2.6068	0.438452			0.45	0.05	0.6	0.7425	-		0.0825	0.99
22	…	…	0	0	0	0	0		0
23	Agner og snerp	Planterester	0.87	0.783	0.9		0.8	Tungt omsettelig	250	225	196				2.45	2.205	1.91835			s	s	s
24	Park- og hageavfall	Planterester	0.6	0.36	0.6		0.9	?	250	150	90				2.45	1.47	0.882			s	s	s
25	Drank	Etanol- og stivelseindustri	0.08	0.0725	0.93		0.93		323	302	24	606	570	51	3.17	2.96	0.23			s	s	s
26	Glyserol	Etanol- og stivelseindustri	1	1	1	0.65	1	Lettomsettelig	380		376	579		730	3.72		3.68			s	s	s
27	Melasse	Etanol- og stivelseindustri	0.85	0.745	0.875	0.695	0.9	Lettomsettelig	422	374	318	606	533	683	4.1	3.7	3.1			s	s	s
28	Frukt- og grønnsaksavfall	Planterester	0.15	0.1425	0.95		0.67	Virker høyt	666	633	95				6.52989	6.2034	0.93051			s	s	s
29	Brød	Næringsmiddelindustri	0.61	0.53	0.868852	0.61	0.9	?	350	304	186	574	498.522	304	3.43	2.98016	1.8179			s	s	s
30	Sitrusskall	Næringsmiddelindustri	0.21	0.2	0.952381	0.58	1		300	286	60	517	492.611	103	2.94	2.8	0.588			s	s	s
31	Deig	Næringsmiddelindustri	0.67	0.6	0.895522	0.61	0.9	?	290	260	174	475	425.74	285	2.842	2.54507	1.7052			s	s	s
32	Animalsk fett	Næringsmiddelindustri	0.895	0.819	0.915							1000	915.084	819	6.5	5.94804	5.3235			s	s	s
33	Avskillerfett	Næringsmiddelindustri	0.04	0.038	0.95		0.9	?	682	648	26				6.67947	6.3455	0.25382			s	s	s
34	Fiskerens	Næringsmiddelindustri	0.42	0.41	0.97619	0.71	0.9	?	930	908	381	1310	1278.67	537	9.114	8.897	3.73674			s	s	s
35	Frityrfett	Næringsmiddelindustri	0.9	0.9	1		0.9	?	757	757	681				7.4137	7.4137	6.67233			s	s	s
36	Hundmat (tørrfôr)	Næringsmiddelindustri	0.905	0.825	0.91	0.635	0.9	?	615	561	507	970	887	801	6.025	5.495	4.97			s	s	s
37	Kaffegrut	Næringsmiddelindustri	0.28	0.2576	0.92	0.63	0.9	?	300	276	77	476	438.095	122	2.94	2.7048	0.757344			s	s	s
38	Potetgrøt	Næringsmiddelindustri	0.15	0.14	0.933333	0.6	0.9	?	300	280	42	500	466.667	70	2.94	2.744	0.4116			s	s	s
39	Potetmjøl	Næringsmiddelindustri	0.86	0.86	1	0.55	1	Virker sannsynlig	350	350	301	636	636.364	547	3.43	3.43	2.9498			s	s	s
40	Returprodukt fra meieri	Næringsmiddelindustri	0.2	0.19	0.95	0.67	0.9	?	520	494	99	776	737.313	147	5.096	4.8412	0.96824			s	s	s
41	Egg	Næringsmiddelindustri	0.27	0.2484	0.92		0.9	?				970	892.4	241	6.305	5.8006	1.56616			s	s	s
42	Eggmasse	Næringsmiddelindustri	0.17	0.16	0.941176	0.7	0.9	?	520	489	83	743	699.16	119	5.096	4.79624	0.81536			s	s	s
43	Eggeskall	Næringsmiddelindustri	0.82	0.07	0.0853659	0.72	0.9	?	300	26	21	417	35.5691	29	2.94	0.250976	0.2058			s	s	s
44	Fjæravfall	Næringsmiddelindustri	0.45	0.441	0.98	0.74	0.9	?	180	176	79	243	238.378	107	1.764	1.72872	0.777924			s	s	s
45	Sortert matavfall fra storhusholdning	Matavfall	0.13	0.12	0.923077	0.59	0.9	Høyt?	720	665	86	1220	1126	146	7.06	6.51	0.85			s	s	s
46	Sortert matavfall fra restaurant	Matavfall	0.265	0.23055	0.87	0.625	1	Sannsynlig	506	441	118	807	701.858	186	4.96195	4.3169	1.15273			s	s	s
47	Sortert matavfall fra grossist/butikk	Matavfall	0.15			0.585	0.92			470	71		801.891	120		4.606	0.6909			s	s	s
48	Sortert matavfall fra husholdninger	Matavfall	0.325	0.27625	0.85	0.625	0.92	Enkelte hevder lavere	461	392	128	735	624.744	204	4.51376	3.8367	1.2571			s	s	s
49	Sortert matavfall fra hushold. presset og spedd	Matavfall	0.1	0.08	0.8	0.65	0.9	?	470	376	38	723	578.462	58	4.606	3.6848	0.36848			s	s	s
50	Sortert matavfall fra hushold. kvernet og spedd	Matavfall	0.13	0.1196	0.92	0.67	0.9	?	600	552	72	896	823.881	107	5.88	5.4096	0.703248			s	s	s
51	Slakteriavfall-mage-/tarminnhold	Slakteriavfall	0.16	0.1328	0.83	0.625	0.9	?	434	360	58	690	573.077	92	4.2506	3.528	0.57036			s	s	s
52	Slakteriavfall-mykdeler	Slakteriavfall	0.3			0.675				660	198		977.637	293		6.468	1.9404			s	s	s
53	Slakteriavfallslam fra slakteri -renseanl.	Slakteriavfall	0.16			0.625				379	61		603.974	97		3.7093	0.593488			s	s	s
54	Slakteriavfall-spillblod	Slakteriavfall	0.1	0.095	0.95	0.625	0.9	?	547	520	52	877	833.333	83	5.36421	5.096	0.5096			s	s	s
55	Kloakkslam	Kloakkslam	0.21		0.7	0.6	0.9		600
56	Fiskeslam	Fiskeavfall	0.12		0.83	0.62	0.8		457
57	Fiske-ensilasje	Fiske-ensilasje	0.412		0.38525	0.65	0.9		600
58	Avvatnet gjødsel	Husdyrgjødsel	0.35		0.92		0.7		278
