# Supplementary material
Source: MDPI journal article supplement (https://www.mdpi.com/2071-1050/13/16/9227)
Supplement: s1 [file s1 › Supplements/Supplements 3_1.xls]

## Sheet: Klimagassutslipp
		Kommentar	Utslipp lagring og spredning ubehandlet gjødsel			Norsk mix	Europeisk miks
				Input					Referanse
		Se på tall fra Rodhe og Hansen	Utslipp av CH4 fra gjødesllager	10.2	kg CH4/tonn TS	117.334		[tonn CO2 ekv]	Modahl et al, 2016.
			Utslipp av NO2 fra gjødsellager	0.123	kg NO2/tonn TS	12.3339		[tonn CO2 ekv]	Modahl et al, 2016.
			Utslipp av NH3 fra gjødsellager	1.37	kg NH3/tonn TS	0.518408		[tonn NH3]	Modahl et al, 2016.
			Utslipp av N2O i forbindelse med spredning av gjødsel	0.547	kg N2O/tonn TS	54.851		[tonn CO2 ekv]	Modahl et al, 2016.
			Utslipp av NH3 i forbindelse med spredning av gjødsel	5.39	kg NH3/tonn TS	2.03958		[tonn NH3]	Modahl et al, 2016.
			Utslipp lagring og spredning biorest
			Utslipp av CH4 fra biorest i lager	3.37	kg CH4/tonn TS	18.0263		[tonn CO2 ekv]	Modahl et al, 2016.
		Ta med tak?	Utslipp av N2O fra biorest i lager	0	[kg NO2/tonn TS]	NB! Andre regner ut fra utråtningsgrad. Dette er et gjennomsnittstall
			Utslipp av NH3 fra biorest i lager	1.92		0.337836		[tonn NH3]	Modahl et al, 2016.
			Utslipp fra biorest fra lager med tett tak	0
			Utslipp av N2O i forbindelse med spredning av biorest	0.468	[kg NO2/tonn TS]	21.8221		[tonn CO2 ekv]	Modahl et al, 2016. s.43
			Utslipp av NH3 fra biorest i lager	6.17	[kg NH3/tonn TS]	1.08565		[tonn NH3]	Modahl et al, 2016.
		Økologisk, bruker ikke	Erstatning av mineragjødsel						https://norsus.no/publikasjon/evaluering-av-pilotordning-for-tilskudd-til-husdyrgjodsel-til-biogassproduksjon/
			Utslipp forbundet med produksjon og bruk av mineralgjødsel	8.7	tonn CO2/kg N
			Kg N tilsatt hvis konvensjonell gård (sjekk opp, satt inn tall basert på annen beregning)	15
			Utslipp	130.5
			Redusert utslipp produksjon strøm og varme
			Norsk el-kraft med opprinnelsesgaranti (også fysisk levert strøm..)	32.1	[g CO2/kWt]	14.7339			https://www.epd-norge.no/getfile.php/1310666-1559908334/EPDer/Energi/NEPD-1685-676_Hydroelectricity-from-Trollheim-Power-Station.pdf			https://www.nve.no/energibruk-effektivisering-og-teknologier/energibruk/hvor-kommer-strommen-fra/
			Norsk el-kraft uten opprinnelsesgaranti (2019-tall)	396	[g CO2/kWt]	181.764			https://www.nve.no/energiforsyning/opprinnelsesgarantier/varedeklarasjon-for-stromleverandorer/
			Produksjon biogass anvendt	459000	[kWt]
			Utslipp eget forbruk uten biogass-anlegg - kjøpt fra nett	110000		3.531	43.56	[tonn CO2 ekv]
		Antatt at man bruker 3/5 av egen produksjon	Utslipp eget forbruk med biogass-anlegg - kjøpt fra nett	38533.4		1.23692	15.2592	[tonn CO2 ekv]
		Eksempel med nordisk miks
		Sjekk artikkel	Utslipp materialer biogass-anlegg og utslipp drift
			Utslipp forbundet med bygging av anlegget	50	[g CO2/kWt]				https://www.sciencedirect.com/science/article/abs/pii/S1364032116301885
			Utslipp bygging av anlegg			22.95		[tonn CO2 ekv]
		Antatt 1 % av produksjonen, 384 Nm3 CH4	Utslipp forbundet med drift av anlegget - slip			#REF!		[tonn CO2 ekv]	Se Modahl et al, 2016. 1 % er nevnt
		Har allerede slangepsredning	Diesel transport og spredning gjødsel/biorest						Sissel Hansen
		Tradisjonell breispreder gir 15 ganger høyere utslipp	Dieselforbruk spredning	0.032	[Liter diesel/m3 gjødsel]
		Lystgassutslippene (C5 og C12) er også betydelig høyere ved	Tetthet diesel	0.84	[kg/liter]
		bruk av breispreder. Se egne beregninger Sissel	GHG utslipp per kg diesel	3.17	[kg CO2 ekv/kg Diesel]				https://www.miljodirektoratet.no/myndigheter/klimaarbeid/kutte-utslipp-av-klimagasser/klima-og-energiplanlegging/tabeller-for-omregning-fra-energivarer-til-kwh/
			Gjødselmengde uten biogass og uten tak	4000	[m3]
			Gjødselmengde med biogass og tak	3000	[m3]
			Mengde diesel uten biogass	128	[Liter
			Mengde diesel med biogass og tak	96	[Liter]
			Mengde diesel uten biogass	107.52	[kg]
			Mengde diesel med biogass og tak	80.64	[kg]
			Utslipp CO2 ekv uten biogass			0.340838		[tonn CO2 ekv]
			Utslipp CO2 med biogass			0.255629		[tonn CO2 ekv]
			Totale utslipp uten biogass			188.391	228.42	[tonn CO2 ekv]
			Totale utslipp med biogass			#REF!	#REF!	[tonn CO2 ekv]
		Pr år	Reduserte utslipp			#REF!	#REF!	[tonn CO2 ekv]	#REF!	kg CO2 ekv
			Kostnad pr tonn CO2			#REF!	#REF!	1000 kr/tonn CO2
			Hvis produksjonen hadde erstattet diesel til traktor eller andre kjøretøy
			Energi-innhold 1 liter diesel			9.8		kWh/liter diesel
			Grovt estimat liter diesel fra produksjonen(uten reduksjon pga tap i prosessen)			#REF!		liter diesel
			Reduserte utslipp ved å erstatte diesel			#REF!		tonn CO2 ekv
			Input
			Gjødsel	4730	[m3]
			Tetthet gjødsel
			TS gjødsel	6.2	%
			Tonn TS gjødsel	378.4	[tonn TS]
			TS biorest	3.72	%
			Tonn TS biorest	175.956	[tonn TS]
			CH4 - CO2	30.4	[CO2 ekv/CH4 ekv]
			N2O-CO2	265	[CO2 ekv/N2O ekv]
			Slip 1 % av produksjonen	#REF!	[Nm3 CH4]
			Tetthet Metan	0.7167	[kg/Nm3]
			Vekt metan	#REF!	[kg CH4]
			Hvis gårdsanlegget hadde kunnet oppgradere gassen…
			Traktor
			Dieselforbruk	12	[liter/time]
			Antall timer bruk i året	2000	[driftstimer]
			Dieselforbruk pr traktor og år	24000	[liter/traktor]
			Andel biogass som erstatter diesel	0.871		Forskjellig virkningsgrad gass og diesel-motor. Se Modahl et al, tabell 5.13
			Gassbehov traktor	27554.5	[ Nm3 CH4]
			Sparte utslipp ved å erstatte diesel med bigoass	63.9072	[tonn CO2 ekv]
			12000	km
			0.5	liter diesel/mil
			6000	liter diesel
			5040	kg diesel
			15.9768	Tonn CO2
			Målinger gjort ved JTI/Lena Rodhe, 2008	2.7	% av MCF
			MCF	260	[Nm3/tonn TS]
			Utslipp	7.02	Nm3/tonn TS
			Utslipp Skaun	2656.37	Nm3
			Vekt CH4	1903.82	kg CH4
			CO2-ekvivalenter	57.8761	tonn CO2 ekvivalenter

## Sheet: Verdi biorest
Beregning av verdi på biorest
Beregning i forhold til bruk av mineralgjødsel og med basis i priser på mineralgjødsel
Med nåværende priser (2012) på mineralgjødsel, vil det neppe kunne regnes noen vesentlig verdi på biorest
Priser på vanlig brukt mineralgjødsel som basis for verdiberegning av biorest
			Nitrogen (N)	Fosfor (P)	Kalium (K)
Innhold, prosent			0.25	0.02	0.06
Kr per kg gjødsel			3	0.4	0.3
Kr per kg næringsstoff			12	20	5
Flytende biorest
Innholdet kan variere mye og kjemisk analyse anbefales			N	P	K	Sum kr/daa
Tilførsel	tonn/daa
TS-innhold	%	#DIV/0!
TS-mengde	tonn/daa	#DIV/0!
Næringsinnhold	kg/tonn		#DIV/0!	#DIV/0!	#DIV/0!
Utnyttingsgrad	%		0.6	1	0.9
Gjødslingseffekt	kg/daa		#DIV/0!	#DIV/0!	#DIV/0!
Gjødselverdi før spredning	kr/daa		#DIV/0!	#DIV/0!	#DIV/0!	#DIV/0!
Transport- og spredekostnad	kr/tonn					0
Ev. tap som følge av jordpakking	kr/daa
Ev. sparte kostn. til spr. av mineralgjødsel	kr/daa
Ev. verdi på langsiktig N-virkn. (10 kg N/tonn ts)	kr/daa
Gjødselverdi av biorest spredd på åkeren	kr/daa					#DIV/0!
	kr/tonn					#DIV/0!
Fremforhandlet pris						0
		Vanntilsetting til bioresten
		Vann m³	m³/døgn	Fordeling
			0	#DIV/0!
Biorest
Substrat	Ubehandla, tonn	Kategori	TS-innhold	Tonn biorest	Utråtning av VS	VS av TS	Utråtning av TS	Fordeling	Tonn TS igjen
…		…	0	0	0	0	0	#DIV/0!	0
…	0	…	0	0	0	0	0	#DIV/0!	0
…		…	0	0	0	0	0	#DIV/0!	0
…		…	0	0	0	0	0	#DIV/0!	0
…		…	0	0	0	0	0	#DIV/0!	0
…		…	0	0	0	0	0	#DIV/0!	0
…		…	0	0	0	0	0	#DIV/0!	0
Sum:	0		#DIV/0!	0				#DIV/0!	0
Næringsinnhold				Før behandl.	Etter behandl.	Før behandl.	Etter behandl.	Før behandl.	Etter behandl.	Før behandl.	Etter behandl.
Substrat	N %/tonn ts	P %/tonn ts	K %/tonn ts	N kg/tonn	N kg/tonn	NH4-N kg/tonn	NH4-N kg/tonn	P kg/tonn	P kg/tonn	K kg/tonn	K kg/tonn
…	0	0	0	0	0	0	0	0	0	0	0
…	0	0	0	0	0	0	0	0	0	0	0
…	0	0	0	0	0	0	0	0	0	0	0
…	0	0	0	0	0	0	0	0	0	0	0
…	0	0	0	0	0	0	0	0	0	0	0
…	0	0	0	0	0	0	0	0	0	0	0
…	0	0	0	0	0	0	0	0	0	0	0
Gjennomsnitt:				#DIV/0!	#DIV/0!		#DIV/0!	#DIV/0!	#DIV/0!	#DIV/0!	#DIV/0!
Verdi biorest red for utnyttelsesgrad							Gjødselverdi før behandling			Spredekostnader for substrat som ikke er gjødsel
Substrat	NH4-N	P	K	Pris kr/tonn	Kr tot		Pris kr/tonn	Kr tot		Tot spredekost.	Jordpakking	Spart mineralgjødsel	Langsiktig N
…	0	0	0	0	0		0	0		0	0	0	0
…	0	0	0	0	0		0	0		0	0	0	0
…	0	0	0	0	0		0	0		0	0	0	0
…	0	0	0	0	0		0	0		0	0	0	0
…	0	0	0	0	0		0	0		0	0	0	0
…	0	0	0	0	0		0	0		0	0	0	0
…	0	0	0	0	0		0	0		0	0	0	0
Gjennomsnitt/Sum:	0	0	0	#DIV/0!	0			0	Vann	0	0
										0	0	0	0
Spredeareal biorest
			Tilførsel			Fosfor		Nitrogen		Verdiøkning biorest
	Substratmengde	TS-innhold	tonn/daa	Rekker til daa	Fosformengde	Daa spredeareal	N-mengde	Daa spredeareal		Kr totalt	Kr /tonn biorest
Gjødsel	0	#DIV/0!	0	#DIV/0!	0	0	#DIV/0!	#DIV/0!		0	#DIV/0!

## Sheet: Substrater
Oversatt versjon av SGCs substrathandbok (2009)		Kategori	TS	VS (glødetap)	VS av TS	Metaninnhold	Virkningsgrad	Kommentar	Nm3 CH4/tonn VS	Nm3 CH4/tonn TS	Nm3 CH4/tonn våtvekt	Nm3 biogass/tonn VS	Nm3 biogas/tonn TS	Nm3 biogas/tonn våtvekt	MWh/tonn VS	MWh/tonn TS	MWh/tonn våtvekt	Avling kg ts/da	Andel av VS til metan	N% av ts	P% av ts	K% av ts	Tot N, kg/tonn	f_NH4-N, kg/tonn	e_NH4-N, kg/tonn	P, kg/tonn	K, kg/tonn
Nr	Verdiene bør kun brukes i tidlig forprosjektfase, det bør foretas analyser av aktuelle substrat
1	Bløtgjødsel, storfe	Husdyrgjødsel	0.085	0.068	0.8	0.65	0.94		213	170	14	327	261.538	22	2.0825	1.666	0.140924		0.5				4.06	2.43	3.0375	0.62	4.04
2	Fastgjødsel, storfe	Husdyrgjødsel	0.3	0.24	0.8		0.74		250	200	60				2.45	1.96	0.588		0.6				3.87	0.39	0.4875	1.02	6.93
3	Bløtgjødsel, svin	Husdyrgjødsel	0.08	0.064	0.8	0.645	0.93		268	213	17	414	329.201	26	2.62294	2.0825	0.1666		0.5				3.28	2.3	2.875	1.29	1.67
4	Fastgjødsel, svin	Husdyrgjødsel	0.16	0.1344	0.84		0.75	?	300	252	40				2.94	2.4696	0.395136		0.6				6.58	1.64	2.05	3.89	2.53
5	Hønsegjødsel	Husdyrgjødsel	0.415	0.3168	0.76		0.8	Ifølge Envirum	247	190	81				2.42278	1.862	0.78988		0.6				16.75	6.7	10.05	7.79	10.36
6	Kyllinggjødsel	Husdyrgjødsel	0.7		0.76		0.8	Ifølge Envirum	247	190									0.6				32.89	13.15	19.734	8.13	15.37
7	Sauetalle	Husdyrgjødsel	0.3	0.24	0.8		0.74		250	200	60				2.45	1.96	0.588		0.6
8	Hestegjødsel	Husdyrgjødsel	0.3	0.2385	0.795		1		170	136	41				1.66483	1.3279	0.39837		0.6
9	Pelsdyrgjødsel	Husdyrgjødsel	0.68	0.4828	0.71	0.66	0.75	?	220	156	106	333	236.667	161	2.156	1.53076	1.04092		0.6
10	Lann, svin	Husdyrgjødsel	0.01	0.0055	0.55		0.95	?	200	110	1				1.96	1.078	0.01078		0.5
11	Gras	Energivekster	0.33	0.291867	0.884444	0.555	1		300	263	88	541	475.488	159	2.94	2.5774	0.835695	700	0.5	2.72	0.21	2.5	8.976	-	5.95	0.693	8.25
12	Korn	Energivekster	0.86	0.8342	0.97		1		400	388	334				3.92	3.8024	3.27006	516	0.9	1.95	0.36	0.51	16.77	-	15.52	3.096	4.386
13	Mais	Energivekster	0.3	0.27	0.9	0.555	1		351	317	95	633	572.332	172	3.44089	3.1066	0.93198	1200	0.8	1.28	0.26	1.8	3.84	-	3.32	0.78	5.4
14	Hvete	Energivekster	0.86	0.8428	0.98	0.525	1.03	=Korn	390	382	329	742	727.619	626	3.82	3.7436	3.2195	688	0.9	1.95	0.36	0.51	16.77	-	15.52	3.096	4.386
15	Ensilasje (helsæd)	Energivekster	0.4	0.36	0.9		1		300	270	108				2.94	2.646	1.0584	600		2.03	0.3	2.43	8.12	-		1.2	9.72
16	Sukkerbete	Energivekster	0.245	0.229	0.935	0.525	0.98	Lettomsettelig	413	386	80	787	735.238	150	4.04783	3.7828	0.926492	1225		0.2	0.04	0.2	0.49	-		0.098	0.49
17	Poteter	Energivekster	0.25	0.2375	0.95	0.525	0.98		411	390	98	782	742.857	186	4.02316	3.822	0.9555	1000		0.4	0.06	0.6	1	-		0.15	1.5
18	Jordskokk	Energivekster	0.22				1	?		218	48					2.1364	0.470008	1100		s	s	s		-
19	Halm	Planterester	0.78	0.7087	0.905	0.7031	0.84	Avh. av strålengde	207	187	147	294	266	207	2.03346	1.8326	1.43962	350		0.7	0.1	1	5.46	-		0.78	7.8
20	Potetris	Planterester	0.15	0.12	0.8	0.555	0.95		317	254	38	571	456.588	68	3.10538	2.4843	0.372645			s	s	s		-
21	Sukkerbeteblad	Planterester	0.165	0.1306	0.79		0.89		337	266	45				3.29975	2.6068	0.438452			0.45	0.05	0.6	0.7425	-		0.0825	0.99
22	…	…	0	0	0	0	0		0
23	Agner og snerp	Planterester	0.87	0.783	0.9		0.8	Tungt omsettelig	250	225	196				2.45	2.205	1.91835			s	s	s
24	Park- og hageavfall	Planterester	0.6	0.36	0.6		0.9	?	250	150	90				2.45	1.47	0.882			s	s	s
25	Drank	Etanol- og stivelseindustri	0.08	0.0725	0.93		0.93		323	302	24	606	570	51	3.17	2.96	0.23			s	s	s
26	Glyserol	Etanol- og stivelseindustri	1	1	1	0.65	1	Lettomsettelig	380		376	579		730	3.72		3.68			s	s	s
27	Melasse	Etanol- og stivelseindustri	0.85	0.745	0.875	0.695	0.9	Lettomsettelig	422	374	318	606	533	683	4.1	3.7	3.1			s	s	s
28	Frukt- og grønnsaksavfall	Planterester	0.15	0.1425	0.95		0.67	Virker høyt	666	633	95				6.52989	6.2034	0.93051			s	s	s
29	Brød	Næringsmiddelindustri	0.61	0.53	0.868852	0.61	0.9	?	350	304	186	574	498.522	304	3.43	2.98016	1.8179			s	s	s
30	Sitrusskall	Næringsmiddelindustri	0.21	0.2	0.952381	0.58	1		300	286	60	517	492.611	103	2.94	2.8	0.588			s	s	s
31	Deig	Næringsmiddelindustri	0.67	0.6	0.895522	0.61	0.9	?	290	260	174	475	425.74	285	2.842	2.54507	1.7052			s	s	s
32	Animalsk fett	Næringsmiddelindustri	0.895	0.819	0.915							1000	915.084	819	6.5	5.94804	5.3235			s	s	s
33	Avskillerfett	Næringsmiddelindustri	0.04	0.038	0.95		0.9	?	682	648	26				6.67947	6.3455	0.25382			s	s	s
34	Fiskerens	Næringsmiddelindustri	0.42	0.41	0.97619	0.71	0.9	?	930	908	381	1310	1278.67	537	9.114	8.897	3.73674			s	s	s
35	Frityrfett	Næringsmiddelindustri	0.9	0.9	1		0.9	?	757	757	681				7.4137	7.4137	6.67233			s	s	s
36	Hundmat (tørrfôr)	Næringsmiddelindustri	0.905	0.825	0.91	0.635	0.9	?	615	561	507	970	887	801	6.025	5.495	4.97			s	s	s
37	Kaffegrut	Næringsmiddelindustri	0.28	0.2576	0.92	0.63	0.9	?	300	276	77	476	438.095	122	2.94	2.7048	0.757344			s	s	s
38	Potetgrøt	Næringsmiddelindustri	0.15	0.14	0.933333	0.6	0.9	?	300	280	42	500	466.667	70	2.94	2.744	0.4116			s	s	s
39	Potetmjøl	Næringsmiddelindustri	0.86	0.86	1	0.55	1	Virker sannsynlig	350	350	301	636	636.364	547	3.43	3.43	2.9498			s	s	s
40	Returprodukt fra meieri	Næringsmiddelindustri	0.2	0.19	0.95	0.67	0.9	?	520	494	99	776	737.313	147	5.096	4.8412	0.96824			s	s	s
41	Egg	Næringsmiddelindustri	0.27	0.2484	0.92		0.9	?				970	892.4	241	6.305	5.8006	1.56616			s	s	s
42	Eggmasse	Næringsmiddelindustri	0.17	0.16	0.941176	0.7	0.9	?	520	489	83	743	699.16	119	5.096	4.79624	0.81536			s	s	s
43	Eggeskall	Næringsmiddelindustri	0.82	0.07	0.0853659	0.72	0.9	?	300	26	21	417	35.5691	29	2.94	0.250976	0.2058			s	s	s
44	Fjæravfall	Næringsmiddelindustri	0.45	0.441	0.98	0.74	0.9	?	180	176	79	243	238.378	107	1.764	1.72872	0.777924			s	s	s
45	Sortert matavfall fra storhusholdning	Matavfall	0.13	0.12	0.923077	0.59	0.9	Høyt?	720	665	86	1220	1126	146	7.06	6.51	0.85			s	s	s
46	Sortert matavfall fra restaurant	Matavfall	0.265	0.23055	0.87	0.625	1	Sannsynlig	506	441	118	807	701.858	186	4.96195	4.3169	1.15273			s	s	s
47	Sortert matavfall fra grossist/butikk	Matavfall	0.15			0.585	0.92			470	71		801.891	120		4.606	0.6909			s	s	s
48	Sortert matavfall fra husholdninger	Matavfall	0.325	0.27625	0.85	0.625	0.92	Enkelte hevder lavere	461	392	128	735	624.744	204	4.51376	3.8367	1.2571			s	s	s
49	Sortert matavfall fra hushold. presset og spedd	Matavfall	0.1	0.08	0.8	0.65	0.9	?	470	376	38	723	578.462	58	4.606	3.6848	0.36848			s	s	s
50	Sortert matavfall fra hushold. kvernet og spedd	Matavfall	0.13	0.1196	0.92	0.67	0.9	?	600	552	72	896	823.881	107	5.88	5.4096	0.703248			s	s	s
51	Slakteriavfall-mage-/tarminnhold	Slakteriavfall	0.16	0.1328	0.83	0.625	0.9	?	434	360	58	690	573.077	92	4.2506	3.528	0.57036			s	s	s
52	Slakteriavfall-mykdeler	Slakteriavfall	0.3			0.675				660	198		977.637	293		6.468	1.9404			s	s	s
53	Slakteriavfallslam fra slakteri -renseanl.	Slakteriavfall	0.16			0.625				379	61		603.974	97		3.7093	0.593488			s	s	s
54	Slakteriavfall-spillblod	Slakteriavfall	0.1	0.095	0.95	0.625	0.9	?	547	520	52	877	833.333	83	5.36421	5.096	0.5096			s	s	s
55	Kloakkslam	Kloakkslam	0.21		0.7	0.6	0.9		600
56	Fiskeslam	Fiskeavfall	0.12		0.83	0.62	0.8		457
57	Fiske-ensilasje	Fiske-ensilasje	0.412		0.38525	0.65	0.9		600
58	Avvatnet gjødsel	Husdyrgjødsel	0.35		0.92		0.7		278
