# Supplementary material
Source: MDPI journal article supplement (https://www.mdpi.com/2071-1050/13/16/9227)
Supplement: s1 [file s1 › Supplements/Supplements 4.xlsx]

## Sheet: Info
	Oplandske Bioenergi (Einar Stuve)
	Rudshøgda
	5000-6000 m3 skogsflis, 15 %, definert størrelse
	1400 m3 biokull
	3,2 GWh varme		400 kW	Kjøres kontinuerlig
	"Binde karbon tilsvarende utslippet fra 930 biler"
	Varme til 320 boliger
	Til etablering av trær i urbane miljø
	40 % av virket til pyrolyse og tørking, 40 % til biokull, 20 % til varme til kunder
	Kostnad 17 millioner. 7 millioner i støtte fra Innovasjon Norge. Oppjustert til 19 MNOK (7.9.2020)								https://www.nationen.no/landbruk/nytt-anlegg-skal-gjore-rester-fra-landbruket-til-energi-og-biokull/
	Leverandør Biomacon
	Oppstart 1.desember
	NB. Koblet opp mot energiebehov hos Nortura og skal installere stor ny akkumulatortank der slik at de får anvendt all varmen.
	Installert mer kapasitet for tørking og infrastruktur som gjør klart til å sette inn anlegg #2
	Semi-gassifisering?								https://biochar.international/guides/basic-principles-of-biochar-production/
	Sandnes kommune (Jan Egil Gjerseth)								https://www.sandnes.kommune.no/teknisk-og-eiendom/biokullanlegget-pa-vatne-driftsstasjon/
									http://www.avfallsforumrogaland.no/wp-content/uploads/2018/01/Biokull-IVAR.pdf							Salgsverdi 1 euro/kg		10,52 kr	pr 27.8.2020
	Leverandør Biomacon. Ønsker å nedskalere anlegg for å kunne levere anlegg til bønder. To bønder i Sverige har anlegg
	Var på befaring hos en en grisebonde i Tyskland. Hadde utarmet jord. Billigere å produsere selv enn å kjøpe.
	Produksjon for anlegget i Sandnes: 1 m3 biokull i døgnet
	Innsparing
	Kostnad nærmere 2 MNOK								https://www.miljodirektoratet.no/myndigheter/klimaarbeid/kutte-utslipp-av-klimagasser/klimasats/2017/lokal-produksjon-av-biokull-og-bioenergi/
	Standard Bio (Ove Lerdahl)
	Egen teknologi - Flameless combustion								https://biochar.international/guides/basic-principles-of-biochar-production/
	Input	Håndterer både flis og avvannet kumøkk?
	Pris	7 MNOK for selve anlegget. Grunnarbeid og øvrig infrastruktur kommer i tillegg
	Påpekte at at kvaliteten på biokullet er bedre enn f.eks. for Oplandske og Biomacon ut fra at temperaturen i prosessen er lavere.
	Annen input
	https://gartnerforbundet.no/wp-content/uploads/2018/11/9-RMeissner-Pyrolyse-Biokull.pdf

## Sheet: Forutsetninger
	Inn	5000-6000 m3 skogsflis
	Dieselforbruk for å ta ned og flise opp 5000-6000 m3 skogsflis
	Biokull produksjon	1400 m3
	Tørking av flis til bruk i pyrolyseanlegget	Tar hånd om overskuddsvarme utover det som skal leveres til skolebygg/oppvekssenter. Større andel enn hos Oplandske, da det er fuktigere klima i Trøndelag
	Varmeproduksjon	300	Antatt at 5 % mer går til tørking av virke
	Mulig varmeproduksjon	2628000
	Estimert behov skolebygg/oppvektssenter
	Etterbehandling biokull	Oppmaling og sikting
	Kull selges til	Tilsats i foret og til egen jord
	Pris anlegg	ca. 20 MNOK, Biomacon (tysk teknologi)
	Alternativ anlegg	ca. 10 MNOK, Standard Bio
	Fotavtrykk for biokull-anlegg?
	Andre effekter	Skogsflis vil måtte komme fra en kombinasjon av lauvskog/kantvirker som ryddes for økt grasavling og rundtømmer av gran.
		Albedo-effekt?
		Økt grasavling - Påvirkning på klimaregnskap?
		Aktiv skogsdrift påvirker allerede naturmangfold i Skaun Kommune						https://www.fylkesmannen.no/globalassets/utgatt/fm-sor-trondelag/dokument-fmst/miljo-og-klima/naturtypekartlegging/rapport-naturtypekartlegging-i-skaun-2012_lite_mfu.pdf

## Sheet: Klimagassutslipp
	Uttak og forbehandling av virke
	Behov løskubikk	5500	lm3
	Uttak fastkubikk gran		fm3
	Uttak fastkubikk lauvskog	2200	fm3	Kantvirke er ikke medregnet i skogtaksering? Ref.Adam OToole			Ref Ingvar T. Mulig å ta ut 100 m3 pr.dag med gravemaskin og aggregat, Dvs. 22 dager for å ta ned 2200 m3. 80 liter diesel går med per dag. I tillegg trenger han ca. 600 liter diesel på å flise opp 400 fm3 virke.
	Dieselforbruk uttak, transport og flising gran
	Dieselforbruk uttak, transport og flising lauvskog	5060	liter
	Tetthet diesel	0.84	[kg/liter]
	GHG utslipp per kg diesel	3.17	[kg CO2 ekv/kg Diesel]				https://www.miljodirektoratet.no/myndigheter/klimaarbeid/kutte-utslipp-av-klimagasser/klima-og-energiplanlegging/tabeller-for-omregning-fra-energivarer-til-kwh/
	Utslipp uttak, transport og flising gran					[tonn CO2 ekv]
	Utslipp uttak, transport og flising lauvskog			13.4738		[tonn CO2 ekv]
	Tørking (1-2 uker)	Restvarme fra pyrolyse-anlegget
	Redusert utslipp produksjon strøm og varme
	Norsk el-kraft med opprinnelsesgaranti (også fysisk levert strøm..)	32.1	[g CO2/kWt]	32.1			https://www.epd-norge.no/getfile.php/1310666-1559908334/EPDer/Energi/NEPD-1685-676_Hydroelectricity-from-Trollheim-Power-Station.pdf			https://www.nve.no/energibruk-effektivisering-og-teknologier/energibruk/hvor-kommer-strommen-fra/
	Norsk el-kraft uten opprinnelsesgaranti (2019-tall)	396	[g CO2/kWt]	396			https://www.nve.no/energiforsyning/opprinnelsesgarantier/varedeklarasjon-for-stromleverandorer/
	Produksjon varme anvendt	1000000	[kWt]
	El-behov hvis væke-vann VP, 75 % energibesparelse	250000					https://www.novap.no/sites/default/files/Arsvarmefaktor.pdf
	Redusere utslipp erstattet norsk el			8.025		[tonn CO2 ekv]
	Reduserte utslipp erstattet europeisk miks			99		[tonn CO2 ekv]
	Bruke el-behov ved bruk av varmepumpe
	Utslipp materialer biokull-anlegg og utslipp drift
	Utslipp forbundet med bygging av anlegget
	Utslipp bygging av anlegg			40		[tonn CO2 ekv]
	Utslipp forbundet med drift av anlegget					[tonn CO2 ekv]
	Karbonlagring						https://nibio.no/en/projects/carbo-fertil-implementing-biochar-fertilizer-solution-in-norway-for-climate-and-food-production-benefits/_/attachment/inline/faa95bc9-8ee3-4a1b-817d-0025db91a2d5:f9f1252bdb1351791d44749aa7cd611d8c8b5bbe/19R_V4_Ch02_Ap4_Method%20for%20Mineral%20SOC%20stocks%20with%20Biochar_advance.pdf
							Ref. Tatiana Rittl, NORSØK
	Volum biokull, oppgitt fra Oplandske	1400	[m3]				Table 1. The total change in carbon stocks of mineral soils associated with biochar amendment, tonnes
	Tetthet biokull	0.35	[tonn/m3]				sequestered C. For biochar produced from different materials and methods. Assuming application rate of 10 tonnes of biochar dry matter.
	Vekt biokull	490	[tonn]	https://www.biochar-journal.org/en/ct/71#:~:text=Typical%20values%20for%20biochar%20dry,and%20the%20biochar%20particle%20size					Pyrolyses		Gasification
	Lagrinsstabilt C, referanse	6.2	[tonn/10 tonn biokull]					350-450°C	450-600°C	>600°C	350-450°C
							Wood	5	2020-02-06	2020-09-06	3
	Omregningsfaktor	3.67	CO2 ekvivalenter tonn biokull	https://nibio.brage.unit.no/nibio-xmlui/bitstream/handle/11250/2591077/NIBIO_RAPPORT_2019_5_36.pdf?sequence=2&isAllowed=y			Herbaceous	2020-02-04	2020-02-05	2020-08-05	2
				s.64			Wood+Herbaceous	2020-06-04	2020-07-05	2020-03-06	3
							https://pubs.acs.org/doi/10.1021/acs.est.9b01615
				1114.95		[tonn CO2 ekv]
	Reduserte utslipp norsk miks			1069.5		[tonn CO2 ekv]
	Reduserte utslipp europeisk miks			1160.47		[tonn CO2 ekv]
	Kostnad anlegg	19	[MNOK]
	Kostnad pr tonn CO2			16.3726		1000 kr/tonn CO2
	Antatt antall gårder som bidrar til anlegg ( i lik grad)	10
	Redusert utslipp pr gård og år			116.047		[tonn CO2 ekv]
	Referanser andre, større besparelse og lavere kostnad/tonn CO2 ekv.	https://www.bondebladet.no/aktuelt/vil-gi-bonden-gull-for-biokull/

## Sheet: Kalkulator for lønnsomhet
							Grunnlagsdata for beregning av lønnsomhet på biovarmeanlegg
																			Nåverdier for å finne inntjeningstid
		Tall basert på info om anlegget til Oplandske. Ikke hensiktsmessig å publisere?				År	Investering	Energi salg	Inntekt fra energi	Andre inntekter	Tilskudd fra Innovasjon Norge	Sum inntekter inkl tilskudd	Energi- drifts- og vedlikeholdskostnader	Kontantstrøm med tilskudd fra IN	Kontantstrøm uten tilskudd fra IN				Med støtte	Uten støtte	År
		Innverdier					i kr	i kWh/år	i kr	i kr	i kr	i kr	i kr	i kr	i kr				-999999999	-999999999	0	" dummy startverdi
		Søkt støtte fra Innovasjon Norge	7000000	kr		1	19000000	1000000	600000	1.47e+06	7000000	9070000	588235	-1.05182e+07	-1.75182e+07				-9.92286e+06	-1.65266e+07	1
		Pris energisalg/redusert energibruk	60	øre/kWh		2	0	1000000	600000	1.47e+06	0	2.07e+06	588235	1.48176e+06	1.48176e+06				-8.6041e+06	-1.52079e+07	2
		Prosjektets levetid	20	år		3	0	1000000	600000	1.47e+06	0	2.07e+06	588235	1.48176e+06	1.48176e+06				-7.35998e+06	-1.39638e+07	3				1	Euro
		Startår (bruk 1 eller årstall)	1			4	0	1000000	600000	1.47e+06	0	2.07e+06	588235	1.48176e+06	1.48176e+06				-6.18628e+06	-1.27901e+07	4				10.63	kroner
		Brenselspris pr kWh	35	øre/kWh		5	0	1000000	600000	1.47e+06	0	2.07e+06	588235	1.48176e+06	1.48176e+06				-5.07902e+06	-1.16828e+07	5
		Driftskostnader	10	øre/kWh		6	0	1000000	600000	1.47e+06	0	2.07e+06	588235	1.48176e+06	1.48176e+06				-4.03444e+06	-1.06382e+07	6
		Vedlikehold	5	øre/kWh		7	0	1000000	600000	1.47e+06	0	2.07e+06	588235	1.48176e+06	1.48176e+06				-3.04898e+06	-9.65275e+06	7				Brensel/drift/vedlikehold	4.70367
		Sum brensel/drift/vedlikehold	50	øre/kWh		8	0	1000000	600000	1.47e+06	0	2.07e+06	588235	1.48176e+06	1.48176e+06				-2.1193e+06	-8.72308e+06	8
		Virkningsgrad	0.85			9	0	1000000	600000	1.47e+06	0	2.07e+06	588235	1.48176e+06	1.48176e+06				-1.24225e+06	-7.84602e+06	9
		Pris biokull	3000	kr/tonn		10	0	1000000	600000	1.47e+06	0	2.07e+06	588235	1.48176e+06	1.48176e+06				-414837	-7.01861e+06	10
		Utverdier:				11	0	1000000	600000	1.47e+06	0	2.07e+06	588235	1.48176e+06	1.48176e+06				365738	-6.23804e+06	11
		Nåverdi med støtte	5.67497e+06	kr		12	0	1000000	600000	1.47e+06	0	2.07e+06	588235	1.48176e+06	1.48176e+06				1.10213e+06	-5.50164e+06	12
		Nåverdi uten støtte	-928804	kr		13	0	1000000	600000	1.47e+06	0	2.07e+06	588235	1.48176e+06	1.48176e+06				1.79684e+06	-4.80694e+06	13
						14	0	1000000	600000	1.47e+06	0	2.07e+06	588235	1.48176e+06	1.48176e+06				2.45222e+06	-4.15155e+06	14
		Internrente med støtte	12.6131	%		15	0	1000000	600000	1.47e+06	0	2.07e+06	588235	1.48176e+06	1.48176e+06				3.07051e+06	-3.53326e+06	15
		Internrente uten støtte	5.27127	%		16	0	1000000	600000	1.47e+06	0	2.07e+06	588235	1.48176e+06	1.48176e+06				3.6538e+06	-2.94997e+06	16
						17	0	1000000	600000	1.47e+06	0	2.07e+06	588235	1.48176e+06	1.48176e+06				4.20408e+06	-2.39969e+06	17
		Inntjeningstid med støtte	11	år		18	0	1000000	600000	1.47e+06	0	2.07e+06	588235	1.48176e+06	1.48176e+06				4.72321e+06	-1.88057e+06	18
		Inntjeningstid uten støtte	99	år		19	0	1000000	600000	1.47e+06	0	2.07e+06	588235	1.48176e+06	1.48176e+06				5.21295e+06	-1.39083e+06	19
						20	0	1000000	600000	1.47e+06	0	2.07e+06	588235	1.48176e+06	1.48176e+06				5.67497e+06	-928804	20
		kWh per støttekrone	0.142857	kWh/kr		21	0		0	0	0	0		0	0				5.67497e+06	-928804	21
						22	0		0	0	0	0		0	0				5.67497e+06	-928804	22
		Middel kWh / levetid	1000000			23	0		0	0	0	0		0	0				5.67497e+06	-928804	23
						24	0		0	0	0	0		0	0				5.67497e+06	-928804	24
						25	0		0	0	0	0		0	0				5.67497e+06	-928804	25
						26	0	0	0	0	0	0	0	0	0				5.67497e+06	-928804	26
		Sumtall for kolonnene				27	0	0	0	0	0	0	0	0	0				5.67497e+06	-928804	27
		Investering	19000000			28	0	0	0	0	0	0	0	0	0				5.67497e+06	-928804	28
		Energi salg	20000000			29	0	0	0	0	0	0	0	0	0				5.67497e+06	-928804	29
		Inntekt fra energi	12000000			30	0	0	0	0	0	0	0	0	0				5.67497e+06	-928804	30
		Andre inntekter	2.94e+07			31	0	0	0	0	0	0	0	0	0				5.67497e+06	-928804	31
		Tilskudd fra Innovasjon Norge	7000000			32	0	0	0	0	0	0	0	0	0				5.67497e+06	-928804	32
		Sum inntekter inkl tilskudd	48400000			33	0	0	0	0	0	0	0	0	0				5.67497e+06	-928804	33
		Energi- drifts- og vedlikeholdskostnader	1.17647e+07			34	0	0	0	0	0	0	0	0	0				5.67497e+06	-928804	34
		Kontantstrøm med tilskudd fra IN	1.76353e+07			35	0	0	0	0	0	0	0	0	0				5.67497e+06	-928804	35
		Kontantstrøm uten tilskudd fra IN	1.06353e+07			36	0	0	0	0	0	0	0	0	0				5.67497e+06	-928804	36
						37	0	0	0	0	0	0	0	0	0				5.67497e+06	-928804	37
		Kalkyleark versjon 2.0				38	0	0	0	0	0	0	0	0	0				5.67497e+06	-928804	38
						39	0	0	0	0	0	0	0	0	0				5.67497e+06	-928804	39
						40	0	0	0	0	0	0	0	0	0				5.67497e+06	-928804	40
						41	0	0	0	0	0	0	0	0	0				5.67497e+06	-928804	41
						42	0	0	0	0	0	0	0	0	0				5.67497e+06	-928804	42
						43	0	0	0	0	0	0	0	0	0				5.67497e+06	-928804	43
						44	0	0	0	0	0	0	0	0	0				5.67497e+06	-928804	44
						45	0	0	0	0	0	0	0	0	0				5.67497e+06	-928804	45
						46	0	0	0	0	0	0	0	0	0				5.67497e+06	-928804	46
						47	0	0	0	0	0	0	0	0	0				5.67497e+06	-928804	47
						48	0	0	0	0	0	0	0	0	0				5.67497e+06	-928804	48
						49	0	0	0	0	0	0	0	0	0				5.67497e+06	-928804	49
						50	0	0	0	0	0	0	0	0	0				5.67497e+06	-928804	50
						51	0	'	0	0	0	0	0	0	0				5.67497e+06	-928804	98	" dummy sluttår
																			9999	9999	99

## Sheet: Calculations_drag hose with slu
Emission of greenhouse gases (GHG) in connetction with slurry spreading Skaun Økomjølk
	Scenario	1	2	3	4	5	6	7
	All calulations are based on yearly data	Slange+stripe	Slurry tanker
			Dry soil, rain shortly after spreading, cold air	Sun and wind, dry soil	Moist soil, rainy weather
Summary	Unit		Gode spreading conditions	Dry conditions	Wet conditions	wet soil, sun and wind	Average Slurry tanker	Poor N-effciency with slurry tanker is compensated
Emission of GHG on the farm related to slurrry spreading , included a new steel container for slurry storage in sceanrio1 and use of a slurry tanker older than 10 years for scenario 2 to 7	kg CO2 eq. /farm and year	38919.4	45433.9	48794.7	52093.2	55805.4	50531.8	66598.1
Emission of GHG on the farm related to slurrry spreading , with use of a slurry tanker older than 10 years for scenario 2 to 7 and without a new steel container for slurry storage in scenario1	kg CO2 eq. /farm and year	38324.2	45433.9	48794.7	52093.2	55805.4	50531.8	66598.1
Emission of GHG on the farm related to slurrry spreading, included a new steel container for slurry storage in sceanrio 1 and purchase of new slurry tanker for scenario 2 to 7	kg CO2 eq. /farm and year	38919.4	46629.1	49989.9	53288.4	57000.6	51727	67793.3
Emission of GHG on the farm related to slurrry spreading , included a new steel container for slurry storage in sceanrio1 and use of a slurry tanker older than 10 years for scenario 2 to 7	Kg CO2 eq. More than scenario 1	0	6514.49	9875.28	13173.8	16886	11612.4	27678.7
Emission of GHG on the farm related to slurrry spreading, included a new steel container for slurry storage in sceanrio 1 and purchase of new slurry tanker for scenario 2 to 7	Kg CO2 eq. More than scenario 1	0	7709.67	11070.5	14369	18081.1	12807.6	28873.8
Emission of GHG per produced unit of grass dry matter (DM) in % of emissions with scenario 1, included a new steel container for slurry storage in sceanrio1 and use of a slurry tanker older than 10 years for scenario 2 to 7	% of scenario 1	100	131.693	161.112	201.897	263.827	180.89	171.118
Emission of GHG per produced unit of grass dry matter (DM) , included a new steel container for slurry storage in sceanrio1 and use of a slurry tanker older than 10 years for scenario 2 to 7	kg CO2 eq. / tonne grass DM	69.6233	91.6889	112.171	140.568	183.685	125.942	119.138
Emission of GHG per produced unit of grass dry matter (DM) in % of emissions with scenario 1, included a new steel container for slurry storage in sceanrio 1 and purchase of new slurry tanker for scenario 2 to 7	% of scenario 1	100	135.157	165.058	206.529	269.477	185.169	174.189
Emission of GHG per produced unit of grass dry matter (DM), included a new steel container for slurry storage in sceanrio 1 and purchase of new slurry tanker for scenario 2 to 7	kg CO2 eq. / tonne grass DM	69.6233	94.1009	114.919	143.793	187.619	128.921	121.276
Number of cows on the farm	Number of cows / farm	71	71	71	71	71	71	71
Production of energy corrected milk (ECM) per cow	kg milk / cow and year	8235	8235	8235	8235	8235	8235	8235
Production of milk on the farm	kg milk / farm and year	584685	584685	584685	584685	584685	584685	584685
Emission of GHG per produced unit of EKM milk, included a new steel container for slurry storage in sceanrio1 and use of a slurry tanker older than 10 years for scenario 2 to 7	Kg CO2 eq. Slurry spreading / litre milk	0.0665648	0.0777066	0.0834547	0.0890962	0.0954452	0.0864257	0.113904
Emission of GHG per produced unit of EKM milk, included a new steel container for slurry storage in sceanrio 1 and purchase of new slurry tanker for scenario 2 to 7	Kg CO2 eq. Slurry spreading / litre milk	0.0665648	0.0797508	0.0854988	0.0911404	0.0974893	0.0884698	0.115948
Purchase of new equipment, ten years depreciation	kg CO2 eq. /farm and year	1692.05	1195.18	1195.18	1195.18	1195.18	1195.18	1195.18
Exstra storage capasity, new container of steel and PVC, 500 m3	kg CO2 eq. /farm and year	595.229
Slurry pump, drible bars and hose drums	kg CO2 eq. /farm and year	639.193
Hoses (drag hose, supply hose and suction hose)	kg CO2 eq. /farm and year	457.626
Slurry tanker	kg CO2 eq. /farm and year		1195.18	1195.18	1195.18	1195.18	1195.18	1195.18
Size of steel container	m3/container	500
steel plates in new container	kg /container	2250
PVC in new container	kg /container	330
Weight of slurry pump, kg steel	kg / pump	250
Weight of dribble bars	kg / equipment	900
Weight of two hose drums 300 kg + 200 kg	kg total for hose drums	500
Kg equipment made of steel for slurry spreading in scenario 1 (slurry pump, hose drums and drible bars)	kg steel equipment	1650
Drag hose ø102mm 200m Type Dragman, fabric Polyurethane (TPU) + fibre of polyester, www.mandals.no	kg drag hose	270
Supply hose standard ø102mm 1800m type Flexitex Standard , Fabric: nitrile rubber and PVC	kg supply hose	1980
Suction hose totalt 9m ø152mm super elastic leverandør, materiale PVC	kg suction hose	53.1
Weight of slurry tanker	kg / slurry tanker		3500	3500	3500	3500	3500	3500
Diesel Slurryspredning	kg CO2 eq. /farm and year	899.078	5463.15	5463.15	5463.15	5463.15	5463.15	5472.2
Amount of slurry in m3	m3 /farm	4730	3678.89	3678.89	3678.89	3678.89	3678.89	3678.89
Diesel used for slurry spreading per m3 slurry (8 litre diesel per 250m3 slurry with slurry pump), + diesel for drag hose	litre diesel/m3 slurry	0.064
Diesel for slurry tanker	litre diesel/m3 slurry		0.5	0.5	0.5	0.5	0.5	0.5
Amount of diesel for spreading slurry with drag hose and dribble bars	litre diesel/farm	302.72
Amount of diesel for spreading slurry with slurry tanker	litre diesel/farm		1839.44	1839.44	1839.44	1839.44	1839.44	1839.44
Amount of diesel for spreading slurry	litre diesel/farm	302.72	1839.44	1839.44	1839.44	1839.44	1839.44	1839.44
Average driving distance per m3 slurry	km/m3 slurry	1.2	1.2	1.2	1.2	1.2	1.2	1.2	1.2
Amount of diesel for spreading artificial fertilizer per unit fertilizer	litre diesel/tonn fertilizer							0.5
Amount of fertilzer	kg fertilizer/farm							6097.56
Amount of diesel for spreading artificial fertilizer	litre diesel/farm							3.04878
N2O from slurry and fertilizer	kg CO2 eq. /farm and year	36328.3	39970.8	43331.6	46630.1	50342.2	45068.7	61125.9
N2O emission from production of articial fertilizer nitrogen	kg CO2 eq. /farm and year							5487.81
N consentration in slurry	kg N/tonn fertilizer	1.50528	1.93537	1.93537	1.93537	1.93537	1.93537	1.93537
NH4-N Consentration in slurry	kg NH4-N/tonn fertilizer	0.825203	1.06098	1.06098	1.06098	1.06098	1.06098	1.06098
Total amount of nitrogen spread in slurry	Kg N /farm and year	7120	7120	7120	7120	7120	7120	7120
Amount of slurry-N + fertilzer-N per daa	kg N/daa and year	8.27907	8.27907	8.27907	8.27907	8.27907	8.27907	10.0516	1.77255
Total amount of N in purchased fertilizer to compensate for N lost when slurry is spread with tanker	kg N/farm and year							1524.39	25-2-12'
Total amount of NH4-N in slurry spread	kg NH4-N/farm and year	3903.21	3903.21	3903.21	3903.21	3903.21	3903.21	3903.21
Amount of N lost as NH3,(based on: https://lmt.nibio.no/husdyrn/ ) Calculations further down	kg NH4-N/farm and year	968.319	1916.7	2825.21	2113.21	3115.71	2492.71	2492.71
Amount of N leached	kg NO3-N/farm and year	847.28	749.024	613.744	720.544	572.448	663.94	663.94
Kg N lost after spraying of slurry ( NH3-N volatilization + N-leaching, sum of spring and fertilization after 1 harvest)	kg N/farm and year	1815.6	2665.73	3438.96	2833.76	3688.16	3156.65	3156.65
Kg more N lost with NH3 volatilization than with scenario 1	kg N/farm and year	0	948.383	1856.89	1144.9	2147.39	1524.39	1524.39
Direct N2O emission after slurry spreading based on IPCC 2006	kg N2O-N/farm and year	71.2	71.2	71.2	71.2	71.2	71.2	71.2
Indirect N2O emission after slurry spreading, IPCC 2006 and NIBIOS N-calculator are used to estimate NH3 volatilization and N-leaching	kg N2O-N/farm and year	16.0378	24.7847	32.8552	26.5362	35.4505	29.9067	29.9067
Direct N2O emission after fertilizer spreading based on IPCC 2006	kg N2O-N/farm and year							15.2439
Indirect N2O emission after fertilizer spreading ( 22% of N leached(Holmengen, 2018)* emisjonsfacktor for utvasket -N). NH3-loss=0	kg N2O-N/farm and year							2.51525
Assumed increased N2O emission due to soil compaction relative to scenario 1, ratio	kg N2O-N slurry tanker/kg N2O-N drag hose with dribble bar	1	1	1	1.2	1.2	1.1	1.5
Assumed increased N2O emission due to soil compaction relative to scenario 1, amount	kg N2O-N/farm and year	71.2	71.2	71.2	85.44	85.44	78.32	101.186
Sum direct and indirect N2O-N emission after fertilization	kg N2O-N/farm and year	87.2378	95.9847	104.055	111.976	120.89	108.227	133.608
Sum direct and indirect N2O emission after fertilization	kg N2O /farm and year	137.088	150.833	163.515	175.963	189.971	170.07	209.955
Estimated grass yield fully cultivated soil kg DM/daa, good conditions	kg grass DM/daa	650	650	650	650	650	650	650
Area on the farm where it is possible to spread slurry	daa / farm	860	860	860	860	860	860	860
Total grass yield as in scenario 1	Kg grass DM /farm and year	559000	559000	559000	559000	559000	559000	559000
Assumed reduced yields because of damage on grass field caused by slurry tanker compared with scenario 1 in %	Reduksjon i % of scenario 1	0	0	0	20	20
Assumed reduced yields because of NH3-volatilization after spreading with lurry tanker compared with scenario 1 in %	Reduksjon i % of scenario 2	0	11.3556	22.1822	13.7044	25.6511
Assumed total grass yield compared with scenario 1 (reduction due to traffic and NH3-volatiliization)	kg grass DM/farm and year	559000	495522	435001	370592	303810	401232	559000
Beregninger og antakelser for Skaun til skjema
Slurry analyses kg N/tonn 2015 Spring	kg N/tonn Slurry	2.78	2.78
Slurry analyses kg N/tonn 2016 Spring	kg N/tonn Slurry	2.51	2.51
Slurry analyses kg N/tonn average	kg N/tonn Slurry	1.50528	1.93537
Slurry analyses kg NH4-N/tonn 2015 Spring	kg NH4-N/tonn Slurry	1.5	1.5
Slurry analyses kg NH4-N/tonn 2016 Spring	kg NH4-N/tonn Slurry	1.4	1.4
Slurry analyses kg NH4-N/tonn average	kg NH4-N/tonn Slurry	0.825203	1.06098
Dry matter Slurry 5.5% i 2015, 6.8% i 2016.	% DM in Slurry	6.15	6.15
Assumed DM content in slurry by spreading	% DM in Slurry	3.5	4.5
Bergninger NH3 tap bruker (https://lmt.nibio.no/husdyrn/ )antar spredning på eng
Part of slurry spread in spring	% of Slurry	60	60	60	60	60	60	60
Part of slurry spread after 1. harvest	% of Slurry	40	40	40	40	40	40	40
Assumed wind speed	Beaufort scale m/s	3	3	9	3	9
Temperature Spring	°C	4	4	10	4	10
Temperature Summer	°C	11	11	18	11	18
Drymattercontent in slurry	% DM i Slurry	3.5	4.5	4.5	4.5	4.5
Soil type in N-calculator (Sandy morraine (> 6% organic matter)		(Sandig morenejord (>6% mold)
Yeary precipitation	mm/år	1000	1000	1000	1000	1000
Amount Slurry per daa Spring	tonn/daa	3.5	2.72222	2.72222	2.72222	2.72222	2.72222	2.72222
Amount Slurry per daa Summer	tonn/daa	2	1.55556	1.55556	1.55556	1.55556	1.55556	1.55556
Ammonia-losses of applied total-N, Spring	% of total-N	12.4	25.2	36.8	27.8	40.6
Ammonia-losses of applied total-N, Summer	% of total-N	15.4	29.5	44	32.5	48.5
Leaching-losses of applied total-N, Spring	% of total-N	12.1	10.4	8.7	10	8.2
Leaching-losses of applied total-N, Summer	% of total-N	11.6	10.7	8.5	10.3	7.8
Fixed Factors
GHG-emissions per litre diesel	kg CO2 ekv/litre Diesel	2.97	LCIA - CML 2015, innhentet gjennom GaBi of Matthias Koesling 17. juni 2019
IPCC, 2006 estimate for N2O from direct emissions, factor for N applied with Slurry (0.03-3%)	kg N2O-N/kg N	0.01	IPCC, 2006
IPCC, 2006 estimat for N2O from indirect emissions, faktor of N lost via NH3 volatilization	kg N2O-N/kg NH4-N	0.01	IPCC, 2006
IPCC, 2006 estimat for N2O from indirect emissions, faktor of N lost by leaching (0.05 – 2,5%)	kg N2O-N/kg N-utvasket	0.0075	IPCC, 2006
Estimate for N2O from NOx, Calculation of atmospheric nitrogen emissions from manure in Norwegian agriculture*	kg N2O-N/kg NO-N	0.01	IPCC, 2006
Conversion from kg N2O-N to kg N2O ((14+14+16)/28)	kg N2O/kg N2O-N	1.57143	IPCC, 2006
Conversion from kg N2O-N to kg CO2 equivalents	kg CO2ekv/kg N2O	265	Greenhouse gas protocol (2016).
Assume one tonne Slurry= 1 m3	tonne/m3	1	Anslag
Kg fertilizer per kg N in artificial fertilizer Yara 25-2-12	kg/kg N	4	beregning 25% of Slurryvekt
N2O emissions from production per kg N produced in artificial fertilizer	kg CO2 eq. / kg N	3.6	Yara , 2012
Costs per working hour	NOK / hour	250	pers.med from Jørgen Soknes, mai 2019
Costs per kg fertilizer. Yara 25-2-12	NOK/ kg fertilizer	3.5	Pers med Rose Bergslid 3,41 for 25-2-12 i 2018
Duration of equipment	number of depreciation years	10	pers.med from Jørgen Soknes, mai 2019
Diesel costs per litre (May 2019)	kr/litre diesel	9.31	Pers med Rose Bergslid 3mai 2019
GHG-emissions from production of 1 kg steel wall in new Slurry container	kg CO2 eq./ kg steel wall	2.35404	EPD-Norge, 2019
GHG emissions from production of 1 kg PVC	kg CO2 eq./ kg PVC	1.987	Eco invent 2.2: Hirscher et al.,2010
GHG emission from production of 1 kg agricultural equipment	kg CO2 eq./ kg agricultural equipment	3.8739	Eco invent 2.2: Hirscher et al.,2010
GHGemissions from production of 1 kg slurry tanker	kg CO2 eq./ kg slurry tanker	3.4148	Eco invent 2.2: Hirscher et al.,2010
Weight of drag hose	kg /m hose	1.35	Mandals.NO, 2019
Weight of supply hose	kg /m hose	1.1	Mandals.NO, 2019
Weight of suction hose	kg /m hose	5.9	Merlett. NO, 2019
*http://tema.miljodirektoratet.no/no/Publikasjoner/2019/Januar/Calculation-of-atmospheric-nitrogen-emissions-from-manure-in-Norwegian-agriculture/
Costs
Costs for purchase of new eqipment with drag hose and dribble hose	NOK/equipment	600000
Costs for purchase of extra slurry container with steel and PVC of 500 m3	NOK/container	190000
Costs for new 10 tonn Slurry tanker	NOK/ slurry tanker		500000	500000	500000	500000	500000	500000
Assumed duration of equipment in number of years	Years	10	10	10	10	10	10	10
Yearly depreciation	NOK for purchase /number of depreciation years	79000	50000	50000	50000	50000	50000	50000
Working hours for spreading of Slurry	Hours per year, 2 spreading times	100	180	180	180	180	180	180
Costs for working hours for spreading of Slurry	NOK per year, 2 spreading times	25000	45000	45000	45000	45000	45000	45000
Costs purchase fertilzer Yara 25-2-12	NOK/ farm							21341.5
Diesel Costs	NOK/ farm	2818.32	17125.2	17125.2	17125.2	17125.2	17125.2	17153.6
Costs Slurry spreading per year included depreciation of equipment, Costs for working ours, diesel, purchase of fertilzer. Assume purchase of new equipment for drag hose with dribble bars, new container but use old slurry tanker	NOK/ farm	106818	62305.2	62305.2	62305.2	62305.2	62305.2	83675.1
Costs Slurry spreading per year included depreciation of equipment, Costs for working ours, diesel, purchase of fertilzer. Assume purchase of new equipment for drag hose with dribble bars, new container but use old slurry tanker	NOK /daa	124.207	72.4479	72.4479	72.4479	72.4479	72.4479	97.2966
Costs Slurry spreading per year included depreciation of equipment, Costs for working ours, diesel, purchase of fertilzer. Assume purchase of new equipment for drag hose with dribble bars, new container but use old slurry tanker	NOK / tonn grass DM	191.088	125.736	143.23	168.123	205.079	155.285	149.687
Costs Slurry spreading per year included depreciation of equipment, Costs for working ours, diesel, purchase of fertilzer. Assume purchase of new equipment for drag hose with dribble bars, new container and slurry tanker	NOK/ farm	106818	112125	112125	112125	112125	112125	133495
Costs Slurry spreading per year included depreciation of equipment, Costs for working ours, diesel, purchase of fertilzer. Assume purchase of new equipment for drag hose with dribble bars, new container and slurry tanker	NOK /daa	124.207	130.378	130.378	130.378	130.378	130.378	155.227
Costs Slurry spreading per year included depreciation of equipment, Costs for working ours, diesel, purchase of fertilzer. Assume purchase of new equipment for drag hose with dribble bars, new container and slurry tanker	NOK / tonn grass DM	191.088	226.277	257.758	302.557	369.063	279.453	238.811
Assumed grass yields per daa (reduction because of soil compaction and NH3-losses)	kg TS/daa	650	576.189	505.816	430.921	353.268	466.548	650
Grass yield reative to scenario 1	%	1	0.886444	0.778178	0.662956	0.543489	0.717767	1
Grass yield in relation to scenario 6	%	1.39321	1.235	1.08417	0.923637	0.757194	1	1.39321
