# Supplementary material
Source: MDPI journal article supplement (https://www.mdpi.com/2071-1050/13/16/9227)
Supplement: s1 [file s1 › Supplements/Supplements 5.xls]

## Sheet: Info
	Oplandske Bioenergi (Einar Stuve)
	Rudshøgda
	5000-6000 m3 skogsflis, 15 %, definert størrelse
	1400 m3 biokull
	3,2 GWh varme		400 kW	Kjøres kontinuerlig
	"Binde karbon tilsvarende utslippet fra 930 biler"
	Varme til 320 boliger
	Til etablering av trær i urbane miljø
	40 % av virket til pyrolyse og tørking, 40 % til biokull, 20 % til varme til kunder
	Kostnad 17 millioner. 7 millioner i støtte fra Innovasjon Norge. Oppjustert til 19 MNOK (7.9.2020)								https://www.nationen.no/landbruk/nytt-anlegg-skal-gjore-rester-fra-landbruket-til-energi-og-biokull/
	Leverandør Biomacon
	Oppstart 1.desember
	NB. Koblet opp mot energiebehov hos Nortura og skal installere stor ny akkumulatortank der slik at de får anvendt all varmen.
	Installert mer kapasitet for tørking og infrastruktur som gjør klart til å sette inn anlegg #2
	Semi-gassifisering?								https://biochar.international/guides/basic-principles-of-biochar-production/
	Sandnes kommune (Jan Egil Gjerseth)								https://www.sandnes.kommune.no/teknisk-og-eiendom/biokullanlegget-pa-vatne-driftsstasjon/
									http://www.avfallsforumrogaland.no/wp-content/uploads/2018/01/Biokull-IVAR.pdf							Salgsverdi 1 euro/kg		10,52 kr	pr 27.8.2020
	Leverandør Biomacon. Ønsker å nedskalere anlegg for å kunne levere anlegg til bønder. To bønder i Sverige har anlegg
	Var på befaring hos en en grisebonde i Tyskland. Hadde utarmet jord. Billigere å produsere selv enn å kjøpe.
	Produksjon for anlegget i Sandnes: 1 m3 biokull i døgnet
	Innsparing
	Kostnad nærmere 2 MNOK								https://www.miljodirektoratet.no/myndigheter/klimaarbeid/kutte-utslipp-av-klimagasser/klimasats/2017/lokal-produksjon-av-biokull-og-bioenergi/
	Standard Bio (Ove Lerdahl)
	Egen teknologi - Flameless combustion								https://biochar.international/guides/basic-principles-of-biochar-production/
	Input	Håndterer både flis og avvannet kumøkk?
	Pris	7 MNOK for selve anlegget. Grunnarbeid og øvrig infrastruktur kommer i tillegg
	Påpekte at at kvaliteten på biokullet er bedre enn f.eks. for Oplandske og Biomacon ut fra at temperaturen i prosessen er lavere.
	Annen input
	https://gartnerforbundet.no/wp-content/uploads/2018/11/9-RMeissner-Pyrolyse-Biokull.pdf

## Sheet: Forutsetninger
	Inn	5000-6000 m3 skogsflis
	Dieselforbruk for å ta ned og flise opp 5000-6000 m3 skogsflis
	Biokull produksjon	1400 m3
	Tørking av flis til bruk i pyrolyseanlegget	Tar hånd om overskuddsvarme utover det som skal leveres til skolebygg/oppvekssenter. Større andel enn hos Oplandske, da det er fuktigere klima i Trøndelag
	Varmeproduksjon	300	Antatt at 5 % mer går til tørking av virke
	Mulig varmeproduksjon	2628000
	Estimert behov skolebygg/oppvektssenter
	Etterbehandling biokull	Oppmaling og sikting
	Kull selges til	Tilsats i foret og til egen jord
	Pris anlegg	ca. 20 MNOK, Biomacon (tysk teknologi)
	Alternativ anlegg	ca. 10 MNOK, Standard Bio
	Fotavtrykk for biokull-anlegg?
	Andre effekter	Skogsflis vil måtte komme fra en kombinasjon av lauvskog/kantvirker som ryddes for økt grasavling og rundtømmer av gran.
		Albedo-effekt?
		Økt grasavling - Påvirkning på klimaregnskap?
		Aktiv skogsdrift påvirker allerede naturmangfold i Skaun Kommune						https://www.fylkesmannen.no/globalassets/utgatt/fm-sor-trondelag/dokument-fmst/miljo-og-klima/naturtypekartlegging/rapport-naturtypekartlegging-i-skaun-2012_lite_mfu.pdf

## Sheet: Klimagassutslipp
	Uttak og forbehandling av virke
	Behov løskubikk	5500	lm3
	Uttak fastkubikk gran		fm3
	Uttak fastkubikk lauvskog	2200	fm3	Kantvirke er ikke medregnet i skogtaksering? Ref.Adam OToole			Ref Ingvar T. Mulig å ta ut 100 m3 pr.dag med gravemaskin og aggregat, Dvs. 22 dager for å ta ned 2200 m3. 80 liter diesel går med per dag. I tillegg trenger han ca. 600 liter diesel på å flise opp 400 fm3 virke.
	Dieselforbruk uttak, transport og flising gran
	Dieselforbruk uttak, transport og flising lauvskog	5060	liter
	Tetthet diesel	0.84	[kg/liter]
	GHG utslipp per kg diesel	3.17	[kg CO2 ekv/kg Diesel]				https://www.miljodirektoratet.no/myndigheter/klimaarbeid/kutte-utslipp-av-klimagasser/klima-og-energiplanlegging/tabeller-for-omregning-fra-energivarer-til-kwh/
	Utslipp uttak, transport og flising gran					[tonn CO2 ekv]
	Utslipp uttak, transport og flising lauvskog			13.4738		[tonn CO2 ekv]
	Tørking (1-2 uker)	Restvarme fra pyrolyse-anlegget
	Redusert utslipp produksjon strøm og varme
	Norsk el-kraft med opprinnelsesgaranti (også fysisk levert strøm..)	32.1	[g CO2/kWt]	32.1			https://www.epd-norge.no/getfile.php/1310666-1559908334/EPDer/Energi/NEPD-1685-676_Hydroelectricity-from-Trollheim-Power-Station.pdf			https://www.nve.no/energibruk-effektivisering-og-teknologier/energibruk/hvor-kommer-strommen-fra/
	Norsk el-kraft uten opprinnelsesgaranti (2019-tall)	396	[g CO2/kWt]	396			https://www.nve.no/energiforsyning/opprinnelsesgarantier/varedeklarasjon-for-stromleverandorer/
	Produksjon varme anvendt	1000000	[kWt]
	El-behov hvis væke-vann VP, 75 % energibesparelse	250000					https://www.novap.no/sites/default/files/Arsvarmefaktor.pdf
	Redusere utslipp erstattet norsk el			8.025		[tonn CO2 ekv]
	Reduserte utslipp erstattet europeisk miks			99		[tonn CO2 ekv]
	Bruke el-behov ved bruk av varmepumpe
	Utslipp materialer biokull-anlegg og utslipp drift
	Utslipp forbundet med bygging av anlegget
	Utslipp bygging av anlegg			40		[tonn CO2 ekv]
	Utslipp forbundet med drift av anlegget					[tonn CO2 ekv]
	Karbonlagring						https://nibio.no/en/projects/carbo-fertil-implementing-biochar-fertilizer-solution-in-norway-for-climate-and-food-production-benefits/_/attachment/inline/faa95bc9-8ee3-4a1b-817d-0025db91a2d5:f9f1252bdb1351791d44749aa7cd611d8c8b5bbe/19R_V4_Ch02_Ap4_Method%20for%20Mineral%20SOC%20stocks%20with%20Biochar_advance.pdf
							Ref. Tatiana Rittl, NORSØK
	Volum biokull, oppgitt fra Oplandske	1400	[m3]				Table 1. The total change in carbon stocks of mineral soils associated with biochar amendment, tonnes
	Tetthet biokull	0.35	[tonn/m3]				sequestered C. For biochar produced from different materials and methods. Assuming application rate of 10 tonnes of biochar dry matter.
	Vekt biokull	490	[tonn]	https://www.biochar-journal.org/en/ct/71#:~:text=Typical%20values%20for%20biochar%20dry,and%20the%20biochar%20particle%20size					Pyrolyses		Gasification
	Lagrinsstabilt C, referanse	6.2	[tonn/10 tonn biokull]					350-450°C	450-600°C	>600°C	350-450°C
							Wood	5	2020-02-06	2020-09-06	3
	Omregningsfaktor	3.67	CO2 ekvivalenter tonn biokull	https://nibio.brage.unit.no/nibio-xmlui/bitstream/handle/11250/2591077/NIBIO_RAPPORT_2019_5_36.pdf?sequence=2&isAllowed=y			Herbaceous	2020-02-04	2020-02-05	2020-08-05	2
				s.64			Wood+Herbaceous	2020-06-04	2020-07-05	2020-03-06	3
							https://pubs.acs.org/doi/10.1021/acs.est.9b01615
				1114.95		[tonn CO2 ekv]
	Reduserte utslipp norsk miks			1069.5		[tonn CO2 ekv]
	Reduserte utslipp europeisk miks			1160.47		[tonn CO2 ekv]
	Kostnad anlegg	19	[MNOK]
	Kostnad pr tonn CO2			16.3726		1000 kr/tonn CO2
	Antatt antall gårder som bidrar til anlegg ( i lik grad)	10
	Redusert utslipp pr gård og år			116.047		[tonn CO2 ekv]
	Referanser andre, større besparelse og lavere kostnad/tonn CO2 ekv.	https://www.bondebladet.no/aktuelt/vil-gi-bonden-gull-for-biokull/

## Sheet: Kalkulator for lønnsomhet
							Grunnlagsdata for beregning av lønnsomhet på biovarmeanlegg
																			Nåverdier for å finne inntjeningstid
		Tall basert på info om anlegget til Oplandske. Ikke hensiktsmessig å publisere?				År	Investering	Energi salg	Inntekt fra energi	Andre inntekter	Tilskudd fra Innovasjon Norge	Sum inntekter inkl tilskudd	Energi- drifts- og vedlikeholdskostnader	Kontantstrøm med tilskudd fra IN	Kontantstrøm uten tilskudd fra IN				Med støtte	Uten støtte	År
		Innverdier					i kr	i kWh/år	i kr	i kr	i kr	i kr	i kr	i kr	i kr				-999999999	-999999999	0	" dummy startverdi
		Søkt støtte fra Innovasjon Norge	7000000	kr		1	19000000	1000000	600000	1.47e+06	7000000	9070000	588235	-1.05182e+07	-1.75182e+07				-9.92286e+06	-1.65266e+07	1
		Pris energisalg/redusert energibruk	60	øre/kWh		2	0	1000000	600000	1.47e+06	0	2.07e+06	588235	1.48176e+06	1.48176e+06				-8.6041e+06	-1.52079e+07	2
		Prosjektets levetid	20	år		3	0	1000000	600000	1.47e+06	0	2.07e+06	588235	1.48176e+06	1.48176e+06				-7.35998e+06	-1.39638e+07	3				1	Euro
		Startår (bruk 1 eller årstall)	1			4	0	1000000	600000	1.47e+06	0	2.07e+06	588235	1.48176e+06	1.48176e+06				-6.18628e+06	-1.27901e+07	4				10.63	kroner
		Brenselspris pr kWh	35	øre/kWh		5	0	1000000	600000	1.47e+06	0	2.07e+06	588235	1.48176e+06	1.48176e+06				-5.07902e+06	-1.16828e+07	5
		Driftskostnader	10	øre/kWh		6	0	1000000	600000	1.47e+06	0	2.07e+06	588235	1.48176e+06	1.48176e+06				-4.03444e+06	-1.06382e+07	6
		Vedlikehold	5	øre/kWh		7	0	1000000	600000	1.47e+06	0	2.07e+06	588235	1.48176e+06	1.48176e+06				-3.04898e+06	-9.65275e+06	7				Brensel/drift/vedlikehold	4.70367
		Sum brensel/drift/vedlikehold	50	øre/kWh		8	0	1000000	600000	1.47e+06	0	2.07e+06	588235	1.48176e+06	1.48176e+06				-2.1193e+06	-8.72308e+06	8
		Virkningsgrad	0.85			9	0	1000000	600000	1.47e+06	0	2.07e+06	588235	1.48176e+06	1.48176e+06				-1.24225e+06	-7.84602e+06	9
		Pris biokull	3000	kr/tonn		10	0	1000000	600000	1.47e+06	0	2.07e+06	588235	1.48176e+06	1.48176e+06				-414837	-7.01861e+06	10
		Utverdier:				11	0	1000000	600000	1.47e+06	0	2.07e+06	588235	1.48176e+06	1.48176e+06				365738	-6.23804e+06	11
		Nåverdi med støtte	5.67497e+06	kr		12	0	1000000	600000	1.47e+06	0	2.07e+06	588235	1.48176e+06	1.48176e+06				1.10213e+06	-5.50164e+06	12
		Nåverdi uten støtte	-928804	kr		13	0	1000000	600000	1.47e+06	0	2.07e+06	588235	1.48176e+06	1.48176e+06				1.79684e+06	-4.80694e+06	13
						14	0	1000000	600000	1.47e+06	0	2.07e+06	588235	1.48176e+06	1.48176e+06				2.45222e+06	-4.15155e+06	14
		Internrente med støtte	12.6131	%		15	0	1000000	600000	1.47e+06	0	2.07e+06	588235	1.48176e+06	1.48176e+06				3.07051e+06	-3.53326e+06	15
		Internrente uten støtte	5.27127	%		16	0	1000000	600000	1.47e+06	0	2.07e+06	588235	1.48176e+06	1.48176e+06				3.6538e+06	-2.94997e+06	16
						17	0	1000000	600000	1.47e+06	0	2.07e+06	588235	1.48176e+06	1.48176e+06				4.20408e+06	-2.39969e+06	17
		Inntjeningstid med støtte	11	år		18	0	1000000	600000	1.47e+06	0	2.07e+06	588235	1.48176e+06	1.48176e+06				4.72321e+06	-1.88057e+06	18
		Inntjeningstid uten støtte	99	år		19	0	1000000	600000	1.47e+06	0	2.07e+06	588235	1.48176e+06	1.48176e+06				5.21295e+06	-1.39083e+06	19
						20	0	1000000	600000	1.47e+06	0	2.07e+06	588235	1.48176e+06	1.48176e+06				5.67497e+06	-928804	20
		kWh per støttekrone	0.142857	kWh/kr		21	0		0	0	0	0		0	0				5.67497e+06	-928804	21
						22	0		0	0	0	0		0	0				5.67497e+06	-928804	22
		Middel kWh / levetid	1000000			23	0		0	0	0	0		0	0				5.67497e+06	-928804	23
						24	0		0	0	0	0		0	0				5.67497e+06	-928804	24
						25	0		0	0	0	0		0	0				5.67497e+06	-928804	25
						26	0	0	0	0	0	0	0	0	0				5.67497e+06	-928804	26
		Sumtall for kolonnene				27	0	0	0	0	0	0	0	0	0				5.67497e+06	-928804	27
		Investering	19000000			28	0	0	0	0	0	0	0	0	0				5.67497e+06	-928804	28
		Energi salg	20000000			29	0	0	0	0	0	0	0	0	0				5.67497e+06	-928804	29
		Inntekt fra energi	12000000			30	0	0	0	0	0	0	0	0	0				5.67497e+06	-928804	30
		Andre inntekter	2.94e+07			31	0	0	0	0	0	0	0	0	0				5.67497e+06	-928804	31
		Tilskudd fra Innovasjon Norge	7000000			32	0	0	0	0	0	0	0	0	0				5.67497e+06	-928804	32
		Sum inntekter inkl tilskudd	48400000			33	0	0	0	0	0	0	0	0	0				5.67497e+06	-928804	33
		Energi- drifts- og vedlikeholdskostnader	1.17647e+07			34	0	0	0	0	0	0	0	0	0				5.67497e+06	-928804	34
		Kontantstrøm med tilskudd fra IN	1.76353e+07			35	0	0	0	0	0	0	0	0	0				5.67497e+06	-928804	35
		Kontantstrøm uten tilskudd fra IN	1.06353e+07			36	0	0	0	0	0	0	0	0	0				5.67497e+06	-928804	36
						37	0	0	0	0	0	0	0	0	0				5.67497e+06	-928804	37
		Kalkyleark versjon 2.0				38	0	0	0	0	0	0	0	0	0				5.67497e+06	-928804	38
						39	0	0	0	0	0	0	0	0	0				5.67497e+06	-928804	39
						40	0	0	0	0	0	0	0	0	0				5.67497e+06	-928804	40
						41	0	0	0	0	0	0	0	0	0				5.67497e+06	-928804	41
						42	0	0	0	0	0	0	0	0	0				5.67497e+06	-928804	42
						43	0	0	0	0	0	0	0	0	0				5.67497e+06	-928804	43
						44	0	0	0	0	0	0	0	0	0				5.67497e+06	-928804	44
						45	0	0	0	0	0	0	0	0	0				5.67497e+06	-928804	45
						46	0	0	0	0	0	0	0	0	0				5.67497e+06	-928804	46
						47	0	0	0	0	0	0	0	0	0				5.67497e+06	-928804	47
						48	0	0	0	0	0	0	0	0	0				5.67497e+06	-928804	48
						49	0	0	0	0	0	0	0	0	0				5.67497e+06	-928804	49
						50	0	0	0	0	0	0	0	0	0				5.67497e+06	-928804	50
						51	0	'	0	0	0	0	0	0	0				5.67497e+06	-928804	98	" dummy sluttår
																			9999	9999	99
