# Supplementary material
Source: MDPI journal article supplement (https://www.mdpi.com/2071-1050/13/16/9227)
Supplement: s1 [file s1 › Supplements/Supplements 7 raw data_PES.xlsx]

## Sheet: Raw
weight	qgender	qage	q5	agerecode	regionnorecode2	q3	q4	q6	q7	q11_1	q11_2	q11_3	q11_4	q11_5	q8	q9	q10_1	q10_2	q10_3	q12	q13_1	q13_2	q13_3	q13_4	q14_1	q14_2	q14_3	q14_4	q15_1	q15_2	q15_3	q15_4	q16_1	q16_2	q16_3	q16_4	q16_5	q16_6	q17_1	q17_2	q17_3	q17_4	q17_5	q18	q19_1	q19_2	q19_3	q19_4	q19_5
1.19483	1	48	3241	2	1	3	2	1	2	2	3	4	2	2	6	3	5	5	5	1	0	0	1	0	5	5	5	5	5	5	5	5	3	4	6	2	6	6	2	6	5	6	1	4	4	4	4	3	4
0.983333	2	62	2008	3	1	2	2	2	5	1	1	2	2	2	3	3	3	3	3	2	0	0	1	0	3	3	2	4	3	3	6	5	6	4	6	1	6	6	6	6	6	6	2	6	6	5	3	5	4
0.983333	2	67	1850	3	1	4	2	3	1	1	2	2	2	2	4	3	2	3	3	2	0	0	1	0	2	4	5	4	5	1	3	5	3	2	1	2	2	4	2	3	2	2	2	3	3	4	4	2	3
0.983333	2	71	2315	3	1	4	2	1	2	1	1	1	1	1	4	3	2	3	2	2	0	1	0	0	6	6	6	6	6	6	6	6	6	2	6	6	6	6	2	6	6	6	6	6	8	8	8	8	8
0.827273	1	72	5145	3	2	4	2	1	4	3	2	3	2	3	3	1	5	5	5	1	0	0	1	0	3	5	3	3	5	5	5	5	4	5	3	1	1	5	5	3	3	5	1	5	2	1	3	4	3
0.827273	1	67	5252	3	2	3	2	2	5	2	1	2	2	2	2	3	3	3	3	2	0	0	0	1	3	3	3	2	6	5	6	5	4	4	4	4	4	5	4	5	5	3	5	4	3	2	2	3	5
0.983333	2	52	491	3	1	4	2	1	1	2	1	1	1	1	4	4	2	1	1	1	0	0	1	0	2	3	4	2	3	2	1	3	2	2	6	2	6	1	3	6	3	3	6	6	6	5	8	3	5
0.827273	1	66	5226	3	2	2	2	1	1	1	1	1	1	1	3	3	3	3	3	2	0	0	0	1	2	5	3	2	3	2	3	3	3	3	3	2	3	1	2	2	2	2	1	3	6	6	4	5	4
1.105	2	35	2019	2	1	5	2	5	1	2	1	1	3	2	5	4	3	3	2	1	0	1	0	0	3	3	3	6	4	4	2	4	3	4	6	1	2	2	1	1	2	4	4	3	2	2	5	4	6
0.827273	1	61	8920	3	2	2	2	1	1	1	1	2	1	2	4	2	4	3	3	2	0	0	1	0	4	4	3	2	1	3	4	3	4	4	4	5	5	4	3	4	3	3	4	4	4	4	4	4	4
0.827273	1	52	5282	3	2	4	2	2	1	2	2	2	2	1	3	3	2	3	3	2	0	0	0	1	3	2	3	3	2	1	2	3	4	4	3	1	3	3	3	2	3	2	2	5	1	1	4	1	4
1.09369	1	34	4355	1	2	4	2	2	1	2	1	2	2	2	4	3	3	3	3	1	0	0	1	0	4	4	4	4	3	3	3	4	3	4	4	2	4	1	2	3	2	2	1	4	4	6	4	5	6
1.18171	1	39	5700	2	2	4	2	1	1	2	2	3	1	1	4	4	3	3	3	1	0	1	0	0	4	3	3	2	3	2	3	4	2	3	2	1	3	3	1	2	3	2	2	2	4	4	3	5	5
1.105	2	42	2067	2	1	3	2	1	1	1	1	1	5	2	4	4	6	6	5	1	0	0	1	0	4	2	4	3	2	2	3	3	3	1	3	1	2	3	2	3	2	2	3	2	5	5	4	2	4
1.19483	1	48	3292	2	1	2	2	1	5	2	2	3	2	2	7	3	3	3	2	2	0	0	0	1	6	6	6	6	4	4	3	4	3	6	4	6	6	6	4	4	4	4	3	3	8	8	8	6	8
0.827273	1	64	5252	3	2	4	2	2	1	2	2	2	1	2	3	3	2	3	3	2	0	0	0	1	3	2	5	6	2	2	3	5	6	6	6	6	6	6	2	3	3	2	6	6	8	8	8	8	8
1.08976	2	46	4009	2	2	5	2	2	3	1	1	2	1	1	4	3	4	3	4	2	0	0	1	0	2	4	4	4	3	3	3	4	3	4	3	2	1	2	3	4	2	3	1	3	4	3	5	5	6
1.19	2	30	3780	1	1	2	2	1	5	1	1	1	1	1	3	2	2	2	2	2	0	0	0	1	2	3	2	2	3	2	2	4	2	2	2	2	3	4	2	3	3	2	4	3	4	4	4	3	5
1.19483	1	48	2069	2	1	2	2	1	1	1	1	1	1	1	3	4	3	3	5	1	0	0	1	0	4	4	4	3	2	2	2	5	3	2	1	1	1	5	1	3	2	1	1	3	5	4	4	4	5
1.18171	1	43	6995	2	2	2	2	1	1	1	1	1	1	2	5	2	2	3	3	1	0	1	0	0	4	1	4	4	4	1	1	4	1	1	1	3	6	6	1	2	2	3	6	2	6	7	6	7	7
1.19483	1	40	565	2	1	2	2	4	3	1	2	2	1	2	7	5	2	3	3	1	0	0	1	0	3	2	1	1	1	1	5	3	2	2	2	1	1	5	3	1	2	1	1	6	5	5	5	4	4
1.18171	1	47	4056	2	2	4	2	4	3	2	2	4	2	3	2	3	5	5	5	2	0	0	1	0	5	5	5	5	5	5	5	5	5	5	5	5	5	5	5	5	5	5	5	5	1	1	1	1	1
0.827273	1	65	7725	3	2	5	2	1	1	1	1	1	1	1	4	2	2	2	3	1	0	1	0	0	2	3	3	5	3	2	2	1	1	1	2	1	2	1	2	3	2	2	2	2	4	4	4	5	5
0	1	21	#NULL!	1	#NULL!	3	2	1	5	2	1	2	2	3	4	3	3	2	2	1	0	1	0	0	2	4	4	3	4	3	4	4	3	3	4	1	2	3	2	2	2	2	4	6	4	4	5	3	3
1.19	2	34	2080	1	1	2	2	1	5	1	1	1	5	5	4	4	5	5	5	2	0	0	1	0	5	5	5	5	2	1	3	5	6	6	5	6	6	6	6	6	6	6	6	6	1	1	1	4	6
1.06893	1	32	2323	1	1	4	2	3	3	1	2	2	1	1	3	2	2	2	3	1	0	1	0	0	2	4	3	2	2	2	2	4	3	2	3	2	3	3	2	3	2	2	3	3	5	4	5	5	6
1.19483	1	49	1823	2	1	2	2	2	1	1	1	3	1	2	2	3	5	5	5	2	0	0	1	0	5	4	3	2	5	2	2	3	4	2	3	2	3	2	2	3	2	2	1	4	7	7	6	7	7
1.12826	2	29	7056	1	2	5	2	3	1	2	2	2	2	2	4	3	3	3	2	2	0	0	1	0	2	2	3	3	4	2	2	4	3	2	3	2	2	3	4	4	2	2	4	3	4	4	5	5	5
1.19	2	32	3040	1	1	4	2	1	5	2	1	1	5	1	2	4	4	4	4	2	0	0	1	0	5	4	5	5	1	1	1	1	4	6	6	1	6	6	3	4	6	1	1	6	4	1	4	1	4
0.672245	1	63	2669	3	1	3	2	1	5	1	1	1	1	1	2	3	2	4	4	1	0	0	1	0	2	3	5	5	2	2	2	4	5	3	4	2	4	1	2	3	3	1	1	4	5	5	8	5	5
0.827273	1	75	4280	3	2	1	2	2	3	2	2	2	3	2	2	3	4	4	4	2	0	0	1	0	4	3	5	4	4	3	5	4	5	5	4	3	4	3	3	3	3	2	1	4	1	2	3	1	2
0.672245	1	73	2213	3	1	3	2	1	1	2	1	2	1	1	2	6	5	4	5	2	0	0	1	0	5	4	5	5	5	3	4	5	5	5	5	6	3	1	5	6	5	3	1	5	1	1	1	3	8
1.12826	2	33	5132	1	2	3	2	1	6	1	2	5	2	2	7	4	5	5	5	2	0	0	1	0	5	5	5	5	5	5	5	5	5	5	5	5	6	6	5	5	5	5	1	6	2	2	2	2	2
1.105	2	44	1540	2	1	5	2	5	5	2	1	3	2	2	4	3	3	4	5	2	0	0	1	0	6	6	6	6	2	2	3	5	6	6	6	6	6	6	6	6	2	2	1	2	8	8	8	8	8
0.827273	1	66	5416	3	2	4	2	4	4	1	1	1	1	1	4	3	1	2	3	1	0	1	0	0	2	2	2	2	3	1	1	4	1	1	3	2	5	1	2	3	2	1	2	2	4	5	6	5	6
1.46638	2	55	4624	3	2	3	2	1	1	2	1	2	2	2	4	4	3	3	3	1	0	1	0	0	2	3	3	3	3	3	4	4	3	6	4	3	3	3	3	3	6	4	3	6	5	5	7	6	6
0.827273	1	75	7027	3	2	5	2	3	1	2	1	2	1	3	4	4	3	4	4	2	0	0	1	0	3	4	4	2	5	5	5	5	4	2	6	6	2	1	4	6	3	6	3	5	8	2	3	8	4
1.18171	1	42	4021	2	2	4	2	4	4	1	1	2	2	2	4	2	2	4	4	1	1	0	0	0	3	2	4	3	4	4	3	5	3	4	2	1	2	2	2	2	6	1	1	6	3	3	4	6	4
0.983333	2	61	196	3	1	2	2	1	5	1	1	4	2	5	6	3	5	5	5	2	0	0	1	0	5	5	5	5	3	3	4	5	5	5	5	1	3	1	5	5	5	5	1	5	1	1	1	1	1
1.09369	1	34	6884	1	2	4	2	5	5	2	1	3	1	1	4	4	4	4	4	1	0	1	0	0	4	3	3	3	3	1	2	3	3	3	1	1	1	2	2	3	2	1	3	3	5	5	4	5	5
1.12826	2	28	4621	1	2	4	2	2	2	1	1	2	2	1	4	2	1	4	5	1	0	0	1	0	2	1	5	2	4	2	1	2	1	1	2	4	4	2	2	1	1	5	1	2	5	2	7	7	7
1.18171	1	45	5527	2	2	2	2	1	1	1	1	1	1	1	4	4	2	2	3	1	0	1	0	0	3	3	3	3	3	2	1	5	3	6	1	2	3	1	1	4	1	1	2	3	6	7	4	1	7
1.09369	1	32	9514	1	2	5	2	1	1	5	5	5	5	5	4	4	2	2	2	1	0	0	1	0	2	6	5	6	5	5	5	5	2	2	6	6	6	6	6	6	6	6	6	6	8	8	8	8	8
0.672245	1	74	2260	3	1	4	2	5	1	1	2	2	1	1	2	4	3	3	3	1	0	0	1	0	3	3	4	2	3	3	3	4	4	4	3	2	4	2	2	3	3	3	2	2	4	5	5	5	3
0	2	41	#NULL!	2	#NULL!	4	2	1	5	1	1	2	1	2	3	4	2	2	2	1	0	1	0	0	2	2	3	4	3	3	3	4	4	3	3	2	2	4	2	3	2	4	4	6	4	4	4	3	5
1.08976	2	43	6015	2	2	4	2	3	4	1	1	2	1	1	3	2	2	3	4	2	0	0	1	0	3	6	5	3	4	3	2	3	6	3	3	3	3	3	1	1	2	1	1	6	8	8	8	8	8
0.672245	1	64	1152	3	1	4	2	3	1	2	2	3	1	2	3	4	4	4	2	1	0	1	0	0	4	4	5	3	3	3	4	5	1	2	1	1	1	4	2	3	2	2	4	2	2	2	5	3	5
1.06893	1	33	686	1	1	5	2	4	4	1	1	1	1	1	4	2	2	2	2	1	0	0	1	0	4	2	2	3	3	1	1	5	2	2	6	2	6	6	2	2	2	4	4	6	5	5	5	5	5
1.19483	1	47	475	2	1	4	2	1	5	1	2	2	1	2	4	2	2	2	2	2	0	1	0	0	3	2	2	3	2	2	2	3	2	2	3	2	3	2	2	3	2	2	4	3	5	5	4	5	4
0.827273	1	75	5132	3	2	3	2	1	5	1	1	1	1	1	3	1	2	5	5	2	0	0	1	0	5	5	5	5	5	5	5	5	5	5	5	5	5	1	5	5	5	5	1	5	4	6	1	4	1
1.06893	1	23	3218	1	1	3	2	1	1	2	1	5	1	2	5	6	1	1	1	1	0	0	0	1	2	2	4	3	3	2	2	5	3	1	2	4	3	6	2	6	2	3	6	6	8	8	8	8	8
0.672245	1	72	3296	3	1	4	2	5	5	2	1	2	2	2	3	4	2	3	3	2	0	0	1	0	4	4	4	5	2	2	2	3	2	5	2	2	4	1	2	6	2	2	5	2	7	7	8	5	7
1.18171	1	43	5225	2	2	5	2	2	1	2	2	2	2	2	4	2	3	3	3	1	0	0	1	0	6	6	6	6	4	3	4	4	3	3	3	3	3	3	4	4	4	3	4	4	5	4	3	4	5
0.983333	2	65	781	3	1	5	2	3	2	1	2	2	1	2	3	4	3	2	4	1	0	0	1	0	5	5	4	5	3	2	2	3	4	2	2	2	4	1	2	4	2	1	3	3	5	4	8	5	5
1.19483	1	39	461	2	1	2	2	1	1	1	2	2	2	1	4	4	6	6	6	1	1	0	0	0	2	3	3	3	2	2	2	6	3	2	3	3	3	4	2	4	3	1	5	3	5	5	5	6	5
1.12826	2	30	7030	1	2	5	2	2	5	1	1	2	2	2	4	2	6	6	6	2	0	0	0	1	6	6	6	6	6	6	6	6	6	6	6	6	6	6	6	6	6	6	6	6	8	8	8	8	8
1.46638	2	52	5142	3	2	4	2	1	1	2	3	3	2	2	6	4	5	5	4	2	0	0	1	0	5	5	5	5	5	5	5	5	4	5	5	5	5	5	5	5	5	5	5	4	7	7	7	6	7
1.18171	1	41	9136	2	2	3	2	2	5	2	3	3	3	2	1	3	5	5	5	1	0	0	1	0	5	3	5	5	5	4	4	5	3	5	1	1	1	3	2	2	1	4	1	5	3	2	3	5	3
0.672245	1	53	1880	3	1	5	1	1	2	1	1	2	1	1	4	3	2	2	3	2	0	0	1	0	3	4	5	3	3	2	6	5	3	3	3	1	6	2	1	2	2	1	2	4	4	4	2	2	7
1.46638	2	66	4900	3	2	4	2	5	5	2	2	1	2	2	3	4	2	2	2	1	0	0	1	0	3	3	6	2	3	2	2	5	4	6	4	2	3	2	3	6	2	2	1	6	1	2	1	1	1
1.18171	1	49	9404	2	2	2	2	1	5	1	1	5	2	2	4	6	3	3	3	1	0	0	1	0	3	6	3	6	6	6	6	3	1	6	3	6	6	3	6	6	6	6	6	6	8	8	4	8	4
0.827273	1	71	4630	3	2	2	2	2	1	1	1	2	2	3	3	3	4	4	5	2	0	0	1	0	5	5	2	6	1	2	4	5	4	4	3	2	2	1	4	4	4	2	1	4	1	1	3	1	4
1.06893	1	30	1434	1	1	5	1	1	5	1	1	2	1	1	3	3	2	3	3	1	0	0	1	0	2	1	1	2	1	2	1	3	2	2	3	1	4	2	3	3	1	2	4	3	6	6	4	5	6
0.827273	1	59	8664	3	2	2	2	2	2	2	2	2	1	2	3	4	3	4	4	2	0	0	1	0	4	3	4	3	3	3	3	4	4	3	3	4	4	4	3	6	2	3	2	6	5	5	5	3	5
0.827273	1	69	8663	3	2	5	2	2	1	2	1	1	2	2	3	3	5	3	5	1	0	0	1	0	4	4	5	4	4	5	4	5	5	3	3	2	1	2	5	5	5	4	1	4	4	4	4	3	5
1.18171	1	38	6014	2	2	2	2	1	2	1	1	2	2	2	4	3	3	6	5	2	0	0	1	0	4	4	4	4	5	5	5	5	5	5	3	6	6	6	6	6	6	6	6	3	4	6	4	5	4
0.983333	2	68	1661	3	1	4	2	2	5	1	1	1	1	1	4	4	2	5	4	2	0	0	1	0	2	4	4	4	3	2	3	5	4	2	3	3	4	2	2	6	3	2	2	2	5	5	8	4	8
0.827273	1	66	4816	3	2	1	2	6	1	2	2	5	2	2	4	4	4	2	3	1	0	1	0	0	2	6	6	2	6	6	6	6	3	6	6	2	6	4	6	6	6	4	4	4	4	4	4	4	4
1.105	2	43	3660	2	1	3	2	5	5	2	1	5	5	2	4	4	6	6	6	2	0	0	1	0	2	5	5	5	6	6	1	6	5	5	2	1	2	6	3	6	6	6	2	6	8	8	8	8	8
0.672245	1	68	1929	3	1	4	2	3	2	2	1	2	2	1	3	2	2	3	3	2	0	0	0	1	5	3	5	5	5	5	5	5	6	6	6	6	6	6	5	5	5	4	5	6	2	5	2	3	8
1.18171	1	44	4770	2	2	4	2	1	4	2	1	1	1	1	4	3	3	1	4	1	0	0	1	0	3	3	5	5	1	1	1	5	4	5	1	1	3	1	3	4	3	1	2	4	6	6	6	3	2
1.19	2	34	3256	1	1	3	2	1	1	1	1	1	2	1	4	4	5	4	5	1	0	0	1	0	2	3	5	5	4	2	1	5	3	2	2	6	6	2	6	3	3	2	1	6	6	7	6	5	6
1.18171	1	44	7298	2	2	1	2	5	5	1	1	2	1	1	2	3	3	3	4	1	0	0	1	0	3	3	4	4	3	2	4	4	3	2	3	2	4	1	2	4	3	2	1	3	3	4	3	1	1
0	2	63	#NULL!	3	#NULL!	1	2	1	5	1	1	2	1	1	3	6	3	3	6	2	0	0	0	1	6	6	6	6	6	6	3	6	6	3	6	1	6	1	6	6	6	1	6	6	8	7	8	8	8
0.672245	1	54	1178	3	1	5	2	2	2	2	2	5	2	2	5	3	5	5	5	1	0	0	1	0	4	5	5	5	5	5	5	5	5	5	5	3	3	1	5	5	5	5	1	5	4	4	5	3	5
1.18171	1	35	8300	2	2	4	2	1	1	2	2	3	2	2	4	4	3	4	3	1	0	0	1	0	4	2	4	3	3	2	2	4	3	3	3	2	3	3	3	2	2	2	2	6	3	3	5	3	4
0.827273	1	73	4635	3	2	4	2	2	1	1	1	2	1	1	4	3	2	3	3	2	0	0	1	0	4	4	4	4	4	3	4	5	5	5	6	6	5	1	6	6	5	6	5	4	4	4	1	4	2
0.827273	1	68	8003	3	2	1	2	2	3	1	1	3	3	2	3	4	5	2	3	2	0	0	0	1	5	4	3	2	5	5	4	5	5	5	5	1	1	1	3	4	2	2	1	4	3	5	5	3	5
0.672245	1	73	2819	3	1	4	2	1	1	1	1	2	1	1	4	2	3	3	2	2	0	0	1	0	2	2	4	3	2	1	2	3	3	2	2	1	3	1	1	2	2	2	3	2	7	6	6	6	7
0.672245	1	69	3128	3	1	4	2	1	1	1	1	3	2	1	5	1	2	1	2	1	0	1	0	0	2	2	2	2	3	3	3	4	3	2	2	2	2	4	1	3	2	3	3	3	4	5	5	4	7
1.105	2	35	3050	2	1	5	2	6	1	1	1	2	1	1	4	3	3	3	3	1	0	0	1	0	2	3	4	4	2	2	3	5	3	2	3	3	6	6	3	3	2	2	2	3	4	5	5	3	5
1.08976	2	40	7504	2	2	5	2	1	5	2	2	2	2	2	4	3	6	6	4	1	0	0	1	0	2	3	4	5	3	3	6	5	3	6	3	3	6	2	2	4	3	3	6	3	3	4	5	3	6
0.672245	1	72	3120	3	1	3	2	1	5	2	2	1	2	1	4	4	2	2	3	2	0	0	1	0	2	2	3	3	3	2	2	6	4	2	3	2	2	2	1	4	3	2	6	2	7	7	6	6	7
0.827273	1	60	7506	3	2	2	2	4	2	1	2	3	1	1	3	3	3	3	2	2	0	0	1	0	3	3	4	5	2	1	3	5	3	2	3	1	6	6	2	6	3	4	4	3	5	6	4	3	5
0.827273	1	63	7099	3	2	5	2	4	3	2	1	1	2	2	4	3	3	2	3	1	0	1	0	0	2	3	3	3	5	4	5	5	3	3	3	2	1	4	2	4	3	3	3	4	2	2	2	1	6
1.08976	2	42	4844	2	2	4	2	1	1	1	1	1	2	2	4	3	2	2	2	2	0	0	1	0	2	6	6	6	3	3	3	5	3	2	6	4	3	3	2	2	2	2	4	3	5	5	4	5	5
1.19483	1	48	2130	2	1	2	3	1	1	1	2	2	2	1	3	3	3	2	2	2	0	0	1	0	4	4	4	4	3	4	3	3	3	3	3	3	3	3	3	3	2	3	2	3	4	4	4	5	5
1.18171	1	48	5310	2	2	2	2	1	5	1	2	2	2	1	4	5	4	5	5	1	0	0	1	0	3	2	5	3	4	2	3	4	3	2	6	1	2	3	3	3	4	2	2	4	4	5	4	3	4
1.105	2	47	1655	2	1	3	2	1	2	1	1	1	1	1	7	4	3	3	3	2	0	0	1	0	3	3	3	3	3	3	3	3	3	3	3	3	3	3	6	6	6	6	6	6	8	8	8	8	8
1.18171	1	37	4344	2	2	3	2	1	2	4	4	4	4	4	6	5	5	5	5	2	0	0	1	0	5	5	5	5	5	5	5	5	5	5	5	6	6	6	5	5	5	6	1	5	8	8	8	8	8
1.105	2	46	1827	2	1	5	2	1	5	1	5	2	2	2	4	4	2	3	2	2	0	0	1	0	2	2	4	3	3	2	6	4	2	2	3	2	6	6	6	6	6	2	4	3	5	5	5	3	5
1.46638	2	57	5578	3	2	3	2	1	1	1	1	1	1	2	4	2	2	2	2	2	0	0	0	1	2	3	4	2	4	2	2	5	2	1	1	1	3	3	1	3	2	4	4	6	5	5	5	5	6
1.19483	1	46	1746	2	1	2	2	1	1	1	2	3	2	2	2	4	5	5	5	2	0	0	1	0	5	5	5	5	2	2	2	5	5	3	5	5	6	3	5	5	5	3	1	5	2	2	8	2	1
0.672245	1	69	3040	3	1	4	2	1	1	1	1	1	1	1	4	4	2	2	2	2	0	0	1	0	2	2	2	3	1	1	3	5	2	1	2	2	3	1	1	2	2	1	3	2	7	7	6	7	7
0.983333	2	71	1383	3	1	5	2	2	5	3	1	1	1	3	3	2	5	5	5	1	0	0	1	0	5	5	5	5	5	5	5	5	4	4	2	1	1	1	2	2	5	1	1	6	4	2	4	2	4
0.827273	1	66	4821	3	2	4	2	1	5	1	1	1	1	1	3	3	4	3	3	1	0	0	1	0	4	4	5	4	5	3	3	5	3	3	3	1	1	2	1	3	1	1	1	6	8	8	8	7	6
1.19	2	30	669	1	1	5	2	1	5	1	1	2	1	2	4	3	2	2	3	1	0	0	1	0	1	2	3	3	1	1	2	6	2	2	6	2	2	6	2	6	2	2	6	2	4	4	5	5	6
1.12826	2	27	5231	1	2	5	2	2	1	1	1	2	5	2	4	4	4	4	4	2	0	0	1	0	6	6	6	6	6	6	6	6	6	6	6	6	6	6	6	6	6	6	6	6	8	8	8	8	8
1.08976	2	38	7089	2	2	4	2	1	5	1	1	1	2	2	4	5	6	6	1	2	0	0	0	1	6	6	6	6	3	2	2	6	6	6	6	6	6	6	6	6	6	2	6	6	4	4	4	4	4
0.827273	1	66	7760	3	2	2	1	5	1	3	3	3	2	2	2	3	4	5	5	2	0	0	1	0	5	5	5	5	3	3	3	5	6	6	6	6	6	6	6	5	4	3	1	1	8	8	8	8	8
1.19	2	25	3735	1	1	4	2	1	5	1	2	2	2	2	3	4	6	6	6	2	0	0	0	1	2	6	5	4	4	3	3	5	3	2	1	1	2	2	4	3	2	4	6	2	3	3	3	3	4
1.08976	2	46	9153	2	2	4	2	1	5	1	2	2	1	2	4	3	3	3	3	2	0	0	1	0	3	2	5	3	3	3	2	4	3	3	4	3	4	3	3	3	2	3	4	3	5	5	5	5	5
1.19	2	28	1880	1	1	4	1	1	2	1	2	3	1	2	3	2	3	4	4	1	0	0	1	0	4	3	2	3	5	5	3	4	1	4	2	4	4	2	1	4	3	2	2	3	5	5	4	4	4
0.827273	1	69	6516	3	2	2	2	1	1	2	1	3	2	2	2	3	3	3	3	2	0	0	1	0	4	4	4	4	3	3	3	4	4	3	3	4	3	2	5	5	4	3	1	3	4	5	4	4	5
1.08976	2	43	6510	2	2	5	2	2	1	2	2	2	2	2	3	3	3	3	3	2	0	0	1	0	3	3	3	3	3	4	3	3	3	3	3	3	3	3	3	3	3	3	2	3	4	4	4	4	4
0.827273	1	53	7227	3	2	4	2	1	5	1	1	2	1	2	4	3	4	4	4	1	0	0	1	0	6	6	6	6	6	6	6	6	6	6	6	6	6	6	6	6	6	6	6	6	8	8	8	8	8
1.08976	2	45	9060	2	2	2	1	1	1	1	1	2	2	1	2	3	5	5	5	2	1	1	0	0	1	2	5	5	4	1	2	3	1	3	2	1	2	3	2	3	4	1	1	3	5	5	4	2	4
1.06893	1	28	2074	1	1	5	2	4	1	3	3	3	2	3	5	3	4	4	2	1	0	1	0	0	3	3	3	2	3	3	2	4	4	1	3	2	4	4	2	3	1	4	4	3	5	5	5	5	5
1.18171	1	41	6640	2	2	4	1	3	3	2	3	2	2	2	4	4	4	2	2	1	0	1	0	0	2	2	2	2	3	3	3	3	3	3	1	1	2	2	2	2	2	2	3	2	6	4	5	5	5
1.06893	1	34	1781	1	1	4	2	1	2	2	2	4	2	2	3	4	3	4	3	1	0	0	0	1	2	4	5	5	4	2	4	5	4	4	4	3	2	2	2	4	2	4	2	4	5	5	4	3	5
0.672245	1	52	3040	3	1	2	2	2	1	1	2	2	1	1	4	4	3	4	5	2	0	0	1	0	4	3	3	3	5	5	3	5	5	5	3	5	3	3	4	3	5	1	1	4	5	5	4	2	4
0	2	36	#NULL!	2	#NULL!	5	2	1	2	2	1	2	1	1	4	5	5	5	5	2	0	0	1	0	4	4	5	5	5	5	5	5	5	2	6	2	1	2	3	5	5	5	1	2	7	6	7	3	4
1.18171	1	46	4618	2	2	4	2	2	1	3	2	5	1	2	4	4	2	3	3	1	0	0	1	0	5	5	4	5	4	1	4	5	4	2	1	1	6	1	2	6	6	6	1	6	2	2	3	4	4
1.09369	1	27	8450	1	2	1	2	1	3	2	1	5	2	1	4	4	3	2	2	1	0	0	1	0	2	3	3	6	4	4	3	3	2	3	4	3	3	3	3	6	4	4	3	6	5	5	4	5	5
1.19483	1	48	656	2	1	4	2	3	4	1	2	1	2	2	4	3	4	4	4	1	0	0	1	0	5	5	4	3	4	3	2	5	4	5	4	3	4	4	2	1	3	3	2	3	6	7	3	3	7
0.827273	1	56	7027	3	2	5	2	2	3	1	1	2	1	1	4	4	5	5	5	1	0	0	1	0	4	3	5	3	3	2	4	5	4	3	6	2	3	3	3	2	3	3	1	4	5	5	4	5	5
0.672245	1	67	2030	3	1	4	2	2	5	1	1	2	1	2	2	4	5	3	5	2	0	0	1	0	4	4	5	5	4	3	5	3	5	5	5	4	5	6	6	6	6	6	6	5	1	2	1	1	4
0.672245	1	73	1459	3	1	4	2	5	1	1	1	1	1	1	3	4	6	6	6	1	0	0	1	0	4	6	4	5	4	5	5	6	5	6	6	1	5	1	6	6	6	1	1	6	1	1	1	6	8
1.46638	2	75	5039	3	2	4	2	2	1	1	1	2	1	1	3	3	4	4	4	2	0	0	1	0	4	4	4	5	4	3	3	4	5	4	6	1	1	6	1	6	2	2	1	3	4	3	5	3	3
0.672245	1	61	3290	3	1	3	2	1	2	1	1	2	1	1	3	4	5	5	5	2	0	0	1	0	5	5	5	5	4	3	4	5	5	5	6	2	5	1	3	6	2	1	1	6	3	4	3	2	4
0.827273	1	67	4018	3	2	4	2	1	1	2	1	1	1	2	3	3	3	3	2	2	0	0	0	1	4	3	3	3	3	3	3	4	3	3	4	6	4	2	3	3	6	6	3	6	8	8	8	8	5
0.672245	1	67	656	3	1	4	2	1	3	2	3	3	1	2	3	3	3	4	5	1	0	0	1	0	4	4	5	4	5	5	5	5	5	5	6	5	6	6	5	5	5	6	1	5	1	1	8	1	4
0.983333	2	68	3123	3	1	1	2	1	1	2	2	2	2	2	3	4	3	4	4	2	0	0	1	0	4	4	4	4	4	4	4	5	4	3	6	3	3	3	6	6	3	2	2	6	6	5	5	5	6
0.672245	1	75	677	3	1	5	2	3	2	2	1	2	2	1	4	2	3	3	4	1	0	0	1	0	3	3	4	4	4	5	3	5	5	2	3	2	1	4	1	3	3	5	1	4	4	4	4	2	5
0.672245	1	67	3482	3	1	3	2	5	5	2	1	3	2	2	4	3	3	3	3	2	0	0	1	0	4	5	3	4	3	3	4	5	4	4	6	2	6	2	4	3	6	6	1	4	2	2	3	2	7
0.672245	1	60	2080	3	1	3	2	2	4	1	1	5	1	1	3	4	4	4	5	2	0	0	1	0	5	3	3	2	3	2	2	5	3	6	2	2	4	1	2	2	3	2	1	3	8	8	4	7	4
0.983333	2	66	3303	3	1	4	2	2	2	1	1	1	1	1	2	3	2	4	5	2	0	0	1	0	5	4	5	3	1	1	3	5	5	5	1	1	3	1	5	2	3	1	1	4	1	3	8	3	3
0.983333	2	75	1450	3	1	3	2	2	5	2	2	2	1	1	3	3	5	5	5	2	0	0	1	0	5	5	5	5	3	3	4	5	6	6	6	3	6	6	5	5	5	2	5	5	8	8	8	8	8
0.672245	1	73	2647	3	1	2	2	5	1	1	1	1	1	1	2	6	3	6	3	2	0	0	0	1	5	4	5	4	3	3	3	6	6	2	6	2	3	2	2	6	3	4	1	6	8	8	8	8	8
0.983333	2	61	3531	3	1	2	2	1	5	1	1	2	2	2	4	4	5	5	5	2	0	0	1	0	5	5	5	5	2	1	2	5	6	6	6	6	6	6	3	6	6	3	5	3	8	8	8	8	8
1.46638	2	68	4376	3	2	3	2	5	5	1	2	2	1	2	2	3	5	5	5	2	0	0	1	0	5	5	5	5	5	2	5	5	5	5	6	6	6	1	3	3	5	3	1	5	3	3	2	2	2
0.983333	2	51	1400	3	1	3	2	1	5	1	1	1	1	1	3	5	6	6	6	1	0	0	1	0	3	3	3	3	5	3	1	5	6	6	6	1	1	2	2	3	6	6	1	6	8	8	8	8	8
0.827273	1	71	6812	3	2	4	2	3	1	1	2	2	3	3	3	4	4	3	2	1	0	0	1	0	4	4	4	4	5	2	2	5	3	3	3	1	3	2	1	3	1	1	1	3	5	5	6	3	6
0.827273	1	69	7075	3	2	1	2	1	1	1	1	3	1	1	3	5	5	5	5	2	0	0	1	0	5	5	5	5	5	4	4	5	5	6	5	5	5	1	5	5	5	5	1	6	8	8	8	8	8
0.983333	2	56	1807	3	1	4	2	1	1	1	2	4	1	1	3	5	5	5	5	2	0	0	1	0	5	5	5	5	5	5	5	5	5	5	6	1	1	1	1	4	1	1	1	5	1	1	1	3	4
0.672245	1	66	2890	3	1	4	2	5	1	1	2	1	2	1	4	3	2	2	3	2	0	0	1	0	3	2	3	3	3	3	2	3	3	3	2	2	3	2	3	2	2	2	3	3	5	6	4	5	6
0.983333	2	65	484	3	1	5	2	4	4	2	2	2	2	3	3	6	5	5	5	1	0	0	1	0	5	5	5	4	3	3	6	5	5	4	6	3	1	5	4	4	6	6	1	5	4	4	1	5	5
0.983333	2	70	1395	3	1	5	2	2	1	1	1	2	1	2	4	4	6	6	6	2	0	0	1	0	3	4	5	4	3	3	6	4	4	6	6	2	6	6	6	6	3	4	6	6	4	4	4	4	4
0.827273	1	60	6270	3	2	5	2	4	2	1	1	1	1	2	4	3	2	2	3	2	0	0	1	0	4	4	5	5	4	4	4	5	4	4	3	2	2	4	2	3	2	2	1	6	5	4	8	3	4
0.672245	1	62	2324	3	1	4	2	1	1	2	1	1	1	3	4	3	3	3	3	1	0	0	1	0	3	2	3	2	4	2	2	4	3	3	3	3	3	3	3	3	3	3	3	6	4	4	4	4	4
0.983333	2	66	2640	3	1	4	2	3	4	1	1	1	1	1	4	3	2	3	2	1	0	1	0	0	1	3	3	3	4	1	1	5	1	3	6	5	1	6	2	6	1	2	5	6	5	5	4	8	4
0	2	68	#NULL!	3	#NULL!	3	2	3	4	2	1	2	5	5	2	3	3	3	4	2	0	0	1	0	5	5	5	5	5	5	5	5	5	6	6	6	4	6	5	5	5	5	5	6	8	8	8	8	8
0.672245	1	73	3111	3	1	4	2	3	1	2	2	2	1	1	3	3	3	3	3	2	0	0	0	1	4	3	4	3	4	5	3	5	4	3	3	6	6	6	4	5	5	3	1	5	5	5	8	8	5
0.983333	2	67	268	3	1	4	2	2	1	1	1	1	1	1	4	4	2	3	2	2	0	0	1	0	2	3	5	5	2	3	3	3	3	4	2	1	1	3	1	2	2	2	5	3	7	7	8	8	7
0.672245	1	67	1658	3	1	4	2	1	1	1	1	1	2	2	4	3	3	2	2	1	0	0	1	0	3	3	3	2	3	2	3	4	4	2	2	2	4	2	3	3	3	3	2	4	6	5	5	6	6
1.46638	2	59	9008	3	2	4	3	2	2	1	1	3	1	2	4	3	4	4	4	1	0	1	0	0	2	5	5	5	3	2	3	5	5	3	3	3	4	3	2	5	3	3	1	4	8	8	8	8	8
0.827273	1	67	6006	3	2	3	2	4	4	1	1	2	1	1	2	1	5	5	5	1	0	0	1	0	5	5	5	5	5	6	5	5	5	5	5	5	5	1	5	5	5	5	5	5	3	3	3	4	3
0.827273	1	63	7800	3	2	5	2	2	3	1	1	4	1	1	1	2	4	5	5	1	0	1	0	0	3	3	5	3	5	4	5	5	4	5	6	5	6	1	3	1	5	1	1	5	3	3	1	1	1
1.46638	2	64	5154	3	2	3	2	3	1	2	1	2	1	1	3	4	2	2	2	1	0	1	0	0	3	3	3	2	2	2	3	4	3	2	1	1	3	1	1	2	1	3	3	3	5	5	8	6	7
1.46638	2	75	5015	3	2	5	2	1	4	1	1	2	2	1	3	2	3	3	3	1	0	0	1	0	4	4	4	4	3	3	3	4	4	3	3	3	3	2	3	4	3	3	2	3	5	5	5	5	5
0.827273	1	71	7082	3	2	2	2	5	5	1	1	5	1	1	3	3	2	2	3	2	0	0	1	0	3	3	3	4	2	2	2	4	3	2	3	3	3	1	2	2	2	2	3	6	4	4	4	4	4
0.672245	1	50	259	3	1	4	2	3	2	1	1	2	2	1	4	3	2	3	3	1	0	0	1	0	2	5	2	2	3	2	1	5	3	2	2	2	2	2	1	2	1	3	4	6	5	5	8	6	6
0.672245	1	74	3748	3	1	3	2	1	5	1	2	2	2	2	1	3	5	5	5	2	0	0	1	0	5	5	5	5	4	5	4	4	5	5	5	6	5	1	5	5	5	4	1	5	1	1	1	1	1
1.46638	2	52	6421	3	2	3	2	1	1	1	1	1	1	1	3	2	2	4	3	2	0	0	1	0	2	3	5	5	2	2	3	3	3	3	3	2	2	1	2	2	3	1	1	2	5	5	2	4	3
0.983333	2	69	3470	3	1	4	2	1	1	1	1	1	1	1	3	6	5	4	4	2	0	0	1	0	5	5	5	5	3	3	6	4	5	5	6	1	6	1	3	2	2	2	5	5	7	8	8	7	7
1.46638	2	63	8400	3	2	3	2	1	1	2	2	2	1	2	4	4	3	2	3	2	0	0	0	1	5	4	5	5	4	2	2	4	6	6	6	2	3	2	2	2	2	2	6	2	4	4	5	1	4
1.19	2	29	260	1	1	4	2	3	2	2	1	2	2	3	5	3	2	2	2	1	0	1	0	0	2	2	4	5	4	3	2	3	2	3	2	2	2	2	2	3	1	1	3	2	3	4	6	2	4
1.18171	1	45	4817	2	2	3	2	1	4	1	1	2	1	1	2	2	3	3	3	1	0	1	0	0	1	2	2	2	2	2	2	3	1	1	2	3	2	2	2	2	2	1	3	2	7	7	6	4	5
0.672245	1	65	1476	3	1	5	2	4	5	3	1	2	2	3	3	4	2	5	5	2	0	0	1	0	5	5	5	5	5	5	5	5	5	6	5	6	6	6	6	6	6	6	5	6	8	8	8	8	8
0.983333	2	59	3258	3	1	2	2	5	1	1	1	5	2	1	3	3	5	5	5	2	0	0	1	0	5	5	5	5	5	5	5	5	5	6	5	6	6	6	6	6	6	1	1	6	8	8	8	8	8
0.983333	2	68	986	3	1	2	2	4	5	1	1	1	1	1	2	3	5	5	5	2	0	0	1	0	5	5	5	5	4	2	5	5	5	5	5	5	5	1	5	5	5	4	1	6	8	8	1	8	8
0.983333	2	63	1176	3	1	5	2	2	5	2	1	2	2	2	5	4	6	2	2	1	0	0	1	0	5	6	6	6	6	6	2	5	6	3	4	6	6	1	6	3	2	1	5	3	2	3	1	1	3
0.672245	1	74	3111	3	1	1	2	6	5	1	1	1	1	1	3	5	6	4	2	2	0	0	1	0	5	5	5	5	6	5	6	5	5	6	6	6	6	6	5	5	5	5	1	6	8	8	8	8	8
1.105	2	36	3516	2	1	4	2	1	1	1	1	5	5	5	3	6	6	6	6	2	0	0	1	0	6	6	6	6	6	6	6	6	6	6	6	6	6	6	6	6	6	6	6	6	4	4	4	4	4
0.827273	1	73	5252	3	2	4	2	1	1	1	1	1	1	1	3	4	6	6	6	2	0	0	1	0	6	5	5	5	6	6	5	5	6	6	6	6	6	6	6	6	6	6	6	6	8	8	8	8	8
0.672245	1	60	482	3	1	5	2	1	1	1	1	2	2	1	4	4	6	2	2	1	0	0	1	0	2	6	6	3	4	5	6	5	3	6	2	1	6	2	3	3	2	3	4	6	8	8	8	8	8
0.672245	1	62	2040	3	1	4	1	5	1	1	1	3	1	2	2	3	5	5	5	2	0	0	1	0	5	5	5	5	3	3	3	4	5	5	6	1	5	1	5	5	5	3	1	5	4	4	1	1	2
0.827273	1	69	8050	3	2	2	2	2	1	1	1	1	1	1	6	4	5	5	5	2	0	0	1	0	5	5	5	5	1	1	3	2	5	6	6	6	6	1	5	5	5	2	1	2	8	8	8	8	8
1.46638	2	75	4842	3	2	4	2	2	5	2	2	3	1	1	3	3	3	3	3	1	0	0	1	0	3	6	5	5	3	2	3	5	6	6	2	3	2	6	1	6	2	2	1	6	5	3	3	5	5
0.672245	1	62	2950	3	1	3	2	1	3	2	2	2	1	1	4	3	2	3	4	1	0	0	1	0	2	1	4	5	5	5	4	5	4	3	2	1	4	2	3	4	2	2	1	4	4	3	2	4	5
0.983333	2	72	377	3	1	5	2	2	5	1	1	2	1	2	3	3	2	2	3	1	0	0	1	0	3	3	2	2	4	3	2	5	2	1	2	1	2	3	1	4	1	2	2	3	5	5	8	5	5
1.46638	2	54	7340	3	2	4	2	1	1	1	2	2	1	2	4	3	3	3	3	1	0	0	1	0	5	5	5	5	3	3	2	3	3	3	3	3	2	4	2	4	2	2	2	2	5	4	4	5	5
0.672245	1	67	1408	3	1	5	1	1	1	3	2	3	2	4	4	1	4	5	5	1	0	0	1	0	4	5	4	5	5	5	5	5	5	5	1	1	3	1	5	5	5	3	1	5	1	1	1	7	3
0.672245	1	73	2750	3	1	1	1	1	1	2	2	2	1	1	3	2	2	3	4	2	0	0	1	0	4	3	4	4	2	2	2	5	3	3	2	1	1	2	2	2	2	1	2	3	4	4	3	3	4
0.672245	1	71	2240	3	1	2	2	1	2	2	2	3	4	3	2	4	5	4	4	2	0	0	1	0	4	4	4	4	5	4	3	5	5	6	5	6	6	1	5	5	5	5	1	6	1	1	1	1	1
0.672245	1	50	187	3	1	3	2	6	6	5	5	5	5	5	7	6	6	6	6	2	0	0	0	1	6	6	6	6	6	6	6	6	6	6	6	6	6	6	6	6	6	6	6	6	8	8	8	8	8
0.983333	2	67	1540	3	1	3	2	6	5	2	2	5	2	2	3	3	4	3	3	1	0	0	1	0	5	3	5	5	3	3	4	4	5	3	4	3	3	3	3	4	3	4	1	3	8	8	8	8	8
0.983333	2	54	139	3	1	4	2	4	3	1	1	2	1	1	3	3	4	4	4	2	0	0	1	0	4	4	4	4	3	1	2	3	3	3	2	3	6	3	2	2	4	2	1	3	4	6	4	3	3
0.672245	1	71	1850	3	1	4	2	1	5	1	1	2	1	2	3	3	3	3	3	1	0	0	1	0	4	4	3	3	3	3	3	5	3	3	3	3	3	2	3	3	3	2	2	3	3	4	4	3	5
0.672245	1	74	3269	3	1	4	2	1	1	1	1	3	1	1	3	3	5	3	3	2	0	0	1	0	3	3	5	4	3	2	3	6	6	6	6	6	6	1	3	6	3	2	1	6	8	8	8	8	8
0.983333	2	62	1397	3	1	4	2	2	1	2	1	2	3	2	3	4	4	4	5	2	0	0	1	0	4	4	5	5	3	3	4	5	5	6	6	6	6	6	6	6	4	3	3	6	8	8	8	8	8
0.983333	2	67	377	3	1	4	2	2	1	1	1	2	1	1	3	3	5	5	5	1	0	0	1	0	5	4	4	4	3	2	3	5	3	3	3	1	6	2	3	3	3	1	1	3	5	5	4	3	4
0.827273	1	71	7716	3	2	4	2	1	1	1	1	1	1	1	2	1	1	1	1	1	0	1	0	0	1	1	1	1	1	1	1	1	1	1	1	1	1	1	1	1	1	1	1	2	7	7	7	7	7
0.983333	2	60	2070	3	1	4	2	4	1	1	1	4	1	1	2	3	2	3	5	1	1	1	0	0	2	5	3	1	4	3	3	4	3	6	5	4	1	3	1	6	5	6	2	2	6	7	4	4	4
0.827273	1	50	5710	3	2	2	2	4	2	3	2	2	2	3	4	3	5	4	4	1	0	1	0	0	3	4	4	4	1	3	3	6	3	3	2	4	3	4	3	3	2	2	4	3	5	4	5	4	5
0.672245	1	58	657	3	1	4	2	3	5	1	1	2	2	2	2	4	5	5	5	2	0	0	0	1	5	3	5	5	5	5	6	5	6	6	3	2	6	6	6	6	6	6	1	6	8	8	8	8	8
0.672245	1	73	1606	3	1	1	2	3	2	1	1	1	1	2	4	2	2	3	3	1	0	0	1	0	5	5	5	5	5	4	5	5	4	5	4	5	5	6	5	5	5	5	5	5	8	8	8	8	8
0.983333	2	65	3138	3	1	4	2	1	1	1	1	5	1	2	5	4	3	1	2	2	0	0	1	0	3	4	5	4	5	3	5	5	5	4	4	6	6	6	2	4	2	4	1	6	4	5	4	4	4
1.46638	2	73	9593	3	2	5	2	3	2	1	1	2	2	5	3	6	3	3	3	2	0	0	0	1	3	3	4	3	6	3	3	5	6	6	6	6	6	6	6	4	6	6	4	6	8	8	8	8	8
0.983333	2	50	2050	3	1	4	2	1	2	1	1	1	1	1	4	4	3	3	3	2	0	0	1	0	3	3	3	3	2	2	2	3	3	2	3	3	3	3	3	3	2	2	2	2	5	5	5	5	5
0.983333	2	61	3753	3	1	2	2	5	5	1	1	5	1	1	2	3	3	3	3	2	0	0	0	1	3	3	3	3	2	2	3	5	6	6	6	6	6	6	6	1	1	1	1	6	8	8	8	8	8
1.46638	2	71	5416	3	2	2	2	2	3	1	1	1	1	1	4	2	1	1	2	2	0	0	0	1	2	2	3	1	2	2	1	1	3	1	2	1	3	1	1	3	2	1	4	2	5	7	4	5	7
0.827273	1	71	8481	3	2	2	2	2	1	2	1	2	2	2	3	3	2	3	3	2	0	0	1	0	3	4	3	3	4	3	3	5	4	4	3	2	2	4	2	3	2	2	2	4	5	4	5	5	5
0.672245	1	67	595	3	1	5	2	1	2	1	1	1	1	1	4	1	1	2	2	1	0	1	0	0	1	3	2	2	3	1	3	5	2	1	2	1	2	3	1	2	1	3	3	3	4	5	4	3	7
0.983333	2	54	2614	3	1	1	2	2	2	1	1	2	2	2	3	4	6	6	6	2	0	0	1	0	3	3	5	5	6	3	3	5	5	6	6	6	6	3	6	6	6	3	2	6	8	8	8	8	8
1.08976	2	39	8011	2	2	2	2	1	1	2	2	2	2	2	3	3	2	3	3	1	0	0	0	1	2	3	4	2	2	2	3	3	2	2	6	3	6	6	6	6	5	2	2	2	8	8	8	8	8
0.672245	1	63	1792	3	1	5	2	1	5	1	1	1	1	2	4	2	2	1	1	2	0	0	1	0	1	2	2	1	3	2	4	5	2	2	1	1	2	1	1	3	2	4	4	2	3	2	3	2	4
1.06893	1	28	1396	1	1	4	1	1	5	4	3	2	2	1	3	3	2	3	5	1	0	1	0	0	2	4	5	5	3	2	3	4	3	2	4	2	2	5	4	2	5	1	2	4	3	5	4	3	4
0.672245	1	69	1900	3	1	2	2	1	1	2	1	2	1	2	3	3	3	3	4	2	0	0	1	0	6	6	6	6	3	3	3	4	4	6	6	2	6	2	2	3	2	2	2	6	5	4	8	4	5
0.983333	2	50	1397	3	1	5	2	1	1	2	3	3	2	2	3	2	4	4	4	2	0	0	1	0	4	4	5	4	4	3	4	5	5	5	3	2	6	1	3	4	4	3	1	4	1	2	1	2	1
1.19	2	31	566	1	1	4	2	3	5	2	2	2	1	2	4	4	4	3	2	1	0	0	1	0	3	3	5	4	4	4	4	5	4	4	6	2	3	2	1	5	2	5	5	6	4	4	4	4	4
0.983333	2	60	2686	3	1	5	2	1	2	1	2	5	1	2	4	3	2	2	2	1	0	0	0	1	3	6	2	2	4	3	3	5	3	6	1	1	2	6	1	6	2	2	1	6	5	2	4	5	6
1.19483	1	45	1339	2	1	5	2	1	1	1	1	1	1	1	4	3	1	1	1	1	0	0	0	1	6	6	6	6	4	1	1	5	1	1	6	4	6	2	1	6	2	3	3	6	8	8	8	1	8
0.983333	2	61	3915	3	1	4	2	5	5	2	1	1	2	3	4	4	6	2	6	2	0	0	1	0	3	3	4	3	3	2	2	3	6	2	6	2	3	3	6	6	2	6	6	4	3	3	8	5	5
1.46638	2	59	7031	3	2	2	2	3	2	1	1	2	2	1	4	4	3	3	4	2	0	0	1	0	6	4	5	3	4	3	3	4	3	6	6	6	6	6	3	6	3	6	1	6	4	4	6	3	5
0.983333	2	52	3612	3	1	3	2	1	4	2	1	2	1	1	3	4	3	3	4	2	0	0	1	0	2	4	4	3	5	5	5	5	4	3	4	1	2	2	1	2	2	1	1	3	4	4	4	5	4
0.827273	1	61	9105	3	2	3	2	1	1	1	1	1	1	1	7	4	3	3	3	2	0	0	1	0	3	3	3	3	3	3	6	6	3	6	6	5	3	6	1	6	3	6	3	6	8	8	8	8	8
0.672245	1	73	381	3	1	4	2	1	2	1	2	2	2	1	3	4	2	2	4	1	0	0	1	0	3	3	5	4	4	5	4	3	4	3	2	2	3	3	1	4	2	3	1	2	6	6	4	6	6
1.105	2	48	567	2	1	4	2	2	1	2	2	5	1	1	4	4	3	3	3	1	0	0	1	0	3	6	6	6	5	4	2	5	5	6	4	1	2	6	2	6	2	4	6	6	5	5	8	2	6
0.672245	1	69	367	3	1	5	2	4	4	2	1	2	1	1	3	3	3	3	4	1	0	0	1	0	2	3	4	2	3	3	3	4	2	3	4	3	2	3	3	2	2	4	1	3	5	5	5	5	4
1.18171	1	41	4314	2	2	5	2	4	3	2	2	3	2	3	4	4	5	5	5	1	0	0	1	0	5	5	5	5	2	1	2	4	4	4	6	3	6	6	2	3	3	3	3	3	5	5	4	4	5
0.672245	1	63	2730	3	1	1	2	1	5	2	2	1	2	2	3	3	3	2	3	2	0	0	0	1	2	2	3	4	3	2	4	2	3	2	3	2	3	2	1	3	2	2	2	3	6	6	5	6	5
1.19483	1	37	3080	2	1	4	2	1	1	2	5	1	2	5	4	3	3	3	3	1	0	1	0	0	3	3	4	3	4	3	3	4	3	4	2	1	2	3	3	3	3	4	4	4	4	4	4	4	4
1.105	2	46	1384	2	1	4	2	1	1	1	1	2	1	1	3	2	5	5	5	1	0	0	1	0	4	3	6	5	3	2	2	2	6	6	6	2	6	1	2	6	3	1	1	3	3	5	2	3	5
0.827273	1	62	5018	3	2	2	2	4	4	1	1	2	2	1	4	2	5	5	4	2	0	0	1	0	5	5	5	5	5	5	5	5	5	5	5	5	5	5	5	5	5	1	5	5	1	1	4	1	1
0.983333	2	53	587	3	1	5	2	5	5	2	1	2	1	1	4	3	5	5	5	2	0	0	1	0	5	5	5	5	5	5	5	5	5	5	6	1	6	1	5	5	5	5	1	5	8	8	8	8	8
1.19483	1	49	2353	2	1	4	2	1	5	1	1	2	1	1	3	6	4	5	5	2	0	0	1	0	3	2	4	6	5	2	1	5	6	4	2	2	1	3	2	3	2	1	2	4	3	4	8	2	5
0.983333	2	60	1363	3	1	5	2	2	2	1	1	5	1	2	4	4	3	5	5	1	0	0	1	0	3	3	4	3	4	2	4	4	2	3	2	2	6	2	4	3	1	2	1	2	4	4	5	3	4
1.19483	1	49	862	2	1	2	2	4	3	1	1	4	1	1	1	1	1	1	1	2	0	0	1	0	5	5	5	5	5	5	1	5	3	3	3	3	3	3	3	3	3	3	3	5	7	7	7	7	7
0.672245	1	69	3535	3	1	3	2	1	1	1	1	2	2	2	2	3	5	5	5	2	0	0	1	0	5	5	5	5	5	5	3	5	5	5	6	2	6	1	6	5	6	6	1	5	8	8	8	8	8
0.827273	1	64	5541	3	2	4	2	1	5	2	1	3	1	1	2	4	5	5	5	2	0	0	1	0	5	4	5	4	4	3	4	5	5	5	6	1	6	1	5	5	5	2	1	6	1	2	1	1	1
0.672245	1	70	2335	3	1	4	2	1	1	1	1	2	1	1	4	3	5	5	5	2	0	0	1	0	5	5	5	5	5	5	5	5	5	5	5	1	6	1	5	5	5	5	1	5	4	6	5	5	6
0.827273	1	52	8522	3	2	4	2	4	4	1	1	2	1	2	3	2	4	4	4	1	0	1	0	0	3	3	5	5	3	2	2	5	4	4	4	3	4	2	3	2	3	3	5	4	3	4	3	3	5
0.827273	1	66	9102	3	2	4	2	1	1	3	2	2	2	3	2	4	5	5	5	1	0	0	1	0	5	5	5	5	6	3	3	4	4	4	6	1	1	4	3	3	6	3	4	4	2	1	4	4	4
0.827273	1	71	4340	3	2	2	2	2	1	1	1	2	1	1	3	2	3	3	3	2	0	0	1	0	3	5	5	5	3	3	3	4	3	3	3	3	3	3	3	2	3	3	4	3	6	5	4	7	4
0.827273	1	69	9620	3	2	4	2	2	2	1	1	2	1	1	3	1	5	5	5	2	0	0	1	0	5	5	5	5	5	5	5	5	5	5	5	5	5	5	5	5	5	5	5	5	2	5	1	1	4
0.827273	1	61	4355	3	2	5	2	5	5	2	2	5	1	2	4	5	3	5	6	2	0	0	1	0	5	3	6	3	3	3	2	5	3	3	2	1	2	3	2	3	2	2	1	6	4	4	8	3	5
1.08976	2	42	9010	2	2	5	2	1	4	2	1	1	2	2	4	2	2	4	3	1	0	1	0	0	2	3	2	3	3	1	2	5	1	1	3	1	4	3	1	3	3	2	4	6	7	7	7	6	7
0.827273	1	68	6392	3	2	1	2	6	5	1	1	2	1	1	2	3	3	4	5	2	0	0	1	0	5	5	5	5	6	3	6	6	6	6	6	6	6	6	6	6	6	6	6	6	8	8	8	8	8
0.827273	1	67	9609	3	2	2	2	5	5	1	2	3	1	2	5	4	5	4	4	2	0	0	1	0	4	5	3	5	5	3	4	5	5	3	6	1	6	1	3	6	3	1	3	5	2	3	1	1	3
0.983333	2	70	1156	3	1	4	2	1	6	1	1	2	1	1	3	5	5	5	5	2	0	0	1	0	5	5	5	5	2	3	3	5	5	5	6	6	6	6	6	6	5	1	1	6	8	8	8	8	8
1.105	2	42	3300	2	1	2	2	1	5	5	5	5	5	5	3	5	5	5	5	2	0	0	1	0	5	3	5	5	2	1	3	6	5	5	5	5	5	5	5	4	5	5	5	3	4	5	5	5	4
0.672245	1	57	2070	3	1	2	1	1	1	1	1	2	1	1	3	2	2	3	3	1	0	1	0	0	2	1	2	1	2	2	1	3	1	1	1	1	1	1	2	3	2	2	4	3	7	7	6	5	6
0.672245	1	51	661	3	1	4	2	2	2	2	1	3	2	2	3	3	5	5	5	1	0	0	1	0	5	5	4	4	5	2	4	5	4	4	1	1	2	2	3	6	3	1	1	4	1	3	3	3	5
1.105	2	43	654	2	1	5	2	2	4	2	2	3	2	2	3	3	3	3	3	1	0	0	1	0	5	5	5	4	4	4	4	4	5	5	5	5	5	5	5	5	5	5	5	4	4	4	4	4	4
0.827273	1	54	5580	3	2	3	2	2	2	1	1	3	1	1	2	3	5	5	5	2	0	0	1	0	5	5	5	5	5	3	5	5	5	5	6	6	5	1	5	5	5	3	1	6	8	8	8	1	8
1.105	2	48	182	2	1	2	2	4	5	5	5	5	5	5	3	6	6	6	6	2	0	0	0	1	6	6	6	6	5	6	5	5	6	6	6	6	6	5	6	6	6	6	6	5	8	8	8	8	8
0.672245	1	53	1622	3	1	4	2	2	4	1	1	3	1	1	4	4	3	3	3	1	0	1	0	0	2	3	4	3	4	2	1	5	3	4	2	1	6	2	2	3	3	3	5	5	4	4	4	3	5
1.105	2	49	1189	2	1	4	2	5	5	1	1	1	1	1	3	2	3	3	3	2	0	0	1	0	5	5	5	5	3	3	3	3	5	5	6	6	6	6	6	6	6	6	6	6	8	8	8	8	8
0.827273	1	65	4056	3	2	5	2	3	5	2	1	4	3	3	2	2	5	5	5	1	0	0	1	0	5	5	5	5	5	5	5	5	5	5	5	6	6	1	5	5	5	6	1	5	1	1	1	1	1
0.672245	1	73	2005	3	1	5	2	1	1	1	2	5	1	2	4	5	3	3	3	1	0	0	1	0	2	3	3	3	4	3	3	4	2	3	2	1	2	3	2	3	3	3	2	3	4	4	4	5	5
1.08976	2	43	8660	2	2	2	2	1	1	2	1	5	5	1	2	4	2	6	5	2	0	0	1	0	5	5	5	5	5	3	4	5	5	6	5	2	4	1	5	5	6	2	1	6	6	7	5	4	6
0.672245	1	58	378	3	1	2	2	1	2	1	1	1	1	1	4	3	1	1	1	1	0	1	0	0	2	2	2	2	1	1	3	5	1	2	3	2	3	3	2	2	2	5	3	3	7	7	6	5	7
1.19	2	24	3801	1	1	3	2	5	1	1	1	1	1	1	5	3	3	3	3	2	0	0	1	0	3	3	5	5	3	3	3	5	3	3	6	3	3	6	2	3	2	2	2	3	4	5	4	3	4
0.827273	1	73	5172	3	2	4	2	5	4	1	1	1	1	1	4	2	2	2	2	1	0	0	1	0	2	5	3	5	3	5	3	5	3	3	4	2	1	5	2	5	3	5	4	3	5	6	2	2	6
1.08976	2	40	9013	2	2	2	2	2	4	1	1	5	5	2	2	4	5	5	5	2	0	0	1	0	5	5	5	5	5	6	6	5	5	5	5	5	1	1	6	3	5	6	1	5	1	2	1	2	2
0.827273	1	71	5145	3	2	3	2	2	1	1	1	2	1	2	5	3	3	3	3	1	0	0	1	0	2	3	5	4	2	2	3	4	2	2	3	1	1	3	2	2	2	1	1	2	6	5	5	5	7
0.983333	2	66	3503	3	1	4	2	1	5	1	1	2	1	1	3	4	3	3	3	2	0	0	1	0	5	5	5	5	5	5	5	5	5	5	5	3	2	2	5	5	5	3	1	4	8	8	8	8	8
0.983333	2	68	2133	3	1	4	2	1	5	2	2	5	5	2	3	4	5	5	4	2	0	0	1	0	5	4	5	5	5	3	3	5	5	6	6	2	6	6	5	5	5	5	6	5	8	8	8	8	8
0.672245	1	67	3145	3	1	4	2	5	5	1	1	2	2	2	3	4	3	3	3	1	0	0	1	0	2	2	5	5	2	2	2	3	3	2	2	3	3	3	2	2	2	2	4	6	8	8	3	2	8
0.672245	1	75	3911	3	1	5	2	1	5	1	5	4	1	1	1	3	5	5	5	2	0	0	1	0	5	5	5	5	4	4	3	5	5	5	6	6	6	2	5	6	5	6	1	6	8	8	8	8	8
0.827273	1	73	8214	3	2	4	2	4	2	1	1	1	1	1	3	3	2	3	3	2	0	0	0	1	3	3	3	3	4	3	4	5	6	6	6	6	6	6	6	3	3	6	6	3	5	5	3	4	5
0.672245	1	68	2007	3	1	3	2	1	6	2	2	2	2	2	3	4	2	2	2	2	0	0	1	0	4	6	5	5	6	6	6	6	5	5	5	5	5	5	6	6	6	6	6	6	8	8	8	8	5
1.19483	1	48	2022	2	1	5	1	3	1	1	2	2	1	1	3	3	3	5	5	2	0	0	1	0	3	5	5	3	5	2	2	5	6	3	6	5	1	1	3	6	3	1	1	6	4	6	1	2	6
1.09369	1	34	4320	1	2	4	2	1	1	2	1	2	2	1	4	4	2	3	5	2	0	0	0	1	2	2	3	3	2	2	2	4	3	3	3	2	3	2	2	3	2	2	3	3	3	5	5	3	4
0.672245	1	72	271	3	1	5	2	3	3	4	3	2	2	3	2	3	5	4	5	1	0	0	1	0	5	3	3	3	5	5	5	5	5	5	5	4	3	3	3	4	5	5	1	4	2	2	3	5	2
0.672245	1	58	1346	3	1	1	1	1	1	1	1	1	2	2	3	3	6	3	3	2	0	0	1	0	2	3	5	4	2	3	3	2	3	2	2	2	2	1	1	2	2	1	1	2	5	5	5	4	5
0.827273	1	75	5136	3	2	4	2	3	2	1	1	4	1	1	2	2	5	5	5	1	0	0	1	0	5	5	5	5	5	3	4	5	5	5	5	3	5	1	5	5	5	3	1	5	1	1	1	1	1
1.46638	2	65	7318	3	2	1	2	1	1	1	1	2	1	1	3	6	2	5	4	2	0	0	0	1	5	5	5	4	2	5	2	6	5	6	6	2	6	3	3	3	3	3	6	6	4	4	4	4	4
0.672245	1	70	1461	3	1	3	2	1	1	1	1	2	1	2	4	2	3	3	3	2	0	0	1	0	4	4	4	4	4	4	4	4	3	3	2	1	1	1	4	1	4	1	1	5	2	2	8	1	5
0.672245	1	74	260	3	1	4	2	1	5	2	2	2	1	1	4	2	3	3	4	1	0	0	1	0	2	3	2	3	3	3	2	4	3	2	3	2	2	3	2	2	2	3	1	2	7	7	8	7	7
0.827273	1	56	7374	3	2	4	2	1	1	1	1	2	1	1	4	4	3	4	4	1	0	0	1	0	3	3	3	3	5	3	3	5	3	2	3	3	2	3	3	3	3	2	2	3	5	5	5	5	5
1.105	2	41	273	2	1	4	2	1	1	1	2	2	2	2	4	3	3	3	3	1	0	0	1	0	3	3	4	3	3	3	6	6	3	6	6	6	6	6	6	6	6	2	2	6	8	8	8	8	8
0.827273	1	74	8209	3	2	4	2	1	1	1	1	1	1	1	5	3	2	1	2	1	0	1	0	0	2	3	2	3	2	3	3	4	2	1	2	3	3	2	1	3	2	3	5	3	6	5	6	7	7
0.827273	1	66	4085	3	2	5	2	2	5	1	1	4	1	1	1	2	6	5	5	1	0	1	0	0	6	6	6	6	1	1	1	1	2	1	6	1	3	2	1	6	2	1	1	2	4	6	4	3	4
0.983333	2	59	765	3	1	5	2	4	3	3	2	2	2	2	3	4	3	3	3	1	0	0	1	0	3	3	4	3	2	4	3	5	3	6	2	2	6	6	3	6	3	4	6	6	4	3	8	4	5
0.672245	1	55	1383	3	1	4	2	1	2	2	1	4	2	2	1	3	5	5	5	2	0	0	1	0	5	4	4	5	5	2	5	5	5	5	6	1	6	1	5	1	5	1	1	6	1	5	2	1	1
0.827273	1	70	4816	3	2	4	2	1	3	1	1	2	1	1	4	2	2	2	2	1	0	0	1	0	3	3	3	2	4	2	2	5	5	2	2	1	2	2	2	3	2	2	1	3	5	6	3	2	6
0.827273	1	57	9006	3	2	5	2	1	1	1	1	3	2	3	4	3	3	3	3	1	0	0	1	0	3	3	2	2	5	3	3	5	3	2	2	3	6	2	1	3	1	3	4	4	4	5	5	4	6
0.827273	1	60	5537	3	2	3	2	4	1	1	1	1	1	2	3	6	3	3	3	2	0	0	1	0	3	3	4	3	3	3	2	3	5	6	5	6	3	6	6	6	6	6	6	6	8	8	8	8	8
1.08976	2	45	5919	2	2	2	2	5	5	1	1	2	2	2	3	3	3	3	3	1	0	0	1	0	5	5	5	5	3	2	4	3	3	3	3	3	3	3	2	2	2	2	1	3	6	6	4	5	7
0.672245	1	61	661	3	1	2	2	1	5	1	1	1	1	1	3	3	4	4	3	2	0	0	1	0	4	5	5	4	1	1	3	4	3	3	3	3	3	2	2	2	1	2	1	3	4	4	4	3	5
0.827273	1	68	4950	3	2	5	2	2	3	1	1	2	2	1	4	4	2	4	4	1	0	1	0	0	2	4	5	3	2	1	3	5	3	2	2	1	1	4	1	3	2	2	4	3	4	5	3	5	5
1.19483	1	36	368	2	1	5	2	1	5	1	1	1	1	1	1	3	1	1	2	2	0	0	1	0	5	5	4	4	1	1	1	1	3	2	2	2	2	4	3	3	3	2	1	3	5	5	3	4	5
1.12826	2	24	5042	1	2	3	2	2	3	2	1	1	2	1	3	3	2	1	1	2	0	0	1	0	1	3	3	2	3	1	2	5	2	2	3	2	1	1	3	4	1	2	3	2	4	4	5	4	7
1.06893	1	34	566	1	1	5	2	1	1	2	1	2	1	2	3	2	2	3	2	1	0	1	0	0	1	3	2	2	2	2	2	3	2	1	2	3	1	1	2	1	1	2	2	2	5	5	7	5	5
1.12826	2	34	5036	1	2	2	3	1	4	2	2	2	2	1	4	4	4	2	3	1	0	0	0	1	2	2	3	3	3	3	3	3	3	3	3	2	3	3	3	3	3	3	3	2	4	4	4	5	5
1.06893	1	22	3125	1	1	2	1	3	3	2	3	2	2	2	3	2	2	3	3	1	1	0	0	0	2	2	2	2	3	3	4	3	2	2	2	2	2	2	2	2	2	2	2	2	4	3	6	5	4
1.09369	1	33	4070	1	2	2	2	6	3	1	1	1	1	2	3	4	3	3	3	1	0	0	1	0	3	3	3	3	6	6	3	6	3	3	6	6	3	6	3	3	3	1	3	6	4	5	4	1	4
0.672245	1	72	2067	3	1	2	2	1	5	1	1	2	2	2	4	4	2	2	2	2	0	0	1	0	3	2	3	3	2	2	3	4	3	3	2	2	1	1	1	2	2	1	1	2	8	5	8	2	5
1.19	2	19	1430	1	1	2	1	1	3	1	3	1	1	1	4	1	1	1	1	1	1	1	0	0	1	1	1	1	1	1	1	1	1	1	1	1	1	1	1	1	1	3	1	1	7	7	7	6	7
1.09369	1	18	6558	1	2	1	1	4	2	1	1	2	3	1	3	1	1	2	2	1	0	1	0	0	1	3	4	4	2	2	1	2	1	1	3	3	1	3	2	1	2	2	4	3	5	7	7	6	6
1.12826	2	29	4480	1	2	4	1	1	5	2	2	2	1	1	3	3	4	3	3	1	0	1	0	0	2	5	5	5	3	2	2	4	3	2	4	3	4	2	3	4	4	2	2	3	2	3	2	2	2
1.12826	2	27	5017	1	2	3	1	1	4	1	1	2	1	1	4	1	1	1	2	1	1	0	0	0	2	1	1	3	1	1	1	1	2	1	1	2	1	3	1	1	3	1	3	1	7	7	7	7	7
1.19	2	33	2072	1	1	3	2	1	1	1	2	2	3	2	4	3	2	2	2	2	0	0	0	1	3	3	4	4	3	2	3	4	2	2	3	2	2	4	2	3	2	4	2	3	5	6	4	5	5
1.06893	1	29	1369	1	1	5	1	2	2	1	1	2	1	1	1	1	1	1	2	1	1	0	0	0	2	1	1	3	1	1	1	3	1	2	2	2	1	1	3	1	1	2	1	1	7	7	7	7	6
1.19	2	20	3270	1	1	3	2	1	1	1	5	5	5	2	4	4	6	6	6	2	0	0	1	0	6	6	6	6	6	6	6	6	6	6	6	6	6	6	6	6	6	6	6	6	8	8	8	8	8
0.983333	2	59	3060	3	1	4	2	1	5	1	1	2	2	2	3	5	4	3	3	1	0	1	0	0	3	3	4	2	4	3	3	5	3	3	3	2	2	3	4	4	3	3	1	6	3	3	3	3	3
1.12826	2	32	7300	1	2	2	1	3	3	2	2	2	2	2	5	2	2	2	4	1	1	0	0	0	4	3	3	4	3	3	3	4	2	4	4	4	5	5	5	3	5	3	4	3	3	6	6	4	5
1.12826	2	21	5008	1	2	3	2	1	1	2	2	2	2	2	4	4	3	2	1	2	0	0	0	1	2	3	5	3	4	3	3	5	4	3	3	3	3	3	3	3	2	2	2	3	3	3	2	4	4
1.12826	2	20	5063	1	2	3	2	1	5	2	1	1	1	2	4	3	3	2	2	2	0	0	1	0	2	2	4	4	4	3	4	4	2	1	2	1	1	3	2	3	2	3	3	6	4	4	5	3	5
1.12826	2	21	5723	1	2	3	2	1	1	2	1	1	2	3	5	4	1	1	1	2	0	0	1	0	1	3	2	3	2	1	3	3	3	2	2	1	3	3	3	3	1	2	5	3	4	4	4	5	3
1.09369	1	31	6856	1	2	4	2	1	1	2	2	3	2	3	4	2	3	3	3	1	0	0	1	0	3	3	2	2	5	2	3	5	3	2	3	3	3	3	4	4	4	2	4	3	4	4	5	6	4
1.09369	1	33	4790	1	2	2	2	1	1	2	2	2	2	2	4	4	4	4	3	2	0	0	1	0	2	5	5	5	3	3	5	5	3	2	2	4	1	2	2	4	2	2	2	2	5	6	3	1	5
1.12826	2	29	9008	1	2	1	2	5	3	1	1	2	2	1	4	4	2	4	5	2	0	0	1	0	2	3	4	3	2	1	3	4	3	2	1	2	3	2	2	3	2	1	1	2	3	5	5	2	4
1.09369	1	18	5913	1	2	1	2	1	1	1	1	2	2	2	4	3	5	4	4	1	0	0	1	0	3	3	5	4	3	3	3	5	1	1	1	1	1	3	3	2	3	1	3	3	5	5	5	5	5
1.09369	1	32	8140	1	2	2	2	1	1	1	1	1	1	1	3	5	2	1	2	2	0	0	1	0	1	2	5	2	3	3	2	1	1	1	1	2	2	6	2	2	2	5	4	2	7	7	7	7	5
1.12826	2	22	4021	1	2	4	2	2	1	3	3	4	3	3	4	3	3	3	5	1	1	0	0	0	2	4	3	5	2	1	4	2	3	2	4	1	5	1	6	3	2	4	2	2	4	5	3	5	6
0.672245	1	67	1560	3	1	5	2	1	5	1	1	2	1	1	4	3	3	3	3	1	0	0	1	0	4	3	4	3	3	2	3	5	3	4	1	1	2	3	3	2	3	2	1	3	6	5	6	6	6
1.19483	1	46	3520	2	1	4	2	3	3	4	3	3	4	4	2	4	5	5	5	1	0	0	1	0	5	5	5	5	5	5	5	5	5	5	5	1	5	5	5	5	5	5	1	5	3	2	1	4	2
1.12826	2	30	5179	1	2	4	1	2	1	1	2	1	1	2	3	2	3	1	2	1	0	1	0	0	3	2	2	1	2	1	2	3	2	1	3	2	1	2	2	2	1	2	3	2	4	4	4	5	5
1.19	2	25	2030	1	1	4	2	1	1	2	1	2	1	2	3	2	1	2	2	2	0	0	1	0	2	2	4	4	1	2	2	2	3	2	4	2	1	2	2	3	2	2	6	2	5	4	5	4	3
1.19	2	28	3018	1	1	3	2	1	6	2	3	2	2	2	7	2	2	2	2	2	0	0	0	1	2	2	2	3	2	2	2	2	3	2	2	2	2	2	2	2	2	2	2	3	5	4	4	4	5
1.12826	2	31	7340	1	2	4	2	1	1	1	1	5	1	1	2	2	5	5	5	2	0	0	1	0	2	2	4	4	1	1	4	1	1	3	1	5	2	4	2	4	5	1	1	2	7	7	5	5	3
1.09369	1	27	4083	1	2	4	2	1	1	1	1	1	1	1	2	3	1	1	1	1	0	0	1	0	1	1	1	1	4	4	1	4	2	2	2	2	2	1	2	3	3	2	2	3	4	4	5	4	3
1.19	2	24	2316	1	1	3	2	1	5	4	4	4	4	4	4	4	5	5	4	2	0	0	1	0	1	1	6	3	2	2	2	3	6	2	6	6	6	6	2	5	3	5	4	6	4	5	8	5	5
1.06893	1	31	2834	1	1	2	2	1	2	1	1	2	2	2	3	3	2	2	4	1	0	1	0	0	2	1	2	1	3	3	3	3	2	1	2	1	2	4	3	2	2	2	1	3	6	6	5	4	7
1.09369	1	22	5009	1	2	3	2	6	4	2	2	5	2	2	4	3	4	4	4	1	0	0	1	0	4	3	4	3	4	3	3	4	1	1	1	1	3	3	6	6	6	6	2	6	8	8	8	8	8
0.827273	1	73	6516	3	2	3	2	1	1	1	2	2	2	2	3	4	3	3	3	2	0	0	1	0	4	5	4	4	5	6	6	6	3	6	3	3	6	2	3	4	3	3	1	6	8	8	8	8	8
1.12826	2	18	9015	1	2	3	2	1	2	2	1	1	2	2	3	4	6	6	6	2	0	0	1	0	6	6	6	6	6	6	6	6	6	6	6	5	3	1	6	6	6	6	6	4	1	1	1	1	1
1.09369	1	31	9024	1	2	2	3	1	4	1	1	1	1	1	4	3	2	2	3	1	0	0	1	0	2	2	5	3	4	4	1	2	2	2	1	3	3	3	4	3	1	1	1	2	4	5	3	5	5
1.12826	2	30	5232	1	2	5	2	3	1	1	1	2	1	2	4	3	2	2	2	1	0	1	0	0	1	5	5	5	3	2	2	3	2	4	3	3	3	3	1	5	2	2	2	6	4	5	4	2	2
1.06893	1	24	1763	1	1	4	2	3	5	1	1	1	1	1	4	1	1	1	1	2	1	1	0	0	1	1	1	1	1	1	1	1	1	1	1	1	1	1	1	1	1	1	1	1	7	7	7	7	7
0	1	20	#NULL!	1	#NULL!	1	1	1	2	1	1	1	1	4	7	2	1	1	1	1	1	1	0	0	1	6	1	1	2	1	2	2	1	1	1	1	1	1	1	1	1	1	1	1	5	6	3	3	3
1.08976	2	41	4628	2	2	4	2	1	1	4	5	2	5	5	3	5	6	6	6	2	0	0	1	0	4	3	5	5	3	3	3	4	5	3	5	6	6	6	3	3	3	2	1	6	8	8	8	8	8
1.06893	1	21	1243	1	1	1	3	6	4	1	1	1	1	1	7	6	6	6	6	2	0	0	0	1	6	6	6	6	6	6	6	6	6	6	6	6	6	6	6	6	6	6	6	6	8	8	8	8	8
1.06893	1	32	458	1	1	3	1	1	2	2	1	1	1	1	3	2	1	2	3	1	1	0	0	0	3	1	1	1	1	1	3	3	2	1	2	1	1	2	1	1	2	1	1	1	6	5	6	6	7
1.12826	2	21	8009	1	2	2	2	2	5	1	2	2	2	1	1	3	2	2	3	2	0	1	0	0	1	3	2	3	2	2	3	2	2	2	2	3	3	3	2	2	1	2	2	2	3	4	4	3	4
1.12826	2	30	4056	1	2	4	2	2	5	2	2	2	2	2	4	3	2	2	2	2	0	0	1	0	4	3	2	4	2	3	2	2	2	2	2	2	2	2	2	2	2	2	2	2	4	6	6	3	5
1.19	2	32	962	1	1	4	1	1	1	1	1	1	2	2	4	2	2	1	1	1	0	1	0	0	2	3	1	1	2	1	1	3	2	1	2	1	3	1	2	1	1	2	3	1	6	6	6	7	7
1.09369	1	32	9800	1	2	3	1	2	2	3	2	4	2	3	3	2	2	3	1	1	0	0	1	0	1	3	3	6	1	2	3	2	3	5	3	2	2	3	3	2	1	2	5	2	4	4	4	4	5
1.19	2	18	3748	1	1	1	1	5	5	1	1	2	1	1	4	3	2	2	2	2	0	1	0	0	1	5	4	5	2	2	2	2	3	2	2	3	3	4	2	4	6	4	4	2	7	6	4	6	7
1.46638	2	71	7055	3	2	5	2	3	1	2	1	2	2	2	3	4	3	4	4	2	0	0	1	0	4	5	2	2	5	4	4	5	4	4	5	2	2	3	5	3	3	2	1	6	4	5	4	7	5
1.12826	2	34	4844	1	2	2	2	1	5	1	1	3	1	1	3	3	3	3	3	2	0	0	1	0	3	3	3	6	6	6	6	6	6	6	6	6	6	6	6	6	6	6	6	6	7	7	7	7	7
1.09369	1	18	4580	1	2	3	3	1	5	2	2	1	4	4	4	3	3	1	1	1	0	1	0	0	1	1	5	1	1	1	2	6	1	1	1	3	1	3	1	2	1	2	4	2	5	6	7	3	7
1.19	2	32	962	1	1	4	1	1	1	2	1	1	3	2	1	2	2	3	2	1	0	0	0	1	1	1	2	2	3	1	1	2	2	1	3	1	1	1	2	1	3	2	1	2	7	6	7	6	6
1.09369	1	20	5650	1	2	4	1	2	1	1	2	2	2	2	3	2	3	3	3	1	0	0	1	0	2	3	3	3	3	3	3	3	3	3	2	2	3	2	3	3	3	3	3	3	4	4	4	4	4
1.06893	1	25	587	1	1	4	1	2	1	1	1	1	3	3	2	2	1	1	3	2	1	1	0	0	2	1	1	1	1	1	1	1	2	2	1	3	4	1	1	1	2	1	2	3	5	7	6	2	7
1.06893	1	31	1811	1	1	3	1	1	4	3	5	3	1	2	2	2	1	5	3	1	0	1	0	0	2	2	5	3	2	2	4	4	2	4	1	5	3	2	5	3	2	3	2	2	5	3	6	5	3
1.12826	2	26	7048	1	2	4	2	1	2	1	1	2	1	1	4	2	2	2	2	1	0	1	0	0	1	1	2	2	2	1	1	3	1	1	2	3	2	3	1	2	1	2	4	2	7	7	6	6	7
1.06893	1	28	3121	1	1	2	3	1	5	1	1	1	2	2	4	3	1	2	3	1	0	1	0	0	2	3	4	3	3	3	2	3	3	1	2	4	1	2	1	1	1	3	2	3	4	3	4	7	3
1.19	2	31	2614	1	1	4	1	1	1	1	1	2	1	1	3	2	3	3	3	2	0	0	1	0	6	6	6	6	4	1	1	6	3	2	6	6	6	6	3	4	3	1	3	2	8	8	8	8	8
1.12826	2	25	9300	1	2	5	1	3	2	2	1	1	3	1	2	2	1	4	3	1	1	1	0	0	3	2	1	2	1	3	4	2	2	2	1	4	5	2	2	2	3	4	3	3	3	5	5	5	6
0.827273	1	75	4083	3	2	4	2	2	3	1	1	2	1	1	2	3	6	6	6	2	0	0	1	0	6	6	6	6	6	6	6	6	6	6	6	6	6	6	6	6	6	6	6	6	8	8	8	8	8
1.09369	1	21	8009	1	2	4	2	1	5	2	2	2	2	2	4	2	3	3	3	1	0	0	1	0	3	2	3	2	3	3	3	3	3	3	3	3	3	3	3	3	3	3	3	3	5	5	5	5	5
1.06893	1	18	3113	1	1	1	2	1	5	1	2	5	2	2	4	4	4	4	4	1	0	0	1	0	5	4	4	3	3	3	3	5	3	6	6	2	2	6	2	4	2	4	5	6	4	4	6	7	5
1.19	2	32	962	1	1	4	1	1	1	1	2	1	2	2	3	2	2	1	1	1	1	0	0	0	2	1	2	1	3	2	1	2	4	1	1	2	1	1	1	2	1	1	2	2	6	6	6	7	7
1.18171	1	41	6770	2	2	3	2	5	4	1	2	3	3	2	3	4	3	5	5	1	0	0	1	0	5	5	5	5	5	6	6	5	5	4	6	2	6	2	5	6	6	2	1	5	1	1	1	1	1
0.672245	1	74	1415	3	1	4	2	6	5	2	2	3	1	2	3	3	3	3	3	2	0	0	1	0	4	4	4	4	3	4	3	4	5	4	4	4	2	2	4	4	4	3	1	4	3	3	3	3	3
1.08976	2	38	4620	2	2	4	2	1	5	1	1	1	1	1	4	6	2	2	2	1	0	0	0	1	1	1	2	6	2	1	1	1	6	1	6	6	6	6	2	6	6	6	5	6	6	8	8	8	6
1.19	2	34	1542	1	1	1	2	5	5	1	2	2	1	1	4	3	2	3	3	2	0	0	0	1	2	3	4	3	2	1	2	4	3	2	3	3	3	3	4	3	1	1	4	2	5	4	4	5	4
1.19	2	23	3512	1	1	4	1	1	1	1	2	2	1	1	3	3	2	2	3	1	0	1	0	0	2	2	3	2	1	2	2	3	3	2	3	2	3	2	3	3	1	1	1	2	6	5	5	3	4
1.12826	2	21	4024	1	2	4	1	1	2	2	2	3	2	3	3	2	3	4	2	1	0	1	0	0	3	4	2	3	5	3	4	2	2	3	4	5	2	2	2	4	3	4	5	2	5	4	4	5	6
1.12826	2	33	4640	1	2	2	2	5	1	1	1	2	1	1	4	4	3	4	4	1	0	1	0	0	1	2	3	5	1	1	1	3	3	4	2	2	2	1	2	3	1	3	2	6	4	5	5	4	4
1.12826	2	22	7012	1	2	1	2	1	1	5	5	5	5	5	7	6	6	6	6	2	0	0	0	1	6	6	6	6	6	6	6	6	6	6	6	6	6	6	6	6	6	6	6	6	8	8	8	8	8
1.19	2	20	3921	1	1	4	2	2	5	2	2	2	2	2	2	2	3	3	2	1	1	0	0	0	5	2	3	2	2	3	4	4	2	2	4	3	2	2	3	2	2	2	6	2	5	5	2	3	7
0	2	20	#NULL!	1	#NULL!	4	1	2	3	1	1	1	1	1	4	6	1	2	3	2	0	0	0	1	2	3	6	6	6	6	6	6	6	6	3	6	6	6	4	4	3	2	2	6	4	7	5	6	5
1.09369	1	34	5073	1	2	4	2	1	2	2	5	5	2	5	3	4	2	2	3	1	0	0	1	0	3	3	3	3	3	3	3	5	3	2	3	3	2	2	2	3	2	3	3	3	3	4	3	3	4
0	2	28	#NULL!	1	#NULL!	2	1	1	1	3	3	2	2	1	4	4	3	3	3	1	0	1	0	0	4	2	2	3	2	2	2	1	3	3	1	2	3	3	3	4	3	3	2	2	5	3	7	3	5
0.672245	1	67	2833	3	1	3	2	3	3	1	2	3	1	3	3	3	3	5	5	2	0	0	1	0	5	4	4	2	2	3	3	4	3	2	2	2	4	1	3	3	2	1	1	3	5	5	4	4	5
1.19	2	33	160	1	1	5	1	1	2	1	1	1	1	1	1	1	5	1	1	1	1	0	0	0	1	1	1	1	1	1	1	1	1	1	1	1	1	1	1	1	1	1	1	2	7	7	7	7	7
0	1	25	#NULL!	1	#NULL!	4	2	2	3	1	1	1	1	2	3	3	1	2	2	2	0	0	1	0	1	3	1	1	1	1	1	1	1	1	1	1	1	1	1	1	1	1	1	3	5	5	5	7	7
0	2	24	#NULL!	1	#NULL!	2	1	1	3	1	2	2	2	4	5	4	3	2	3	1	0	0	1	0	5	5	5	5	4	2	2	5	5	5	4	4	4	3	4	4	3	4	6	4	4	5	4	5	5
1.09369	1	25	5505	1	2	2	1	3	3	1	1	1	1	1	2	1	1	1	1	1	1	0	0	0	1	1	1	1	1	1	1	1	1	1	1	1	1	1	1	1	1	1	1	1	7	7	7	7	7
1.12826	2	19	5302	1	2	4	2	1	1	2	1	1	1	1	3	3	2	4	3	2	0	0	1	0	2	4	2	3	6	5	5	2	3	2	1	5	4	4	2	6	2	4	4	3	5	5	5	5	6
1.06893	1	20	674	1	1	4	1	2	1	1	1	1	1	1	4	2	1	1	1	1	1	1	0	0	1	1	1	1	1	1	1	1	1	1	1	1	1	1	1	1	1	1	1	2	7	7	7	7	7
1.18171	1	47	4056	2	2	4	2	4	4	2	1	4	2	2	2	3	1	1	1	2	0	0	1	0	5	5	5	5	4	4	5	5	5	5	5	3	5	6	5	5	5	6	5	5	8	8	8	8	8
1.09369	1	29	5183	1	2	3	1	1	1	2	1	3	2	1	1	1	1	2	2	1	1	0	0	0	2	5	3	3	1	1	1	3	1	2	2	1	1	2	2	2	2	3	1	1	2	5	4	3	7
1.18171	1	46	8026	2	2	5	2	2	5	1	1	1	1	1	2	3	5	5	5	1	0	0	1	0	5	5	5	5	5	5	5	5	3	3	3	3	3	3	3	3	3	3	3	2	2	3	2	1	2
1.09369	1	24	6969	1	2	4	1	1	2	2	1	2	1	2	2	2	3	3	2	1	1	0	0	0	1	2	2	2	1	2	3	3	2	3	1	1	2	2	1	2	3	3	3	2	5	5	4	6	4
1.09369	1	25	4365	1	2	3	1	1	4	3	3	3	2	3	5	2	2	2	4	1	1	0	0	0	2	2	2	2	2	2	2	2	2	1	1	1	1	3	1	1	1	1	1	1	2	2	2	2	2
0.827273	1	61	7051	3	2	5	2	1	2	1	2	2	1	1	4	4	3	3	3	1	0	0	1	0	3	3	2	2	3	3	3	5	3	2	2	1	2	3	2	4	3	5	3	6	5	6	4	6	6
1.09369	1	20	7725	1	2	3	1	2	2	1	1	1	1	1	3	1	1	1	1	1	1	0	0	0	3	2	1	2	2	1	3	3	1	2	5	4	4	4	3	1	1	1	3	2	3	5	6	5	4
1.06893	1	18	2020	1	1	3	2	1	5	1	1	2	3	2	4	1	1	2	3	2	0	1	0	0	1	1	2	2	3	3	1	2	1	1	2	1	2	3	2	3	2	4	5	2	5	3	4	7	7
1.12826	2	19	7710	1	2	1	2	1	5	2	2	2	2	2	3	3	5	4	4	2	0	0	1	0	4	4	4	4	5	5	5	5	4	4	4	4	5	5	5	5	5	5	5	4	3	3	4	3	3
0	2	34	#NULL!	1	#NULL!	5	1	2	6	1	1	1	1	1	2	1	2	2	2	1	0	1	0	0	3	3	3	3	2	1	2	6	3	3	3	3	3	3	3	3	3	6	6	3	4	4	4	4	4
0.672245	1	66	2420	3	1	4	2	5	5	1	1	4	1	2	1	2	5	5	5	2	0	0	1	0	5	5	5	5	5	3	3	5	5	4	6	6	6	6	6	5	6	6	6	6	8	8	8	8	8
1.12826	2	21	6856	1	2	3	2	1	5	1	5	5	5	3	4	2	3	6	2	2	0	0	1	0	2	2	6	6	3	2	3	5	3	2	6	6	6	6	2	6	3	6	3	6	4	3	3	3	3
1.09369	1	20	5936	1	2	4	1	2	1	2	2	3	1	2	2	2	2	3	1	1	0	1	0	0	2	1	1	2	2	1	2	3	2	1	3	2	1	2	2	2	1	2	1	2	4	4	6	5	5
1.09369	1	21	8888	1	2	3	3	5	5	5	5	5	5	5	1	5	6	6	6	2	0	0	0	1	6	6	6	6	6	6	6	6	6	6	6	6	6	6	6	6	6	6	6	6	1	1	1	1	1
1.06893	1	33	864	1	1	5	2	2	5	2	1	1	2	4	5	2	2	2	1	1	1	1	0	0	2	3	4	3	3	3	2	4	2	2	3	2	2	3	2	2	2	3	2	2	4	4	5	1	4
1.09369	1	31	4865	1	2	3	1	2	2	3	3	3	1	1	3	3	1	1	3	1	0	1	0	0	4	2	6	3	4	6	1	3	5	4	2	1	5	6	5	4	2	3	1	3	5	6	2	3	4
0.827273	1	70	6796	3	2	2	2	5	5	1	1	4	1	1	1	1	3	3	5	2	0	0	0	1	6	6	5	5	3	1	2	3	6	6	6	6	5	1	3	3	3	1	1	6	8	8	8	8	8
1.09369	1	28	8008	1	2	3	1	1	4	1	1	1	1	1	2	2	3	2	3	1	1	1	0	0	1	1	2	1	2	2	2	2	3	3	4	1	2	1	2	2	2	2	4	2	6	5	6	5	3
1.09369	1	28	7713	1	2	5	1	4	3	2	1	3	1	1	4	2	2	2	3	1	1	0	0	0	1	1	2	2	2	1	1	1	1	2	1	1	1	3	1	1	2	2	2	2	7	6	5	7	5
1.19	2	20	672	1	1	3	2	1	5	2	2	1	2	2	4	3	2	2	2	2	0	0	1	0	2	2	3	4	4	2	2	2	2	2	2	1	2	2	3	2	3	2	2	3	4	4	5	5	6
1.19	2	20	2822	1	1	1	2	1	5	2	1	2	5	5	3	3	3	3	3	2	0	0	1	0	2	3	3	4	2	4	6	6	3	2	6	2	3	3	2	2	1	2	4	6	4	3	8	4	2
1.06893	1	18	3025	1	1	2	2	1	5	2	3	2	3	2	2	4	3	3	3	2	0	0	1	0	3	3	1	3	3	3	3	3	3	3	3	3	3	3	3	3	3	3	3	3	4	4	4	4	4
0.672245	1	71	3515	3	1	3	2	6	1	1	1	2	2	2	4	3	3	3	4	2	0	0	1	0	4	3	4	3	3	2	3	6	3	3	3	2	2	2	3	2	2	2	2	3	4	4	4	4	4
1.06893	1	25	1364	1	1	5	2	2	2	1	3	1	3	3	4	2	2	1	1	2	0	0	1	0	3	2	2	2	5	2	2	5	3	3	3	3	3	3	3	3	3	3	3	2	7	7	7	7	7
1.12826	2	27	4630	1	2	5	1	2	4	1	1	1	1	1	3	3	1	1	2	1	0	1	0	0	2	2	3	3	1	1	1	2	2	1	1	2	2	2	1	2	1	2	4	2	5	5	4	4	5
1.19	2	30	486	1	1	3	1	1	1	3	2	3	3	2	3	3	4	4	4	2	0	0	0	1	6	5	5	5	6	6	6	6	5	5	5	5	5	5	4	5	5	5	4	4	8	8	8	8	8
1.18171	1	35	6869	2	2	4	2	1	1	1	1	2	1	2	4	4	3	3	3	1	0	1	0	0	2	4	4	4	5	3	3	5	3	2	2	1	3	3	6	6	2	6	6	4	5	5	5	5	5
1.06893	1	28	591	1	1	5	2	1	5	2	2	3	1	2	5	3	3	3	3	1	0	0	1	0	3	3	2	2	3	2	2	4	3	2	3	2	1	2	2	3	2	3	1	2	4	4	4	5	5
1.09369	1	30	5034	1	2	3	2	1	1	2	2	4	2	2	4	3	3	3	3	1	0	0	1	0	4	4	4	4	4	4	4	4	4	4	4	4	4	4	4	4	4	4	4	3	5	5	3	4	7
1.09369	1	33	4019	1	2	4	1	4	4	2	3	3	3	3	5	4	3	2	2	1	0	1	0	0	2	3	4	2	3	3	4	3	3	4	4	3	3	3	2	3	4	4	3	4	4	4	5	5	4
1.09369	1	22	7046	1	2	2	1	1	2	2	3	1	3	5	2	2	4	5	5	2	0	0	1	0	5	5	5	5	2	2	3	1	3	2	1	1	2	4	3	1	4	2	5	5	1	1	1	1	1
1.12826	2	23	7050	1	2	4	2	1	1	1	2	2	5	2	5	3	3	2	3	2	0	0	0	1	3	3	3	3	3	3	2	3	3	3	3	2	3	2	3	2	3	3	3	3	5	5	4	5	5
1.06893	1	29	3475	1	1	1	1	1	6	1	1	3	3	2	7	1	2	4	1	2	0	0	0	1	1	1	2	5	1	3	1	3	3	2	3	5	3	5	6	3	2	2	1	3	4	5	6	2	4
1.09369	1	20	5938	1	2	2	2	1	1	3	3	2	1	2	4	3	4	4	5	2	0	0	1	0	4	5	4	4	2	3	3	5	5	4	3	3	4	5	4	3	5	4	3	3	4	4	4	6	5
1.09369	1	18	7288	1	2	4	1	1	4	4	4	3	4	4	3	3	2	2	2	1	0	1	0	0	5	3	3	3	1	1	3	1	3	3	1	3	1	1	1	1	1	1	3	1	8	8	8	8	8
1.06893	1	22	3036	1	1	5	3	4	5	4	3	5	1	3	4	3	3	3	1	2	0	0	0	1	1	1	3	2	3	3	1	3	4	5	1	1	2	4	5	6	5	2	2	3	2	3	5	4	7
1.09369	1	22	6014	1	2	2	1	2	1	1	1	5	2	2	3	1	2	3	3	2	1	0	0	0	2	1	3	1	1	1	1	2	1	3	3	3	1	1	1	4	1	2	2	2	5	5	5	3	6
1.09369	1	26	4879	1	2	3	2	4	5	2	1	5	1	1	4	3	5	5	5	1	0	0	1	0	5	5	5	4	1	1	6	5	2	3	6	6	2	4	5	4	4	2	1	4	3	4	5	4	7
1.12826	2	29	5636	1	2	2	2	5	5	1	1	1	1	1	6	3	5	5	5	2	0	0	1	0	5	5	5	5	3	1	1	5	3	3	4	3	2	2	4	3	2	2	2	6	8	8	8	8	8
1.06893	1	31	1811	1	1	3	1	3	4	1	2	1	2	1	3	3	2	3	2	1	0	1	0	0	4	3	2	3	4	3	2	2	3	2	2	1	4	3	4	3	2	3	1	2	3	4	6	6	6
1.08976	2	49	6856	2	2	4	2	2	1	1	2	3	2	2	3	6	3	3	2	2	0	0	1	0	6	6	6	6	4	3	6	5	4	4	6	1	6	3	6	6	6	2	6	4	4	5	3	4	5
1.09369	1	18	5305	1	2	2	2	1	5	1	4	1	1	2	4	2	5	4	2	1	0	0	1	0	1	2	5	5	2	1	1	1	3	2	3	6	2	2	3	2	2	2	2	2	7	5	2	7	7
1.09369	1	18	6631	1	2	2	1	1	5	1	1	1	1	1	3	2	2	2	2	1	0	1	0	0	1	1	2	2	1	1	3	5	2	1	1	3	3	1	1	5	4	2	3	2	7	7	6	7	7
1.12826	2	34	5392	1	2	4	2	1	1	1	1	3	1	2	3	3	2	2	2	2	0	0	1	0	2	2	4	2	2	2	2	4	3	2	3	4	2	3	2	4	3	2	4	2	6	5	4	4	6
1.19	2	20	2365	1	1	5	1	3	1	1	1	1	1	1	2	2	1	1	1	1	1	0	0	0	1	1	1	1	1	1	1	1	1	1	1	1	1	1	1	1	1	1	1	2	2	5	3	4	3
0.827273	1	70	4865	3	2	5	2	2	2	3	1	1	1	1	3	3	1	2	2	2	0	0	1	0	2	2	3	2	1	1	3	2	3	1	1	2	4	1	4	3	1	2	2	3	4	5	4	6	4
1.06893	1	34	2150	1	1	5	2	3	4	1	2	3	2	1	4	4	2	4	5	1	0	1	0	0	1	4	5	5	4	1	3	4	2	6	2	1	3	2	1	3	3	2	1	6	3	2	6	5	3
1.06893	1	22	3015	1	1	5	1	1	5	2	1	1	1	2	3	3	2	2	1	2	1	0	0	0	1	2	2	5	3	4	4	2	6	4	3	1	6	5	3	2	2	4	4	4	5	3	2	7	4
1.09369	1	18	6631	1	2	2	1	1	5	1	1	1	1	1	3	2	1	1	3	1	0	1	0	0	1	1	2	2	1	1	3	5	1	1	1	3	3	1	1	4	4	2	3	2	7	7	6	7	7
0.827273	1	60	4980	3	2	3	2	5	1	1	1	1	1	3	4	4	3	3	3	1	0	0	1	0	2	3	3	3	4	4	6	4	3	3	6	3	6	3	3	5	3	3	6	6	8	5	8	8	8
1.06893	1	26	3275	1	1	2	2	1	5	1	1	2	2	2	6	5	5	5	5	1	0	0	1	0	3	3	5	3	3	3	2	5	4	6	1	1	2	4	2	5	5	1	1	5	2	3	2	6	6
1.09369	1	20	8515	1	2	2	2	1	5	2	3	3	5	1	7	6	6	6	6	2	0	0	0	1	6	6	6	6	6	5	6	6	6	6	6	6	6	6	6	6	6	6	6	6	3	5	4	3	4
0	1	22	#NULL!	1	#NULL!	4	2	5	5	2	2	1	2	5	4	3	2	2	3	1	0	1	0	0	3	4	4	6	3	3	3	2	3	2	2	2	6	2	3	2	2	2	6	3	4	4	4	4	8
1.105	2	38	3218	2	1	4	2	6	1	1	1	2	2	2	5	4	4	4	4	1	0	1	0	0	4	1	4	3	2	2	1	2	1	2	3	2	2	2	6	6	2	6	6	6	4	4	4	4	5
1.06893	1	31	1150	1	1	4	2	5	5	2	2	3	3	4	3	4	5	4	4	2	0	0	1	0	5	4	4	5	5	5	3	5	5	5	6	5	5	5	5	5	5	3	5	6	8	8	8	8	8
0.672245	1	56	685	3	1	1	2	4	1	2	1	2	1	2	2	2	5	5	5	2	0	0	1	0	5	5	5	5	5	4	4	5	5	5	5	5	5	5	5	5	5	5	1	4	1	1	1	3	1
1.19483	1	40	482	2	1	4	2	2	5	1	2	5	1	1	4	3	6	4	5	1	0	0	1	0	4	4	6	3	5	3	3	5	6	6	6	6	6	6	2	6	6	6	6	6	6	6	5	6	6
1.09369	1	29	5183	1	2	3	2	2	1	3	1	3	2	3	2	1	5	2	3	1	1	0	0	0	3	2	3	2	1	2	2	3	3	2	2	4	4	4	2	4	2	4	2	3	7	8	3	2	3
1.06893	1	27	2318	1	1	4	2	5	5	1	1	1	1	1	5	3	3	3	3	1	0	1	0	0	3	5	5	5	5	2	2	5	3	5	2	3	3	6	1	3	3	3	3	1	7	7	4	3	7
1.06893	1	31	2834	1	1	2	2	1	2	1	1	2	2	2	3	3	2	2	4	1	0	1	0	0	2	2	4	1	3	2	2	3	1	1	2	1	2	4	3	2	1	2	1	2	7	7	5	4	7
1.06893	1	21	2353	1	1	5	1	3	1	2	3	1	1	3	1	1	1	3	2	1	0	0	1	0	3	1	3	2	1	2	3	5	2	1	5	3	2	3	3	5	2	1	2	3	7	7	1	5	4
1.09369	1	34	8680	1	2	3	2	5	5	2	2	3	2	2	1	2	4	4	4	1	0	0	1	0	4	4	4	4	4	4	4	4	6	3	6	3	3	3	3	4	4	3	2	4	3	3	4	4	4
1.06893	1	18	4	1	1	1	3	6	6	5	5	5	5	5	7	6	6	6	6	2	0	0	0	1	6	6	6	6	6	6	6	6	6	6	6	6	6	6	6	6	6	6	6	6	1	1	1	1	1
1.06893	1	31	2834	1	1	2	2	1	2	1	1	2	2	2	3	3	2	2	4	1	0	1	0	0	1	1	4	1	3	2	2	3	1	1	2	2	2	4	3	2	2	1	1	2	7	7	5	3	7
1.06893	1	21	2523	1	1	5	1	3	1	1	3	4	1	4	1	3	3	3	1	2	0	0	1	0	2	6	3	1	3	3	2	1	1	4	2	3	1	6	4	3	2	1	1	3	7	1	4	7	7
0.983333	2	65	2480	3	1	2	2	5	5	1	1	2	1	1	4	3	3	3	3	2	0	0	0	1	3	3	3	3	6	2	6	5	5	3	6	6	6	6	6	6	6	6	6	6	8	8	8	8	8
1.09369	1	25	4548	1	2	4	1	1	1	4	2	2	1	2	2	3	4	5	3	1	1	0	0	0	2	2	1	4	3	4	4	4	3	3	3	3	1	1	1	4	1	3	5	5	3	3	3	3	3
0.827273	1	70	5379	3	2	4	2	1	1	1	2	2	1	2	4	3	4	3	4	2	0	0	0	1	4	3	4	5	4	3	6	5	4	4	6	6	6	3	6	6	6	6	5	6	8	5	8	3	5
1.06893	1	31	2834	1	1	2	2	1	2	1	1	2	2	2	3	3	1	1	3	1	0	1	0	0	2	1	4	1	3	1	1	3	1	1	3	2	2	4	3	3	2	2	2	2	7	7	5	4	7
1.06893	1	20	1985	1	1	1	2	6	5	5	1	5	2	2	5	1	3	6	3	1	1	0	0	0	5	4	2	2	4	2	2	5	1	1	4	5	3	1	4	1	4	6	1	2	2	7	3	6	4
1.09369	1	20	5523	1	2	3	1	3	1	1	2	1	3	2	3	2	2	1	3	1	1	0	0	0	2	2	2	1	2	3	3	2	2	3	4	2	1	2	2	2	3	4	2	3	5	4	6	6	4
1.06893	1	30	424	1	1	5	2	4	2	2	3	2	1	1	4	3	2	3	3	2	0	0	0	1	2	3	3	4	3	3	4	5	4	3	4	4	3	4	6	6	4	6	2	3	3	4	3	8	4
1.06893	1	28	484	1	1	5	1	2	3	1	1	2	1	3	3	2	3	3	1	2	0	0	1	0	4	1	6	2	1	3	1	4	2	3	4	2	3	1	2	2	6	1	4	5	5	5	6	6	5
1.09369	1	18	7340	1	2	2	2	1	5	2	2	3	1	5	2	3	1	2	3	1	0	0	1	0	2	2	3	1	3	3	2	2	3	3	2	2	3	2	2	3	3	3	3	1	4	5	4	5	5
1.09369	1	29	8534	1	2	4	2	4	3	1	1	3	2	2	4	4	2	3	4	1	0	1	0	0	3	2	3	5	2	1	3	2	1	2	1	2	3	2	1	4	2	3	2	3	4	5	5	3	4
1.06893	1	20	3016	1	1	2	1	1	1	1	1	2	1	1	4	3	6	2	2	1	0	1	0	0	2	3	4	1	2	3	3	6	2	1	1	2	1	3	1	4	2	1	4	1	5	6	5	6	4
1.06893	1	19	456	1	1	1	2	6	5	2	1	1	1	3	3	4	5	3	5	1	0	0	1	0	2	2	5	5	5	4	2	3	2	1	1	4	5	2	3	4	4	1	1	2	3	5	5	3	3
1.06893	1	29	169	1	1	5	1	1	5	3	1	1	2	3	1	1	1	1	1	1	0	1	0	0	2	2	2	1	2	2	1	3	1	2	1	3	2	1	4	1	2	4	1	2	5	6	3	5	4
1.09369	1	33	4027	1	2	4	2	2	4	1	1	2	2	1	4	3	2	2	2	1	0	1	0	0	2	2	4	3	2	2	2	3	1	2	4	2	2	3	2	6	2	2	3	2	6	5	7	6	6
1.09369	1	32	6600	1	2	2	2	1	3	1	1	5	5	5	1	5	5	5	5	2	0	0	1	0	5	5	5	5	5	4	3	5	6	6	6	6	6	6	5	3	3	1	1	6	1	1	1	1	1
1.19	2	33	1414	1	1	5	2	1	1	1	1	2	1	2	3	4	3	3	3	2	0	0	0	1	3	2	6	6	2	2	2	3	3	6	3	6	2	2	6	6	2	5	4	3	5	6	5	4	7
0.672245	1	66	1410	3	1	4	2	1	5	1	1	1	2	1	5	3	1	2	2	2	0	0	1	0	2	2	2	2	3	1	1	5	1	1	4	2	4	1	1	3	2	2	4	2	5	5	4	4	5
1.06893	1	20	3804	1	1	3	2	1	5	1	2	1	3	4	3	4	5	5	4	1	0	0	1	0	3	2	3	2	3	2	6	5	1	2	2	1	3	6	1	4	2	1	1	6	5	6	6	5	7
0	1	22	#NULL!	1	#NULL!	5	2	2	2	2	2	2	3	3	2	3	3	3	3	2	0	0	0	1	5	3	1	1	2	4	5	4	4	5	1	5	4	4	2	5	3	4	3	3	2	5	2	2	2
1.06893	1	18	1819	1	1	4	3	4	4	1	2	3	3	5	2	5	5	2	2	2	0	0	1	0	5	3	1	2	4	4	2	4	5	3	3	2	4	4	6	6	6	6	6	6	7	7	7	7	7
1.06893	1	27	1262	1	1	2	1	1	5	1	2	2	1	5	4	1	3	6	4	2	0	0	0	1	3	2	4	6	4	1	3	5	3	2	3	2	3	1	1	2	3	4	1	3	6	6	4	3	4
1.08976	2	40	5172	2	2	5	2	1	1	2	2	2	2	5	3	5	5	5	5	2	0	0	1	0	5	5	5	5	5	3	3	5	5	6	6	6	6	6	4	5	5	6	5	6	8	8	8	8	8
1.46638	2	56	7014	3	2	5	2	1	5	1	5	1	1	2	5	2	2	2	1	1	0	0	1	0	3	3	3	3	3	4	2	5	2	6	3	1	6	3	6	6	6	4	5	6	2	2	8	8	8
1.18171	1	48	4023	2	2	5	2	1	5	1	1	1	2	1	4	6	2	2	2	2	0	0	1	0	2	3	5	5	2	2	3	4	6	6	6	1	6	6	6	6	2	6	6	6	8	8	8	8	8
0.827273	1	56	4200	3	2	4	2	1	2	1	1	2	1	1	4	2	1	2	2	1	0	0	1	0	3	3	2	2	5	5	3	5	2	2	1	2	2	4	1	2	1	3	4	4	6	6	4	4	7
0	1	25	#NULL!	1	#NULL!	4	3	6	6	1	1	3	2	2	3	3	4	4	4	2	0	0	1	0	4	3	3	3	3	2	2	4	4	6	4	6	6	6	6	3	3	4	3	3	8	8	8	5	6
0.827273	1	69	6293	3	2	2	1	1	5	1	2	3	1	2	4	2	6	3	3	1	0	0	1	0	4	4	3	2	4	3	3	4	5	4	4	4	5	1	1	3	2	6	5	6	6	6	2	2	6
0.827273	1	53	5360	3	2	2	2	1	5	2	2	2	2	2	3	3	4	4	4	1	0	0	1	0	4	4	4	4	4	4	4	5	4	3	3	2	3	3	3	3	3	2	2	6	4	4	4	4	5
1.09369	1	24	5099	1	2	3	2	4	2	1	1	1	2	2	4	3	3	3	3	1	0	0	1	0	2	3	3	3	2	2	2	3	3	2	2	3	2	1	2	3	2	3	3	3	6	6	5	5	5
0	1	19	#NULL!	1	#NULL!	4	2	1	5	4	1	2	3	1	1	3	4	1	1	2	0	0	0	1	6	3	1	1	5	5	6	6	6	2	1	4	5	6	2	6	3	2	2	5	1	1	1	1	1
0.983333	2	58	1470	3	1	4	2	2	4	1	1	1	1	1	4	4	2	4	4	2	0	0	1	0	2	2	6	4	1	1	1	5	3	2	3	4	6	3	4	3	2	1	6	6	8	8	8	8	8
0.672245	1	62	3027	3	1	2	2	4	3	1	1	3	1	2	2	4	2	4	4	2	0	0	1	0	4	3	4	2	4	3	3	5	4	4	6	1	2	2	3	3	2	2	2	3	8	8	8	8	8
0.672245	1	61	1727	3	1	3	2	4	2	1	1	3	1	1	4	1	3	3	2	2	0	0	1	0	3	4	4	6	4	3	3	3	4	3	2	2	6	2	2	3	2	2	4	6	6	6	3	2	4
1.09369	1	34	4012	1	2	4	2	1	2	2	1	1	2	3	2	1	1	2	1	2	0	0	1	0	6	2	3	4	3	3	3	3	1	4	2	3	3	3	3	1	3	2	4	3	6	5	5	6	4
1.09369	1	30	4021	1	2	5	2	1	2	1	1	1	1	1	5	1	1	1	1	1	0	0	1	0	1	1	1	1	1	1	1	1	2	4	2	1	1	1	1	1	1	1	5	2	7	7	7	6	7
1.19483	1	48	657	2	1	4	2	4	4	3	4	4	3	3	4	3	4	2	4	1	0	1	0	0	3	3	4	2	5	4	4	3	4	4	5	3	4	4	3	3	5	4	3	3	6	5	4	5	5
0	1	18	#NULL!	1	#NULL!	3	2	2	1	3	1	1	2	2	3	3	2	3	2	2	0	0	0	1	1	2	3	2	2	2	3	2	2	1	1	1	1	2	1	2	1	1	5	2	6	6	6	4	7
1.105	2	36	691	2	1	5	2	1	5	1	2	3	1	1	5	4	4	4	4	1	0	0	1	0	2	4	5	4	4	3	2	5	3	4	6	2	6	6	2	6	6	2	2	6	4	3	4	3	5
1.06893	1	26	1389	1	1	4	2	1	1	2	1	1	2	2	3	2	2	3	2	1	0	0	1	0	1	2	4	2	3	2	2	2	1	2	2	3	3	3	3	2	2	2	4	2	5	4	5	4	7
1.06893	1	34	1543	1	1	3	2	1	3	2	1	1	2	1	4	3	2	3	2	1	0	1	0	0	2	3	2	3	3	2	2	4	2	1	2	2	1	1	3	2	2	1	2	3	4	4	5	3	5
0.827273	1	59	4052	3	2	4	2	2	5	1	1	3	1	1	2	3	5	5	5	1	0	0	1	0	5	5	5	5	2	2	2	5	5	5	5	1	6	1	5	5	5	6	1	5	1	4	1	1	1
1.105	2	42	1061	2	1	4	2	1	5	2	2	1	2	2	3	6	2	3	2	1	0	0	1	0	1	6	5	5	2	1	3	5	2	2	6	1	1	4	1	3	2	2	2	6	5	4	5	3	5
1.09369	1	20	7550	1	2	3	1	4	2	2	2	1	1	1	5	3	1	2	3	1	0	1	0	0	1	2	4	3	2	3	1	2	1	1	2	2	2	3	1	3	1	2	3	3	5	5	5	6	6
1.08976	2	39	7069	2	2	4	2	1	5	1	1	2	1	1	4	3	2	2	2	1	0	0	1	0	2	5	5	5	4	3	3	5	3	3	5	4	3	2	2	3	2	2	6	2	4	4	4	5	4
1.105	2	38	1065	2	1	4	2	1	5	2	5	5	2	2	4	4	6	6	6	1	0	0	1	0	2	2	4	6	3	6	3	3	3	6	2	5	2	3	2	6	6	6	4	6	5	4	3	4	5
1.06893	1	27	1182	1	1	4	1	1	5	2	2	1	3	2	2	2	3	2	2	1	0	0	1	0	3	2	2	2	6	3	2	3	3	2	2	3	3	4	3	3	2	2	1	3	4	7	3	6	4
1.19	2	30	15	1	1	4	3	1	2	1	1	1	1	1	4	4	2	4	4	1	0	1	0	0	4	2	3	4	5	1	1	5	2	2	2	5	3	2	2	3	2	2	1	3	3	3	3	1	5
1.06893	1	18	3733	1	1	1	2	1	1	2	2	2	4	4	3	4	3	2	1	1	0	1	0	0	2	2	2	2	3	3	3	5	2	2	3	2	3	3	4	3	3	3	5	4	3	3	4	4	5
1.09369	1	21	9009	1	2	3	2	1	4	1	1	1	1	1	4	2	1	1	3	1	0	0	1	0	3	2	5	1	1	3	3	5	1	1	1	1	3	3	1	4	1	2	2	2	4	6	7	7	7
0.827273	1	54	5217	3	2	5	2	6	5	2	2	2	2	2	4	3	3	4	4	1	0	1	0	0	4	3	2	3	4	3	3	5	2	3	3	2	2	3	3	3	2	3	2	4	5	3	6	4	6
1.06893	1	22	2340	1	1	4	1	2	1	1	1	2	2	1	2	1	1	3	2	1	0	0	1	0	1	1	1	2	1	2	1	2	3	3	2	2	3	4	3	3	3	2	3	3	7	7	4	7	7
0.672245	1	53	381	3	1	4	2	2	5	2	3	3	2	2	4	4	3	4	5	1	0	1	0	0	2	5	4	5	4	4	3	5	4	3	2	2	6	6	1	6	1	3	1	6	3	3	3	4	4
1.19	2	23	2150	1	1	4	2	1	5	1	2	2	2	3	3	4	3	4	4	2	0	0	1	0	3	4	5	5	2	1	3	5	3	2	6	2	2	6	4	3	2	1	2	6	4	4	4	3	4
1.09369	1	22	8520	1	2	4	1	1	1	1	1	1	2	2	3	2	3	2	2	2	0	0	1	0	3	1	2	3	2	1	3	2	3	1	1	1	2	3	2	3	1	1	4	2	6	4	5	5	5
1.09369	1	28	5178	1	2	2	2	2	3	1	1	1	1	1	3	3	2	2	2	1	0	1	0	0	2	2	2	2	1	1	2	2	1	1	2	2	3	2	1	3	1	2	4	2	6	7	7	5	6
1.09369	1	20	9350	1	2	2	2	5	1	2	5	2	1	2	4	4	5	5	5	1	0	0	1	0	1	4	3	3	1	3	2	2	1	1	1	2	2	2	1	5	1	6	1	3	6	4	7	5	7
1.06893	1	23	101	1	1	5	1	1	1	1	1	1	1	1	2	3	2	1	2	2	0	1	0	0	1	2	2	1	2	1	3	2	2	1	1	2	2	1	1	2	3	2	3	3	6	5	6	6	7
0.672245	1	59	3612	3	1	2	2	2	1	1	2	2	1	2	3	4	2	2	4	2	0	0	1	0	4	3	4	2	2	3	3	4	4	3	2	3	6	2	3	4	2	2	2	3	3	5	8	6	5
1.09369	1	23	4400	1	2	2	2	1	1	1	1	2	2	2	2	3	3	3	2	1	0	0	1	0	3	2	2	3	3	2	3	3	2	3	1	1	1	2	1	3	1	3	4	2	4	4	5	3	4
1.09369	1	21	6973	1	2	2	2	1	1	1	1	1	1	1	1	1	1	1	1	2	0	0	0	1	3	3	1	3	1	3	2	2	1	4	3	4	3	4	4	3	1	4	3	1	4	5	5	6	3
0.827273	1	59	5419	3	2	3	2	3	1	1	2	3	1	2	3	5	4	4	4	1	0	0	1	0	4	3	2	2	4	3	3	5	1	4	2	3	2	3	3	3	3	5	2	4	3	2	6	7	6
0.672245	1	66	3618	3	1	2	2	1	1	1	1	1	1	2	3	2	1	1	1	2	0	0	1	0	1	2	2	2	1	1	1	2	1	1	1	2	1	2	2	1	1	3	4	3	5	5	4	6	5
1.09369	1	26	4260	1	2	5	1	3	2	3	3	3	2	3	4	4	3	3	4	1	1	0	0	0	3	2	5	1	1	4	3	5	5	5	4	4	1	5	5	3	2	5	2	5	2	6	2	4	5
1.18171	1	46	6657	2	2	2	1	1	1	1	2	3	1	1	2	3	2	4	5	2	0	0	1	0	2	4	4	3	2	1	3	4	4	2	2	4	3	1	1	5	3	2	2	2	3	5	5	5	4
1.09369	1	20	4985	1	2	2	2	1	5	1	1	1	2	2	3	4	2	3	3	2	0	0	1	0	2	2	3	2	1	1	2	1	1	1	1	1	1	1	3	3	3	2	4	5	5	5	4	7	5
0	1	19	#NULL!	1	#NULL!	3	3	1	1	1	1	1	1	1	1	3	3	3	3	1	1	0	0	0	1	1	3	1	3	3	3	3	3	3	3	3	3	3	3	2	3	3	4	4	4	4	4	4	4
1.18171	1	43	7038	2	2	2	3	2	2	1	1	2	1	2	2	1	1	2	2	1	0	0	0	1	2	2	2	2	2	2	1	2	2	1	1	1	1	1	1	1	1	1	1	2	6	5	6	5	6
1.09369	1	23	5075	1	2	3	2	1	5	1	2	2	2	1	3	3	5	5	5	1	0	0	1	0	5	6	5	5	5	4	6	4	2	3	4	3	3	4	5	5	5	5	5	4	1	1	1	1	1
1.19483	1	49	554	2	1	5	2	5	1	1	1	2	1	2	4	3	2	2	2	2	0	0	1	0	3	2	2	1	5	3	3	4	1	1	2	2	2	2	4	3	3	5	5	2	6	6	8	6	6
1.06893	1	34	1465	1	1	4	2	2	2	1	1	1	2	2	3	4	2	3	2	1	0	0	1	0	2	2	4	3	2	2	2	3	3	3	1	1	2	6	1	6	1	4	3	3	3	6	5	5	3
1.46638	2	59	5350	3	2	2	2	1	5	1	1	1	1	2	3	4	3	3	4	2	0	0	1	0	4	4	5	4	5	5	3	5	5	4	6	1	2	2	2	6	3	2	1	3	4	4	8	4	4
0.827273	1	67	5472	3	2	4	2	5	5	1	1	1	1	1	4	2	2	2	2	2	0	0	1	0	3	3	4	3	3	2	3	3	3	3	2	1	6	2	1	4	2	2	2	2	7	7	8	6	7
0.827273	1	66	6480	3	2	2	2	1	3	1	1	2	1	1	3	4	2	2	2	2	0	0	1	0	2	3	3	3	3	3	3	3	3	2	3	3	4	3	3	3	3	2	2	3	5	5	4	5	5
1.06893	1	20	2000	1	1	5	1	1	3	1	1	1	1	1	1	2	1	1	1	2	0	0	1	0	1	1	1	1	1	1	1	1	1	1	1	1	1	1	1	1	1	1	1	3	7	7	7	7	7
1.08976	2	42	7236	2	2	5	2	5	5	1	2	2	1	2	4	2	3	3	3	1	0	1	0	0	2	3	4	3	3	2	3	5	2	2	3	5	4	3	4	3	3	4	4	3	2	4	4	4	4
0.827273	1	58	9360	3	2	2	2	1	1	1	1	2	1	1	3	3	2	3	3	1	0	0	1	0	4	3	2	2	3	3	2	3	2	2	2	3	3	3	1	4	2	3	2	6	4	5	5	5	5
1.105	2	36	679	2	1	5	2	2	2	2	2	2	2	2	3	3	2	2	2	2	0	0	0	1	2	2	4	3	2	2	2	5	3	3	2	2	2	3	3	2	2	3	6	3	4	4	4	5	5
0.827273	1	72	5300	3	2	4	2	1	5	1	1	1	1	1	4	3	2	2	2	2	0	0	1	0	4	4	4	4	3	5	2	5	3	2	3	2	2	2	2	2	2	2	2	3	6	7	5	4	5
0.827273	1	52	5178	3	2	4	2	1	1	1	1	4	2	2	3	6	5	5	5	2	0	0	1	0	5	5	5	5	3	2	3	5	5	5	5	5	6	6	6	6	6	6	6	5	8	8	8	8	8
0.983333	2	56	2315	3	1	2	2	2	2	1	1	2	2	2	3	4	3	3	3	2	0	0	1	0	3	4	5	5	6	6	6	6	5	3	6	6	6	5	5	5	6	3	1	5	8	8	8	8	8
1.105	2	49	3268	2	1	4	2	3	1	2	2	3	1	1	4	2	3	3	3	2	0	0	0	1	2	2	4	4	3	2	2	4	3	3	3	2	4	2	2	3	3	2	3	2	4	3	4	2	4
0.672245	1	72	1366	3	1	5	2	1	5	2	1	2	2	2	2	2	4	4	4	2	0	0	1	0	5	5	5	5	3	3	4	5	4	4	3	1	1	1	2	2	2	1	1	3	4	4	4	3	4
0.672245	1	57	264	3	1	4	2	1	1	2	1	3	2	3	2	6	5	5	5	1	0	0	1	0	5	5	5	5	5	5	5	5	5	5	5	5	5	6	6	6	6	6	6	6	1	1	1	1	1
1.19	2	34	3800	1	1	1	2	1	1	1	1	5	2	2	2	4	5	5	5	2	0	0	1	0	5	5	5	5	5	5	5	5	5	6	6	6	6	6	5	5	6	2	1	4	1	1	1	1	1
1.105	2	36	2345	2	1	2	2	5	1	1	2	2	2	1	4	4	3	3	3	2	0	0	1	0	3	3	3	3	4	3	3	3	3	3	3	3	3	4	3	3	3	3	3	3	8	8	8	8	8
0.827273	1	60	4070	3	2	2	2	6	6	1	1	5	1	1	4	4	3	3	3	2	0	0	1	0	6	6	6	6	6	6	6	6	6	6	6	6	6	6	6	6	6	6	6	6	8	8	8	8	8
1.12826	2	34	4629	1	2	4	2	1	5	1	1	1	3	2	4	4	2	2	2	2	0	0	1	0	1	2	5	4	3	2	2	5	3	3	2	1	4	2	2	4	3	1	4	6	5	5	6	5	5
0.672245	1	56	690	3	1	4	2	3	5	2	1	2	2	3	3	4	3	3	3	1	0	0	1	0	3	3	3	3	3	2	6	4	2	2	2	3	5	2	2	3	2	4	3	6	2	2	5	2	2
0.827273	1	75	4817	3	2	4	2	1	1	2	1	4	2	1	1	2	5	5	5	2	0	0	0	1	5	5	5	4	4	3	4	5	5	6	3	2	3	5	6	3	3	1	1	4	2	2	4	2	3
1.46638	2	66	5700	3	2	1	2	5	5	1	1	2	1	2	3	3	4	5	5	2	0	0	1	0	5	6	5	5	5	4	4	5	5	3	6	3	6	2	5	5	5	2	1	6	2	2	2	2	2
1.105	2	46	1472	2	1	3	1	1	1	1	1	1	1	1	4	3	3	3	3	2	0	0	1	0	5	5	5	4	2	3	2	5	3	3	3	3	3	3	3	3	3	3	3	3	3	5	5	2	5
0.827273	1	65	4879	3	2	2	2	1	2	1	2	4	3	2	2	3	5	5	5	2	0	0	0	1	3	5	4	5	4	1	3	4	4	3	3	4	4	2	2	3	4	3	1	3	3	5	3	4	3
0.827273	1	59	4950	3	2	3	2	1	2	1	1	2	1	2	3	4	4	4	4	2	0	0	1	0	4	3	6	2	3	3	3	5	4	3	2	6	4	1	1	4	2	1	2	1	5	6	8	3	6
1.19483	1	39	2010	2	1	4	2	4	4	2	1	5	2	2	4	5	5	5	5	1	0	1	0	0	3	6	6	3	5	5	6	5	3	6	3	6	6	6	6	6	6	6	1	6	8	8	6	7	4
0.827273	1	64	4849	3	2	2	1	6	5	1	1	2	1	1	3	3	2	2	3	2	0	0	1	0	5	4	5	3	3	3	6	6	6	6	6	6	6	6	4	6	3	3	6	6	3	5	8	8	5
0.827273	1	65	5162	3	2	3	2	1	5	2	1	1	2	3	4	3	3	3	3	1	0	0	1	0	4	2	4	3	3	3	3	4	2	2	3	1	3	2	2	3	2	2	2	3	3	4	3	3	4
0.672245	1	67	750	3	1	4	2	3	3	1	1	2	1	1	2	3	4	5	5	1	0	0	1	0	5	2	2	2	4	2	2	4	4	3	2	1	1	1	1	3	2	2	1	6	4	8	3	8	8
1.46638	2	75	4017	3	2	4	2	1	1	1	1	4	1	1	3	3	3	3	3	2	0	0	1	0	5	5	5	5	4	4	4	5	4	4	3	3	5	5	4	4	5	4	2	4	5	6	3	2	4
0.827273	1	61	7653	3	2	4	2	1	6	1	1	1	1	1	3	3	2	2	3	2	0	0	1	0	2	2	2	2	2	2	3	4	1	1	2	2	2	1	1	2	1	2	2	2	6	6	5	4	5
1.105	2	36	951	2	1	5	2	1	4	1	1	2	1	2	4	6	6	6	6	1	0	0	1	0	6	6	6	6	6	6	6	6	6	6	6	6	6	6	6	6	6	6	6	6	8	8	8	8	8
1.18171	1	38	5709	2	2	3	1	1	6	2	2	2	2	2	4	3	3	3	3	1	0	0	0	1	3	3	3	3	6	6	6	6	3	3	3	3	3	3	3	3	3	3	3	6	8	8	8	8	8
0.827273	1	74	5559	3	2	4	2	1	1	1	1	3	1	1	3	2	2	3	3	2	0	0	1	0	4	4	4	4	2	2	3	5	5	4	1	1	1	1	3	5	4	2	1	6	6	7	3	5	7
0.672245	1	67	1622	3	1	4	2	1	1	2	2	2	2	2	3	4	3	3	4	2	0	0	1	0	5	5	5	5	5	3	5	5	5	6	6	2	6	2	5	5	5	5	1	6	4	4	4	4	5
0.983333	2	53	380	3	1	5	2	2	1	1	1	2	1	1	2	3	3	4	3	2	0	0	1	0	5	5	5	5	6	4	3	5	5	5	5	5	5	5	5	5	5	5	1	5	8	8	8	8	8
0.672245	1	56	2060	3	1	5	2	1	1	2	1	5	2	2	2	3	4	6	6	2	0	0	1	0	3	6	5	6	6	3	6	6	5	6	6	6	6	6	6	6	5	6	1	5	8	8	8	8	8
0.983333	2	65	1772	3	1	4	2	5	1	1	1	1	1	1	3	3	2	2	1	2	0	0	1	0	2	3	3	5	2	2	3	4	6	5	4	2	3	3	1	6	2	2	1	3	3	6	4	4	5
0.827273	1	73	4085	3	2	3	2	1	5	1	1	1	1	1	4	3	3	3	3	2	0	0	1	0	3	3	3	4	4	5	4	3	3	4	4	4	3	2	2	2	3	3	2	2	8	6	8	6	7
0.827273	1	67	4012	3	2	5	2	4	2	1	1	1	1	1	4	1	2	2	2	1	0	0	1	0	2	3	5	6	3	3	4	4	3	3	3	1	3	4	1	5	1	5	5	6	8	4	8	1	6
0.672245	1	65	1279	3	1	4	2	1	1	4	4	4	3	4	3	4	5	5	5	2	0	0	1	0	5	5	5	5	5	5	5	5	5	5	5	6	5	1	5	5	5	5	1	5	8	8	8	8	8
0.827273	1	69	7715	3	2	1	2	1	5	3	2	3	3	4	7	4	3	3	3	2	0	0	0	1	3	4	4	4	4	2	2	6	2	2	2	6	5	1	2	3	1	1	1	3	2	1	5	3	3
0.983333	2	64	1386	3	1	4	2	1	3	2	2	2	2	2	4	3	4	3	4	2	0	0	1	0	4	4	4	4	4	4	4	4	3	2	3	3	3	2	3	3	2	4	3	6	4	4	3	4	4
0.672245	1	67	2165	3	1	4	1	3	5	1	1	3	1	1	2	4	4	4	5	1	0	0	1	0	3	2	4	2	3	2	2	4	2	3	3	6	4	2	5	6	5	2	1	3	3	4	5	2	4
0.672245	1	74	1680	3	1	2	1	1	1	1	1	4	1	1	1	1	5	5	5	2	0	0	1	0	5	5	5	5	5	5	5	5	5	5	6	6	6	1	5	6	5	6	1	6	3	3	1	1	1
0.672245	1	69	3711	3	1	5	2	1	1	2	2	2	1	3	4	2	4	3	2	1	0	0	1	0	4	4	5	3	4	4	4	5	4	2	4	1	1	4	2	4	2	5	5	3	3	2	5	4	6
0	2	62	#NULL!	3	#NULL!	2	2	3	1	1	1	1	1	1	3	2	2	3	3	1	0	0	1	0	1	3	3	3	2	1	3	6	3	2	3	1	1	1	1	2	1	1	2	2	7	7	5	6	5
1.46638	2	73	7374	3	2	4	2	2	1	2	1	2	1	1	4	4	3	3	3	2	0	0	1	0	2	3	4	3	3	3	3	4	3	3	2	3	3	2	2	3	2	2	2	3	5	7	6	6	5
0.672245	1	68	591	3	1	4	2	2	5	1	1	1	2	2	4	3	3	3	3	1	0	0	1	0	3	4	5	4	5	4	4	5	4	4	4	2	2	4	3	3	3	3	3	4	3	3	3	4	5
0.672245	1	75	1182	3	1	5	2	1	2	1	1	2	1	2	4	2	2	1	2	1	0	1	0	0	6	6	6	6	4	4	4	5	3	2	6	1	6	6	2	6	2	6	4	6	5	5	8	5	6
0.672245	1	61	3000	3	1	3	2	5	3	1	1	3	1	1	7	3	5	5	5	2	0	0	1	0	5	5	5	3	5	3	5	5	5	5	5	2	6	1	5	5	5	1	1	5	8	8	8	8	8
0.672245	1	74	3360	3	1	5	2	2	1	1	2	2	2	2	4	3	6	3	5	1	0	1	0	0	6	6	5	6	2	1	4	5	4	6	6	2	2	1	3	2	2	1	1	6	4	4	1	4	4
0.672245	1	67	2406	3	1	4	2	1	1	1	1	3	1	1	2	3	5	5	5	2	0	0	1	0	5	5	5	5	5	1	1	5	5	1	5	1	5	1	1	5	5	1	1	5	7	7	4	2	3
0.672245	1	73	1525	3	1	4	3	3	5	2	3	5	1	2	2	4	5	5	5	1	0	0	1	0	5	5	6	5	5	6	6	5	6	3	6	6	1	2	6	5	5	6	5	4	8	3	4	8	8
1.46638	2	54	9009	3	2	3	2	1	5	5	1	5	5	5	3	6	6	6	6	2	0	0	1	0	5	5	5	5	3	1	2	3	3	3	2	3	3	1	1	5	1	1	1	2	7	7	4	2	7
0.672245	1	62	1353	3	1	4	2	3	5	1	1	5	1	1	3	3	5	5	5	1	0	1	0	0	5	5	5	5	5	5	5	5	5	5	5	5	5	5	5	5	5	5	5	5	4	4	1	4	4
1.46638	2	62	4020	3	2	5	2	3	4	2	1	3	2	2	3	3	2	3	2	1	0	1	0	0	3	4	3	2	3	2	4	4	3	3	3	3	6	2	3	2	2	3	3	6	3	8	3	1	3
0.672245	1	75	2440	3	1	5	2	1	1	2	1	2	1	2	3	3	3	3	4	1	0	0	1	0	3	3	5	3	3	3	3	4	5	5	1	1	5	1	3	2	3	2	1	3	4	4	4	5	5
1.18171	1	38	4825	2	2	4	2	5	5	1	1	1	1	1	3	3	6	6	6	1	0	0	1	0	4	2	3	2	3	3	6	5	3	3	3	3	3	3	4	6	4	2	2	5	4	4	4	4	4
0.827273	1	74	4026	3	2	2	2	1	1	3	3	3	3	2	3	4	4	4	4	2	0	0	1	0	6	4	6	6	6	6	4	6	6	5	6	6	6	6	6	6	6	6	1	6	8	8	8	8	8
0.827273	1	68	5039	3	2	5	2	1	5	1	1	1	1	1	1	2	3	3	4	2	0	0	1	0	4	4	4	4	3	4	4	4	5	4	4	4	4	4	2	5	3	2	1	5	3	4	4	4	3
0.672245	1	68	2626	3	1	5	1	5	5	1	2	3	1	1	3	3	2	3	3	1	0	0	1	0	4	4	4	4	3	3	4	4	3	3	3	2	5	1	2	3	2	1	3	4	4	4	1	1	4
0.672245	1	62	1614	3	1	4	2	2	1	1	1	2	2	2	4	4	4	4	4	1	0	0	1	0	3	4	4	5	6	3	3	5	3	4	3	4	3	2	4	6	6	6	1	5	3	3	3	4	4
1.46638	2	59	4514	3	2	4	2	1	1	1	1	2	1	2	3	4	2	2	4	2	0	0	1	0	3	3	3	3	6	6	6	6	6	6	6	6	6	6	6	6	6	6	6	6	8	8	8	8	8
1.12826	2	34	5282	1	2	4	2	1	1	3	4	4	5	2	5	4	5	5	5	1	0	0	1	0	5	4	5	4	5	5	5	5	5	3	6	3	6	6	5	5	5	3	1	3	5	5	5	5	6
0.672245	1	51	1415	3	1	4	2	1	5	2	1	4	1	1	2	4	5	5	5	1	0	0	1	0	5	5	5	5	4	3	5	5	5	6	6	1	3	1	5	3	5	1	1	5	8	8	8	8	8
0.672245	1	56	1623	3	1	2	2	5	5	1	1	3	2	2	2	2	4	4	5	2	0	0	1	0	5	5	5	1	4	3	3	5	5	5	5	5	5	5	5	5	5	5	1	5	1	1	1	1	1
0.672245	1	68	1259	3	1	3	2	2	1	1	1	2	1	2	4	4	3	3	3	1	0	0	1	0	4	5	5	5	2	4	6	5	5	6	6	6	6	2	2	6	2	1	2	6	8	8	8	8	8
0.827273	1	69	8275	3	2	2	2	1	5	3	1	2	4	2	3	3	5	4	4	2	0	0	1	0	5	4	5	5	3	3	3	2	6	6	1	3	1	4	5	4	4	1	1	1	3	3	4	6	3
0.827273	1	68	5363	3	2	4	2	3	1	1	2	2	1	2	3	4	3	3	3	2	0	0	1	0	3	3	3	3	3	3	3	4	3	3	6	2	6	3	3	3	3	1	3	6	3	3	3	3	3
0.983333	2	50	2860	3	1	3	2	1	2	2	2	2	2	2	3	6	6	6	6	2	0	0	0	1	6	6	6	6	6	6	6	6	6	6	6	6	6	6	6	6	6	6	6	6	8	8	8	8	8
0.983333	2	70	472	3	1	5	2	3	2	1	5	2	1	4	4	2	1	4	1	1	0	0	1	0	3	5	5	5	1	2	1	5	5	6	6	1	1	4	3	6	6	6	6	5	1	1	1	6	5
0.672245	1	62	2100	3	1	4	2	5	5	1	1	3	1	2	2	2	5	5	5	1	0	1	0	0	2	2	3	3	3	2	3	4	4	3	3	2	2	4	3	3	3	2	1	4	5	5	3	2	6
0.827273	1	72	4250	3	2	1	2	2	1	1	1	3	1	2	2	3	5	5	5	2	0	0	0	1	5	5	5	5	2	3	3	3	5	5	5	5	5	5	3	2	2	2	2	3	1	4	1	1	4
0.827273	1	66	6973	3	2	3	2	5	5	2	1	2	2	2	3	3	3	3	3	2	0	0	1	0	3	3	3	3	6	2	3	2	3	3	3	3	3	3	3	3	3	3	3	6	8	8	8	8	8
0.983333	2	73	951	3	1	1	2	1	4	1	1	1	2	2	3	4	5	5	5	2	0	0	1	0	5	5	5	5	6	6	3	6	5	6	6	3	2	6	3	5	6	2	1	6	1	2	8	8	6
1.46638	2	68	4024	3	2	3	2	1	1	1	1	2	1	1	3	4	3	4	4	2	0	0	1	0	3	3	2	3	1	3	4	5	4	6	3	1	5	1	2	4	3	2	2	3	5	7	5	3	5
0.672245	1	55	3924	3	1	4	2	1	1	1	1	2	1	2	4	2	3	6	2	1	1	0	0	0	3	2	5	3	2	1	2	4	2	6	5	4	1	3	1	5	1	3	5	6	5	5	4	4	5
0.827273	1	61	5160	3	2	2	2	2	4	2	2	2	5	5	7	5	5	5	5	2	0	0	0	1	5	5	5	5	5	5	5	5	5	6	6	6	6	6	6	6	6	6	6	6	8	8	8	8	8
0.672245	1	68	260	3	1	5	2	2	5	1	2	2	2	2	4	4	4	5	5	1	0	0	1	0	5	5	4	5	5	3	3	5	4	6	6	1	6	2	1	2	2	2	2	6	4	5	4	5	5
0.672245	1	71	3023	3	1	5	2	2	2	1	1	1	1	1	3	3	2	2	4	1	0	0	1	0	4	2	6	6	2	2	2	5	3	2	4	1	2	2	3	2	4	1	1	2	1	1	5	3	5
0.672245	1	72	3520	3	1	4	2	1	1	1	1	2	1	1	4	3	1	1	2	2	0	0	1	0	3	3	5	5	2	2	2	5	3	3	3	1	4	2	2	3	2	2	5	3	6	6	4	3	4
0.983333	2	70	491	3	1	4	2	2	1	1	1	5	1	1	3	3	3	3	3	2	0	0	0	1	1	4	6	6	4	4	4	5	6	6	6	6	6	6	5	5	4	6	1	6	4	4	4	4	5
0.827273	1	72	7540	3	2	2	2	2	1	2	2	2	1	2	3	2	4	3	4	2	0	0	0	1	5	4	5	5	2	2	2	1	1	1	1	1	2	2	1	1	2	2	2	3	4	4	4	4	3
0.827273	1	74	5451	3	2	5	2	2	1	1	2	2	1	1	4	3	2	2	2	2	0	0	1	0	4	3	4	4	6	3	3	3	3	3	3	3	2	3	2	4	3	2	2	6	4	4	4	4	5
0.983333	2	71	3243	3	1	4	2	1	5	1	1	2	1	1	3	3	3	5	5	1	0	1	0	0	6	4	1	5	3	2	3	5	3	2	1	2	5	1	4	2	6	4	1	4	4	2	3	4	4
0.672245	1	72	1351	3	1	1	2	1	1	1	1	4	1	1	2	3	5	5	5	2	0	0	1	0	5	5	5	5	5	5	5	5	5	5	5	5	5	1	5	5	5	5	1	5	4	4	2	2	4
0.672245	1	71	1533	3	1	5	2	1	1	1	1	2	1	2	2	1	2	3	3	1	0	0	1	0	3	3	4	2	3	3	2	3	3	2	3	1	3	2	1	3	3	3	4	2	6	6	5	6	7
0.983333	2	52	1086	3	1	3	2	1	2	1	1	2	2	1	4	4	4	4	4	2	0	0	1	0	3	5	5	5	3	3	4	4	5	3	2	3	4	2	3	5	2	2	1	3	1	4	2	1	5
0.827273	1	67	4027	3	2	1	2	2	1	1	1	1	1	1	3	4	5	5	5	2	0	0	1	0	5	5	5	5	5	5	5	5	5	5	5	5	5	5	5	5	5	5	5	6	8	8	8	8	8
0.672245	1	63	976	3	1	2	2	1	5	3	3	4	4	4	4	1	5	5	5	1	0	1	0	0	5	5	5	5	2	2	4	6	3	4	3	1	5	1	3	3	3	1	1	4	1	1	3	2	1
0	2	68	#NULL!	3	#NULL!	5	2	5	5	2	1	1	1	2	4	3	4	2	2	2	0	0	1	0	2	4	5	5	5	4	3	5	3	6	6	2	6	6	2	6	2	3	6	6	3	3	8	1	4
0.983333	2	74	1406	3	1	4	2	2	2	1	1	1	1	1	4	3	6	4	2	1	1	0	0	0	2	4	4	3	3	3	3	5	3	2	6	1	3	6	1	4	1	4	4	2	5	5	5	8	5
1.46638	2	57	4623	3	2	4	2	2	1	1	1	3	1	1	3	3	3	3	3	2	0	0	1	0	3	3	3	3	3	2	4	4	6	3	6	3	6	2	4	6	2	2	6	2	5	5	5	3	5
0.827273	1	70	4043	3	2	4	2	1	1	1	1	1	1	1	2	4	5	5	5	2	0	0	1	0	5	5	5	5	5	5	5	5	5	6	1	1	1	1	5	5	5	6	1	5	6	6	1	3	6
0.672245	1	69	1930	3	1	2	2	2	5	1	1	2	1	1	4	4	5	3	3	2	0	0	1	0	6	6	5	6	2	2	3	5	5	6	6	1	2	5	2	6	3	2	1	6	6	6	8	7	7
0.983333	2	75	187	3	1	2	2	1	2	1	1	1	1	1	3	4	3	4	4	2	0	0	1	0	6	6	6	6	5	5	6	6	6	1	6	6	6	6	6	5	6	6	1	6	6	6	5	3	5
1.46638	2	55	4876	3	2	4	2	6	4	1	2	2	1	2	2	3	5	5	5	2	0	0	1	0	3	4	6	5	3	5	5	5	5	3	6	1	6	6	5	5	2	1	1	3	3	3	2	3	2
1.46638	2	53	4927	3	2	2	2	1	1	1	1	1	5	1	3	4	4	4	3	2	0	0	1	0	4	5	5	5	3	3	3	5	4	4	6	3	2	5	3	3	4	2	1	6	2	2	2	3	3
0.672245	1	66	1447	3	1	5	2	3	2	4	4	1	5	4	3	1	5	5	5	2	0	0	1	0	5	5	5	5	5	5	5	5	5	5	5	1	6	1	5	5	6	5	1	5	1	1	1	1	1
0.672245	1	67	1743	3	1	2	2	1	4	1	1	3	1	1	3	3	2	3	4	2	0	0	1	0	3	2	4	4	2	2	3	4	2	2	3	1	4	1	1	3	1	1	1	2	5	5	4	3	4
0.672245	1	72	2340	3	1	2	2	3	2	4	2	4	2	4	3	3	5	5	5	1	0	0	1	0	5	5	5	5	5	5	5	5	5	5	5	1	6	1	5	5	5	6	1	5	1	1	1	1	3
0.827273	1	64	7082	3	2	5	2	1	2	1	2	2	1	1	3	3	2	2	3	2	0	0	0	1	2	3	3	3	3	2	3	3	2	2	2	2	6	3	2	3	2	2	4	3	6	6	5	5	6
0.983333	2	60	3732	3	1	5	2	1	2	1	1	1	1	2	4	4	3	4	2	2	0	0	1	0	3	6	5	4	4	2	1	5	4	2	6	4	2	1	2	6	2	4	5	6	5	6	2	6	7
0.983333	2	65	2005	3	1	2	2	3	5	2	5	5	5	5	3	5	3	5	4	2	0	0	1	0	6	6	6	6	6	6	6	6	6	6	6	6	6	6	6	6	6	6	6	6	8	8	8	8	8
0.983333	2	74	195	3	1	4	2	1	1	3	2	2	2	2	2	3	4	2	3	2	0	0	1	0	4	4	4	3	4	5	5	4	4	3	1	1	1	4	2	2	2	4	1	4	2	2	2	3	3
0.827273	1	64	8590	3	2	1	2	5	5	2	2	2	2	2	3	4	3	3	4	2	0	0	1	0	4	3	4	5	3	3	3	5	5	6	5	6	2	6	5	5	6	3	5	6	3	3	1	1	5
0.983333	2	75	377	3	1	5	2	1	2	2	1	1	1	3	3	3	2	2	2	1	0	0	1	0	4	5	5	5	4	3	4	5	6	6	6	3	6	6	3	3	3	6	1	4	3	2	8	4	4
0.983333	2	72	3405	3	1	3	2	1	5	1	1	2	2	1	3	3	3	3	3	2	0	0	1	0	3	3	4	4	3	2	3	4	4	6	6	2	6	3	6	6	6	6	2	6	5	6	8	5	5
0.672245	1	67	3290	3	1	3	2	1	1	1	1	1	2	1	7	2	2	2	1	2	0	0	0	1	3	3	3	6	2	2	3	3	3	2	3	2	2	2	3	3	2	2	2	2	4	4	8	3	4
0.827273	1	67	7300	3	2	4	2	2	5	1	1	2	1	1	4	3	2	3	3	2	0	0	1	0	2	2	4	3	3	1	2	4	3	2	3	2	3	2	1	6	2	3	6	3	6	6	8	7	7
0.672245	1	64	1408	3	1	5	2	1	5	2	1	1	1	1	4	3	3	3	3	1	0	1	0	0	2	3	5	5	2	3	4	4	4	3	3	3	3	3	3	3	3	3	2	4	5	5	6	3	7
0.672245	1	53	464	3	1	4	2	1	5	1	2	2	1	2	4	3	2	2	2	1	0	0	1	0	2	4	3	3	2	1	2	5	3	2	3	3	2	4	2	3	2	2	4	2	4	4	5	4	5
0.672245	1	72	2014	3	1	5	2	2	1	3	2	3	2	3	3	4	3	3	3	2	0	0	1	0	4	4	4	4	4	4	4	4	4	4	4	4	4	4	4	4	4	4	4	6	2	2	2	2	6
0.983333	2	60	2032	3	1	3	2	1	5	1	2	2	1	2	4	3	4	3	3	1	0	1	0	0	1	4	5	5	2	3	4	5	3	2	4	3	3	3	2	3	3	2	4	2	6	5	6	3	6
1.46638	2	53	9550	3	2	2	2	6	6	5	5	5	5	5	3	5	4	4	4	2	0	0	1	0	6	6	6	6	6	6	6	6	6	6	6	6	6	6	6	6	6	6	6	6	8	8	8	8	8
1.46638	2	60	6444	3	2	2	2	1	1	1	1	5	1	1	7	4	4	4	4	2	0	0	1	0	5	5	5	5	5	4	4	5	5	5	5	5	5	5	5	5	5	5	1	5	8	8	8	8	8
0.672245	1	56	1154	3	1	4	2	1	1	1	1	1	3	3	4	3	1	1	1	1	0	0	1	0	2	2	4	5	1	1	1	1	3	3	4	1	1	2	2	4	3	4	4	2	4	5	3	3	6
0.672245	1	74	1405	3	1	3	2	1	1	2	1	1	2	2	4	2	2	2	2	2	0	0	0	1	4	2	4	4	3	3	3	4	3	2	3	2	2	1	2	2	3	4	3	3	4	4	4	4	4
0.672245	1	70	1747	3	1	3	2	6	1	1	1	3	1	1	3	3	3	3	4	1	0	0	1	0	4	4	4	4	4	3	3	4	4	4	6	4	4	2	3	4	4	2	4	4	2	2	2	2	2
0.672245	1	52	2219	3	1	3	2	6	5	1	1	4	1	1	3	3	5	5	5	1	0	0	1	0	3	3	3	3	6	2	6	5	3	6	6	1	1	1	5	6	5	2	1	5	1	1	4	4	4
0.827273	1	67	6788	3	2	2	2	1	1	1	2	3	1	2	3	4	3	4	5	2	0	0	1	0	3	3	5	3	4	3	4	5	4	3	2	2	3	2	3	3	3	2	2	6	5	5	8	8	8
0.672245	1	63	3018	3	1	2	2	1	3	1	1	3	1	1	2	4	5	5	5	2	0	0	0	1	5	5	5	5	3	3	3	5	5	3	6	3	6	6	3	6	2	1	1	6	3	5	3	2	4
0.827273	1	68	4327	3	2	1	2	1	2	2	2	3	1	1	3	3	5	5	5	2	0	0	1	0	4	4	4	4	5	6	5	5	5	5	6	3	6	2	5	5	4	6	1	5	3	6	2	5	2
0.672245	1	66	3128	3	1	4	2	1	1	2	2	1	2	2	3	3	3	3	2	1	0	0	1	0	4	4	4	4	3	3	4	5	5	5	6	2	6	6	6	3	6	3	6	3	3	2	2	3	4
0.983333	2	70	2010	3	1	4	2	2	2	1	1	1	2	2	4	4	2	2	3	2	0	0	1	0	2	3	4	3	3	2	2	4	3	2	3	4	2	2	2	2	1	2	3	2	5	4	5	4	4
0.827273	1	61	6964	3	2	5	1	4	2	1	1	2	1	2	2	2	4	4	4	1	0	0	1	0	4	5	4	4	3	2	3	5	4	5	3	1	2	3	3	4	3	3	2	4	6	5	3	4	4
0.983333	2	56	1284	3	1	2	2	1	1	1	1	5	1	1	3	4	5	4	4	2	0	0	1	0	4	5	5	5	2	2	6	6	3	6	6	6	6	2	6	6	3	2	1	6	4	4	2	5	4
0.983333	2	62	1653	3	1	3	2	1	1	1	1	1	1	1	3	6	4	4	4	2	0	0	1	0	4	4	5	5	3	3	3	4	4	6	6	6	6	6	3	3	1	1	1	6	4	4	4	4	4
0.672245	1	73	3133	3	1	5	2	2	1	1	2	3	2	2	3	3	4	3	5	1	0	0	1	0	4	4	5	5	3	4	3	5	4	3	6	1	6	2	2	1	4	2	1	3	4	4	4	7	5
0.672245	1	66	1615	3	1	2	2	1	1	2	2	2	1	2	3	4	5	5	5	2	0	0	1	0	5	5	5	5	4	3	3	5	5	5	6	6	6	6	5	5	5	6	1	5	3	8	3	8	3
0.827273	1	56	4625	3	2	5	2	3	1	1	1	4	2	2	2	2	5	5	5	1	0	0	1	0	2	5	5	5	5	5	5	5	1	6	5	6	6	6	6	6	6	6	1	2	3	3	3	5	4
0.983333	2	64	678	3	1	4	2	2	1	3	2	2	2	3	4	4	4	4	2	2	0	0	0	1	5	5	5	5	5	5	5	5	5	5	6	6	6	6	5	5	5	5	3	5	2	1	1	3	5
0.983333	2	66	2337	3	1	4	2	1	5	1	1	2	1	2	4	3	2	2	2	2	0	0	1	0	2	3	3	2	1	1	3	5	3	3	6	2	6	2	6	6	2	4	4	3	3	4	4	2	4
0.827273	1	73	4635	3	2	2	2	1	1	2	2	2	2	2	3	4	3	3	3	2	0	0	1	0	5	6	5	6	3	5	3	5	5	5	6	6	6	6	6	6	6	6	6	6	8	8	8	8	8
0.983333	2	62	1807	3	1	5	2	1	5	1	1	1	1	2	4	1	3	3	3	2	0	0	1	0	2	3	4	3	1	1	2	5	2	2	3	1	5	1	2	4	2	3	3	6	1	4	5	1	5
0.672245	1	75	3124	3	1	4	2	3	3	3	2	3	2	2	4	2	3	3	3	1	0	0	1	0	3	3	3	3	5	3	3	5	3	6	3	4	6	3	2	3	1	5	4	6	3	2	2	5	3
0.672245	1	69	1167	3	1	4	2	1	5	1	1	2	2	1	4	3	2	3	3	2	0	0	0	1	2	2	4	4	2	1	2	2	2	3	1	3	6	2	2	4	6	2	6	3	4	6	4	3	5
0.672245	1	70	3209	3	1	2	2	2	1	1	1	2	1	2	4	3	2	2	3	2	0	0	0	1	2	3	4	3	2	4	3	5	6	6	3	6	3	1	1	2	3	1	1	3	3	5	4	4	4
0.983333	2	52	369	3	1	4	2	1	1	2	1	2	2	3	3	4	4	4	4	2	0	0	1	0	4	4	4	4	2	2	2	4	3	3	3	3	3	2	3	3	3	3	3	3	2	2	2	4	4
0.983333	2	59	1348	3	1	5	2	1	5	2	2	2	2	2	4	4	3	3	3	2	0	0	0	1	4	3	4	5	3	3	6	6	5	3	6	2	6	2	6	6	6	6	6	6	8	8	8	8	8
1.46638	2	64	9016	3	2	3	2	1	5	2	5	5	2	2	1	3	4	4	5	1	0	0	1	0	5	5	5	5	3	3	5	3	5	6	6	1	6	1	6	6	6	6	1	3	1	1	1	8	8
0.983333	2	65	3145	3	1	1	2	5	5	1	2	2	2	1	4	4	2	3	3	2	0	0	1	0	2	3	3	5	4	3	3	5	3	2	6	1	6	6	2	6	6	2	2	6	3	4	3	4	4
0.827273	1	67	5535	3	2	4	2	1	1	1	1	4	2	2	2	2	5	5	5	2	0	0	1	0	5	5	5	5	4	3	3	4	5	5	1	4	5	1	5	5	5	5	1	5	3	4	8	5	1
0.827273	1	68	9600	3	2	4	2	3	2	2	2	2	1	1	3	4	3	3	3	2	0	0	1	0	3	3	4	4	3	3	3	4	3	3	3	3	4	2	3	6	3	3	2	4	3	3	2	1	3
0.827273	1	71	6770	3	2	5	2	2	6	1	1	3	1	1	3	2	3	3	2	1	0	0	1	0	3	3	5	4	2	1	2	2	5	3	5	1	5	6	3	3	2	1	2	6	8	8	8	8	8
0.983333	2	70	1406	3	1	5	2	2	2	1	1	1	1	1	3	2	2	2	2	2	0	0	0	1	3	2	3	5	1	2	3	3	6	6	6	3	5	1	6	6	2	1	3	2	4	5	8	8	4
1.46638	2	60	5104	3	2	3	2	1	1	1	1	2	1	1	3	3	3	3	3	2	0	0	0	1	6	6	3	6	3	3	3	3	6	6	6	2	2	6	1	6	2	2	6	6	8	8	8	8	8
0.983333	2	56	1281	3	1	3	2	1	5	1	1	1	1	1	5	4	4	5	5	2	0	0	1	0	5	5	5	5	5	5	3	5	5	3	6	4	6	1	6	5	5	6	1	6	8	8	8	8	8
1.19483	1	47	1430	2	1	3	1	2	1	1	1	1	1	1	2	1	1	1	1	1	1	0	0	0	1	1	1	1	1	1	1	1	1	1	1	1	1	1	1	1	1	1	1	3	3	3	5	4	4
1.46638	2	54	5236	3	2	4	2	5	5	1	2	5	1	1	4	4	2	2	6	2	0	0	1	0	2	6	4	6	1	1	1	6	2	6	6	4	2	2	6	3	6	2	2	3	4	5	8	5	4
0.827273	1	68	5993	3	2	4	2	2	5	1	1	2	1	2	3	3	2	3	3	1	0	0	1	0	2	3	2	3	4	4	3	5	3	2	3	2	2	3	4	6	2	2	3	3	4	4	3	3	3
1.08976	2	35	4628	2	2	4	2	6	5	1	1	1	2	2	4	4	6	5	5	2	0	0	1	0	3	6	6	2	3	3	6	6	5	4	6	1	6	6	6	6	6	6	6	6	8	8	8	8	8
0.827273	1	71	6856	3	2	4	2	2	5	1	2	2	1	2	3	3	5	4	4	2	0	0	1	0	4	5	4	5	5	3	3	5	5	5	6	6	6	6	6	6	6	6	6	6	8	8	8	8	8
0.672245	1	70	3114	3	1	5	2	3	1	2	2	3	2	2	2	2	5	3	3	1	0	0	1	0	5	5	5	5	4	4	4	5	4	3	6	6	6	2	4	4	4	3	1	4	4	3	4	4	5
0.983333	2	51	270	3	1	4	2	3	5	1	1	3	1	1	1	2	5	5	5	2	0	0	1	0	5	5	5	5	5	5	4	5	5	4	4	1	5	2	5	5	5	2	1	3	5	5	3	4	4
0.827273	1	72	4888	3	2	5	2	2	1	1	1	3	1	2	2	3	4	4	4	2	0	0	1	0	5	4	5	5	4	3	3	5	5	3	6	2	1	3	5	6	5	3	1	5	3	5	5	1	4
0.672245	1	65	659	3	1	3	2	2	2	2	1	5	1	2	4	4	3	3	3	1	0	0	1	0	3	5	5	5	5	5	5	5	4	6	6	6	2	5	1	5	5	5	2	6	4	3	8	3	5
1.46638	2	69	5550	3	2	4	2	5	5	1	1	3	1	1	2	3	5	5	5	2	0	0	1	0	3	4	5	5	3	4	3	4	5	4	3	3	4	2	3	4	2	3	1	3	6	6	4	4	5
1.46638	2	72	8050	3	2	3	2	4	2	2	1	2	1	1	3	4	2	3	3	2	0	0	0	1	2	2	3	2	1	2	3	3	2	2	2	1	3	3	1	3	2	3	2	3	6	5	4	2	7
0.983333	2	73	1481	3	1	5	2	2	1	2	1	2	2	1	3	3	2	3	3	2	0	0	0	1	4	4	4	4	4	4	4	5	5	2	3	2	4	3	2	4	4	4	2	2	4	4	8	4	4
1.46638	2	72	4614	3	2	5	2	2	1	1	1	1	3	2	4	4	6	6	6	2	0	0	1	0	6	3	6	3	4	3	3	5	6	6	2	6	6	4	3	6	4	6	6	6	8	8	8	8	8
1.46638	2	59	5648	3	2	2	2	5	5	1	1	2	1	1	2	3	2	2	3	2	0	0	1	0	2	2	3	3	2	2	2	3	2	2	3	2	2	3	3	2	3	2	3	2	8	8	8	8	8
0.672245	1	71	1386	3	1	5	2	4	4	2	1	1	1	1	3	3	3	3	4	1	0	0	1	0	4	3	5	4	3	3	3	5	3	3	2	1	6	2	2	2	2	2	1	4	5	4	3	4	5
0.672245	1	67	3535	3	1	4	2	3	5	2	4	4	2	1	1	2	5	5	5	2	0	0	1	0	5	5	5	5	5	5	5	5	5	5	5	5	5	5	5	5	5	5	5	5	1	1	1	1	1
0.672245	1	70	383	3	1	5	2	1	5	2	3	3	1	2	4	3	2	2	2	2	0	0	0	1	4	3	5	2	3	3	2	4	3	3	2	3	1	4	2	2	2	4	1	2	5	3	5	4	6
1.46638	2	69	4158	3	2	2	2	1	1	1	1	1	1	1	3	3	2	2	3	2	0	0	0	1	2	2	3	3	2	1	2	4	3	1	1	1	3	1	2	3	1	1	4	2	7	7	7	6	5
0.672245	1	65	2900	3	1	4	2	2	1	1	2	2	2	2	4	3	3	3	3	2	0	0	1	0	3	3	4	3	3	3	2	5	4	3	3	3	2	3	2	2	2	2	2	2	4	4	8	4	4
0.983333	2	67	661	3	1	5	2	1	1	1	1	2	1	1	3	2	2	3	3	1	0	0	1	0	3	3	5	5	2	2	1	3	3	2	1	1	3	4	1	3	2	1	1	2	4	4	4	5	5
0.983333	2	66	3280	3	1	3	2	5	5	1	1	2	1	1	3	3	4	4	4	2	0	0	1	0	5	5	5	5	3	4	4	5	5	6	5	6	6	6	5	5	5	6	1	5	4	4	3	5	3
0.983333	2	69	2450	3	1	4	2	1	5	1	1	3	1	1	3	2	3	3	4	2	0	0	0	1	2	4	5	5	3	1	6	4	4	4	6	6	3	2	2	4	4	1	1	6	6	6	2	2	5
0.983333	2	62	2216	3	1	4	2	5	5	1	1	2	1	1	2	2	4	5	5	2	0	0	1	0	5	5	5	5	3	3	5	5	5	5	5	5	5	5	5	5	5	6	1	4	2	2	2	2	2
0.827273	1	67	8300	3	2	2	2	2	1	1	1	1	2	2	3	3	3	3	3	1	0	0	1	0	3	2	2	2	2	3	3	4	3	2	3	2	1	3	2	2	2	2	2	2	5	6	5	4	5
1.46638	2	50	5145	3	2	5	2	1	1	2	2	2	2	2	4	4	3	3	2	2	0	0	1	0	3	4	5	5	4	3	3	5	6	6	6	3	3	4	2	3	3	5	3	4	2	2	2	2	3
0.827273	1	73	7718	3	2	2	2	2	5	1	1	1	1	1	4	1	1	1	2	1	0	1	0	0	2	2	2	2	2	1	1	2	1	1	1	1	1	5	1	4	1	2	5	2	6	6	3	1	6
1.46638	2	54	5143	3	2	5	2	3	3	1	1	1	1	1	3	2	5	5	5	2	0	0	1	0	5	5	5	5	5	3	5	5	5	3	5	3	3	2	5	5	5	1	1	2	3	4	3	3	4
0.983333	2	60	3360	3	1	2	2	1	2	1	1	1	1	1	3	6	6	6	6	2	0	0	1	0	5	5	5	5	2	1	4	5	5	6	6	6	6	6	6	6	5	6	1	6	8	8	8	8	8
0	2	52	#NULL!	3	#NULL!	4	2	1	5	1	1	1	1	1	4	6	2	2	2	2	0	0	1	0	3	5	5	5	4	1	4	5	5	4	6	1	5	6	1	3	2	2	3	6	6	6	3	6	5
0.672245	1	62	1706	3	1	2	2	5	5	3	1	4	4	3	1	2	5	5	5	2	0	0	1	0	5	5	5	5	5	5	5	5	5	5	5	5	5	5	5	5	5	5	1	5	1	1	1	1	1
0.827273	1	50	5551	3	2	2	2	3	3	1	1	2	1	1	5	3	3	3	4	1	0	1	0	0	2	3	5	5	4	2	2	5	3	2	5	3	3	3	2	4	3	5	4	4	7	7	6	6	7
0.672245	1	64	383	3	1	4	2	1	1	2	2	2	2	2	4	3	4	4	4	2	0	0	1	0	3	3	4	4	4	3	3	5	4	4	6	2	2	4	2	2	2	3	2	4	4	4	8	4	6
0.672245	1	71	962	3	1	5	2	4	2	3	3	4	2	2	3	2	5	5	5	1	0	0	1	0	5	5	5	5	4	3	3	5	5	5	5	5	5	1	5	5	5	1	1	6	2	2	2	4	4
0.672245	1	72	3041	3	1	3	2	1	1	1	2	2	2	2	4	4	3	2	2	2	0	0	1	0	4	3	2	4	3	3	3	4	3	2	6	2	6	1	6	6	3	2	2	4	3	4	2	2	5
1.46638	2	70	6250	3	2	2	2	1	5	1	1	5	1	1	7	3	2	3	3	2	0	0	1	0	6	6	6	6	6	6	6	6	6	6	6	6	6	6	6	6	6	6	6	6	8	8	8	8	8
1.46638	2	68	6783	3	2	4	2	5	5	1	1	1	1	1	4	3	1	2	1	2	0	0	0	1	3	2	5	4	2	2	2	4	2	2	6	2	6	2	2	6	6	4	4	6	8	8	8	8	8
0.672245	1	69	1482	3	1	4	2	3	1	1	1	3	1	1	4	1	4	4	4	2	0	0	1	0	4	4	5	5	4	2	3	5	5	6	6	3	3	2	3	4	4	2	1	3	3	6	4	2	5
0.983333	2	53	983	3	1	2	2	1	5	1	1	1	1	1	3	4	1	2	2	2	0	0	1	0	2	2	3	2	1	1	1	3	2	1	1	1	2	2	1	3	2	3	4	2	7	7	7	5	7
0.827273	1	71	7716	3	2	4	2	1	1	1	1	1	3	3	4	2	5	5	5	1	0	0	1	0	4	5	4	2	5	5	5	5	5	5	2	1	2	4	1	3	2	5	1	4	3	3	3	5	5
0.672245	1	57	1062	3	1	2	2	1	4	1	1	2	1	1	4	3	5	3	3	1	0	0	1	0	5	4	5	5	5	4	4	5	5	5	3	3	3	3	5	5	5	3	1	5	1	1	1	2	2
0.983333	2	74	753	3	1	5	2	1	2	1	2	2	1	2	3	4	6	3	6	1	0	0	1	0	2	6	6	6	6	3	6	5	2	6	6	2	6	6	6	6	2	6	6	6	4	4	8	4	4
1.46638	2	52	4049	3	2	3	2	5	5	1	2	5	5	5	2	4	5	5	5	2	0	0	1	0	5	5	5	5	3	5	6	6	5	6	5	6	3	6	5	5	6	2	1	6	8	8	8	8	8
1.46638	2	58	4056	3	2	2	2	1	5	1	2	3	2	2	3	4	4	4	2	2	0	0	1	0	5	5	5	5	5	3	6	4	5	5	6	6	6	1	3	6	2	2	1	6	4	4	8	4	4
0.672245	1	66	3055	3	1	4	2	4	2	2	1	3	1	1	2	3	4	4	4	1	0	0	1	0	3	4	5	3	2	2	6	4	4	4	2	4	6	6	2	6	2	2	1	3	3	3	3	3	3
1.46638	2	65	8523	3	2	4	2	1	1	1	1	1	1	2	4	3	2	3	3	1	0	1	0	0	2	2	3	4	3	3	6	4	2	2	6	1	6	6	3	3	3	2	2	6	8	8	5	3	5
0.983333	2	68	1639	3	1	2	2	1	2	2	1	5	2	2	3	4	6	6	6	2	0	0	1	0	3	5	5	5	4	4	3	5	4	6	6	6	3	1	6	6	6	6	1	6	8	8	8	8	8
1.46638	2	55	4044	3	2	4	2	2	1	1	2	1	2	1	3	4	3	3	3	2	0	0	1	0	3	3	5	3	3	1	2	5	3	3	3	2	3	1	3	3	3	2	1	3	4	4	4	4	6
0.827273	1	67	6980	3	2	2	2	1	5	1	1	2	1	2	4	4	2	2	2	2	0	0	1	0	6	5	5	5	3	2	6	6	6	6	6	6	6	6	6	5	2	1	1	4	5	8	8	5	4
0.827273	1	65	5016	3	2	5	2	5	5	1	1	1	1	1	4	3	2	2	2	2	0	0	1	0	2	4	4	3	5	4	5	5	3	2	1	1	5	1	2	2	2	3	4	2	4	7	3	3	4
0.672245	1	61	681	3	1	4	2	3	2	1	2	3	2	2	3	5	4	4	5	2	0	0	1	0	5	4	5	5	2	3	3	5	5	5	1	2	5	2	5	4	4	1	1	6	8	8	8	8	8
0.672245	1	56	1791	3	1	4	2	1	1	2	2	5	2	2	2	5	4	4	5	1	0	0	1	0	5	5	5	5	5	5	5	5	5	6	6	1	6	6	6	6	6	2	1	6	5	4	8	3	2
0.827273	1	72	4360	3	2	4	2	1	1	2	1	2	2	2	2	2	3	4	4	2	0	0	1	0	3	2	2	3	2	2	2	3	2	3	3	1	2	3	2	3	2	1	1	2	5	6	5	5	6
0.672245	1	56	3025	3	1	5	2	2	2	2	2	3	1	1	4	4	4	4	4	1	0	0	1	0	4	5	5	5	4	4	4	5	5	4	6	1	6	6	5	5	6	5	1	6	4	4	3	4	4
0.827273	1	57	5229	3	2	5	2	2	1	2	1	2	1	1	3	4	4	5	5	1	0	0	1	0	2	3	4	2	3	1	2	5	2	2	2	1	3	2	1	3	2	1	1	1	5	5	6	6	7
0.827273	1	63	4017	3	2	2	2	1	5	1	1	2	1	1	3	6	3	3	4	2	0	0	1	0	5	5	5	6	4	4	5	5	5	6	5	6	6	6	6	5	6	6	1	6	8	8	8	8	8
1.46638	2	54	4631	3	2	2	2	5	5	1	1	1	1	1	3	3	2	3	3	2	0	0	1	0	5	5	5	5	4	2	3	4	5	2	5	2	1	3	3	3	3	1	1	6	5	5	4	7	6
0.672245	1	69	1459	3	1	4	2	1	1	1	1	2	1	1	4	4	3	4	4	1	0	1	0	0	3	4	5	5	3	2	3	2	1	6	2	1	2	2	3	6	1	2	2	5	4	4	6	3	7
1.19483	1	44	2634	2	1	5	2	2	3	1	1	3	1	1	2	3	5	5	5	1	0	1	0	0	3	3	3	2	4	3	4	4	3	5	2	1	4	1	3	2	3	3	1	5	3	3	4	4	4
0.983333	2	69	3145	3	1	2	2	2	3	1	1	2	2	2	3	5	6	6	6	2	0	0	1	0	5	6	5	6	6	6	6	5	6	6	6	6	6	6	6	6	6	6	1	6	4	4	4	6	6
0.983333	2	60	2850	3	1	5	2	1	5	2	2	4	2	2	4	3	5	5	4	1	0	1	0	0	5	5	5	5	5	3	5	5	5	5	5	1	1	5	5	3	5	5	1	5	1	1	1	1	6
0.983333	2	71	1410	3	1	4	2	2	5	2	1	2	1	2	4	4	3	3	3	1	0	0	1	0	2	2	4	4	3	3	4	4	2	3	4	4	2	3	2	2	2	3	4	2	4	5	3	4	5
0.827273	1	61	6893	3	2	2	2	5	5	1	1	2	1	1	2	2	3	3	3	2	0	0	1	0	4	4	4	4	4	4	4	6	6	6	6	6	6	6	5	6	3	3	2	3	8	8	8	8	8
0.827273	1	74	4631	3	2	5	2	2	2	2	1	2	1	2	3	2	3	3	3	1	0	1	0	0	3	2	3	2	2	3	2	4	2	2	2	2	3	3	1	2	2	2	4	3	4	4	3	5	6
1.46638	2	75	5183	3	2	3	2	1	2	1	1	4	3	2	1	6	3	4	4	2	0	0	1	0	6	6	5	5	6	4	6	5	6	3	3	2	6	6	6	6	4	3	1	6	8	8	2	8	8
0.672245	1	60	1406	3	1	4	2	2	5	1	2	2	1	2	3	2	4	4	4	1	0	0	1	0	5	4	5	5	4	2	5	5	5	5	5	5	5	1	5	5	5	5	1	5	1	1	1	1	1
0.672245	1	69	3579	3	1	2	2	5	5	2	1	2	1	3	3	4	2	4	5	2	0	0	1	0	4	3	2	2	3	2	3	5	4	2	1	1	2	3	5	2	2	2	1	3	5	5	8	5	6
0.983333	2	65	2283	3	1	4	2	1	5	1	1	4	1	3	4	4	5	5	5	2	0	0	1	0	1	5	1	1	3	1	2	5	5	3	5	6	6	6	5	5	5	1	1	5	1	3	1	1	2
0.827273	1	52	4260	3	2	4	2	1	2	2	1	2	1	1	4	3	2	2	2	2	0	0	1	0	6	6	6	6	6	6	6	6	6	6	6	6	6	6	6	6	6	6	6	6	8	8	8	8	8
0.827273	1	61	5640	3	2	2	2	1	1	1	1	3	1	1	3	3	3	3	3	2	0	0	0	1	3	3	4	4	4	3	4	4	5	3	3	3	4	3	4	3	3	2	2	3	6	6	8	6	5
0.983333	2	61	678	3	1	4	2	2	2	1	5	2	2	2	4	3	2	3	3	1	0	0	1	0	3	3	3	3	4	6	3	5	4	6	6	6	6	6	6	6	6	6	6	6	8	8	8	8	8
1.46638	2	75	8021	3	2	2	2	1	5	4	1	1	1	1	2	3	3	3	4	2	0	0	1	0	4	4	4	2	3	3	4	3	4	3	3	3	3	3	3	2	3	3	1	3	8	8	8	8	8
0.983333	2	51	1084	3	1	2	2	1	5	3	1	3	2	1	2	4	6	6	6	2	0	0	0	1	6	6	6	6	6	6	5	5	6	6	6	6	6	6	6	6	6	6	6	3	8	8	8	8	8
1.46638	2	60	6065	3	2	2	2	2	1	2	2	5	1	1	4	4	3	3	3	2	0	0	1	0	3	3	4	4	6	3	3	4	5	6	6	2	2	6	3	2	2	3	6	6	2	2	1	2	2
1.46638	2	67	8519	3	2	5	2	2	1	1	1	2	1	1	3	3	5	3	4	2	0	0	1	0	5	5	5	5	4	4	4	5	5	5	5	5	6	6	5	5	3	2	5	6	1	5	1	1	4
1.46638	2	50	5221	3	2	4	2	1	1	1	2	2	2	2	3	4	2	6	6	1	0	0	1	0	2	2	6	6	2	1	2	4	3	2	2	6	3	2	2	2	2	2	3	2	5	6	4	3	6
0.983333	2	65	3019	3	1	4	2	5	5	1	1	2	2	1	4	3	2	2	3	2	0	0	1	0	2	2	5	4	2	2	3	5	3	2	2	2	2	2	1	3	2	1	6	3	6	6	6	5	6
0.827273	1	71	4820	3	2	2	2	1	6	2	2	2	2	2	3	6	3	3	3	2	0	0	1	0	5	3	5	3	6	6	6	6	5	6	5	6	6	6	6	6	6	6	6	6	8	8	8	8	8
0.672245	1	74	477	3	1	1	2	2	2	1	1	2	1	2	3	4	6	6	6	2	0	0	0	1	2	3	2	2	3	4	3	5	4	3	2	3	3	4	2	3	2	4	3	6	4	4	5	5	4
0.672245	1	71	3470	3	1	3	2	2	1	4	4	4	2	2	1	2	5	5	5	1	0	0	1	0	5	5	5	5	5	4	5	5	5	5	6	6	6	1	5	5	5	6	1	5	1	2	1	1	1
0.827273	1	69	7300	3	2	5	2	1	5	1	1	2	1	2	4	4	6	6	6	2	0	0	1	0	6	6	6	6	6	6	6	6	4	4	5	4	6	6	6	4	5	4	1	5	8	8	2	4	8
0.672245	1	51	2407	3	1	3	2	1	5	1	2	2	1	1	3	3	5	5	5	2	0	0	1	0	2	3	5	5	5	5	2	5	5	6	5	6	3	6	2	3	2	1	2	3	8	8	8	8	8
0.672245	1	68	3211	3	1	2	2	2	2	1	1	2	2	2	3	2	4	4	4	2	0	0	1	0	5	5	5	5	3	3	4	6	5	5	6	6	6	6	5	6	6	1	5	6	8	8	8	8	8
0.672245	1	65	2819	3	1	4	2	2	2	2	1	2	1	1	3	4	3	3	3	2	0	0	1	0	4	3	3	2	2	3	3	5	3	2	5	1	4	1	2	2	1	1	4	3	4	5	4	5	7
0.827273	1	54	8480	3	2	5	2	5	4	1	1	4	1	1	6	1	5	5	5	1	0	1	0	0	3	3	3	2	3	2	2	5	1	6	4	3	4	1	2	4	2	3	6	3	5	5	5	5	5
0.983333	2	55	1435	3	1	4	2	2	6	2	1	5	2	1	2	3	4	4	5	2	0	0	1	0	4	2	5	5	3	3	3	5	6	6	6	6	6	6	6	6	6	1	2	3	8	8	8	8	8
0.983333	2	60	1850	3	1	2	2	1	1	1	1	1	1	1	3	5	4	5	5	2	0	0	0	1	5	4	5	5	5	4	5	5	5	6	6	6	6	6	6	6	6	4	1	6	5	5	5	3	5
0.672245	1	70	1605	3	1	4	2	3	1	2	2	4	1	1	1	1	1	1	1	1	0	0	1	0	5	1	5	5	5	1	6	5	5	5	5	5	5	6	5	5	5	6	5	5	1	1	1	1	1
0.983333	2	67	377	3	1	4	2	2	1	1	1	2	1	1	3	4	3	4	5	1	0	0	1	0	5	3	3	3	4	3	4	5	4	4	1	1	5	1	2	3	3	1	1	6	2	3	3	2	2
0.983333	2	62	1086	3	1	4	2	1	1	4	4	1	2	4	3	2	5	5	5	2	0	0	1	0	5	1	5	3	5	5	5	5	5	3	3	2	3	1	5	2	1	1	3	5	1	1	8	3	7
1.46638	2	62	7036	3	2	4	2	1	1	1	1	2	1	1	3	4	1	2	1	2	0	0	1	0	3	2	6	2	4	2	2	5	2	6	1	1	2	1	6	6	2	1	6	6	8	8	8	8	8
0.827273	1	55	5009	3	2	5	2	4	1	3	2	1	1	1	4	3	2	2	1	1	0	1	0	0	2	2	5	5	2	2	1	3	3	4	1	2	4	2	2	4	2	4	4	4	4	5	4	6	7
0.672245	1	64	192	3	1	4	2	5	3	1	1	1	1	1	4	2	3	3	3	2	0	0	1	0	3	3	4	5	3	5	5	5	3	3	3	3	3	3	3	4	2	3	2	3	2	2	2	2	2
0.827273	1	57	4619	3	2	3	2	2	2	1	1	5	1	1	3	3	2	2	3	1	0	0	1	0	3	3	5	5	4	4	6	4	4	3	3	3	6	6	3	6	3	6	6	6	8	8	8	8	8
0.672245	1	68	3188	3	1	4	2	1	5	2	2	2	1	2	3	4	5	5	5	1	0	0	1	0	4	4	5	5	5	3	6	5	5	3	6	3	5	1	3	6	3	1	1	5	3	3	1	3	2
0.983333	2	64	674	3	1	4	2	2	1	1	1	3	1	1	2	3	4	4	5	2	0	0	1	0	5	5	5	5	3	6	4	6	5	6	6	1	3	1	3	3	3	1	1	6	2	3	1	8	1
0.827273	1	66	9100	3	2	5	2	3	3	1	1	3	1	1	3	4	3	3	3	2	0	0	1	0	3	3	2	2	5	2	3	5	3	3	3	3	4	1	3	3	3	2	3	3	3	5	4	3	3
0.983333	2	56	3172	3	1	4	2	1	5	1	1	2	1	2	3	4	4	4	5	1	0	0	1	0	4	4	5	4	5	2	6	2	4	2	3	1	1	1	2	2	3	4	1	3	4	4	8	3	5
0.983333	2	55	661	3	1	4	2	1	5	1	1	1	1	1	4	5	2	3	3	2	0	0	1	0	2	3	5	5	1	3	6	3	2	2	6	2	6	2	1	4	1	1	1	6	6	7	8	5	6
0.672245	1	54	194	3	1	4	2	2	1	2	2	2	2	2	4	4	2	3	3	1	1	1	0	0	3	4	2	2	3	1	3	4	1	1	1	1	2	2	2	2	3	3	3	2	4	5	5	5	5
1.19483	1	45	2335	2	1	4	2	5	5	1	1	2	1	1	4	4	5	5	5	2	0	0	1	0	4	4	5	4	4	5	4	5	4	3	6	2	6	6	4	4	6	6	2	6	4	4	6	5	7
0.983333	2	66	1642	3	1	4	2	1	5	2	2	3	2	2	2	4	4	4	4	2	0	0	1	0	4	4	4	4	4	3	3	5	5	5	6	2	6	2	4	4	3	2	1	6	6	6	1	1	1
0.983333	2	63	1524	3	1	2	2	5	5	1	1	3	1	1	3	4	4	4	4	2	0	0	1	0	4	4	4	4	3	3	3	5	4	6	5	6	6	6	5	4	4	5	5	6	8	8	8	8	8
0.983333	2	55	1450	3	1	4	2	1	2	1	1	2	1	1	3	4	4	5	5	1	0	0	1	0	4	4	5	4	3	1	2	5	1	2	3	4	6	1	5	4	6	5	1	6	6	6	8	4	5
0.827273	1	68	6264	3	2	4	2	1	5	1	1	2	1	1	4	3	3	4	4	2	0	0	1	0	4	4	4	3	3	4	4	5	5	4	1	1	6	1	2	5	2	1	1	6	5	4	3	5	5
0.672245	1	68	1778	3	1	1	2	1	1	1	1	2	2	2	4	4	3	2	3	2	0	0	1	0	3	3	4	5	2	3	2	3	4	2	3	1	2	1	1	3	2	2	2	3	5	6	4	4	5
1.46638	2	59	7091	3	2	4	2	5	5	2	1	1	2	3	4	2	3	4	4	1	0	1	0	0	3	3	5	5	3	2	3	3	4	4	3	3	2	1	1	2	2	2	2	5	1	1	1	1	1
0.672245	1	54	1621	3	1	4	2	1	1	1	1	3	1	2	3	3	5	5	5	2	0	0	0	1	5	5	5	5	3	3	5	3	5	6	6	6	6	2	3	4	6	2	1	3	4	3	3	3	4
0.672245	1	68	3015	3	1	5	2	3	1	1	1	1	1	2	4	2	3	2	3	1	0	0	1	0	3	2	2	2	3	2	3	4	2	1	1	3	2	2	2	3	2	2	3	2	4	3	5	4	4
0.827273	1	56	8517	3	2	5	2	2	1	1	2	5	1	1	2	3	6	3	3	1	0	0	1	0	5	3	6	3	3	2	2	5	6	6	3	2	4	2	6	6	2	6	6	6	8	8	8	8	8
0.983333	2	69	1340	3	1	5	2	1	5	2	1	1	1	3	4	3	6	3	4	2	0	0	1	0	2	3	5	5	5	3	3	5	5	5	1	1	1	3	2	6	2	5	1	1	4	1	1	6	6
1.46638	2	69	8000	3	2	4	2	1	1	2	1	1	2	3	5	3	2	3	2	1	0	1	0	0	2	3	5	5	3	4	4	3	3	3	2	2	2	4	2	3	2	4	5	4	4	4	3	4	5
0.672245	1	62	3613	3	1	4	2	2	1	3	2	2	2	3	4	3	5	5	5	1	0	0	1	0	5	5	5	5	5	4	4	5	4	4	2	2	1	4	2	3	4	3	1	5	3	2	2	3	4
1.105	2	42	1624	2	1	4	2	5	5	1	1	2	2	1	3	3	4	5	5	2	0	0	1	0	3	3	4	4	4	1	3	5	3	3	3	3	3	2	2	2	3	2	2	2	4	4	4	4	4
0.672245	1	72	1	3	1	5	2	2	5	1	1	2	1	2	4	4	2	2	3	2	0	0	1	0	3	3	3	3	4	3	3	5	6	6	6	6	6	6	2	3	3	3	2	6	4	5	3	2	5
0.983333	2	67	2607	3	1	5	2	2	1	1	1	1	1	1	4	3	3	3	3	2	0	0	1	0	4	3	4	4	2	2	3	3	5	3	1	2	2	3	3	6	6	1	1	4	3	4	3	2	2
0.827273	1	72	9016	3	2	4	2	3	1	1	1	2	2	2	4	5	3	3	3	2	0	0	1	0	5	5	5	5	6	6	6	6	5	5	5	5	5	5	6	6	6	6	1	6	8	8	8	8	8
0.672245	1	72	661	3	1	4	2	2	1	1	2	2	1	2	3	4	2	1	3	1	1	0	0	0	2	5	4	4	3	3	4	5	2	2	3	1	3	1	4	4	2	3	1	3	5	5	7	4	2
1.46638	2	62	6899	3	2	1	2	1	5	1	1	1	1	1	7	6	3	4	5	2	0	0	1	0	5	5	5	5	3	3	4	6	6	3	1	2	2	3	4	5	4	1	3	2	6	5	8	5	5
1.46638	2	50	7033	3	2	5	2	1	1	2	2	3	2	2	3	3	3	4	4	1	0	0	1	0	2	3	2	5	3	1	2	5	3	3	2	2	4	2	1	4	2	2	2	3	4	4	2	2	7
1.46638	2	50	7380	3	2	3	2	5	1	1	1	1	1	1	3	6	3	3	3	2	0	0	1	0	6	6	6	6	6	6	6	6	6	6	6	6	6	6	6	6	6	6	6	6	8	8	8	8	8
0.672245	1	73	2817	3	1	4	2	1	3	2	1	2	2	2	3	4	3	3	3	1	0	0	1	0	2	2	3	2	3	3	3	3	4	2	3	2	1	1	2	3	2	2	3	3	5	6	5	6	6
0.827273	1	63	4635	3	2	2	2	2	2	2	2	3	3	2	3	3	5	5	5	2	0	0	1	0	5	5	5	5	3	3	4	5	5	5	5	6	5	3	5	5	5	5	1	2	4	4	1	5	4
1.46638	2	61	4400	3	2	3	2	6	2	1	1	1	2	2	3	5	6	6	6	2	0	0	1	0	6	6	6	6	6	6	6	6	5	1	5	3	6	6	6	6	6	6	6	6	8	8	8	8	8
0.672245	1	62	1850	3	1	3	2	5	1	1	1	2	1	1	2	3	3	3	6	2	0	0	1	0	6	6	6	6	6	6	6	6	6	6	6	6	6	6	6	6	6	3	1	6	8	8	8	8	8
0.827273	1	67	8540	3	2	4	2	1	5	1	1	3	2	1	3	2	4	4	4	2	0	0	1	0	4	3	4	3	4	3	3	4	5	4	3	3	1	1	2	3	3	2	1	4	4	4	2	4	3
0.672245	1	73	880	3	1	5	2	2	1	1	1	2	1	1	2	2	4	5	5	2	0	0	1	0	5	5	5	3	4	4	5	5	6	3	5	2	5	1	5	6	5	2	3	6	5	5	4	4	5
0.672245	1	53	1397	3	1	4	2	1	2	1	1	2	1	1	4	3	3	3	4	1	0	0	1	0	3	3	2	2	3	2	2	4	2	2	2	2	3	3	2	3	2	2	2	3	3	3	4	3	5
0.672245	1	74	2680	3	1	5	2	1	5	1	1	2	1	1	4	3	2	3	4	2	0	0	1	0	2	3	5	5	3	3	3	5	4	4	2	2	4	2	1	2	2	2	2	3	6	6	8	7	7
0.827273	1	62	8011	3	2	4	2	1	2	2	1	2	2	2	3	3	3	3	3	1	0	0	1	0	4	3	6	4	3	3	3	5	4	5	6	2	5	2	6	2	3	2	1	5	3	4	2	2	3
0.672245	1	65	656	3	1	1	2	1	1	1	1	2	1	2	4	3	2	2	2	1	0	0	1	0	2	2	4	4	3	2	3	4	5	2	3	2	3	3	2	4	2	4	3	3	4	4	4	3	5
0.983333	2	70	1540	3	1	4	2	2	5	1	1	4	1	1	2	2	5	5	5	1	0	0	1	0	5	5	5	5	3	3	3	5	5	5	6	1	5	1	5	6	6	6	1	5	1	1	1	1	5
0.827273	1	58	6600	3	2	2	2	1	1	1	1	1	1	1	3	5	5	5	5	1	0	0	1	0	5	5	5	5	5	5	5	5	5	5	5	5	6	6	5	5	5	5	1	5	3	4	1	4	5
0.672245	1	61	1743	3	1	2	2	1	2	2	1	1	1	1	4	2	2	5	2	2	0	0	1	0	4	5	5	5	1	1	3	4	3	2	6	1	6	2	2	6	2	6	3	6	3	4	2	3	5
1.46638	2	53	8615	3	2	3	2	3	5	1	1	3	1	1	2	3	4	4	2	2	0	1	0	0	2	5	5	5	6	1	1	5	5	6	6	6	6	6	6	6	6	6	6	6	8	8	8	8	8
1.46638	2	57	7374	3	2	4	2	1	5	1	1	2	1	1	3	2	2	2	2	2	0	0	1	0	2	2	3	3	2	3	3	6	2	2	3	2	3	2	2	3	2	2	1	3	5	5	4	5	4
0.983333	2	59	2022	3	1	4	2	1	5	1	1	2	1	1	2	3	5	5	5	2	0	0	0	1	5	5	5	5	5	4	4	5	5	5	6	5	6	3	5	6	6	3	1	6	8	3	8	8	8
0.983333	2	64	3514	3	1	4	2	2	2	2	1	2	1	2	3	3	3	3	3	1	0	0	1	0	5	4	5	4	2	2	3	5	5	6	6	1	3	6	3	6	6	6	1	6	4	4	2	5	4
0.827273	1	72	5039	3	2	2	2	2	2	2	3	2	2	2	1	3	5	5	5	2	0	0	1	0	5	5	5	5	5	5	5	5	5	5	5	5	5	5	5	5	5	5	1	5	1	1	1	5	2
0.983333	2	55	678	3	1	4	2	4	1	2	1	2	2	2	3	4	5	3	4	1	0	0	1	0	2	2	2	3	4	3	2	3	2	1	1	1	6	2	6	4	1	4	4	3	7	6	7	5	5
1.46638	2	61	8445	3	2	2	2	5	5	1	1	1	1	1	2	6	6	6	4	2	0	0	1	0	3	5	5	5	3	1	2	3	6	6	6	6	6	6	2	6	2	2	1	6	8	8	8	8	8
0.672245	1	66	1369	3	1	2	2	4	2	1	1	3	3	3	1	6	5	5	5	1	0	0	1	0	5	2	5	4	5	1	2	5	2	2	5	1	3	3	5	5	5	1	1	6	3	4	4	2	4
1.46638	2	63	9450	3	2	4	2	2	1	1	1	2	1	1	4	3	3	3	3	1	0	0	1	0	1	5	1	1	4	3	3	5	5	5	3	3	3	3	3	5	5	3	1	6	8	8	8	8	8
1.46638	2	50	8120	3	2	2	2	1	1	1	1	3	1	1	2	3	5	5	5	2	0	0	1	0	5	5	5	5	2	2	3	5	6	6	6	6	5	1	6	6	6	1	1	6	8	8	8	8	8
1.105	2	48	3115	2	1	1	2	2	2	1	2	1	2	1	4	4	4	4	4	2	0	0	0	1	5	6	5	5	4	4	3	5	4	4	6	3	4	6	4	6	3	2	1	4	3	3	8	3	8
0.672245	1	70	983	3	1	5	2	1	1	3	1	2	1	1	4	1	2	2	2	2	0	0	1	0	3	3	5	5	3	3	3	5	5	4	6	4	2	2	2	6	2	2	4	6	2	4	8	2	5
0.983333	2	72	768	3	1	4	2	4	1	1	1	1	1	1	3	3	3	3	3	2	0	0	1	0	3	4	5	5	2	4	3	2	4	3	6	2	1	3	3	3	3	1	2	3	3	5	3	3	4
0.827273	1	57	4363	3	2	2	2	1	1	1	1	3	1	2	7	4	6	6	6	2	0	0	1	0	5	5	5	5	5	5	5	5	5	6	5	6	6	6	5	5	5	5	1	5	1	1	1	1	1
0.672245	1	68	3514	3	1	5	2	1	1	2	2	4	2	3	4	1	5	1	1	1	0	1	0	0	3	5	3	3	3	3	4	5	4	5	6	1	1	6	4	6	2	5	1	5	3	3	1	4	5
1.46638	2	52	7503	3	2	3	1	5	5	1	1	3	1	1	3	5	4	5	5	2	0	0	1	0	5	5	5	5	4	3	6	5	5	6	5	6	6	2	6	6	5	1	1	6	5	5	2	2	4
1.46638	2	54	6884	3	2	3	2	2	5	1	1	5	2	1	6	2	5	5	5	2	0	0	1	0	5	5	5	5	5	5	5	5	6	6	6	6	6	6	6	6	6	6	6	6	8	8	8	8	8
1.46638	2	68	4708	3	2	3	2	6	5	1	1	5	1	1	2	3	5	5	5	2	0	0	1	0	5	5	5	5	3	3	4	5	6	5	5	5	5	5	5	5	5	4	5	3	8	6	8	8	8
0.827273	1	60	8020	3	2	4	2	4	5	1	2	5	1	2	2	2	3	3	2	1	0	0	1	0	4	1	2	2	5	4	3	5	3	2	1	1	3	1	1	3	2	2	6	6	4	3	8	4	5
1.46638	2	50	7021	3	2	5	2	4	4	2	2	3	2	2	4	3	3	3	3	2	0	0	0	1	4	4	4	4	5	2	2	5	3	3	4	2	6	3	3	4	4	3	3	3	4	4	4	4	4
1.46638	2	51	5534	3	2	4	2	1	1	3	2	3	5	2	3	4	6	6	6	2	0	0	1	0	3	3	3	6	3	3	3	4	4	3	2	6	4	2	6	2	2	3	3	3	4	4	4	4	4
0.827273	1	52	4820	3	2	4	2	1	1	3	2	2	4	3	4	3	3	3	3	1	0	1	0	0	3	3	3	2	5	5	4	5	1	3	1	1	1	5	2	2	3	3	1	4	1	1	4	5	6
0.983333	2	50	595	3	1	4	1	2	1	1	1	1	1	1	3	1	1	2	2	1	0	1	0	0	1	1	1	1	1	1	1	1	1	1	1	1	1	1	1	1	1	1	1	2	6	7	6	7	7
1.46638	2	61	7717	3	2	1	2	1	5	1	1	2	2	1	6	6	3	6	3	2	0	0	0	1	6	6	6	6	6	6	6	6	6	6	6	6	6	6	6	6	6	6	6	6	8	8	8	8	8
0.827273	1	66	5251	3	2	4	2	1	5	1	2	3	1	1	3	3	3	4	4	1	0	0	1	0	4	2	2	2	4	4	4	4	4	2	2	3	3	2	1	2	2	3	1	3	6	5	5	6	5
1.46638	2	52	4812	3	2	4	2	5	1	1	1	1	1	1	4	2	1	2	2	2	0	0	0	1	2	4	3	3	5	3	1	5	2	1	2	2	4	1	2	4	3	1	4	4	6	5	8	6	6
0.983333	2	58	595	3	1	4	2	3	4	2	1	3	2	1	3	4	5	4	4	2	0	0	1	0	4	3	4	3	4	3	3	5	4	3	6	1	1	4	4	3	3	2	1	6	2	2	3	5	4
1.46638	2	62	4020	3	2	4	2	1	1	1	1	1	1	1	3	4	4	4	4	2	0	0	1	0	5	5	6	6	4	3	6	5	5	3	6	1	6	2	6	6	3	1	1	5	8	8	1	8	8
0.672245	1	72	551	3	1	4	2	2	2	2	1	2	1	2	3	2	3	4	4	2	0	0	1	0	5	2	5	4	4	4	4	4	4	3	5	2	2	2	4	4	4	3	1	4	3	3	4	4	3
0.672245	1	71	3050	3	1	5	2	2	1	1	1	3	1	1	1	3	4	5	3	1	0	0	1	0	4	3	4	3	5	3	5	5	5	6	3	2	5	1	3	3	2	3	2	4	2	3	1	1	4
0.827273	1	57	4085	3	2	2	2	1	2	1	1	3	2	2	3	3	3	3	3	2	0	0	1	0	2	3	3	3	2	2	2	2	3	3	3	3	4	3	3	3	3	3	3	3	3	4	4	4	3
0.672245	1	54	687	3	1	5	2	1	4	1	1	1	1	1	3	3	3	2	3	2	0	0	1	0	3	3	5	4	3	3	4	3	4	3	3	2	2	2	2	3	3	3	1	3	5	5	2	6	5
1.46638	2	62	4517	3	2	4	2	2	2	2	1	2	1	1	4	4	1	2	2	2	0	0	1	0	2	2	4	3	2	2	2	4	2	2	2	2	2	2	2	3	2	4	4	2	4	4	4	2	4
0.672245	1	70	692	3	1	3	2	1	2	1	2	2	1	2	3	2	3	3	3	1	0	0	1	0	3	3	3	3	4	3	3	4	3	4	4	3	3	3	4	3	4	3	5	4	2	2	2	2	2
0.983333	2	66	1482	3	1	3	2	5	1	1	2	2	2	2	3	3	3	3	3	2	0	0	0	1	3	3	3	3	6	5	6	6	6	6	6	6	6	6	3	3	6	3	3	3	8	8	8	8	8
0.983333	2	60	3233	3	1	1	2	5	5	2	2	3	1	1	4	3	2	2	3	1	0	0	1	0	2	2	6	5	6	1	2	5	2	2	2	1	1	3	1	3	3	2	1	2	5	5	5	3	5
0.827273	1	59	4817	3	2	2	2	1	1	2	2	5	5	5	4	5	5	5	1	2	0	0	1	0	5	5	5	5	6	6	6	6	6	6	6	6	6	6	6	6	6	6	6	6	8	8	8	8	8
1.46638	2	54	4022	3	2	3	2	1	5	1	1	1	1	1	3	6	2	2	2	2	0	0	1	0	2	2	5	5	1	1	1	6	6	2	2	2	4	2	2	2	2	2	2	6	8	8	8	8	8
0.672245	1	56	1052	3	1	4	2	2	5	1	2	3	2	4	4	4	5	5	5	1	0	0	0	1	5	4	5	5	5	4	5	5	5	5	5	1	5	1	3	6	3	5	1	6	1	1	1	1	1
0.983333	2	50	1383	3	1	5	2	1	1	1	1	1	1	1	4	3	2	2	2	1	0	0	1	0	3	3	6	5	6	3	5	5	3	3	6	1	1	6	2	6	6	2	6	6	7	7	4	7	7
0.827273	1	54	9950	3	2	4	2	1	1	1	1	2	1	1	3	3	2	3	4	1	0	1	0	0	3	3	4	2	3	3	2	3	3	2	3	1	5	1	1	1	2	1	1	3	4	4	4	3	4
0.672245	1	61	3188	3	1	2	2	5	5	1	1	1	1	1	4	1	6	6	6	2	0	0	1	0	5	5	6	5	1	1	1	1	2	1	1	1	1	5	2	2	2	1	5	1	7	7	8	8	7
1.18171	1	36	7014	2	2	4	2	1	1	2	2	2	1	2	2	3	3	3	3	1	0	1	0	0	3	3	2	1	2	1	1	5	2	2	1	3	3	2	1	1	3	2	3	2	4	4	4	4	4
0.672245	1	52	783	3	1	1	2	4	1	3	1	1	2	1	2	3	5	5	5	1	0	0	1	0	5	4	3	3	4	1	1	5	2	3	6	1	5	1	5	2	2	1	1	6	2	2	2	1	4
1.46638	2	62	4630	3	2	4	2	4	4	1	1	2	2	1	4	3	3	3	3	1	0	1	0	0	3	4	4	4	4	2	3	4	3	4	4	2	2	2	3	3	3	2	1	4	6	6	5	6	5
0.983333	2	63	2150	3	1	4	2	5	5	2	1	3	1	2	4	1	3	3	3	1	0	0	1	0	5	5	3	3	4	4	2	5	4	5	6	1	1	6	2	4	2	4	2	4	8	8	8	8	8
0.983333	2	56	2848	3	1	4	1	1	5	1	1	4	2	2	2	6	5	5	5	2	0	0	1	0	5	6	6	6	1	1	5	5	3	3	3	6	6	6	6	6	6	6	1	6	3	4	3	2	3
1.46638	2	62	9012	3	2	4	2	3	2	1	1	1	2	1	3	2	6	6	6	2	0	0	1	0	3	3	3	3	3	2	3	3	3	2	3	3	2	2	2	3	3	2	3	2	5	5	5	5	5
1.46638	2	64	5239	3	2	5	2	1	1	1	1	4	1	1	1	1	3	3	5	2	0	0	1	0	2	3	3	5	1	1	3	5	3	3	3	1	1	1	3	1	1	1	1	3	4	4	4	1	1
0.672245	1	73	2836	3	1	1	2	1	2	1	2	2	1	1	4	3	2	2	2	2	0	0	1	0	2	2	3	3	3	2	1	3	3	2	3	3	6	1	2	3	2	1	6	3	6	5	5	2	5
1.46638	2	63	4633	3	2	4	2	1	1	2	1	4	2	2	3	4	5	5	3	2	0	0	1	0	5	5	5	5	4	3	5	4	5	6	6	1	6	3	2	4	3	4	2	6	5	3	8	8	6
0.827273	1	59	5053	3	2	4	2	1	5	1	1	1	1	1	5	3	3	3	3	2	0	0	1	0	6	6	6	4	4	4	3	5	6	2	6	6	6	6	2	6	2	6	6	6	8	8	8	8	8
0.983333	2	72	1433	3	1	4	2	1	5	1	1	1	1	1	4	3	2	2	2	2	0	0	1	0	3	3	4	4	3	3	3	4	3	3	3	2	3	3	2	3	2	3	3	6	8	8	8	8	8
1.46638	2	62	5427	3	2	2	2	2	1	2	2	3	2	2	4	4	4	4	4	2	0	0	1	0	5	5	5	5	4	3	5	5	5	5	6	6	6	6	6	6	6	6	1	6	8	8	8	1	8
0.672245	1	63	1807	3	1	2	2	1	1	1	1	2	2	1	4	3	3	3	3	2	0	0	1	0	3	3	5	3	3	3	3	5	5	3	5	3	3	2	4	6	4	3	2	3	4	4	4	4	5
1.46638	2	59	6412	3	2	4	2	3	2	2	1	1	1	1	4	3	3	4	4	2	0	0	1	0	5	3	5	4	4	1	1	5	4	4	3	2	2	3	2	4	3	1	1	3	5	5	4	4	4
0.983333	2	71	1639	3	1	5	2	1	1	1	1	2	1	1	4	3	3	2	2	2	0	0	0	1	3	3	3	3	3	6	6	5	3	3	1	2	1	3	2	2	2	3	3	6	5	4	5	5	5
0.827273	1	61	8003	3	2	1	2	2	1	1	1	3	1	2	4	2	2	3	3	1	0	0	1	0	2	3	4	3	4	1	1	4	3	2	2	2	4	2	1	2	1	2	2	2	4	7	3	3	4
0.983333	2	74	785	3	1	5	2	1	5	1	1	1	2	2	4	2	2	2	3	1	0	0	1	0	3	1	2	2	2	1	1	5	2	1	1	1	2	2	1	1	2	1	1	3	3	3	8	4	7
1.08976	2	41	5081	2	2	4	2	6	1	2	2	2	2	2	3	3	6	6	6	2	0	0	1	0	6	6	6	6	3	3	3	6	6	2	6	6	6	6	6	6	6	6	6	3	8	8	8	8	8
0.827273	1	66	8622	3	2	4	2	6	6	2	2	3	1	3	3	3	4	4	4	2	0	0	0	1	6	6	6	6	6	6	6	6	6	6	6	6	6	6	6	6	6	6	6	6	8	8	8	8	8
0.983333	2	50	2020	3	1	4	2	1	2	1	1	1	1	1	4	3	2	2	4	2	0	0	1	0	3	3	4	4	2	1	1	1	6	6	6	6	6	6	2	4	4	1	1	2	6	7	8	6	5
1.46638	2	70	4550	3	2	3	2	1	4	1	1	4	1	1	4	3	4	3	4	1	0	0	1	0	5	4	4	5	5	3	3	5	2	4	6	1	1	3	2	2	3	2	1	6	3	5	3	4	5
0.983333	2	62	3083	3	1	4	2	1	2	1	1	1	1	1	4	3	2	3	5	1	1	0	0	0	2	2	1	1	1	1	2	5	1	1	1	3	2	1	1	2	1	1	4	2	7	6	6	6	7
1.46638	2	65	6414	3	2	4	2	3	4	1	1	1	1	1	3	3	3	4	3	2	0	0	1	0	4	4	3	3	3	4	2	3	6	3	6	6	6	6	2	6	3	1	5	2	4	2	3	2	4
0.827273	1	72	8646	3	2	2	2	3	5	3	2	3	2	4	3	4	5	5	4	2	0	0	1	0	5	5	5	4	5	5	5	5	5	5	5	3	4	6	5	5	3	6	1	4	2	2	3	4	4
0.983333	2	60	171	3	1	4	2	1	1	1	1	5	1	1	4	3	6	6	6	1	0	0	1	0	5	5	5	5	6	6	6	6	5	5	6	1	6	6	1	6	6	6	6	6	3	3	1	4	3
0.983333	2	58	986	3	1	2	2	1	1	1	1	2	2	2	3	4	4	2	2	2	0	0	1	0	5	5	5	5	2	2	4	4	6	6	6	6	6	6	6	6	6	6	6	6	8	8	8	8	8
0.672245	1	71	1487	3	1	2	2	1	5	2	1	3	2	2	1	3	5	5	5	1	0	0	1	0	4	2	2	2	5	4	3	5	3	2	2	1	2	3	4	5	4	3	1	6	4	4	4	4	4
1.46638	2	53	8475	3	2	4	2	1	2	1	1	2	5	2	4	3	2	6	6	2	0	0	1	0	1	4	5	3	3	3	3	5	3	2	4	5	4	1	3	2	2	2	5	2	7	7	4	5	5
0.983333	2	60	194	3	1	2	2	2	1	2	2	2	2	2	3	4	4	4	4	2	0	0	0	1	4	4	4	4	3	3	3	5	4	3	6	3	3	2	2	2	3	2	2	3	5	5	5	4	6
0.983333	2	73	1	3	1	4	2	1	4	1	1	1	1	1	3	4	3	3	3	2	0	0	0	1	4	4	2	4	4	4	3	4	4	3	3	1	2	3	2	6	3	2	3	6	2	2	2	2	2
0	1	56	0	3	#NULL!	5	2	1	5	1	1	1	1	3	4	4	2	2	2	1	0	0	1	0	3	2	4	3	2	1	2	5	2	2	4	2	4	1	1	4	2	4	6	6	5	3	6	3	6
1.46638	2	54	9024	3	2	5	2	4	4	1	1	2	2	1	4	2	2	2	2	1	0	1	0	0	2	2	4	4	5	3	2	4	6	6	6	2	6	3	2	6	2	2	2	6	5	4	5	5	5
0.672245	1	67	1251	3	1	5	2	1	5	1	1	1	2	2	3	2	5	4	5	1	0	0	1	0	5	5	4	5	4	2	4	5	5	4	2	3	3	1	3	3	2	2	1	3	2	4	2	5	5
0.983333	2	72	678	3	1	4	2	2	2	1	1	2	1	1	4	3	3	3	3	1	0	0	0	1	3	3	3	3	3	3	2	5	3	3	3	3	2	3	2	6	6	2	6	6	8	8	8	8	8
0.983333	2	70	1452	3	1	3	2	1	5	1	1	2	2	1	3	3	4	4	4	2	0	0	0	1	3	3	4	4	3	4	3	5	4	6	6	3	6	3	3	4	3	2	1	6	3	4	8	4	3
0.983333	2	50	2013	3	1	5	2	1	1	1	2	2	2	2	4	3	3	3	3	1	0	0	1	0	2	4	5	5	5	5	4	5	3	2	6	2	2	4	1	6	1	5	4	6	7	3	7	7	7
0.827273	1	64	8170	3	2	3	2	2	2	1	1	2	1	1	3	2	2	2	3	1	0	1	0	0	3	2	2	3	1	2	2	4	2	1	2	2	3	2	2	4	2	1	3	2	5	5	4	4	4
0.983333	2	73	3340	3	1	3	2	2	1	1	1	2	1	1	3	3	3	6	6	2	0	0	1	0	4	3	4	2	6	4	1	3	3	3	4	6	3	2	3	6	2	2	6	3	5	4	5	8	4
0.672245	1	66	3880	3	1	4	2	2	5	1	2	2	1	1	4	3	2	3	3	1	0	0	1	0	2	5	5	2	2	2	3	5	3	2	3	1	2	5	1	3	1	1	3	6	6	6	5	4	6
1.46638	2	62	7020	3	2	2	2	1	5	1	1	1	2	2	2	4	5	4	4	2	0	0	1	0	5	5	5	5	3	3	4	4	5	4	3	3	2	6	3	4	3	2	2	2	5	4	8	3	5
0.672245	1	58	3770	3	1	2	2	2	5	1	2	2	2	1	2	5	5	5	5	2	0	0	0	1	5	5	5	5	5	5	5	5	6	6	6	6	6	6	6	6	6	6	6	6	8	8	8	8	8
0.827273	1	72	6893	3	2	5	2	1	5	1	1	2	1	1	4	1	1	3	3	2	0	1	0	0	3	3	5	2	1	2	1	5	4	3	1	1	5	3	4	1	3	3	2	4	5	4	3	4	6
0.672245	1	51	1263	3	1	5	2	1	1	1	1	2	1	1	4	3	3	3	3	1	0	0	1	0	3	3	2	2	4	2	2	5	2	1	3	2	2	3	3	3	3	2	1	3	6	6	4	4	6
1.46638	2	67	4638	3	2	1	2	1	5	2	1	2	1	1	4	4	2	3	4	2	0	0	1	0	4	4	4	3	2	2	3	4	3	2	2	1	2	2	3	6	2	2	2	3	5	4	6	3	6
0.827273	1	69	7540	3	2	5	2	3	2	2	2	2	1	2	4	3	3	4	5	1	0	0	1	0	4	5	5	5	4	4	4	5	5	5	3	1	1	2	2	4	2	1	1	1	4	5	1	1	5
0.983333	2	68	1709	3	1	3	2	1	5	1	2	1	2	2	3	4	5	5	5	2	0	0	1	0	5	5	5	5	4	3	4	5	5	6	5	4	5	4	3	5	4	5	1	6	4	4	8	6	5
0.983333	2	54	3580	3	1	4	2	2	2	1	1	2	1	1	3	4	3	3	3	2	0	0	1	0	4	5	4	4	6	3	3	5	6	6	6	3	6	3	3	6	6	3	3	3	3	5	4	2	4
0.983333	2	60	2008	3	1	1	2	1	5	2	1	3	2	2	7	6	6	6	6	2	0	0	1	0	6	6	6	6	6	6	6	6	6	6	6	6	6	6	6	6	6	6	6	6	8	8	8	8	8
0.827273	1	59	8622	3	2	1	2	3	5	1	1	2	2	1	3	2	5	5	5	1	0	0	1	0	3	2	5	5	1	1	1	5	5	4	2	1	1	1	2	3	3	1	1	3	4	5	3	4	5
0.672245	1	63	3173	3	1	4	2	4	3	2	2	2	1	2	3	4	2	2	3	1	0	1	0	0	2	4	3	2	3	2	4	5	3	4	6	2	1	4	1	2	3	2	1	6	8	5	8	2	5
0.827273	1	73	8022	3	2	4	2	1	5	1	1	3	2	1	3	4	6	6	6	2	0	0	1	0	5	5	3	5	4	3	6	5	3	2	3	2	2	2	3	3	3	3	3	6	2	5	5	2	5
0.672245	1	67	363	3	1	4	2	1	1	1	1	2	1	1	3	3	3	3	3	2	0	0	1	0	3	3	2	3	2	2	3	3	2	2	1	1	1	3	1	1	2	2	3	3	5	4	5	5	6
0	2	63	#NULL!	3	#NULL!	4	2	1	5	1	1	2	1	1	4	4	2	2	3	2	0	0	1	0	3	3	4	3	3	3	4	5	3	2	3	4	2	3	2	3	2	4	2	3	5	6	4	4	6
1.46638	2	71	4639	3	2	4	2	1	5	1	1	1	1	2	4	4	2	3	4	2	0	0	1	0	2	2	4	4	3	3	3	4	2	1	1	1	1	2	1	2	2	1	2	6	8	8	8	8	8
0.672245	1	50	858	3	1	5	2	5	2	1	2	2	3	3	4	3	2	2	2	1	0	0	1	0	2	3	1	1	4	3	2	4	1	2	3	1	3	3	1	3	1	2	4	3	5	5	4	4	7
1.46638	2	58	6013	3	2	5	2	3	1	1	1	1	1	2	4	4	2	2	5	1	0	1	0	0	1	4	5	5	1	2	1	5	2	3	4	1	1	2	1	2	2	4	2	2	4	2	3	6	4
0.983333	2	65	1157	3	1	4	2	2	1	1	1	1	1	1	4	5	3	3	4	2	0	0	1	0	6	6	5	3	1	1	6	6	6	2	1	1	6	2	2	6	2	2	6	6	5	5	8	5	5
0.983333	2	70	2020	3	1	4	2	2	5	1	1	3	1	1	3	2	2	2	3	2	0	0	1	0	2	4	2	5	2	1	6	4	2	3	1	1	1	1	2	2	2	1	1	2	5	5	4	7	4
0.827273	1	59	5178	3	2	5	2	1	6	1	1	3	1	2	2	4	5	5	5	2	0	0	1	0	5	6	5	5	3	3	2	4	5	5	6	5	3	3	5	4	2	2	2	5	8	6	1	8	6
0.983333	2	58	1779	3	1	2	2	5	5	1	1	2	2	1	6	6	5	1	1	2	0	0	1	0	5	5	5	5	4	5	4	5	5	6	6	6	6	6	5	5	5	5	5	6	8	8	8	8	8
1.06893	1	34	596	1	1	5	2	1	1	1	1	1	2	2	5	3	6	2	3	1	0	0	1	0	2	2	6	4	5	4	3	6	2	2	6	1	2	4	1	1	1	4	2	6	6	5	5	7	6
0.983333	2	58	1151	3	1	3	2	1	1	1	1	4	1	1	3	3	5	5	5	2	0	0	1	0	5	5	5	5	6	6	6	6	5	5	5	5	5	5	5	5	6	6	5	5	1	1	1	1	1
1.46638	2	75	8610	3	2	4	2	6	6	1	1	1	1	1	4	3	2	3	3	2	0	0	0	1	2	2	3	3	3	2	6	5	2	2	1	1	6	1	6	2	2	1	1	4	8	5	8	4	8
0.827273	1	51	6409	3	2	2	2	1	2	1	1	4	1	1	3	3	5	3	2	2	1	0	0	0	2	5	5	5	3	1	2	5	3	5	4	1	1	1	3	1	1	1	1	1	1	1	5	1	6
0.983333	2	60	1920	3	1	4	2	1	1	1	1	1	1	1	3	3	2	2	2	2	0	0	1	0	2	3	3	2	2	2	3	2	3	2	2	2	2	2	2	4	2	2	2	3	5	3	4	4	5
0.983333	2	50	1386	3	1	3	2	5	4	1	2	1	1	1	4	6	3	3	3	2	0	0	1	0	3	3	2	2	3	3	2	5	2	2	1	2	3	3	2	3	2	2	4	6	8	4	4	2	4
0.827273	1	74	8226	3	2	1	2	1	1	1	2	2	1	1	3	4	3	3	3	2	0	0	1	0	6	6	6	6	6	6	6	6	6	6	6	6	6	6	6	6	6	6	6	6	8	8	8	8	8
0.983333	2	66	1900	3	1	2	2	1	1	1	2	2	2	2	2	3	3	3	3	2	0	0	1	0	3	3	3	4	3	3	6	6	3	3	3	2	3	3	3	2	3	2	4	3	8	8	8	6	5
0.672245	1	58	1727	3	1	5	2	1	1	2	1	1	1	3	4	3	3	4	5	2	0	0	1	0	3	4	5	5	3	3	4	5	4	3	1	1	4	1	2	4	3	2	1	3	5	4	6	3	5
1.46638	2	67	6777	3	2	4	2	1	1	1	1	2	1	1	7	3	3	4	5	2	0	0	1	0	4	4	4	4	5	3	5	3	6	3	3	2	6	1	6	6	6	2	5	6	4	4	2	4	3
1.18171	1	47	5221	2	2	2	2	4	2	1	1	1	1	1	4	5	6	6	6	2	0	0	0	1	1	1	5	5	5	5	2	5	3	6	1	1	6	6	1	2	1	3	4	1	8	8	8	8	8
0.983333	2	50	1482	3	1	4	2	1	1	1	1	1	1	1	3	4	5	5	5	2	0	0	1	0	6	6	6	6	6	1	6	6	6	6	6	1	6	6	6	6	6	6	6	6	2	2	2	2	2
0.672245	1	51	870	3	1	4	2	6	1	1	2	1	1	2	4	3	3	2	1	1	0	0	1	0	1	6	6	5	6	1	6	6	2	6	6	1	6	6	3	6	6	5	5	5	8	8	8	8	8
0.672245	1	52	2000	3	1	5	2	2	1	1	1	1	2	2	4	1	2	4	4	1	0	1	0	0	2	2	2	2	3	1	2	3	1	1	3	1	4	2	2	3	2	4	4	2	5	5	5	5	6
0.672245	1	72	2019	3	1	4	2	1	1	2	2	2	2	2	3	3	3	3	4	2	0	0	1	0	5	5	5	5	3	4	3	5	5	4	5	4	3	3	3	6	3	2	1	6	8	8	8	8	8
0.672245	1	67	969	3	1	2	2	1	5	2	2	4	1	1	1	3	5	5	5	1	0	0	1	0	5	5	5	5	5	5	5	5	5	5	5	5	5	5	5	5	5	5	1	5	8	1	8	8	8
0.983333	2	51	3550	3	1	3	1	1	1	1	1	1	1	1	3	2	2	3	4	1	0	1	0	0	2	5	5	5	2	1	1	4	3	2	1	1	6	1	6	4	1	1	1	2	7	7	8	5	5
0.827273	1	65	9409	3	2	2	2	3	3	1	1	2	1	1	3	3	3	3	3	2	0	0	1	0	5	5	5	5	5	6	5	6	5	5	5	2	6	1	2	1	3	1	1	6	3	3	2	1	4
0.672245	1	62	2010	3	1	1	2	1	1	1	2	2	2	2	3	4	4	4	5	2	0	0	0	1	5	4	4	5	4	4	4	4	6	6	6	6	4	6	6	5	4	6	1	6	8	8	8	8	8
0.827273	1	73	9007	3	2	5	2	2	3	2	1	2	1	2	7	3	2	2	2	2	0	0	0	1	2	3	4	3	3	3	3	3	6	2	4	2	2	2	2	6	6	4	3	3	4	4	4	4	5
0.827273	1	71	8050	3	2	1	2	1	1	1	1	1	1	1	3	2	2	2	3	1	0	0	1	0	6	6	6	6	6	3	6	5	5	4	2	2	6	4	6	6	3	1	1	3	1	1	1	1	1
1.46638	2	58	8530	3	2	2	2	1	5	2	2	3	4	2	3	6	5	5	5	2	0	0	1	0	5	5	5	5	5	5	5	5	5	5	5	5	4	5	5	5	5	5	5	6	1	1	1	1	1
0.983333	2	57	1430	3	1	5	2	1	1	1	1	2	1	1	4	4	2	2	1	2	0	0	1	0	2	3	3	4	3	3	3	5	2	2	4	2	4	4	4	4	2	4	4	4	4	4	3	5	5
0.983333	2	72	1366	3	1	5	2	2	1	3	2	3	1	2	4	3	3	3	2	2	0	0	1	0	3	3	5	5	4	3	4	4	3	4	3	3	5	1	2	3	3	3	3	3	3	3	1	1	5
0.672245	1	73	2480	3	1	3	2	1	1	2	2	3	3	2	2	3	4	4	4	1	0	0	1	0	4	4	4	3	5	5	5	5	5	5	5	5	5	6	5	5	5	5	1	5	8	8	8	8	8
0.983333	2	65	3513	3	1	5	2	5	3	1	1	2	1	1	3	3	5	5	4	1	0	0	1	0	5	5	5	5	5	5	5	5	5	5	5	5	5	5	6	6	6	6	1	4	8	8	8	8	8
0.827273	1	68	4001	3	2	1	2	2	2	1	1	1	5	1	3	6	3	3	3	2	0	0	1	0	5	5	5	5	5	4	5	4	6	6	6	6	6	6	6	6	3	3	3	6	5	5	4	4	4
0.827273	1	67	6843	3	2	5	2	5	2	2	1	3	2	2	4	3	3	3	3	1	0	0	1	0	3	3	3	3	6	4	6	4	6	6	6	6	6	6	3	6	6	4	6	3	6	6	8	4	6
0.827273	1	74	9023	3	2	5	2	1	1	2	2	2	2	2	3	3	4	4	4	2	0	0	0	1	4	4	4	4	4	4	4	4	5	5	5	5	5	5	3	5	5	2	1	6	3	3	3	3	3
0.983333	2	74	1384	3	1	4	2	5	1	1	1	2	1	2	5	4	4	4	4	2	0	0	1	0	3	4	4	4	5	3	6	5	4	6	6	3	6	6	2	6	6	6	2	2	8	5	8	1	5
1.08976	2	47	5301	2	2	3	2	4	1	1	2	3	1	3	3	4	3	3	3	2	0	0	1	0	4	4	4	4	6	6	6	5	5	5	6	6	2	2	3	6	3	2	2	5	1	1	1	1	1
0.672245	1	70	1430	3	1	4	3	5	5	1	1	4	1	1	6	6	5	5	5	2	0	0	1	0	5	5	5	5	3	3	3	3	5	5	5	5	6	1	6	6	6	6	1	5	1	1	1	1	1
1.46638	2	71	4010	3	2	4	2	1	1	1	2	3	2	2	2	3	5	5	5	2	0	0	1	0	3	3	1	1	3	2	3	5	5	3	1	1	3	2	3	5	5	2	1	5	5	5	3	5	5
0.827273	1	66	6011	3	2	3	2	2	4	1	2	2	1	1	3	3	3	4	4	2	0	0	1	0	5	5	5	5	5	5	5	5	5	3	5	6	5	1	4	5	4	3	1	6	4	4	4	4	4
0.827273	1	57	4886	3	2	3	2	5	5	2	2	4	2	2	2	2	5	5	5	2	0	0	1	0	5	5	5	5	3	4	6	5	5	5	5	6	5	6	5	5	5	6	1	6	8	8	8	8	1
0.827273	1	67	7078	3	2	4	2	5	1	1	1	3	1	2	2	3	4	4	4	1	0	0	1	0	4	4	5	5	4	3	3	5	5	4	4	4	6	2	4	4	4	2	1	4	2	4	3	2	4
0.672245	1	68	3942	3	1	4	2	4	5	1	1	3	1	1	3	3	5	5	5	2	0	0	1	0	5	5	5	5	5	5	5	5	5	4	5	1	3	1	5	5	5	3	5	5	2	2	1	2	2
0.672245	1	64	2436	3	1	4	2	2	5	1	1	1	1	1	2	3	3	3	3	2	0	0	1	0	3	3	3	3	3	3	3	4	6	3	6	1	6	6	3	2	6	1	1	3	5	6	2	4	6
1.46638	2	57	4313	3	2	4	2	2	1	1	1	2	1	2	3	4	2	2	3	2	0	1	0	0	2	3	5	2	2	3	3	5	5	3	3	2	2	4	2	3	1	2	2	3	5	5	3	5	5
0.672245	1	74	2407	3	1	4	2	1	1	1	1	2	1	1	3	3	3	3	2	1	0	0	1	0	3	3	3	3	3	3	4	5	3	3	3	3	5	1	2	3	2	2	3	3	4	5	4	5	4
0.672245	1	66	1463	3	1	4	2	3	2	2	2	2	1	2	3	3	3	4	4	1	0	1	0	0	4	3	3	2	3	2	4	6	2	2	4	2	2	4	2	2	1	3	2	2	5	5	3	3	5
1.19483	1	39	1960	2	1	2	2	2	5	1	1	4	1	2	2	3	3	4	5	1	0	0	1	0	5	4	2	1	5	2	4	5	3	5	4	1	2	2	2	2	1	1	1	4	5	5	4	2	4
0.983333	2	50	464	3	1	4	2	4	1	1	1	2	2	2	3	4	2	2	3	2	0	0	1	0	3	4	4	4	3	2	2	4	3	2	6	2	4	2	1	3	3	2	3	3	4	5	2	5	5
1.46638	2	64	4250	3	2	3	2	1	1	1	1	2	1	2	3	3	3	3	3	1	0	0	1	0	3	3	3	3	4	4	3	3	3	3	3	3	3	2	3	3	3	3	3	3	6	6	5	6	5
0.983333	2	52	3187	3	1	5	2	1	1	1	1	2	1	1	3	3	2	2	2	1	0	0	1	0	2	2	5	4	5	2	3	5	3	3	2	1	6	1	1	3	1	1	6	3	4	4	3	4	5
1.46638	2	55	4620	3	2	3	2	1	5	1	1	1	1	2	3	3	2	3	3	2	0	0	1	0	3	3	3	2	2	3	5	3	3	1	1	2	2	2	2	2	2	1	1	3	4	5	4	3	4
1.46638	2	56	4020	3	2	4	2	4	4	2	1	2	1	1	4	3	3	4	4	2	0	0	1	0	2	4	4	6	4	5	3	5	5	2	6	2	6	2	3	4	3	4	1	6	5	4	8	7	6
1.08976	2	41	4790	2	2	4	2	1	5	2	3	4	3	2	3	4	5	5	5	2	0	0	1	0	5	5	5	5	5	5	5	5	5	5	5	5	5	3	5	5	5	5	1	3	1	1	1	1	1
0.827273	1	64	7024	3	2	4	2	2	4	1	1	2	2	1	4	3	2	2	2	1	0	1	0	0	2	2	4	5	4	2	3	5	3	3	1	2	2	2	1	1	1	4	4	3	6	5	8	6	6
0.983333	2	54	2409	3	1	2	2	1	1	1	1	2	1	1	4	4	6	2	6	1	0	0	1	0	1	2	5	5	2	3	3	5	3	2	3	2	6	1	2	4	3	2	1	6	8	8	7	7	7
0.827273	1	58	9700	3	2	3	2	3	2	5	2	5	2	1	3	5	5	5	5	2	0	0	1	0	5	5	5	5	5	5	4	5	5	5	5	5	5	4	6	6	6	6	6	6	8	8	8	8	8
0.827273	1	61	7091	3	2	2	2	1	5	1	2	5	2	1	3	3	3	3	3	2	0	0	1	0	6	6	6	6	5	6	4	5	5	5	6	1	1	1	1	3	6	3	2	2	8	8	8	8	8
1.46638	2	58	4580	3	2	1	2	1	1	1	1	1	2	1	4	3	3	3	2	2	0	0	0	1	3	3	3	5	6	3	3	5	3	1	6	6	6	6	6	6	6	6	1	6	8	8	8	8	8
0.672245	1	62	2770	3	1	4	2	1	4	1	1	3	2	1	3	2	3	3	4	1	0	0	1	0	3	3	4	4	3	1	2	3	2	3	2	2	3	2	2	2	2	2	2	3	4	5	5	5	5
0.827273	1	60	4624	3	2	3	2	1	1	1	1	2	1	2	2	4	2	2	2	1	0	0	1	0	2	2	4	3	1	1	3	4	3	2	3	2	2	1	3	4	2	2	3	3	3	3	4	3	4
0.672245	1	59	3731	3	1	4	2	3	3	2	2	3	1	1	3	4	4	4	5	1	0	0	1	0	3	4	5	5	5	5	5	5	3	3	6	1	4	2	5	6	6	6	2	2	4	4	3	2	3
1.12826	2	30	6008	1	2	4	2	1	5	1	4	5	2	2	5	2	2	3	3	1	0	0	1	0	3	3	2	2	3	3	2	4	3	3	2	1	6	6	2	3	2	2	2	6	3	4	5	5	5
0.983333	2	59	674	3	1	4	2	4	4	2	2	2	2	2	3	3	5	4	4	1	0	0	1	0	3	3	5	2	3	2	3	6	4	6	6	3	5	2	6	6	6	2	2	3	3	3	3	5	2
0.672245	1	55	3370	3	1	2	1	1	2	1	1	2	1	1	2	2	2	2	3	2	0	0	1	0	3	2	5	3	3	2	3	3	4	3	4	2	2	2	1	1	1	2	1	5	5	5	3	5	4
0.983333	2	50	551	3	1	5	2	1	1	1	1	1	1	1	4	3	3	2	3	2	0	0	1	0	2	3	3	4	3	2	3	4	3	3	3	1	2	2	2	2	2	2	4	2	5	5	5	5	5
0.672245	1	67	3120	3	1	5	2	1	1	1	1	1	1	1	4	5	6	6	6	1	0	0	1	0	5	5	5	5	4	4	4	4	5	6	6	6	6	1	6	6	6	6	6	3	5	5	4	5	5
0.672245	1	69	1364	3	1	4	2	2	3	2	1	3	3	2	2	4	5	5	5	1	0	1	0	0	2	3	5	5	5	5	5	5	5	5	2	1	3	2	3	3	3	2	1	6	4	4	4	6	6
0.827273	1	66	6036	3	2	2	2	1	3	1	1	4	1	1	1	3	5	5	5	2	0	0	1	0	5	5	5	5	5	5	5	5	5	1	5	5	5	6	5	5	5	5	1	5	1	7	1	1	1
1.12826	2	25	4639	1	2	3	2	2	1	3	2	2	2	2	3	4	3	3	2	2	0	1	0	0	2	3	5	2	4	3	4	4	3	3	2	2	3	4	3	4	3	2	3	3	4	5	5	5	4
0	2	63	0	3	#NULL!	5	2	6	5	2	1	2	1	2	4	3	3	3	3	1	0	0	1	0	3	3	3	3	5	5	5	5	3	3	6	2	2	3	3	3	3	3	6	6	8	8	4	4	4
0.672245	1	70	2080	3	1	3	2	2	2	2	1	2	2	2	3	3	4	4	4	2	0	0	1	0	5	5	4	4	5	5	5	5	5	5	5	2	5	1	5	5	5	3	1	5	4	2	2	6	6
0.827273	1	53	5174	3	2	3	2	1	2	2	2	3	1	3	4	4	4	5	5	2	0	0	1	0	3	3	4	4	3	3	3	4	4	6	6	6	6	6	6	3	6	6	3	4	5	5	3	5	5
0.827273	1	65	7120	3	2	5	2	1	5	1	1	2	1	1	4	3	2	2	2	1	0	0	1	0	2	3	5	2	3	1	2	4	2	2	2	1	2	2	2	3	1	2	4	3	6	5	5	6	7
0.672245	1	68	3744	3	1	4	2	2	1	1	2	2	1	1	2	3	5	5	5	2	0	0	1	0	5	5	5	5	3	4	3	2	5	4	6	6	6	6	6	6	3	6	6	4	3	4	2	4	4
0.827273	1	64	6450	3	2	5	1	2	2	1	1	3	1	1	4	1	3	3	3	1	0	0	1	0	3	3	4	3	1	2	2	4	2	3	2	1	1	2	2	3	2	3	2	3	5	6	5	6	5
0.672245	1	60	2312	3	1	2	2	3	2	1	1	5	1	1	7	4	3	4	6	2	0	1	0	0	3	3	4	4	3	3	6	4	3	3	4	2	6	2	2	6	2	2	3	6	8	5	8	5	5
0.983333	2	62	678	3	1	5	1	1	1	1	1	1	2	1	3	3	4	4	4	1	0	0	1	0	5	5	5	5	3	3	5	5	4	4	4	4	3	2	6	4	3	3	1	4	5	5	3	3	5
1.08976	2	42	5542	2	2	4	2	2	1	1	1	2	1	1	4	2	2	4	2	1	0	1	0	0	3	4	2	3	4	1	4	5	3	3	2	1	4	2	2	6	1	3	4	3	4	4	2	1	4
1.18171	1	37	5518	2	2	5	2	2	1	2	2	1	2	2	4	4	4	4	4	1	0	0	1	0	4	4	4	5	4	3	4	4	4	2	2	2	6	6	2	2	2	2	2	6	5	5	4	6	5
1.19483	1	38	170	2	1	5	2	4	2	1	2	5	1	1	2	3	3	3	3	1	0	1	0	0	3	3	4	4	4	3	3	4	3	6	4	4	6	2	2	5	6	3	6	6	3	4	8	2	2
1.18171	1	43	5919	2	2	4	2	2	1	2	2	2	2	2	4	4	2	3	3	1	0	0	1	0	3	3	3	3	3	2	3	4	2	3	3	3	3	3	2	2	2	2	4	6	5	5	5	3	5
1.105	2	39	1406	2	1	4	2	1	4	1	1	1	1	1	4	3	3	3	3	1	0	1	0	0	2	1	2	2	4	3	3	4	3	1	2	3	3	3	3	3	6	3	3	2	3	3	4	3	4
1.18171	1	48	5057	2	2	5	2	4	3	1	1	3	1	2	4	2	3	4	4	1	0	0	1	0	4	2	3	2	3	3	2	5	3	3	2	4	2	3	3	4	3	4	2	4	5	5	5	5	5
1.08976	2	47	5037	2	2	3	2	1	5	1	1	2	1	1	2	3	2	3	3	1	0	0	1	0	2	3	3	3	2	2	3	3	2	1	2	4	3	2	3	6	2	2	2	2	6	6	5	5	6
1.105	2	47	1253	2	1	5	2	2	5	1	5	2	2	5	3	4	4	3	4	2	0	0	1	0	5	4	5	5	5	5	3	5	5	3	3	6	6	6	4	6	4	5	1	6	4	4	4	4	4
1.105	2	45	3409	2	1	4	2	3	2	2	2	2	1	2	3	3	5	5	5	1	0	0	1	0	5	3	5	3	5	1	1	5	3	3	1	1	2	1	2	2	3	2	1	4	3	3	3	5	4
1.19483	1	38	3726	2	1	4	2	2	2	3	3	3	2	3	3	3	4	3	2	2	0	0	1	0	4	3	4	4	3	3	3	2	3	2	4	3	4	3	2	2	2	2	4	3	3	6	3	4	4
1.105	2	45	1339	2	1	4	2	1	1	2	1	1	2	2	4	4	2	2	3	1	0	0	1	0	2	5	5	4	5	5	5	5	6	4	4	2	2	6	2	4	2	4	2	1	3	3	8	5	6
1.08976	2	45	8149	2	2	3	2	1	2	1	1	1	1	1	4	5	2	3	3	1	0	1	0	0	2	3	3	3	4	2	3	5	3	2	4	3	3	1	2	3	2	2	4	3	6	6	5	7	6
0	1	46	#NULL!	2	#NULL!	5	2	1	1	1	2	5	2	1	2	3	3	4	5	1	0	1	0	0	3	6	4	5	3	3	6	5	4	3	6	6	6	3	3	6	3	2	4	1	3	5	5	1	2
0	2	39	#NULL!	2	#NULL!	4	2	1	3	1	1	2	1	1	5	2	1	2	2	1	0	1	0	0	1	3	3	2	2	2	1	5	2	3	1	1	2	3	1	1	1	2	2	3	2	3	8	1	5
1.18171	1	48	7633	2	2	4	1	4	4	1	1	3	2	2	4	3	3	3	4	1	0	1	0	0	2	4	5	4	2	1	2	3	4	3	4	3	2	3	2	3	2	2	1	3	4	4	2	3	3
1.18171	1	45	4330	2	2	3	1	3	4	1	1	3	2	2	2	2	2	2	3	1	0	1	0	0	3	2	2	3	3	2	3	5	3	2	2	4	3	3	2	2	3	3	2	3	5	2	4	5	3
1.105	2	44	660	2	1	3	2	5	5	1	1	2	5	2	4	2	3	3	3	2	0	0	1	0	4	5	5	5	5	5	6	6	5	5	6	3	6	2	1	6	2	3	2	6	3	3	3	4	4
1.105	2	40	3610	2	1	4	2	1	1	1	1	2	1	2	4	3	2	2	3	1	0	0	1	0	3	4	5	5	2	2	3	5	4	6	2	2	6	2	2	4	6	4	4	6	3	5	3	1	4
1.18171	1	47	5141	2	2	5	2	4	4	1	1	1	1	1	4	4	2	2	2	1	0	0	1	0	2	2	3	3	2	1	4	3	1	3	5	6	1	4	1	6	2	6	4	4	4	4	4	7	5
1.08976	2	37	4051	2	2	5	2	1	3	1	1	1	1	2	4	3	2	3	3	2	0	0	1	0	1	2	5	5	3	2	1	4	2	2	6	1	2	2	1	3	1	2	3	3	6	5	4	3	5
1.18171	1	46	8000	2	2	4	2	1	1	1	1	1	1	1	4	4	3	3	3	1	0	0	1	0	2	2	4	1	2	2	1	3	2	2	2	2	6	3	2	3	1	2	2	6	5	6	3	5	6
1.08976	2	45	4374	2	2	4	2	1	5	2	2	2	2	2	2	3	2	2	6	2	0	1	0	0	1	2	2	6	2	2	3	5	2	2	6	1	6	2	1	2	1	1	6	3	5	6	5	4	4
1.18171	1	40	5165	2	2	3	2	4	4	2	3	2	2	3	4	3	3	3	3	1	0	0	1	0	4	4	3	2	5	5	5	5	2	3	3	2	3	4	3	3	3	3	4	4	1	1	6	6	5
1.19483	1	41	1364	2	1	5	2	3	1	1	1	1	2	1	4	4	3	3	3	2	0	0	1	0	5	3	5	3	5	5	3	5	5	5	5	5	5	5	5	5	5	5	1	5	1	1	1	1	1
1.46638	2	67	7550	3	2	4	2	1	1	1	1	2	1	1	4	6	2	6	3	1	0	0	1	0	6	2	3	3	2	1	2	3	2	2	2	2	2	3	2	3	6	2	4	6	7	7	8	4	7
1.46638	2	61	7056	3	2	2	2	1	5	1	1	2	1	2	2	3	5	5	5	2	0	0	1	0	5	5	5	5	3	1	5	5	5	4	5	5	5	1	2	2	2	2	1	5	8	8	8	8	8
1.19483	1	40	3743	2	1	4	2	1	1	1	2	4	2	2	2	3	5	5	5	1	0	0	1	0	3	3	3	3	4	4	3	4	2	3	3	4	3	3	4	4	4	3	3	4	3	4	3	5	3
1.08976	2	38	8003	2	2	1	2	1	3	2	5	5	2	2	7	4	4	4	4	2	0	0	1	0	6	6	6	6	6	6	6	6	4	6	6	6	6	2	6	6	4	6	6	6	8	8	8	8	8
1.46638	2	57	5038	3	2	4	2	4	3	2	2	2	1	2	4	2	3	3	3	1	0	1	0	0	3	3	4	3	3	1	1	5	3	3	3	4	4	1	3	3	3	2	2	3	3	5	4	4	2
1.19483	1	36	683	2	1	5	2	1	3	2	1	3	2	5	4	4	5	6	5	1	0	1	0	0	1	2	4	6	5	6	6	5	1	6	1	1	1	2	5	3	2	2	1	4	5	4	6	3	5
1.105	2	41	3024	2	1	2	2	1	3	1	1	2	2	2	4	3	2	2	2	2	0	0	1	0	2	2	5	4	2	2	3	3	2	2	3	3	2	2	3	3	2	2	6	3	4	5	5	5	4
1.19483	1	36	1929	2	1	3	2	1	6	5	5	5	5	5	4	5	6	6	6	1	0	0	1	0	5	5	5	5	6	6	5	5	6	6	6	6	6	6	6	5	6	6	2	6	4	4	4	4	4
1.19483	1	40	560	2	1	4	2	1	1	1	1	1	1	1	4	3	6	3	4	2	0	0	0	1	6	6	6	6	6	2	2	6	6	3	3	1	3	6	1	6	1	6	6	6	6	7	6	6	7
1.18171	1	38	4077	2	2	4	2	3	1	3	1	4	2	2	2	2	5	5	5	1	0	0	1	0	5	5	5	5	5	5	5	5	5	5	5	5	5	5	5	5	5	5	5	5	3	4	3	5	3
0.983333	2	55	3962	3	1	4	2	6	5	1	1	3	1	1	3	4	4	4	4	2	0	0	1	0	5	4	5	3	3	2	3	5	5	3	5	2	5	2	3	3	3	2	3	4	3	4	1	5	4
1.19483	1	43	3300	2	1	4	2	1	2	2	1	2	1	2	3	4	2	3	4	2	0	0	1	0	2	6	5	5	4	2	5	5	3	3	2	2	4	1	4	3	2	2	1	4	1	4	1	1	2
1.08976	2	44	9310	2	2	2	2	6	5	1	1	2	1	2	3	5	5	5	5	2	0	0	1	0	6	6	6	6	6	6	6	6	5	6	6	6	6	6	6	6	6	6	6	6	8	8	8	8	8
1.19483	1	42	2849	2	1	3	2	1	1	1	1	1	1	1	4	2	5	5	5	2	0	0	1	0	6	6	3	6	3	1	1	5	4	3	6	6	5	2	4	6	3	1	1	6	2	7	2	1	1
1.105	2	38	481	2	1	5	2	2	1	1	5	5	1	1	3	2	4	4	5	2	0	0	1	0	4	4	4	4	1	1	2	5	2	2	6	1	1	5	6	3	2	2	2	3	4	5	8	4	6
1.105	2	38	1364	2	1	4	2	1	5	1	1	1	5	5	4	4	6	6	6	2	0	0	1	0	2	6	5	5	2	2	6	3	6	6	6	2	6	6	2	3	2	2	4	6	5	5	8	3	5
1.105	2	38	3227	2	1	3	1	5	1	1	1	1	1	1	4	2	5	5	4	1	1	1	0	0	1	1	1	1	1	1	2	2	2	1	1	1	2	1	1	1	1	1	4	1	6	5	5	4	6
1.19483	1	48	2280	2	1	3	2	6	1	1	1	3	1	1	2	3	4	4	4	2	0	0	0	1	5	5	5	5	3	1	2	5	3	3	6	4	5	1	5	4	4	2	5	3	4	5	2	2	2
1.19483	1	47	3540	2	1	3	2	6	5	1	1	1	1	2	4	3	1	1	1	1	0	0	1	0	3	3	3	3	3	2	3	5	3	3	3	3	3	3	3	6	2	3	4	6	3	4	8	3	7
1.08976	2	49	5097	2	2	5	2	4	4	1	1	3	1	2	4	4	4	4	4	1	0	1	0	0	3	5	5	5	5	3	3	5	4	6	2	1	2	3	5	3	3	3	1	6	4	3	5	4	7
1.105	2	46	1062	2	1	4	2	1	2	1	1	2	1	2	4	4	4	4	4	2	0	0	1	0	4	3	4	4	3	3	3	5	4	5	5	4	6	1	3	5	5	3	5	6	5	5	3	5	5
1.18171	1	46	4708	2	2	2	2	1	1	2	1	2	2	1	3	4	6	6	6	2	0	0	1	0	3	3	5	3	4	3	2	5	3	2	6	1	6	6	6	6	6	6	6	6	4	4	4	4	4
1.105	2	38	3244	2	1	5	2	1	1	1	1	1	3	2	3	2	3	3	3	1	0	0	1	0	3	3	4	3	3	3	6	5	3	3	3	6	6	6	2	3	2	3	4	3	4	4	4	2	4
1.105	2	44	1540	2	1	5	2	5	5	1	1	5	2	1	2	3	5	5	5	1	0	0	0	1	5	4	4	4	4	1	5	5	3	5	5	3	6	2	5	3	5	1	1	4	5	4	8	1	3
1.105	2	39	575	2	1	4	2	1	2	1	1	2	1	2	4	6	6	6	6	1	0	1	0	0	6	6	6	6	6	6	6	6	3	6	6	6	6	6	3	3	3	3	4	6	4	5	4	3	5
1.105	2	42	1618	2	1	2	2	5	5	2	1	5	2	2	4	4	5	5	5	2	0	0	1	0	6	6	5	6	3	3	6	5	6	6	3	6	6	1	2	3	3	2	6	6	8	8	8	8	8
0.672245	1	61	983	3	1	3	2	5	1	1	1	1	2	2	4	2	4	4	4	1	0	0	1	0	5	3	3	4	4	2	3	5	4	3	2	1	2	3	5	4	3	4	3	4	3	3	4	8	4
1.18171	1	48	6030	2	2	4	2	1	1	2	2	3	2	2	3	3	3	4	4	1	0	0	1	0	4	3	6	2	4	2	3	5	3	2	1	2	2	3	1	3	2	2	6	3	4	4	4	7	4
1.18171	1	42	5038	2	2	2	2	1	2	1	1	2	1	1	4	3	4	4	4	1	0	0	1	0	5	5	5	5	5	5	3	5	5	3	5	1	6	6	5	5	5	6	1	5	1	1	1	1	1
1.105	2	48	474	2	1	4	2	5	4	1	1	1	1	1	3	4	4	4	3	1	0	0	0	1	4	4	4	4	5	3	3	5	4	3	2	1	4	2	2	2	6	2	3	4	7	6	5	7	7
1.08976	2	39	4843	2	2	4	2	1	5	1	2	1	1	2	4	4	2	3	2	1	0	1	0	0	3	3	4	5	4	3	4	5	4	3	3	2	3	2	2	3	3	3	3	6	5	5	6	5	6
1.105	2	39	1920	2	1	2	2	1	5	1	1	2	1	1	3	4	4	4	4	2	0	0	1	0	3	3	5	3	2	2	2	4	4	3	3	3	3	3	4	5	3	1	2	3	4	3	4	3	4
1.105	2	43	1413	2	1	5	2	1	2	1	1	1	2	2	4	4	4	2	3	1	0	1	0	0	2	4	5	5	3	1	5	5	2	6	3	4	2	3	4	6	2	2	2	6	8	1	8	3	6
0.672245	1	71	1665	3	1	2	2	1	1	1	1	1	1	1	4	2	3	3	3	1	0	0	1	0	3	3	3	3	4	4	4	4	3	3	3	3	3	1	6	6	3	3	1	6	1	1	8	8	8
1.19483	1	49	2008	2	1	4	2	4	2	1	2	3	1	2	3	3	4	4	4	1	0	0	1	0	4	4	4	4	4	3	3	4	4	6	6	1	6	6	3	6	6	3	1	6	4	4	4	4	4
1.19483	1	41	1633	2	1	4	2	1	5	1	1	2	1	1	3	3	4	3	2	2	0	0	1	0	5	5	5	5	5	5	5	5	5	5	5	5	5	5	3	5	5	4	3	6	5	4	3	4	6
1.18171	1	43	7049	2	2	5	2	4	4	2	1	2	2	3	4	3	3	3	2	1	0	0	1	0	3	2	5	5	3	2	1	5	3	3	3	1	3	2	3	3	3	4	5	3	2	2	4	2	5
1.18171	1	48	4353	2	2	4	2	1	2	1	1	4	1	1	2	3	5	5	5	1	0	0	1	0	5	5	5	5	5	3	3	5	5	5	5	5	6	1	5	5	5	5	1	5	1	1	2	1	2
0.827273	1	67	4032	3	2	1	2	1	1	1	1	3	1	1	3	3	4	3	3	2	0	0	1	0	3	3	6	3	2	2	1	5	6	6	3	1	6	3	3	6	2	2	1	3	4	7	8	2	2
1.105	2	43	3660	2	1	3	2	5	5	1	1	1	1	1	4	4	3	3	3	2	0	0	1	0	3	6	6	6	3	6	6	5	5	6	6	6	6	6	6	6	6	6	6	6	4	4	4	4	4
1.19483	1	43	986	2	1	3	2	1	1	2	2	2	2	2	4	3	3	2	2	1	0	0	1	0	2	2	2	2	5	4	3	5	3	3	3	3	3	2	2	3	2	2	3	3	4	4	4	4	4
1.18171	1	46	5938	2	2	2	2	1	1	2	1	3	2	1	3	3	5	5	3	1	0	0	1	0	5	5	5	5	4	5	3	5	5	3	5	5	5	4	4	5	5	4	1	4	2	3	2	2	2
1.08976	2	43	5414	2	2	5	2	1	2	1	2	1	1	2	4	4	6	6	6	1	0	1	0	0	2	6	2	6	3	1	2	5	2	3	3	2	4	2	3	2	3	2	4	2	4	5	4	4	4
1.19483	1	43	1157	2	1	4	2	2	1	3	5	5	5	2	3	4	4	4	5	1	0	0	1	0	5	5	4	1	5	3	3	5	4	4	6	1	6	6	3	2	2	2	2	6	1	1	6	4	2
1.08976	2	47	7021	2	2	3	2	1	1	1	1	1	2	2	4	3	2	2	2	2	0	0	1	0	3	3	2	2	3	3	2	5	3	3	4	1	3	3	2	2	2	2	3	3	2	1	4	2	5
1.19483	1	40	579	2	1	4	2	1	1	1	2	1	1	2	4	4	2	2	2	2	0	0	1	0	3	3	6	6	3	4	3	5	3	2	2	2	6	2	2	6	2	3	6	6	4	4	3	4	5
1.105	2	42	3174	2	1	4	2	5	5	1	1	2	1	1	3	3	5	5	5	2	0	0	1	0	5	5	5	5	3	2	3	5	5	2	6	2	2	6	5	5	5	5	1	6	4	5	3	4	4
1.46638	2	55	8725	3	2	5	2	1	1	1	1	1	1	1	4	3	6	5	5	2	0	0	1	0	5	5	5	5	1	1	1	5	5	5	6	6	6	3	3	6	3	3	1	6	8	8	8	8	8
1.08976	2	45	9020	2	2	3	2	1	1	1	1	2	1	2	3	4	4	4	4	2	0	0	1	0	2	4	5	5	3	1	2	5	3	2	3	2	6	6	2	3	3	1	1	6	8	8	8	8	8
0.672245	1	67	3280	3	1	2	2	1	1	2	2	2	1	1	4	2	2	3	4	2	0	0	1	0	5	3	4	3	4	2	4	5	4	2	1	1	1	1	2	5	5	3	1	5	3	1	1	3	3
1.19483	1	46	1166	2	1	4	2	1	1	1	1	3	1	1	1	3	4	5	5	1	0	1	0	0	3	6	3	6	2	1	1	6	6	6	6	1	6	2	6	6	2	2	1	6	8	5	4	8	8
1.08976	2	37	5135	2	2	4	2	6	5	1	1	2	1	2	4	3	3	3	3	1	0	0	1	0	3	4	3	2	4	3	3	5	4	4	6	6	6	6	2	6	2	6	6	6	5	4	3	5	5
1.08976	2	46	6006	2	2	4	2	5	1	1	1	2	2	2	3	3	2	2	2	2	0	0	1	0	2	2	6	6	2	3	6	5	3	3	6	2	3	3	2	3	2	2	6	3	5	4	5	3	5
1.105	2	43	465	2	1	5	2	4	4	1	1	3	1	1	4	3	2	5	5	1	0	0	1	0	5	2	5	5	1	1	6	1	1	5	6	1	1	5	6	6	5	1	1	4	1	1	5	1	5
1.19483	1	47	1395	2	1	5	2	1	1	2	2	2	1	1	4	2	3	3	3	1	0	0	1	0	2	4	4	4	3	2	4	5	3	3	5	4	5	2	2	4	3	3	3	2	4	5	5	5	4
0	1	69	0	3	#NULL!	4	2	2	2	1	1	2	2	3	4	2	1	2	1	1	1	1	0	0	1	1	3	2	2	1	2	3	1	1	1	1	2	4	2	5	1	2	5	2	5	7	6	3	6
0.983333	2	60	570	3	1	3	2	1	1	2	1	2	5	2	4	5	1	2	6	2	0	1	0	0	2	6	6	3	4	3	3	5	3	1	6	2	6	6	6	4	2	2	2	6	4	4	4	4	4
0.983333	2	50	2214	3	1	2	2	1	2	3	1	2	1	3	4	4	3	3	3	2	0	0	0	1	2	4	3	5	3	2	1	5	3	2	6	6	5	1	1	2	1	1	1	2	2	7	4	4	4
1.19483	1	44	2443	2	1	2	1	5	5	1	1	1	1	1	3	3	2	3	4	2	0	0	1	0	3	2	3	2	4	2	2	5	3	2	4	3	2	4	1	2	2	2	4	2	6	6	8	5	5
1.18171	1	46	4724	2	2	4	2	1	5	2	2	2	2	2	2	2	3	3	4	2	0	0	1	0	5	2	5	4	2	2	3	5	4	2	2	2	2	4	4	6	2	3	2	4	4	3	2	3	4
1.08976	2	46	7039	2	2	3	2	1	5	1	1	5	1	1	3	6	3	3	3	2	0	0	1	0	2	6	5	5	4	3	3	5	3	6	6	6	6	2	3	6	6	3	3	6	8	8	8	8	8
0.672245	1	72	2080	3	1	5	1	1	5	1	2	2	1	1	4	3	2	3	3	2	0	0	1	0	3	3	3	3	4	3	3	4	3	2	1	2	1	1	1	2	3	1	1	2	6	6	4	6	6
1.105	2	48	1900	2	1	4	2	1	5	1	2	2	2	2	3	3	3	4	3	2	0	0	1	0	4	3	5	5	2	4	4	4	4	6	5	2	6	6	6	6	4	2	5	6	8	8	4	8	6
1.18171	1	48	6433	2	2	4	2	5	5	1	1	3	1	1	6	2	5	5	5	2	0	0	1	0	5	5	5	5	5	5	5	5	5	5	5	6	6	6	5	5	5	5	1	5	1	1	1	1	1
1.105	2	48	3924	2	1	5	2	4	4	1	2	1	1	2	4	2	2	2	2	1	0	0	1	0	2	3	3	3	3	3	3	5	2	2	3	1	2	2	2	3	3	3	4	3	4	4	5	4	3
1.19483	1	36	2160	2	1	4	2	1	1	2	1	2	2	2	4	2	2	5	3	1	0	0	1	0	5	2	2	2	3	1	3	5	3	2	3	1	4	1	4	2	2	2	1	3	3	3	5	2	6
1.105	2	36	1400	2	1	3	2	5	4	1	1	2	2	1	4	4	4	3	3	2	0	0	0	1	3	4	4	4	2	6	2	3	3	2	6	2	6	2	3	6	6	4	6	3	5	5	8	5	5
1.105	2	37	1164	2	1	5	2	2	5	2	1	5	5	2	4	3	2	2	4	1	0	0	1	0	3	4	5	4	1	2	1	5	4	6	6	2	1	3	2	6	1	1	1	6	6	3	5	8	6
1.105	2	43	571	2	1	5	2	3	2	1	1	2	1	1	4	4	2	3	4	1	0	1	0	0	6	6	3	3	5	4	3	5	3	6	3	1	6	6	3	6	6	2	2	3	8	5	5	2	5
1.18171	1	46	9013	2	2	4	2	1	3	3	2	2	2	3	3	4	3	3	3	2	0	0	0	1	6	6	3	3	6	5	6	6	3	6	5	6	3	6	3	3	2	3	3	6	8	8	8	8	8
1.08976	2	38	5265	2	2	3	2	1	1	1	1	5	5	2	3	5	5	5	5	2	0	0	1	0	3	5	5	5	5	5	5	5	5	6	6	6	6	6	6	6	6	6	1	6	8	8	8	8	8
1.105	2	44	3031	2	1	3	2	1	3	1	1	2	2	2	3	3	1	2	2	1	0	1	0	0	1	2	4	3	2	2	2	2	2	2	2	2	2	2	2	1	2	1	3	3	6	5	5	4	6
0.672245	1	72	1414	3	1	4	2	1	2	2	2	2	1	1	3	3	4	3	3	1	0	0	1	0	3	3	3	2	4	2	3	5	3	4	1	1	5	1	3	5	2	3	1	4	1	1	5	7	2
1.19	2	34	482	1	1	4	2	1	5	2	2	2	2	2	4	3	2	2	6	2	0	0	1	0	3	3	3	3	3	6	2	3	6	6	6	6	6	6	6	6	6	6	6	6	1	1	1	1	1
1.105	2	43	655	2	1	4	2	1	1	1	1	1	2	2	3	4	6	3	2	1	0	1	0	0	2	2	6	3	2	3	3	6	1	1	2	2	1	2	1	1	1	1	1	4	8	8	8	8	8
0.672245	1	67	1679	3	1	4	2	5	1	2	1	1	2	3	4	2	6	6	6	1	0	0	1	0	3	6	6	6	2	6	6	6	4	6	6	6	6	6	6	6	6	6	6	6	4	3	8	6	6
1.19483	1	48	1475	2	1	4	2	4	4	1	1	3	1	1	2	1	5	5	5	2	0	0	1	0	5	5	5	5	1	1	1	1	5	5	5	5	5	5	5	5	5	5	1	5	4	1	1	4	5
1.08976	2	43	6900	2	2	4	2	3	2	1	1	3	3	2	3	5	6	6	5	2	0	0	1	0	6	6	5	5	2	2	3	5	6	6	6	6	6	6	6	5	3	2	1	6	4	4	4	4	4
1.105	2	42	1367	2	1	5	2	2	1	1	1	3	1	1	4	2	3	3	3	1	0	1	0	0	3	3	3	3	2	2	2	5	3	3	4	1	6	1	2	6	2	2	1	6	4	5	4	2	6
0.827273	1	66	4580	3	2	2	2	6	5	1	1	3	1	2	4	3	5	3	4	2	0	0	1	0	4	4	5	5	3	3	3	5	5	4	1	1	3	2	3	4	3	3	1	4	3	3	8	2	5
1.09369	1	23	5075	1	2	4	2	1	5	1	1	3	2	1	4	2	5	5	5	1	0	0	1	0	5	3	2	2	4	3	3	4	2	4	3	2	2	3	2	2	2	2	1	3	5	5	4	5	5
1.46638	2	66	5003	3	2	4	2	2	2	1	1	2	1	2	5	4	3	3	3	1	0	0	1	0	4	3	4	2	5	4	2	5	2	2	2	3	1	1	2	4	2	3	1	6	5	5	5	6	6
1.18171	1	47	7091	2	2	4	2	1	2	1	1	2	1	1	4	4	3	4	4	1	0	1	0	0	2	2	2	3	3	3	4	4	2	2	3	1	6	2	1	3	2	2	2	3	4	4	3	4	5
1.19483	1	37	464	2	1	5	2	1	5	2	2	2	2	5	5	3	2	2	3	1	0	1	0	0	3	2	2	2	5	2	2	5	2	2	1	2	3	1	2	3	3	3	2	6	4	4	3	2	5
0.827273	1	51	6425	3	2	2	2	5	1	2	2	3	2	2	2	3	5	5	5	1	0	1	0	0	5	5	5	2	5	5	5	5	3	6	6	6	6	1	5	5	5	5	1	6	8	8	4	4	4
1.18171	1	41	9008	2	2	4	2	4	3	1	1	3	2	1	4	4	5	5	5	2	0	0	1	0	3	4	5	5	5	3	3	5	4	3	6	6	6	2	6	6	6	3	1	6	4	4	4	3	4
1.08976	2	47	4623	2	2	1	2	1	1	1	1	5	1	1	3	5	3	3	3	2	0	0	1	0	6	6	5	6	2	1	2	4	6	6	6	6	6	6	6	5	6	1	2	6	4	4	4	4	4
0.672245	1	54	986	3	1	3	2	6	1	1	2	2	2	2	4	5	2	2	2	2	0	0	0	1	3	3	3	5	3	3	3	4	3	3	3	3	3	3	3	3	2	2	3	3	2	2	3	2	3
0.983333	2	63	1555	3	1	1	2	1	5	1	1	1	1	1	3	4	6	5	5	2	0	0	1	0	3	5	5	5	3	3	3	4	5	2	1	1	3	6	3	3	3	1	1	6	8	8	8	8	8
1.18171	1	48	6005	2	2	2	2	1	1	1	1	1	1	1	2	3	4	4	4	1	0	0	1	0	4	4	4	4	3	4	4	5	4	4	4	1	5	1	2	4	2	1	1	2	2	2	2	2	1
1.18171	1	43	4836	2	2	2	2	1	5	1	1	2	1	2	3	6	3	3	3	1	0	1	0	0	3	3	3	3	3	4	4	4	3	3	3	6	6	2	6	6	3	3	2	6	5	6	5	5	5
1.105	2	36	2750	2	1	5	2	2	5	2	1	1	1	1	4	2	2	3	3	1	0	0	1	0	2	4	3	2	3	1	2	5	3	2	2	3	4	2	2	2	2	2	4	3	6	6	4	3	5
1.12826	2	27	4083	1	2	1	2	1	1	1	1	1	5	4	4	4	3	4	5	1	0	1	0	0	6	6	6	6	4	3	6	3	6	6	6	6	6	6	1	6	6	1	1	6	4	4	4	2	4
1.19483	1	47	3560	2	1	5	2	3	5	3	3	4	2	2	4	3	4	4	4	1	0	0	1	0	3	5	2	2	4	3	3	5	2	3	1	1	1	3	2	3	2	5	5	4	2	2	4	5	4
0.672245	1	60	1086	3	1	2	2	5	1	3	4	1	2	4	3	2	3	3	3	1	0	0	1	0	5	3	5	4	5	3	5	5	5	4	3	3	5	1	2	1	1	3	5	5	1	1	8	4	7
0.983333	2	59	1251	3	1	3	2	1	4	1	1	1	1	1	3	2	1	1	1	2	0	0	1	0	2	3	2	3	2	2	2	2	3	3	2	2	2	3	2	3	1	1	3	2	6	6	5	4	4
1.09369	1	27	5563	1	2	5	2	1	1	2	2	3	1	2	4	2	5	5	5	1	0	1	0	0	5	5	4	4	2	1	4	5	3	5	6	5	5	1	5	5	5	2	1	6	1	1	5	2	5
1.19483	1	44	3040	2	1	4	2	2	1	2	1	1	1	1	4	3	3	5	5	1	0	1	0	0	2	3	3	3	4	3	2	5	4	3	1	1	2	2	2	2	2	1	1	3	5	4	6	5	5
1.08976	2	42	5116	2	2	5	2	2	1	2	2	2	3	1	4	3	3	3	4	2	0	0	1	0	3	2	4	3	3	1	3	4	2	3	2	4	2	1	2	6	2	2	2	3	4	4	5	4	5
1.18171	1	41	4007	2	2	5	2	4	4	2	1	3	2	2	3	4	2	3	3	1	0	0	0	1	2	4	2	2	5	2	3	4	2	2	2	2	3	3	2	2	2	3	3	6	4	4	5	5	5
1.105	2	40	660	2	1	3	2	1	1	1	1	2	1	1	2	3	3	3	4	2	0	0	1	0	5	5	5	5	3	3	4	5	5	5	3	2	5	2	5	2	3	2	1	4	2	3	2	3	2
0.983333	2	62	3269	3	1	3	2	2	5	1	1	3	3	2	3	5	5	5	5	2	0	0	1	0	5	5	5	5	5	4	5	4	6	5	5	5	6	3	5	5	5	5	5	3	8	2	8	2	8
1.105	2	37	3142	2	1	5	2	1	1	1	1	1	1	1	4	3	2	2	2	1	0	0	1	0	2	6	4	6	3	2	3	4	6	2	1	1	6	3	2	4	2	4	4	2	7	7	8	4	3
0	2	61	#NULL!	3	#NULL!	4	2	2	3	1	1	2	2	1	3	3	2	2	3	1	0	0	1	0	3	2	2	2	2	2	2	4	2	1	2	1	2	2	5	4	3	4	4	3	5	5	5	4	5
1.19483	1	46	673	2	1	5	2	1	1	1	1	3	2	2	4	3	4	4	5	1	0	0	1	0	4	4	6	5	5	3	3	5	5	2	3	2	1	2	5	5	4	2	1	4	5	4	4	7	6
1.08976	2	47	9845	2	2	1	2	2	1	1	1	1	1	1	5	5	5	5	5	2	0	0	1	0	5	5	5	5	5	5	1	5	5	6	6	6	5	6	1	6	6	1	1	6	8	8	8	8	8
0.983333	2	61	3514	3	1	4	1	1	1	1	1	1	1	1	4	4	3	2	2	2	0	0	1	0	3	3	3	3	5	5	5	5	5	2	6	1	1	1	1	1	2	3	1	2	7	7	8	4	7
0.983333	2	52	1605	3	1	1	2	5	5	1	1	2	1	2	5	4	3	2	4	2	0	0	1	0	2	3	5	5	3	3	3	5	5	4	6	2	2	3	2	6	2	3	6	6	6	4	3	6	6
1.19483	1	44	380	2	1	4	2	4	3	2	2	2	2	2	3	3	3	3	3	1	0	0	1	0	6	6	6	6	5	5	4	5	4	6	3	2	6	6	3	6	6	6	2	6	5	5	5	5	6
1.19483	1	38	774	2	1	4	2	2	2	2	1	2	2	1	4	3	3	3	3	1	0	1	0	0	4	3	2	2	1	3	2	5	2	3	2	2	1	3	2	2	4	3	4	3	4	4	6	5	5
0.672245	1	57	473	3	1	5	2	4	4	1	1	3	1	2	4	4	4	3	4	2	0	0	1	0	4	4	4	4	5	4	4	5	4	3	4	2	2	3	3	2	3	2	2	6	8	8	8	8	8
1.08976	2	43	8613	2	2	3	2	1	1	1	1	1	2	2	4	4	3	3	2	1	0	1	0	0	3	3	4	2	3	2	6	5	2	6	6	6	6	6	1	6	6	4	5	6	8	6	5	7	5
1.18171	1	43	9520	2	2	3	2	1	2	1	1	2	5	1	3	5	5	5	5	2	0	0	1	0	5	5	5	5	5	3	3	5	5	6	6	6	1	6	5	5	5	1	1	6	8	8	1	8	1
0.983333	2	56	2165	3	1	3	2	2	1	1	1	1	1	1	4	3	3	3	3	2	0	0	1	0	3	3	3	3	2	2	2	3	4	3	3	3	3	3	4	4	4	4	4	2	6	6	8	5	6
1.19483	1	46	583	2	1	4	2	2	5	1	1	3	2	2	4	2	4	3	2	1	0	0	1	0	3	3	2	2	3	2	2	5	2	2	2	1	1	6	2	6	2	2	2	3	4	1	3	3	5
0.672245	1	59	263	3	1	5	2	1	2	1	2	2	1	2	4	3	3	3	3	1	0	0	1	0	3	3	5	5	3	3	3	4	3	3	3	1	2	3	3	3	3	2	1	4	3	3	3	2	4
1.105	2	45	3045	2	1	4	2	1	5	1	1	3	1	1	4	3	3	2	3	1	0	0	1	0	4	3	3	3	2	2	4	5	4	3	3	2	3	3	2	3	3	2	1	4	4	5	4	4	4
1.46638	2	53	7350	3	2	3	2	1	1	1	1	5	1	1	3	4	6	6	6	2	0	0	1	0	5	5	5	5	3	2	3	5	5	3	6	1	6	2	2	5	6	2	1	6	8	8	8	8	8
1.46638	2	60	7020	3	2	4	2	1	5	1	1	2	1	1	3	3	2	3	3	2	0	0	1	0	3	3	4	2	2	2	2	4	2	1	2	1	2	4	1	1	1	1	2	2	6	5	5	4	6
1.08976	2	44	8003	2	2	4	2	2	1	2	2	2	2	2	4	4	3	3	3	1	0	0	0	1	3	3	3	3	3	3	3	4	3	3	3	3	3	3	3	3	3	3	3	3	8	8	8	5	5
1.08976	2	46	7020	2	2	5	2	1	5	1	1	1	1	1	5	2	2	2	2	1	0	0	1	0	2	2	5	4	3	3	4	5	2	3	5	2	2	4	2	2	2	4	1	3	4	5	3	4	4
1.08976	2	45	9027	2	2	5	2	1	4	2	5	5	5	2	4	4	6	6	6	2	0	0	1	0	6	6	6	3	6	6	4	6	6	6	6	3	6	6	6	6	6	3	6	6	8	8	8	8	8
1.19483	1	45	1711	2	1	3	2	1	5	1	1	2	2	2	3	4	5	5	5	2	0	0	1	0	5	5	5	5	5	5	5	5	5	3	6	2	1	3	5	5	6	5	1	6	8	5	8	7	6
0.672245	1	72	1166	3	1	5	2	2	1	1	1	4	1	1	2	3	5	5	5	2	0	0	1	0	5	5	5	5	5	5	5	5	5	5	5	5	6	6	5	5	5	5	1	5	1	1	1	1	1
0.672245	1	53	3209	3	1	4	2	1	1	1	2	2	1	2	4	2	4	5	5	1	0	1	0	0	3	3	2	2	3	1	2	5	3	4	2	2	2	4	1	2	2	1	3	4	5	5	5	4	6
1.08976	2	48	6091	2	2	2	2	1	1	1	1	1	1	1	3	2	3	3	3	2	0	0	1	0	4	2	4	3	4	1	1	5	3	3	3	3	3	3	1	5	3	1	2	2	7	7	4	4	4
1.105	2	38	1364	2	1	5	2	2	3	1	1	2	1	1	4	3	2	2	3	1	0	0	1	0	2	1	3	1	1	3	2	4	2	1	2	2	1	4	2	2	3	2	3	2	5	4	5	5	5
1.08976	2	38	4332	2	2	4	2	1	1	1	2	3	2	2	2	6	4	5	5	2	0	0	1	0	3	4	5	5	3	3	4	4	4	4	5	2	4	3	3	4	3	2	1	4	3	3	4	5	5
0.672245	1	67	1182	3	1	4	2	2	3	1	1	1	1	3	3	2	1	4	3	2	0	1	0	0	2	2	4	2	1	2	4	5	1	1	2	2	3	2	1	3	3	2	4	2	5	5	5	2	6
0.672245	1	72	1530	3	1	5	2	1	2	1	1	1	1	1	3	2	2	2	3	2	0	0	1	0	5	5	5	4	3	3	4	6	4	4	6	6	6	6	2	6	6	3	1	3	4	5	3	5	4
1.105	2	40	750	2	1	3	2	2	2	2	2	2	2	2	3	3	3	3	3	2	0	0	1	0	6	6	6	6	6	6	6	6	6	6	6	6	6	6	6	6	6	6	6	6	8	8	8	8	8
1.18171	1	47	4876	2	2	4	2	1	1	1	1	2	1	1	3	2	6	6	6	1	0	0	1	0	6	6	6	6	6	6	6	6	6	6	6	6	6	6	6	6	6	1	6	6	8	8	8	8	8
0.827273	1	68	9300	3	2	2	2	2	1	1	1	3	1	1	3	3	3	3	4	2	0	0	1	0	4	3	4	3	3	3	3	4	3	3	2	2	2	4	1	3	2	2	2	3	6	7	4	6	6
1.46638	2	58	4053	3	2	2	2	1	3	1	1	1	1	1	3	2	2	2	2	1	0	0	0	1	6	6	6	6	1	1	2	2	3	2	1	1	6	1	1	2	2	1	2	3	6	6	6	8	6
1.08976	2	38	4842	2	2	5	2	1	1	2	2	2	5	2	2	3	3	3	3	1	0	0	1	0	3	3	3	3	5	5	5	5	5	5	5	4	6	6	6	6	6	6	2	5	1	1	1	1	1
1.105	2	45	3121	2	1	4	2	1	1	2	1	1	1	2	4	3	2	2	2	2	0	0	0	1	2	3	4	4	3	2	2	5	2	1	4	2	6	6	2	4	6	2	4	6	4	4	4	3	5
1.18171	1	40	5522	2	2	4	2	4	1	1	1	2	1	1	5	2	5	5	5	1	0	0	1	0	5	5	5	5	5	5	3	5	3	6	6	6	6	6	6	6	6	6	1	6	8	8	8	8	8
1.105	2	39	2316	2	1	5	2	2	5	1	1	3	1	1	4	4	5	5	5	2	0	0	1	0	5	5	5	5	1	1	1	5	5	6	6	6	6	6	6	5	5	5	1	6	8	8	8	8	8
0.672245	1	67	1384	3	1	5	2	5	5	1	1	1	1	1	4	3	3	2	2	2	0	0	1	0	3	3	3	4	4	2	3	5	4	3	3	2	2	4	2	3	3	2	2	3	6	6	4	6	7
0.672245	1	69	366	3	1	4	2	4	5	1	1	4	2	1	2	1	5	5	5	2	0	0	1	0	5	5	5	5	5	4	5	5	5	5	5	5	5	6	5	5	5	5	1	5	1	1	1	1	1
0.827273	1	58	7059	3	2	2	2	3	3	1	1	3	2	1	3	3	2	2	2	2	0	0	0	1	2	2	2	2	2	2	2	2	3	3	3	3	3	3	3	3	3	3	3	3	4	4	4	4	4
0.672245	1	52	1412	3	1	2	2	1	1	1	1	2	1	2	4	3	1	1	1	1	0	0	1	0	3	5	3	1	5	3	3	5	2	3	2	4	2	4	1	5	1	4	4	3	3	4	4	3	6
1.19	2	33	650	1	1	5	2	1	1	1	1	1	3	2	4	2	2	3	4	1	0	1	0	0	2	1	2	3	4	3	2	5	2	2	3	2	3	3	3	4	2	2	2	6	4	4	5	4	6
0.672245	1	62	3942	3	1	3	2	6	1	5	5	5	5	5	2	2	6	6	6	2	0	0	0	1	6	6	6	6	6	6	6	6	6	6	6	6	6	6	6	6	6	6	6	6	4	4	4	4	4
1.08976	2	40	6871	2	2	3	2	5	5	1	1	1	1	1	4	3	2	2	2	2	0	0	1	0	2	5	5	5	4	3	2	5	6	6	6	6	6	6	3	6	3	5	6	6	3	4	3	2	3
0.827273	1	53	5627	3	2	2	1	1	1	1	1	3	1	1	4	2	2	1	1	2	0	0	0	1	3	1	3	2	1	4	3	5	4	5	4	1	1	2	1	3	1	5	1	5	5	5	4	1	5
0.827273	1	71	7014	3	2	5	2	2	3	2	5	3	2	5	4	3	3	3	3	1	0	1	0	0	3	3	4	3	2	3	2	6	4	2	3	1	6	6	1	6	6	2	3	6	3	3	8	3	6
1.46638	2	70	4083	3	2	2	2	5	5	1	1	2	1	1	2	4	4	4	5	2	0	0	1	0	5	5	4	5	3	5	3	5	5	5	1	5	1	2	5	5	5	2	1	5	5	6	2	5	1
0.672245	1	52	1405	3	1	4	2	1	2	1	1	2	1	1	4	3	2	3	3	1	0	1	0	0	2	2	2	2	3	2	3	4	2	2	3	2	2	3	2	1	2	3	3	2	4	5	5	6	6
0.827273	1	68	5538	3	2	4	2	2	2	1	2	2	2	1	3	3	5	5	5	2	0	0	0	1	5	5	5	5	4	4	4	5	5	5	5	6	6	6	2	4	4	3	1	4	4	5	2	5	4
1.19483	1	40	3125	2	1	5	2	1	1	2	1	2	1	2	3	4	2	2	3	1	0	1	0	0	3	2	2	1	4	3	1	3	1	1	3	2	6	3	1	2	2	2	3	6	6	7	5	6	7
0.672245	1	60	1473	3	1	4	2	2	2	2	1	2	2	2	4	4	3	4	5	2	0	0	1	0	4	3	5	3	3	3	3	5	4	2	1	1	3	1	3	4	3	2	1	4	4	4	3	3	4
0.827273	1	68	4009	3	2	4	2	4	4	1	1	1	1	1	3	3	2	2	3	1	0	0	1	0	3	3	3	3	3	3	3	6	3	2	3	3	3	3	3	3	2	3	4	3	6	6	8	6	6
0.672245	1	72	2312	3	1	1	2	3	2	1	1	4	1	1	3	4	4	5	5	1	0	0	1	0	2	6	4	4	4	1	1	5	3	6	6	6	5	1	6	6	3	2	2	6	4	3	2	3	4
1.105	2	45	2380	2	1	1	2	5	5	1	1	4	1	1	6	1	5	5	5	2	0	0	1	0	5	5	5	5	5	1	1	5	5	5	1	5	5	1	1	5	5	5	1	1	1	5	1	1	1
1.105	2	37	3229	2	1	1	2	1	1	2	1	2	2	2	4	4	2	3	3	1	0	1	0	0	1	2	3	3	2	1	2	3	2	3	3	4	6	6	6	6	6	3	6	3	5	5	6	5	6
0.983333	2	72	2055	3	1	3	1	2	2	1	1	2	1	1	2	6	2	3	3	2	0	0	0	1	3	2	3	2	3	3	3	5	3	1	2	2	6	6	2	6	2	3	6	2	5	6	8	2	5
1.08976	2	47	8614	2	2	2	2	5	1	1	1	1	1	2	3	3	2	2	3	2	0	0	1	0	2	3	6	6	1	3	3	3	2	1	1	1	1	2	1	3	1	2	6	2	6	6	6	6	6
1.08976	2	40	4318	2	2	4	2	5	5	1	1	1	1	1	2	3	2	1	3	1	0	0	1	0	5	4	5	5	2	2	2	2	5	5	5	5	5	5	5	5	5	5	5	6	3	5	1	3	3
0.672245	1	50	566	3	1	5	2	4	4	2	2	2	2	2	4	4	2	3	4	1	0	1	0	0	3	4	5	3	4	5	3	5	3	4	3	1	2	3	4	4	3	3	2	5	3	4	3	1	5
0.983333	2	59	472	3	1	4	2	3	1	2	2	3	1	2	3	4	3	3	2	1	0	0	1	0	2	4	4	4	4	2	4	5	2	6	2	2	3	2	2	3	3	3	4	6	4	7	5	5	3
1.46638	2	65	5011	3	2	4	2	4	1	2	1	3	1	1	3	4	3	4	4	1	0	1	0	0	2	3	4	4	2	3	5	5	3	2	6	6	6	6	3	6	3	2	6	6	8	5	5	3	4
0.827273	1	60	5153	3	2	2	2	2	2	1	1	2	3	2	3	4	4	4	4	2	0	0	1	0	5	5	5	5	5	4	5	5	5	3	5	2	2	3	5	5	5	5	1	3	4	4	4	3	5
1.08976	2	37	6020	2	2	4	2	6	5	1	1	1	1	1	4	4	4	4	4	1	0	0	1	0	4	3	5	3	4	3	1	5	4	6	3	2	2	6	3	3	6	2	1	6	8	8	8	8	8
1.18171	1	39	6015	2	2	3	2	1	1	1	2	2	2	5	4	4	6	6	6	1	0	1	0	0	3	2	3	6	6	6	2	3	3	3	3	6	2	4	2	6	2	6	6	6	4	4	5	4	5
1.105	2	36	550	2	1	5	2	6	2	1	1	1	1	1	4	4	1	1	1	1	0	1	0	0	1	1	6	6	1	1	6	6	1	1	1	1	1	6	1	6	3	1	5	1	3	4	4	5	4
1.46638	2	51	5229	3	2	3	2	2	1	1	1	2	1	1	3	3	1	2	4	1	0	1	0	0	1	2	4	2	5	1	1	5	1	1	1	2	2	1	1	3	1	1	1	3	7	7	5	7	7
1.08976	2	37	8011	2	2	1	2	5	2	1	1	1	2	2	5	4	6	2	2	2	0	0	1	0	6	6	6	6	6	6	6	6	5	6	6	6	6	6	3	6	3	6	1	6	8	8	8	8	8
0.672245	1	67	3188	3	1	3	2	1	3	2	1	2	2	2	4	2	5	5	5	1	0	1	0	0	2	5	5	3	4	2	3	5	6	3	3	1	1	5	2	2	6	3	1	5	1	1	3	3	8
1.19483	1	45	3170	2	1	5	2	1	1	1	1	3	1	1	2	2	4	4	5	2	0	0	1	0	5	6	4	4	4	5	5	5	5	5	6	4	6	1	4	5	5	1	1	6	6	6	1	6	3
1.08976	2	41	5032	2	2	5	2	3	3	1	2	2	1	1	4	3	2	2	2	1	0	1	0	0	2	2	2	1	2	1	1	5	1	1	4	4	3	2	3	3	3	5	5	6	5	5	5	5	5
0.827273	1	64	7070	3	2	2	1	3	2	1	1	1	1	1	4	2	5	5	5	2	0	0	1	0	5	5	5	5	2	3	3	5	5	5	5	5	5	1	5	6	5	6	5	5	8	8	8	8	8
0.983333	2	51	2685	3	1	2	2	1	5	3	1	4	1	1	4	2	2	2	2	2	0	0	1	0	5	5	5	5	1	2	2	5	5	4	5	2	5	1	2	5	3	1	1	4	1	3	2	1	1
0.983333	2	53	3170	3	1	4	2	1	1	1	1	1	1	1	3	4	3	3	3	2	0	0	1	0	3	3	3	3	2	1	2	4	5	3	3	2	4	2	2	2	2	2	2	3	4	3	4	2	3
0.672245	1	66	1450	3	1	4	2	6	2	1	1	2	1	1	5	3	2	2	2	1	0	1	0	0	2	3	3	2	3	3	3	6	2	2	2	2	2	2	2	3	3	2	4	6	6	6	4	6	5
1.19483	1	46	3181	2	1	3	2	5	4	2	2	5	2	2	2	4	5	5	5	2	0	0	1	0	5	5	5	5	6	6	6	6	5	5	6	3	2	4	5	5	5	6	1	6	2	1	2	4	3
1.19483	1	47	952	2	1	1	2	2	1	1	1	1	1	1	4	1	5	5	5	1	0	1	0	0	5	5	5	5	5	5	5	5	5	5	5	5	5	1	5	5	5	1	1	1	8	1	1	1	8
1.18171	1	48	7074	2	2	4	2	1	5	1	1	5	2	1	7	3	4	4	4	2	0	0	1	0	5	5	5	5	3	3	6	6	5	6	6	6	6	2	5	5	6	2	1	6	5	4	4	5	5
0.672245	1	72	973	3	1	2	1	1	1	1	1	2	1	1	4	2	2	2	2	1	0	0	1	0	2	2	2	2	3	3	3	3	2	3	2	1	1	3	1	2	2	3	4	3	7	7	8	4	6
1.46638	2	65	6455	3	2	4	2	1	5	1	1	2	1	1	3	3	2	3	3	1	0	0	1	0	2	4	5	2	2	1	3	5	3	2	2	1	4	2	1	4	2	3	4	3	3	4	4	2	4
0.672245	1	74	670	3	1	2	2	1	1	2	2	2	2	2	3	3	3	3	3	2	0	0	1	0	4	3	3	3	4	3	3	5	5	6	6	6	6	6	6	6	6	6	1	4	8	8	8	8	8
0.983333	2	57	2340	3	1	2	2	5	4	1	1	2	1	1	4	4	6	6	6	2	0	0	1	0	6	6	5	4	3	3	3	5	6	3	6	1	1	2	3	2	2	2	1	6	6	6	2	7	7
1.08976	2	39	7018	2	2	4	2	1	1	1	1	1	1	1	5	4	6	6	6	1	0	1	0	0	5	5	1	1	4	1	2	5	1	1	1	3	3	2	1	1	2	1	1	6	1	1	1	1	1
1.19483	1	40	364	2	1	3	2	2	1	1	1	1	2	2	4	4	4	5	5	1	0	0	1	0	5	5	3	4	4	4	3	5	4	3	4	5	3	2	5	5	5	3	1	4	5	4	6	5	5
1.08976	2	48	7082	2	2	2	2	1	1	2	2	5	2	2	3	4	4	4	4	2	0	0	1	0	6	4	4	6	4	3	3	4	6	3	6	6	6	2	3	3	6	2	2	6	3	4	3	3	5
1.06893	1	31	2619	1	1	2	2	2	5	3	1	3	3	3	3	2	5	5	5	1	0	0	1	0	5	4	3	2	5	5	5	5	3	3	1	1	3	3	2	2	2	6	2	4	2	1	6	6	3
1.18171	1	41	4017	2	2	5	2	1	5	5	5	5	5	5	4	4	5	5	5	2	0	0	1	0	5	6	6	6	6	6	6	6	6	6	6	6	6	6	6	6	6	6	6	6	8	8	8	8	8
0.827273	1	72	4707	3	2	1	2	1	1	1	1	2	1	1	3	3	3	4	5	2	0	0	0	1	5	5	5	5	4	5	5	5	5	5	5	5	5	6	5	5	5	6	1	6	8	8	8	8	8
1.19483	1	45	2836	2	1	2	2	5	1	4	1	4	2	1	7	4	5	5	5	2	0	0	1	0	5	5	5	4	4	3	3	5	5	6	5	1	1	1	5	6	3	1	1	6	4	4	2	5	3
0.827273	1	66	4021	3	2	4	2	4	1	1	1	2	1	2	4	3	6	6	6	1	0	1	0	0	4	6	2	2	5	1	1	5	6	2	1	1	2	3	2	2	3	2	4	4	6	6	5	6	7
1.18171	1	43	9520	2	2	5	2	4	4	4	4	4	4	4	7	5	5	5	5	2	0	0	1	0	5	5	5	5	5	5	5	5	5	5	5	5	5	5	5	5	5	5	5	5	1	1	1	1	1
1.08976	2	41	8450	2	2	5	2	1	1	1	2	2	2	2	3	3	3	3	3	2	0	0	1	0	3	3	3	3	3	3	3	4	3	3	3	3	3	3	3	3	3	3	3	3	8	8	8	8	8
0.983333	2	60	3070	3	1	2	2	2	3	1	1	5	1	1	3	4	3	3	3	2	0	0	1	0	6	6	5	6	4	4	3	5	6	6	6	2	1	4	2	6	6	2	2	6	5	4	8	6	6
0.827273	1	74	4319	3	2	3	2	3	4	1	1	3	1	1	2	3	4	4	4	2	0	0	1	0	4	4	5	3	6	3	3	6	5	5	6	3	3	2	4	5	3	3	1	6	3	4	1	1	3
1.08976	2	43	4621	2	2	2	2	5	5	1	1	2	2	2	4	4	5	5	5	2	0	0	1	0	6	6	6	6	6	6	6	6	6	6	6	6	6	6	6	6	6	6	6	6	5	5	5	4	4
0.983333	2	61	1364	3	1	5	2	1	5	1	1	2	1	1	4	2	4	2	4	2	0	0	1	0	4	4	4	4	5	5	5	5	4	4	4	4	4	4	4	4	4	4	4	4	3	3	3	3	3
0.672245	1	69	3026	3	1	5	2	3	4	2	2	1	2	2	4	3	2	2	3	1	0	1	0	0	2	2	3	2	4	2	3	4	2	2	3	4	2	2	4	4	2	2	4	3	3	3	5	2	6
0.827273	1	62	6005	3	2	4	2	4	4	1	1	5	1	1	3	6	3	3	5	1	0	1	0	0	6	5	4	4	2	4	3	5	3	6	6	2	6	6	3	6	6	3	1	5	3	3	4	1	4
1.08976	2	47	4083	2	2	2	2	2	2	1	1	1	1	1	4	3	5	5	5	2	0	0	1	0	4	3	3	3	3	3	3	5	5	6	5	6	6	6	5	5	5	6	1	6	8	8	8	8	8
0.672245	1	52	1266	3	1	4	2	1	5	1	1	2	2	2	4	4	3	3	3	1	0	0	1	0	3	3	3	2	4	3	2	4	2	2	1	1	2	3	1	2	3	3	3	6	6	5	5	5	6
0.672245	1	56	3179	3	1	2	2	5	5	1	1	1	3	1	4	4	3	3	3	2	0	0	1	0	3	3	5	5	2	3	4	4	3	4	2	3	2	3	3	3	3	3	1	3	4	4	4	4	4
1.105	2	40	1389	2	1	4	2	1	1	2	2	2	2	2	4	3	4	2	2	2	0	0	1	0	4	4	4	4	3	3	3	3	4	4	4	4	4	4	5	4	4	2	2	6	4	4	4	4	4
1.105	2	36	2069	2	1	4	2	1	1	2	1	2	2	2	4	3	3	3	4	1	0	1	0	0	2	2	4	4	3	3	2	5	3	4	4	1	2	6	2	6	3	2	2	3	4	4	5	6	5
1.08976	2	45	7790	2	2	4	2	1	5	1	1	1	1	1	3	4	3	2	2	2	0	0	1	0	2	4	5	4	2	3	2	3	3	3	3	4	3	4	4	6	3	2	4	3	4	4	5	4	4
1.18171	1	47	5018	2	2	4	2	3	3	2	1	2	2	2	4	3	6	4	4	1	0	0	1	0	4	4	4	3	4	3	3	4	4	4	2	2	6	6	6	6	6	6	2	6	3	4	2	1	5
0.983333	2	52	2016	3	1	4	2	4	1	1	1	2	2	2	3	4	5	5	5	2	0	0	1	0	5	5	5	5	3	3	3	5	5	4	2	1	3	3	2	4	3	2	1	3	5	5	5	5	5
0.827273	1	66	7027	3	2	1	2	1	1	1	1	2	1	2	4	4	2	2	2	1	0	0	1	0	4	2	2	2	3	2	3	4	3	3	2	1	1	1	1	1	2	1	2	3	2	2	4	2	6
1.08976	2	38	5099	2	2	2	2	4	4	1	1	3	1	2	4	3	2	3	3	2	0	0	1	0	3	3	3	4	2	2	2	3	6	6	6	3	6	2	3	6	2	2	3	2	5	6	8	5	6
1.105	2	35	3110	2	1	3	2	1	2	1	1	2	2	2	3	2	3	3	3	2	0	0	1	0	2	2	2	2	2	2	2	3	2	3	3	2	3	4	3	3	3	2	2	2	4	4	4	5	6
1.19	2	25	551	1	1	4	2	2	3	2	2	2	2	2	7	6	6	6	6	2	0	0	0	1	6	6	6	6	6	6	6	6	6	6	6	6	6	6	6	6	6	6	6	3	4	4	4	4	4
1.09369	1	34	5936	1	2	2	1	3	2	1	1	2	1	2	3	2	3	3	3	2	0	0	1	0	5	4	4	5	3	2	3	4	4	3	3	3	3	3	3	4	3	3	2	4	5	6	5	5	5
1.06893	1	32	978	1	1	4	2	1	1	1	2	1	1	2	4	4	4	5	5	2	0	0	1	0	5	5	5	5	5	5	5	5	5	3	5	3	5	1	3	5	1	2	1	2	5	6	4	5	4
1.12826	2	28	4012	1	2	5	2	2	3	1	2	5	1	2	3	4	2	2	3	1	0	0	1	0	3	3	2	2	3	2	3	5	2	2	1	2	2	1	2	2	1	2	2	6	5	3	4	7	5
1.19483	1	48	565	2	1	5	2	2	1	2	5	5	2	2	5	4	5	5	5	1	0	0	1	0	4	4	1	1	4	2	1	4	4	5	5	6	6	4	5	5	5	4	1	5	5	7	5	5	5
1.19	2	28	353	1	1	5	2	1	2	1	1	2	2	2	4	4	2	2	3	1	0	1	0	0	2	3	5	5	5	3	2	4	3	2	4	4	3	3	2	4	6	3	4	2	8	5	8	3	4
1.105	2	35	1397	2	1	5	2	3	3	2	1	2	5	2	4	4	4	3	3	2	0	1	0	0	2	2	4	4	3	3	3	4	3	3	3	2	3	6	2	6	2	3	4	6	3	4	4	3	5
1.12826	2	26	5075	1	2	5	2	1	1	1	1	2	1	1	4	4	4	4	4	1	0	0	1	0	3	3	4	4	3	3	3	4	2	2	2	6	2	6	2	6	2	2	6	6	8	8	8	8	8
1.12826	2	34	4325	1	2	4	2	1	5	1	1	2	1	1	3	4	6	3	3	2	0	0	1	0	3	3	3	3	4	3	6	5	3	4	6	6	6	6	3	2	3	2	2	3	8	8	8	8	8
1.12826	2	29	6819	1	2	4	1	1	5	1	1	3	1	2	4	3	2	3	4	2	0	1	0	0	2	4	5	5	5	3	3	5	2	2	6	6	4	2	2	4	2	2	2	5	5	5	3	3	3
1.08976	2	37	5057	2	2	4	2	1	3	1	2	2	5	2	4	3	2	3	2	1	0	0	1	0	3	3	2	3	3	2	3	4	2	2	1	1	2	6	1	3	1	4	3	3	5	6	5	6	6
1.105	2	35	3430	2	1	4	2	1	5	1	1	1	1	1	3	3	2	6	6	2	0	0	1	0	6	6	6	6	3	2	3	5	3	2	2	3	2	2	3	3	2	2	6	2	5	6	3	5	5
1.06893	1	33	1336	1	1	2	2	1	1	2	3	2	3	2	4	4	4	4	4	2	0	0	0	1	4	4	4	4	4	4	5	5	4	4	4	4	4	4	4	4	4	4	4	4	4	4	4	4	4
1.12826	2	30	7067	1	2	4	2	2	3	1	2	1	1	2	3	4	6	6	6	1	0	0	1	0	6	6	6	6	5	3	3	5	4	6	6	6	3	3	6	3	4	3	1	3	8	8	1	8	4
1.19483	1	43	3295	2	1	3	2	1	1	2	2	2	1	1	3	2	3	3	3	2	0	0	1	0	2	2	3	3	3	3	3	3	2	3	3	3	3	3	2	2	2	2	3	2	6	6	4	3	4
1.19	2	31	484	1	1	5	2	3	5	2	2	2	2	2	6	5	4	3	3	1	0	0	1	0	3	3	3	3	3	3	3	3	3	3	3	3	3	3	3	3	3	3	3	3	8	8	8	8	8
0.983333	2	58	884	3	1	4	2	6	1	1	1	1	1	1	4	2	3	3	3	2	0	0	1	0	4	4	4	4	6	3	6	3	6	6	6	2	6	6	2	6	2	2	4	6	8	8	8	8	7
1.09369	1	31	8140	1	2	2	2	5	1	1	1	5	5	2	3	5	5	5	5	1	0	0	1	0	5	5	5	5	5	5	5	5	5	3	5	5	5	5	5	5	5	5	5	6	8	8	8	8	8
1.19483	1	48	3292	2	1	2	2	1	5	2	1	2	2	2	3	3	2	3	3	2	0	0	1	0	5	3	4	3	5	5	4	3	4	6	5	5	3	3	4	6	5	5	3	3	8	8	8	5	8
1.19483	1	35	2817	2	1	4	2	2	3	1	1	3	1	1	3	3	5	5	5	1	0	1	0	0	2	3	5	3	4	2	4	4	5	4	6	6	6	2	2	6	6	2	1	4	8	8	8	8	8
1.12826	2	27	6493	1	2	4	2	1	6	2	1	2	1	2	4	4	6	3	2	2	0	0	1	0	3	2	5	5	3	2	3	5	3	3	4	2	6	6	6	6	6	3	4	2	4	4	4	2	4
1.19	2	31	674	1	1	5	2	1	1	2	2	2	2	2	2	3	2	3	3	2	0	0	1	0	3	3	3	2	3	3	3	2	3	3	3	3	3	3	3	3	3	4	3	3	5	5	5	5	5
1.105	2	39	1397	2	1	4	2	2	3	1	2	5	1	1	4	4	5	5	5	1	0	0	1	0	2	2	3	5	4	3	3	5	4	1	6	1	6	6	1	6	6	5	1	6	4	4	8	7	4
1.19	2	25	1430	1	1	5	2	1	1	1	1	2	1	2	4	3	3	3	4	1	0	0	1	0	6	6	6	6	4	3	3	5	2	2	1	2	2	6	2	6	2	1	2	2	6	5	4	5	4
1.08976	2	40	5012	2	2	4	2	1	5	2	2	2	2	3	4	4	3	3	3	1	0	0	1	0	4	5	5	5	5	5	5	4	4	6	6	6	6	6	6	6	6	2	6	4	8	8	8	8	8
1.18171	1	39	9105	2	2	4	2	2	1	1	2	3	2	2	2	4	5	5	5	2	0	0	1	0	5	5	5	5	3	3	3	5	5	6	6	3	3	2	5	6	3	2	6	6	8	8	8	8	8
1.19483	1	45	1254	2	1	1	2	2	5	3	3	3	3	3	7	6	6	6	6	1	0	0	0	1	6	6	6	6	6	6	6	6	6	6	6	6	6	6	6	6	6	6	6	6	1	1	1	4	4
1.09369	1	26	4622	1	2	4	2	1	5	1	1	2	1	1	4	4	2	2	6	1	0	0	1	0	2	2	6	6	3	1	2	4	2	1	6	1	4	2	3	6	2	1	3	2	8	8	8	8	8
1.18171	1	48	6270	2	2	2	2	1	1	2	1	2	2	2	2	3	5	5	5	2	0	0	1	0	5	4	5	5	3	2	2	5	6	3	3	2	3	2	2	3	3	2	1	3	3	4	4	3	4
1.09369	1	30	7049	1	2	5	2	2	1	2	2	2	2	2	4	4	2	2	2	1	0	0	1	0	2	3	3	3	3	3	3	5	2	2	2	3	3	3	2	6	2	3	4	3	8	8	4	8	6
1.18171	1	47	4313	2	2	5	2	2	1	1	2	3	1	1	2	3	5	5	5	1	0	0	1	0	5	5	5	5	5	5	5	5	5	5	5	5	4	1	5	5	5	5	1	4	3	5	1	2	1
1.19483	1	48	1482	2	1	5	2	6	3	2	2	1	2	1	2	3	2	2	2	1	1	0	0	0	4	4	4	4	4	2	3	2	2	2	2	2	2	2	2	2	2	2	2	3	5	2	5	5	5
1.08976	2	36	6590	2	2	2	2	1	1	1	1	1	1	1	3	2	2	1	1	1	0	0	1	0	1	3	5	2	3	1	1	3	3	2	3	1	1	5	3	1	2	3	3	4	3	3	7	2	6
1.09369	1	34	8618	1	2	4	2	2	2	4	3	3	3	4	3	3	4	5	4	1	0	1	0	0	5	4	4	4	4	4	4	5	2	4	4	2	2	4	2	2	3	3	1	4	3	3	4	3	4
1.12826	2	20	4014	1	2	3	2	1	6	1	1	1	2	5	4	6	6	2	2	2	0	0	1	0	6	6	6	6	6	6	6	6	6	3	6	6	6	6	6	6	6	6	6	6	8	8	8	8	8
1.19	2	31	464	1	1	3	2	2	1	2	1	2	1	2	4	4	3	4	4	1	0	0	1	0	2	4	4	4	2	3	3	4	3	2	3	4	2	2	2	4	2	3	3	2	4	5	5	3	5
1.19	2	29	554	1	1	5	2	3	2	1	1	1	5	1	4	3	2	4	5	1	0	1	0	0	2	2	2	2	2	2	4	5	2	2	2	5	2	6	6	2	1	4	3	6	4	4	5	5	6
1.09369	1	33	7068	1	2	5	2	4	3	2	2	5	2	2	4	4	2	2	3	1	0	0	1	0	2	6	2	6	2	2	2	2	2	2	3	3	3	2	2	3	3	4	4	6	5	5	5	8	6
1.12826	2	32	6410	1	2	4	2	2	1	1	1	1	1	1	3	4	2	2	2	2	0	0	1	0	3	3	3	3	1	1	2	4	3	3	3	3	3	3	3	3	3	3	3	3	4	4	4	4	4
1.18171	1	39	9420	2	2	5	2	2	2	1	2	2	1	2	3	3	4	5	5	2	0	0	1	0	5	5	5	5	5	4	3	5	5	5	6	2	6	6	5	5	6	6	1	6	8	8	8	8	8
1.105	2	39	1781	2	1	2	2	1	1	1	1	1	1	2	2	3	3	2	3	2	0	0	1	0	3	2	4	3	3	2	2	3	2	2	1	2	3	6	2	3	6	2	6	6	5	5	5	4	5
1.105	2	35	2390	2	1	4	2	5	5	1	1	2	1	2	2	4	4	4	4	2	0	0	1	0	4	3	4	5	3	3	3	4	4	3	6	2	2	3	2	3	2	2	1	6	3	5	3	3	3
1.12826	2	24	7082	1	2	4	2	2	3	3	1	2	2	2	4	2	2	3	2	1	0	1	0	0	5	2	3	2	3	3	4	4	4	4	2	2	2	2	2	2	4	2	2	3	4	4	4	4	5
1.105	2	38	958	2	1	4	2	1	1	1	1	1	2	1	4	3	2	3	2	1	0	1	0	0	2	2	4	2	1	1	2	5	1	1	3	5	5	1	1	3	3	1	5	2	6	7	7	1	7
0.672245	1	61	2312	3	1	4	2	1	5	1	1	1	1	1	4	2	2	2	3	1	0	0	1	0	3	2	2	2	5	2	2	5	3	2	1	1	2	3	1	2	1	2	3	4	5	3	2	4	5
0.672245	1	52	1890	3	1	4	1	5	5	1	1	1	1	1	4	2	1	1	2	1	0	1	0	0	2	2	2	4	1	1	2	5	1	1	2	3	4	1	2	4	3	2	4	2	5	6	6	1	5
1.19	2	34	1368	1	1	4	2	1	1	2	2	2	2	2	3	4	3	3	3	2	0	0	1	0	3	3	2	3	6	3	6	6	6	6	6	1	6	6	3	6	3	6	6	6	8	8	8	8	5
1.08976	2	45	8540	2	2	4	2	2	1	1	2	3	1	1	2	3	5	5	5	1	0	0	1	0	5	5	5	5	2	2	2	5	4	5	5	3	4	4	3	5	5	1	1	4	4	4	3	4	4
1.19	2	28	3218	1	1	2	2	1	1	1	1	1	1	2	4	2	2	2	2	2	0	0	1	0	2	2	5	4	1	1	3	2	4	2	3	1	4	2	1	2	2	2	4	4	4	3	6	2	5
1.06893	1	34	1284	1	1	5	1	1	1	2	1	3	1	1	4	2	1	1	1	1	0	1	0	0	1	2	5	2	2	3	1	5	1	1	2	1	6	5	1	5	2	1	1	2	6	5	6	6	7
1.08976	2	41	5229	2	2	5	2	3	1	2	2	1	1	1	2	4	5	5	5	1	0	1	0	0	1	4	2	2	1	2	3	4	2	2	4	4	5	2	2	4	2	2	2	3	4	4	3	5	5
1.46638	2	66	5184	3	2	4	2	1	5	1	1	1	1	1	4	4	3	2	3	2	0	0	1	0	3	5	5	4	3	3	2	4	4	3	3	3	2	3	3	6	6	2	6	4	4	4	4	4	4
1.09369	1	32	7022	1	2	5	2	3	4	2	1	2	2	2	4	2	1	2	2	1	0	0	1	0	1	1	3	3	2	2	2	5	1	1	1	1	1	4	1	1	1	4	4	2	4	2	4	4	6
1.105	2	43	2014	2	1	4	2	2	5	1	1	2	5	1	3	4	2	3	4	2	0	0	1	0	4	2	4	4	2	2	3	4	6	3	2	2	2	6	3	6	2	3	2	3	7	7	8	8	6
1.46638	2	56	6908	3	2	4	2	5	1	1	1	2	1	1	3	4	3	3	4	2	0	0	1	0	3	3	3	3	3	3	3	5	6	3	2	2	3	2	2	2	2	2	3	3	4	4	4	4	4
1.12826	2	28	4373	1	2	3	2	1	1	1	1	1	2	2	3	6	6	6	6	1	0	1	0	0	2	2	6	6	3	6	6	6	2	3	3	3	6	6	6	6	2	6	6	3	7	7	7	7	7
0.672245	1	74	686	3	1	5	2	5	5	1	2	3	1	1	4	4	4	4	4	1	0	0	1	0	2	4	3	3	3	3	1	5	3	4	2	2	1	2	1	1	3	2	2	3	6	6	6	5	6
1.12826	2	24	7710	1	2	4	2	2	1	2	1	2	2	2	4	4	4	4	4	2	0	0	1	0	5	5	5	5	3	2	6	6	6	6	6	6	6	6	6	6	6	6	6	6	8	8	8	8	8
1.19	2	31	1270	1	1	2	2	6	5	2	2	2	5	2	4	3	2	3	2	2	0	0	1	0	5	5	5	5	4	5	2	6	6	6	6	6	6	6	6	6	3	6	6	6	5	5	3	5	5
1.19483	1	35	461	2	1	5	2	3	5	2	2	2	2	2	4	4	1	2	2	1	0	1	0	0	2	2	4	1	3	1	3	3	2	2	2	2	2	2	2	2	2	2	2	3	5	5	5	5	5
1.08976	2	43	4821	2	2	4	2	6	1	2	5	5	2	5	3	5	5	5	5	2	0	0	1	0	5	5	5	5	5	3	4	5	5	6	6	3	6	2	5	5	5	3	1	6	8	8	8	8	8
1.12826	2	30	7052	1	2	5	2	1	1	2	2	2	2	2	4	4	3	3	3	1	0	0	1	0	2	4	4	4	4	4	4	4	3	6	6	6	4	2	6	6	6	2	6	4	4	3	2	2	4
1.19	2	25	3238	1	1	3	2	5	6	1	1	2	3	3	4	2	4	5	6	1	0	1	0	0	4	2	5	3	2	3	6	2	4	3	2	3	2	6	1	6	4	2	2	4	3	2	6	8	7
1.12826	2	24	7160	1	2	2	2	2	3	1	1	1	1	2	4	3	2	3	2	1	0	1	0	0	2	2	4	4	2	2	1	3	2	1	1	2	2	2	1	3	2	2	3	2	5	4	5	4	5
0.827273	1	58	5306	3	2	2	2	1	1	1	1	1	1	1	4	3	2	2	3	2	0	0	1	0	3	3	5	5	3	1	2	4	4	4	4	4	4	1	2	3	2	1	1	2	4	5	4	4	4
1.105	2	45	2016	2	1	3	2	1	1	1	1	2	3	2	3	4	5	5	5	2	0	0	1	0	3	3	3	3	3	3	3	6	3	3	6	6	3	6	6	6	6	3	6	3	8	8	8	8	8
1.19	2	31	1400	1	1	4	2	1	5	1	1	1	1	1	3	3	2	2	2	2	0	0	1	0	2	5	5	5	5	2	2	5	5	2	2	2	2	6	2	3	3	1	4	3	8	8	8	8	8
0.672245	1	72	3264	3	1	4	2	2	1	2	2	2	2	3	3	4	3	4	4	2	0	0	1	0	5	5	5	4	5	3	4	5	5	5	5	5	6	6	5	5	5	5	1	4	8	8	8	8	8
1.12826	2	29	5122	1	2	4	2	1	1	1	2	1	1	1	3	3	4	4	4	1	0	0	1	0	2	2	5	5	3	1	3	3	6	3	2	2	2	2	2	3	3	2	2	3	4	4	4	2	4
1.08976	2	48	4865	2	2	3	2	1	1	1	1	1	2	2	3	6	5	5	5	2	0	0	1	0	5	5	5	5	3	3	6	3	6	6	6	6	6	6	5	5	5	5	5	6	8	8	8	4	8
1.19483	1	49	354	2	1	5	2	4	3	1	1	2	1	1	4	2	4	3	2	1	0	0	1	0	2	3	1	4	5	4	4	5	4	3	1	1	1	4	5	2	2	4	5	5	5	5	5	5	4
1.06893	1	33	864	1	1	5	2	2	5	1	2	1	2	2	5	2	2	2	2	1	0	1	0	0	2	2	4	4	1	2	2	4	2	2	3	2	2	4	2	3	2	2	3	3	5	4	4	1	5
0.983333	2	72	1167	3	1	5	2	4	1	2	1	1	1	3	4	4	4	3	3	2	0	0	1	0	4	4	5	5	3	3	4	4	2	3	6	1	4	2	6	6	2	6	1	4	6	4	5	6	7
1.19	2	26	1405	1	1	3	2	2	5	1	1	1	2	4	5	3	2	2	1	1	0	0	1	0	2	2	6	6	6	6	6	6	6	2	6	6	6	6	6	6	6	6	6	2	8	8	8	8	8
1.19	2	25	1410	1	1	3	2	1	1	1	1	1	1	1	3	5	3	5	5	2	0	0	1	0	4	2	5	5	3	1	3	3	3	2	6	2	3	2	2	6	3	3	1	3	6	5	8	5	4
1.06893	1	31	281	1	1	4	2	4	4	2	1	2	2	2	4	4	2	1	1	1	0	0	1	0	1	3	2	2	3	3	2	5	2	2	1	1	2	4	2	1	2	4	5	4	5	2	4	4	4
1.12826	2	26	5531	1	2	3	2	5	5	1	1	1	1	1	4	4	3	3	3	1	0	0	1	0	6	6	6	6	3	2	3	4	3	3	6	6	6	6	6	6	6	6	6	6	8	8	8	8	8
1.19	2	23	1259	1	1	4	2	2	5	2	1	2	3	3	4	4	4	6	5	2	0	0	1	0	6	6	6	6	6	6	6	6	6	5	6	6	6	6	6	6	6	6	6	6	8	8	8	8	8
1.19483	1	37	692	2	1	4	2	3	1	3	2	2	2	3	4	4	3	3	3	1	0	0	1	0	2	3	4	2	4	3	3	5	3	4	3	3	6	3	3	3	3	4	3	6	6	5	6	5	6
0.983333	2	55	1892	3	1	2	2	1	1	1	1	2	1	1	4	5	3	3	3	1	0	0	1	0	2	3	4	5	4	2	3	4	4	6	2	6	6	6	2	2	2	3	3	6	3	5	4	5	4
1.105	2	48	3222	2	1	5	2	4	2	1	1	2	4	2	4	3	3	3	3	1	0	1	0	0	3	4	3	2	1	1	1	4	3	3	3	3	3	3	3	3	3	3	4	3	3	6	5	2	5
1.19483	1	46	1465	2	1	1	2	4	4	1	2	2	2	1	4	4	5	5	5	1	1	1	0	0	6	3	5	5	4	3	3	5	4	3	6	2	4	2	6	6	6	2	1	6	3	3	4	4	5
1.19	2	23	3238	1	1	1	2	1	5	1	1	1	2	2	4	6	6	6	6	1	0	0	1	0	6	6	6	6	6	6	6	6	6	6	6	6	6	6	6	6	6	6	6	6	4	4	4	4	4
1.105	2	44	687	2	1	4	2	5	5	1	1	2	1	3	3	3	6	6	6	2	0	0	1	0	3	3	5	3	3	4	2	2	5	5	5	1	1	3	5	6	3	1	1	3	3	2	3	3	7
1.18171	1	43	5164	2	2	4	2	1	1	1	2	5	2	2	4	4	6	2	3	1	0	1	0	0	2	4	4	3	3	3	3	4	2	1	3	1	2	6	2	2	2	4	5	6	5	5	5	4	6
1.18171	1	37	7540	2	2	2	2	6	1	1	1	2	1	1	4	3	4	5	4	2	0	0	1	0	5	5	5	5	4	2	3	5	5	5	1	1	3	3	1	5	2	1	1	6	4	5	4	3	5
1.06893	1	34	3152	1	1	2	2	1	1	2	2	5	2	2	3	4	5	4	4	2	0	0	1	0	4	3	4	4	3	3	3	4	4	4	3	3	3	3	3	3	3	3	2	4	5	4	8	5	4
1.08976	2	35	5130	2	2	4	2	1	5	2	2	3	2	3	4	4	3	3	3	2	0	0	1	0	3	2	4	2	3	4	2	5	3	3	2	1	2	2	4	2	3	3	3	3	3	3	4	4	4
1.19	2	31	1739	1	1	4	2	5	5	2	2	2	2	1	4	3	4	4	4	1	0	0	1	0	4	6	5	4	2	2	2	5	3	6	6	6	6	2	6	6	6	6	2	6	8	8	8	8	8
1.12826	2	32	6006	1	2	5	2	2	5	2	1	2	2	2	4	4	2	2	2	1	0	0	1	0	2	2	2	2	2	2	2	4	3	3	2	2	3	2	2	2	1	1	4	6	4	4	2	5	5
1.19	2	33	1531	1	1	2	2	5	3	2	2	2	1	2	4	4	2	6	4	2	0	0	1	0	2	3	5	5	2	2	2	3	3	3	2	3	2	6	2	3	3	1	5	6	5	5	5	4	4
1.08976	2	41	4790	2	2	4	2	2	5	4	1	2	2	2	3	4	5	5	5	2	0	0	1	0	5	5	5	5	5	3	3	5	5	5	5	5	5	5	5	5	5	5	3	5	1	1	1	1	1
1.19483	1	46	661	2	1	5	2	2	1	1	1	2	2	2	4	4	3	2	4	1	0	0	1	0	4	4	2	4	5	5	5	5	2	2	2	3	1	3	1	2	1	3	2	3	4	5	4	6	5
1.12826	2	31	6220	1	2	4	1	5	1	1	2	1	2	1	1	2	1	1	1	2	0	0	1	0	5	2	5	5	1	1	1	1	6	6	6	2	2	2	2	2	2	2	2	2	6	6	6	5	5
0.827273	1	65	7380	3	2	4	2	1	2	1	1	1	1	1	4	2	4	3	3	1	0	0	1	0	3	4	3	2	4	1	1	5	1	1	2	2	5	1	3	2	1	2	5	2	4	5	4	2	2
1.19	2	32	1453	1	1	5	2	1	1	1	1	2	2	2	3	4	2	2	2	1	0	1	0	0	2	1	2	3	3	1	1	2	1	2	1	4	6	2	1	6	1	4	4	6	8	6	7	5	7
0.672245	1	70	891	3	1	2	2	1	2	1	1	2	1	1	3	3	6	6	6	2	0	0	1	0	6	6	6	6	6	6	6	6	6	6	6	6	6	6	6	6	6	6	6	6	8	8	8	8	8
1.19	2	32	2609	1	1	2	2	1	5	2	1	1	2	2	4	3	6	6	6	1	0	0	1	0	1	5	5	5	4	4	4	4	3	2	6	1	4	2	5	5	3	6	4	6	1	1	4	1	1
1.105	2	35	3302	2	1	5	2	5	2	1	1	5	2	2	4	3	3	3	3	1	0	0	1	0	2	2	5	5	3	3	3	4	3	2	4	5	2	2	2	4	3	2	2	2	3	5	3	2	4
0.983333	2	53	3426	3	1	5	2	1	1	1	1	2	3	1	4	3	2	2	2	2	0	1	0	0	2	3	5	2	2	1	3	2	4	3	6	2	2	1	6	2	2	1	4	2	5	4	4	3	4
1.06893	1	33	2013	1	1	4	2	1	5	2	1	1	3	2	4	3	3	4	4	1	0	1	0	0	5	5	1	2	5	4	4	5	1	1	4	1	1	2	2	2	3	4	4	3	4	4	6	5	6
1.19	2	22	3850	1	1	3	2	1	6	5	5	5	5	5	3	3	3	3	3	2	0	0	1	0	3	3	3	3	4	4	4	4	4	5	4	4	4	4	5	5	3	4	6	6	4	5	4	4	4
1.12826	2	26	4632	1	2	4	2	1	2	1	1	2	2	1	4	4	1	2	2	1	0	1	0	0	2	2	6	6	1	1	1	2	2	1	6	2	6	2	2	3	2	2	4	3	6	6	4	6	6
0.672245	1	69	1415	3	1	4	2	2	1	1	1	1	1	1	4	4	3	3	3	1	0	0	1	0	3	3	4	3	4	3	4	5	3	3	3	1	3	2	2	2	2	5	2	3	5	5	5	5	5
0.983333	2	51	1346	3	1	3	2	1	5	1	1	2	2	1	7	5	6	6	5	2	0	0	1	0	6	6	6	6	6	6	6	6	6	6	6	6	6	6	6	6	6	6	6	6	8	8	8	8	8
1.19	2	23	672	1	1	3	2	1	1	2	2	1	1	2	4	2	2	2	2	1	0	0	1	0	2	2	4	4	3	2	3	4	3	2	2	2	3	2	2	2	2	3	4	2	5	4	4	4	5
1.105	2	38	3656	2	1	4	2	5	5	5	1	2	5	3	4	2	6	3	2	2	0	0	0	1	6	6	6	6	3	3	6	5	6	6	6	1	6	6	6	6	6	6	6	4	8	8	8	8	8
0.983333	2	52	1605	3	1	5	2	4	4	1	1	5	5	5	4	6	6	5	5	1	0	0	1	0	6	2	6	6	6	6	6	5	6	6	6	6	6	6	6	6	6	6	6	6	8	8	8	1	4
1.08976	2	45	4044	2	2	4	2	2	3	1	1	2	2	2	2	4	3	4	4	2	0	0	1	0	2	3	3	3	3	2	5	5	4	3	4	2	4	4	4	2	3	1	2	2	5	6	5	4	4
1.19	2	32	381	1	1	5	2	1	1	1	1	1	1	1	4	4	3	3	3	1	0	0	1	0	3	1	2	2	3	1	1	5	1	1	3	3	1	5	1	3	3	2	2	6	6	6	6	6	6
1.09369	1	34	4513	1	2	1	2	5	1	1	1	3	1	1	3	3	3	6	6	1	0	0	1	0	3	4	2	3	3	2	6	2	6	3	2	2	4	2	2	4	3	2	2	2	6	7	4	4	6
1.18171	1	39	5914	2	2	4	2	2	2	1	1	1	1	1	2	4	3	3	3	1	0	0	1	0	4	4	4	4	5	3	2	5	3	6	6	1	5	1	2	4	3	2	1	6	8	8	8	8	8
1.19	2	24	3158	1	1	2	2	1	1	1	1	1	1	1	3	4	1	2	3	2	0	0	1	0	6	6	6	6	6	6	6	6	6	6	6	6	6	6	6	6	6	6	6	6	5	4	8	4	5
0	2	69	#NULL!	3	#NULL!	5	2	5	5	1	1	3	1	1	2	1	3	5	5	2	0	0	1	0	5	5	5	5	5	5	5	5	5	5	5	3	6	3	5	6	6	6	1	5	8	8	8	8	8
1.18171	1	35	5209	2	2	2	2	5	1	1	1	2	2	1	2	4	5	5	5	2	0	0	1	0	4	3	5	4	3	2	4	5	5	3	3	2	3	5	3	6	3	2	1	3	3	5	4	4	3
0.983333	2	69	3227	3	1	4	2	2	1	1	2	5	2	1	3	4	2	3	3	2	0	0	0	1	3	2	5	3	6	2	3	6	5	3	3	2	3	3	1	2	3	1	1	2	8	8	8	4	8
1.18171	1	40	4318	2	2	4	2	1	5	1	1	2	2	2	3	3	4	4	4	1	0	1	0	0	4	3	5	5	3	1	3	5	2	3	3	2	2	2	3	2	3	3	2	4	6	6	5	5	6
1.19	2	29	262	1	1	4	2	2	5	1	1	2	2	5	4	4	2	2	2	1	0	1	0	0	2	2	6	6	6	1	6	6	3	3	3	3	3	3	6	6	6	6	6	6	4	4	4	4	7
1.105	2	43	1793	2	1	2	2	1	1	2	1	1	3	2	3	4	2	2	4	2	0	0	1	0	1	3	5	5	2	2	3	4	4	3	6	2	3	2	2	3	3	2	2	4	5	5	5	5	5
1.06893	1	20	2619	1	1	3	2	1	5	2	4	4	1	1	3	5	3	5	5	2	0	0	1	0	5	5	5	5	6	6	6	6	6	6	6	6	5	6	6	6	6	6	6	6	3	3	3	3	3
1.105	2	42	1394	2	1	3	2	2	2	1	1	2	5	2	4	4	4	4	5	2	0	0	1	0	4	4	5	5	3	3	2	5	5	2	6	3	6	2	5	6	5	2	1	3	4	5	5	3	3
1.105	2	48	2760	2	1	3	2	5	5	1	2	3	1	2	2	4	4	5	5	2	0	0	1	0	5	5	5	4	3	1	2	5	4	4	1	1	4	2	2	3	3	1	1	4	5	3	8	5	4
1.08976	2	44	5300	2	2	4	2	1	3	5	5	5	5	5	7	6	6	6	6	2	0	0	0	1	6	6	6	6	6	6	6	6	6	6	6	6	6	6	6	6	6	6	6	6	8	8	8	8	8
1.12826	2	28	4513	1	2	5	2	5	5	1	2	2	2	2	3	3	2	3	3	1	0	0	1	0	2	2	3	3	3	1	1	3	3	3	3	3	4	2	2	4	2	2	3	2	5	6	4	4	3
1.06893	1	32	192	1	1	4	2	3	1	2	1	2	2	2	3	4	4	4	4	1	0	0	1	0	4	5	5	2	4	3	3	4	2	2	1	4	3	2	3	3	3	3	3	4	4	4	7	3	4
1.19	2	33	958	1	1	5	2	1	5	1	1	1	1	1	4	3	3	3	3	1	0	1	0	0	2	2	5	5	4	5	1	4	3	2	2	2	2	4	2	2	4	1	1	2	5	5	4	3	5
1.19483	1	41	3041	2	1	3	2	1	2	1	1	4	2	1	2	2	5	5	5	2	0	0	1	0	4	4	3	5	1	2	3	4	3	3	3	1	3	1	1	4	4	2	1	3	6	3	3	4	8
1.12826	2	29	7018	1	2	3	2	6	1	1	2	2	2	1	4	4	2	2	2	1	0	1	0	0	2	3	3	3	3	5	5	5	2	3	4	4	3	3	2	4	3	4	5	2	6	5	5	5	5
1.08976	2	42	5089	2	2	4	2	1	5	1	1	2	2	2	4	6	6	6	6	2	0	0	1	0	6	6	6	6	4	3	3	6	6	6	6	6	6	6	6	6	6	6	6	6	8	8	8	8	8
1.08976	2	40	6813	2	2	4	2	1	1	2	2	3	1	2	4	4	4	4	4	1	0	0	1	0	2	4	5	5	3	3	3	4	3	4	4	3	2	3	2	4	2	2	2	3	5	5	4	5	5
1.19483	1	35	3520	2	1	3	2	5	5	1	2	2	2	1	2	5	5	5	5	2	0	0	1	0	5	4	5	4	5	5	4	5	5	6	5	3	6	3	5	5	5	5	1	6	3	3	3	2	3
1.08976	2	35	5300	2	2	2	2	1	1	1	1	2	2	1	3	4	3	4	5	2	0	0	1	0	5	5	5	5	4	3	5	5	5	3	5	6	6	6	6	6	3	2	1	6	8	8	8	8	8
1.08976	2	39	9514	2	2	5	2	4	1	1	2	1	2	1	4	3	2	2	2	1	0	0	1	0	3	3	4	4	6	3	6	5	6	6	6	6	6	6	6	6	6	6	6	6	4	5	2	3	7
1.19483	1	35	1406	2	1	5	2	1	5	2	2	2	2	2	3	4	4	4	4	2	0	0	1	0	5	5	5	5	5	4	5	5	5	5	5	5	5	5	5	4	4	5	5	6	3	3	3	3	3
0.827273	1	69	7300	3	2	2	2	1	1	1	5	4	2	2	4	3	4	3	3	2	0	0	1	0	3	3	2	4	3	3	3	6	6	6	3	6	2	3	4	6	6	2	1	6	4	5	3	2	8
1.19483	1	36	3430	2	1	4	2	1	1	1	1	1	1	2	5	3	6	6	6	1	0	0	1	0	6	6	6	6	6	6	6	6	6	6	6	1	6	6	6	6	6	6	6	6	8	8	8	6	6
0.672245	1	50	2387	3	1	4	2	1	1	2	5	5	2	5	4	4	6	6	6	1	0	0	1	0	6	6	6	6	3	2	3	5	3	6	2	2	2	2	6	6	6	6	5	6	8	2	8	2	5
1.19483	1	46	173	2	1	5	2	1	2	1	1	4	1	1	1	6	5	5	5	1	0	0	1	0	5	4	5	4	4	4	4	5	5	5	6	6	6	6	5	5	5	6	1	6	8	8	8	8	8
1.105	2	40	1151	2	1	5	2	1	1	2	4	1	3	2	5	4	4	3	2	2	0	0	1	0	3	4	5	4	3	1	3	5	4	6	6	3	3	4	1	2	1	5	5	3	5	5	6	7	7
1.19	2	32	557	1	1	4	2	2	4	1	2	5	5	3	4	4	3	4	4	1	0	0	1	0	3	2	5	5	3	3	6	5	4	3	6	1	6	2	3	6	6	4	2	4	8	4	3	8	5
1.12826	2	24	5010	1	2	4	2	2	5	5	5	5	5	5	5	3	1	1	1	1	0	1	0	0	1	6	6	6	6	6	6	5	6	6	6	6	6	6	6	6	6	6	6	6	8	8	8	8	8
0.827273	1	62	6005	3	2	4	2	4	4	1	1	3	1	1	3	6	4	5	5	1	0	0	1	0	5	5	5	5	5	5	5	5	5	5	6	6	5	6	5	1	3	5	1	5	1	1	1	1	1
1.12826	2	30	6005	1	2	5	2	1	5	1	1	5	1	1	4	4	4	4	4	1	0	0	1	0	4	4	4	4	5	5	6	5	3	6	6	6	6	6	5	5	5	5	1	4	8	8	8	8	8
1.08976	2	35	7093	2	2	4	2	1	1	1	2	2	2	1	4	4	6	4	4	1	0	0	1	0	4	2	4	4	4	2	2	5	4	3	3	2	5	5	4	6	4	1	2	6	4	4	4	3	3
1.08976	2	45	4877	2	2	2	2	5	5	1	1	2	2	2	4	3	3	3	3	2	0	0	1	0	3	3	5	5	3	2	3	5	4	3	6	6	3	2	3	3	3	2	2	3	4	4	4	2	4
0.672245	1	71	1263	3	1	5	2	6	6	2	2	4	2	2	6	1	5	5	5	2	0	0	1	0	5	5	5	5	5	4	5	5	5	5	5	5	5	5	5	5	5	6	5	5	1	1	1	1	1
0.983333	2	52	1605	3	1	5	2	4	4	2	2	5	2	2	3	4	6	5	5	1	0	0	1	0	3	5	5	5	5	3	5	5	6	6	6	3	6	2	6	6	6	6	2	6	3	4	2	2	4
1.46638	2	61	5582	3	2	3	2	1	1	1	1	1	1	1	2	3	3	4	4	2	0	0	1	0	4	4	5	3	3	3	3	4	4	3	3	3	3	2	3	3	3	2	2	6	4	5	4	3	4
1.19483	1	36	1453	2	1	3	2	2	4	2	1	2	2	2	3	4	3	3	3	1	0	0	1	0	3	3	5	5	6	6	6	6	3	3	3	6	6	2	6	6	6	6	6	6	4	4	4	6	6
0.672245	1	69	2840	3	1	3	2	2	1	1	2	1	2	1	3	2	3	3	4	2	0	0	1	0	5	3	4	3	3	3	2	4	3	2	2	1	4	1	1	2	1	1	4	2	5	4	2	5	4
1.19	2	31	3115	1	1	3	2	1	1	2	1	4	3	2	3	4	3	3	3	2	0	0	1	0	3	3	3	3	4	3	3	3	4	3	4	3	3	3	3	4	4	4	3	6	5	5	4	5	5
1.12826	2	32	6104	1	2	5	2	5	1	1	1	2	1	1	4	2	2	4	3	1	0	0	1	0	2	6	6	6	5	2	3	5	3	2	1	1	2	3	2	6	2	2	6	6	6	7	5	4	7
1.12826	2	30	6005	1	2	5	2	1	5	1	1	3	1	1	7	4	5	5	5	1	0	0	1	0	5	5	5	5	5	6	6	5	5	5	5	5	5	5	5	5	5	5	5	5	8	8	8	8	8
1.08976	2	37	4633	2	2	2	2	2	3	1	1	1	1	1	3	5	2	4	5	2	0	0	1	0	3	6	6	6	5	5	3	5	5	6	6	2	6	2	4	6	2	1	1	6	2	4	2	4	3
1.12826	2	34	5363	1	2	3	2	1	1	2	1	2	2	1	3	4	5	5	5	2	0	0	1	0	2	3	4	3	2	3	3	4	2	3	4	2	3	2	2	2	2	2	3	3	4	3	6	5	6
1.19	2	26	1767	1	1	2	2	1	5	5	1	2	5	1	3	5	5	5	5	2	0	0	1	0	5	5	5	5	5	6	5	5	5	5	5	5	5	5	5	5	5	5	1	5	3	3	2	2	8
1.08976	2	44	5705	2	2	2	2	6	1	1	1	5	1	1	2	3	4	4	5	2	0	0	1	0	4	6	5	5	3	3	3	6	3	6	6	6	5	5	1	6	3	1	3	6	7	7	4	4	4
0.983333	2	57	3427	3	1	5	2	1	2	1	1	1	2	2	2	4	3	3	3	2	0	0	1	0	4	4	4	4	2	1	5	5	4	2	3	2	2	1	2	2	2	2	1	3	3	3	6	6	5
1.12826	2	34	5063	1	2	4	2	4	1	2	2	2	2	2	3	3	3	3	3	1	0	0	1	0	3	3	3	3	3	3	3	3	3	3	3	3	3	3	3	3	3	3	3	3	4	4	5	4	4
1.46638	2	56	5251	3	2	4	2	5	4	1	1	2	1	2	4	4	2	3	3	1	0	0	1	0	2	4	4	4	3	3	3	4	3	2	3	3	3	3	2	3	2	3	3	3	5	5	4	4	5
1.19483	1	45	2033	2	1	5	2	1	1	1	2	2	2	1	4	3	3	3	3	1	0	1	0	0	2	3	3	2	6	3	3	3	2	2	2	1	1	4	6	6	6	3	6	6	5	4	6	6	6
1.19483	1	48	3919	2	1	4	2	1	1	2	2	3	1	1	4	3	2	3	3	2	0	0	1	0	2	3	4	4	4	3	2	4	2	2	3	2	4	2	2	4	2	2	4	2	4	4	8	3	3
1.12826	2	20	4021	1	2	2	2	1	2	2	2	5	5	2	4	5	4	4	4	2	0	0	0	1	3	3	3	6	3	3	5	6	6	6	6	6	6	6	6	6	6	6	6	6	4	4	4	4	4
1.06893	1	32	194	1	1	5	2	2	1	1	1	2	2	1	4	3	3	4	5	1	0	0	1	0	4	3	2	1	3	2	4	5	2	1	3	1	1	1	1	3	1	2	1	3	2	3	7	7	6
1.06893	1	30	1358	1	1	1	3	1	1	3	3	3	3	3	2	3	3	3	3	1	0	0	0	1	3	3	3	3	3	3	3	3	3	3	2	3	3	3	3	3	3	3	3	3	4	4	4	4	4
1.19	2	30	982	1	1	5	3	3	2	1	2	1	3	3	2	3	3	2	2	2	0	0	1	0	3	3	3	3	3	3	3	3	3	3	3	3	4	4	3	3	3	4	3	6	4	4	4	4	4
1.09369	1	19	5052	1	2	1	2	4	1	1	1	2	1	1	2	2	5	5	5	1	0	0	1	0	5	5	5	5	3	4	3	5	3	2	2	1	3	3	3	3	3	1	1	2	5	5	3	5	6
1.06893	1	33	195	1	1	5	2	2	4	1	2	2	2	2	4	3	2	2	2	1	0	1	0	0	2	2	2	1	2	2	2	3	3	2	2	3	3	3	2	2	3	4	2	3	5	5	4	5	5
1.19	2	22	1475	1	1	3	2	1	5	1	1	1	1	1	4	3	3	3	2	1	0	0	1	0	2	2	4	3	1	1	1	2	2	1	3	2	2	2	2	2	2	2	3	3	6	5	6	5	7
1.19	2	24	3150	1	1	4	2	1	5	1	2	1	1	1	3	2	3	3	3	2	0	0	0	1	3	3	3	2	3	2	3	2	3	3	3	4	3	3	3	3	3	3	3	3	5	5	5	6	5
1.12826	2	29	4306	1	2	3	2	1	5	1	1	2	2	1	3	4	5	5	5	1	0	0	1	0	2	4	4	3	1	3	3	4	3	6	2	2	2	2	2	4	3	1	1	2	3	4	3	2	3
1.06893	1	18	1615	1	1	3	1	3	2	1	1	4	2	3	2	2	4	2	3	1	0	1	0	0	1	3	3	3	2	1	4	5	3	4	4	1	2	6	1	3	2	4	4	3	4	3	4	7	5
1.06893	1	24	3208	1	1	4	2	2	2	2	2	1	1	1	4	3	2	2	3	2	0	1	0	0	2	3	3	2	2	2	2	3	3	2	2	2	3	3	1	2	2	3	3	2	4	5	6	5	5
1.09369	1	32	5162	1	2	3	2	2	1	1	2	3	2	2	4	4	3	3	3	1	1	0	0	0	3	2	2	1	2	3	3	4	2	3	3	3	4	1	1	4	2	2	2	6	5	5	5	3	6
1.19	2	30	486	1	1	3	2	1	2	3	2	4	2	1	2	4	4	2	2	2	0	0	1	0	4	4	4	4	4	4	4	4	2	2	1	2	2	2	4	4	3	4	4	3	4	4	3	6	6
1.19	2	23	1970	1	1	4	2	2	1	1	1	5	1	2	2	5	5	5	5	1	0	0	1	0	5	4	5	5	5	3	6	5	2	3	2	1	2	6	3	3	3	1	1	6	2	3	6	5	4
1.09369	1	22	5004	1	2	1	1	3	2	2	3	5	3	4	2	3	4	2	3	1	1	0	0	0	5	3	5	3	4	2	5	4	4	3	4	5	6	4	2	3	5	4	5	5	3	7	4	6	4
1.19	2	26	2360	1	1	2	2	6	5	2	1	2	2	2	4	4	3	3	3	2	0	0	1	0	2	3	3	3	4	3	4	4	3	3	3	3	3	4	4	2	2	1	3	3	4	4	4	4	4
1.06893	1	30	10	1	1	4	1	2	4	2	1	1	4	1	2	1	3	1	1	1	0	0	1	0	2	3	3	2	3	2	1	3	3	1	3	2	3	3	3	3	3	3	2	1	5	5	4	5	5
1.12826	2	34	4327	1	2	4	1	2	3	1	1	1	2	1	4	2	2	2	2	2	0	0	0	1	2	2	2	3	2	1	1	3	3	3	2	2	4	4	4	2	3	2	3	2	5	6	4	3	5
1.19	2	30	648	1	1	3	2	1	5	1	1	1	1	1	3	3	2	2	2	2	0	0	0	1	6	6	6	6	6	3	3	3	6	6	6	6	6	6	5	3	6	6	6	3	2	3	2	6	5
0.983333	2	51	1187	3	1	3	2	2	2	2	3	3	3	3	3	3	4	4	4	2	0	1	0	0	2	5	5	5	3	2	3	5	5	3	6	3	5	2	5	6	3	2	1	4	3	4	2	2	3
1.19	2	21	2838	1	1	3	1	1	5	1	1	2	1	1	4	3	3	3	4	2	0	0	0	1	2	3	6	3	2	3	6	2	3	2	3	6	6	6	3	4	6	1	3	6	6	6	6	6	6
1.19	2	19	2743	1	1	3	3	1	5	2	1	1	1	1	5	3	5	3	3	2	0	0	1	0	2	2	3	3	2	2	2	1	3	2	4	3	2	2	4	2	2	2	3	2	6	5	5	6	6
1.12826	2	34	5036	1	2	2	2	1	4	2	2	3	2	3	3	3	3	3	3	1	0	0	1	0	3	2	3	4	3	3	3	3	3	3	2	3	3	2	2	3	2	2	3	3	4	4	3	4	5
1.12826	2	22	5550	1	2	2	2	1	3	1	1	1	2	2	3	3	3	3	3	2	0	0	1	0	2	3	2	3	3	2	2	4	3	3	2	3	2	2	2	3	2	2	1	2	5	6	4	6	5
1.19	2	33	3320	1	1	2	2	1	1	1	1	1	2	1	1	6	6	6	6	2	0	0	1	0	6	6	6	6	6	6	6	6	6	6	6	6	6	6	6	6	6	6	6	6	2	2	2	2	2
1.08976	2	35	5353	2	2	5	2	1	5	1	5	2	5	1	4	3	3	2	2	2	0	0	1	0	2	2	4	4	1	1	2	4	2	2	2	1	2	3	1	3	2	2	5	2	6	6	5	5	5
1.19	2	30	3123	1	1	4	2	1	2	2	2	5	2	2	3	3	4	4	4	1	0	1	0	0	2	2	5	6	4	2	2	4	2	2	2	1	2	4	2	2	2	1	2	3	4	2	3	4	4
1.06893	1	32	496	1	1	3	1	2	2	2	3	1	3	1	3	2	2	4	2	1	0	1	0	0	3	4	2	2	3	2	4	3	4	2	2	4	1	3	5	1	2	4	4	2	6	3	5	5	6
1.12826	2	19	4706	1	2	3	2	1	1	1	4	3	2	3	3	3	5	5	4	1	1	0	0	0	3	4	1	3	2	3	4	4	2	3	4	6	4	5	2	3	2	4	2	4	5	5	4	4	5
1.09369	1	32	4373	1	2	2	1	1	5	1	1	5	1	1	3	1	5	5	5	1	0	0	1	0	2	4	5	5	1	1	3	6	3	3	6	1	1	1	3	3	3	3	1	3	7	7	7	7	7
1.06893	1	24	554	1	1	5	1	2	3	2	1	2	2	1	4	1	2	2	2	1	0	1	0	0	2	2	3	3	2	4	2	3	3	3	1	1	2	5	3	4	3	1	5	3	4	3	3	5	6
1.06893	1	28	760	1	1	4	1	3	4	1	1	1	1	1	5	1	2	1	1	2	0	1	0	0	2	2	4	4	1	4	1	2	2	3	1	3	1	1	2	3	4	1	1	1	5	6	6	6	6
0	1	36	#NULL!	2	#NULL!	3	2	3	4	1	2	2	2	2	4	2	2	5	1	1	1	0	0	0	3	1	1	3	5	3	3	1	3	4	1	1	4	1	3	3	1	1	1	3	4	6	4	4	3
1.06893	1	20	2849	1	1	2	1	1	2	1	1	1	2	1	4	3	2	3	2	2	0	0	1	0	3	2	2	3	2	1	2	2	3	2	3	4	2	3	1	3	4	1	2	3	6	6	4	5	5
1.09369	1	33	6260	1	2	3	2	2	1	1	1	3	2	1	2	4	3	3	3	2	0	1	0	0	3	5	5	5	5	3	3	3	3	3	2	1	2	4	2	4	2	4	2	3	5	5	4	4	5
0	1	23	#NULL!	1	#NULL!	4	2	2	2	1	1	1	2	2	5	2	2	5	5	1	0	1	0	0	2	2	4	4	1	2	2	5	2	2	2	1	3	3	2	3	1	2	4	3	5	5	4	5	6
1.19	2	19	1397	1	1	1	2	5	5	1	1	1	2	5	4	3	2	2	2	2	0	1	0	0	2	3	6	6	3	1	3	5	2	2	6	6	6	6	1	1	2	6	6	6	3	1	4	4	5
1.09369	1	29	4087	1	2	5	1	4	4	1	1	3	4	3	5	3	2	4	2	1	1	0	0	0	1	1	3	1	2	2	1	3	3	1	5	3	1	1	1	1	1	3	1	3	7	7	7	7	7
1.09369	1	33	6260	1	2	3	2	1	1	2	2	3	2	2	1	3	3	3	4	1	0	1	0	0	2	4	4	4	4	4	3	4	4	2	3	1	3	3	2	4	3	3	2	6	4	5	4	3	5
1.09369	1	25	6543	1	2	4	1	2	3	2	2	4	2	4	2	1	2	4	4	1	1	0	0	0	2	2	2	5	2	3	4	4	3	2	3	1	3	1	4	3	3	3	2	2	4	5	7	5	5
1.06893	1	22	2624	1	1	4	1	1	1	2	2	2	2	2	4	2	2	2	2	2	0	0	1	0	2	2	2	2	2	2	2	2	2	2	2	2	2	2	2	2	1	2	2	2	2	2	2	2	2
1.06893	1	29	3475	1	1	4	2	2	1	1	1	2	2	1	3	2	3	4	5	1	0	0	1	0	5	4	3	3	1	4	2	3	4	2	3	2	5	1	2	4	3	1	1	2	8	8	7	5	6
1.06893	1	34	3013	1	1	3	1	1	1	2	2	2	2	3	4	2	3	3	4	1	0	1	0	0	3	3	2	4	2	2	2	2	2	2	2	2	3	3	2	2	2	3	1	2	5	5	5	4	5
1.09369	1	21	8009	1	2	4	2	1	5	2	2	2	2	2	4	2	2	2	2	1	0	0	1	0	5	5	5	5	5	5	5	5	4	4	4	4	4	4	4	4	4	4	4	2	5	5	5	5	5
1.105	2	47	2032	2	1	2	2	1	2	1	2	2	1	1	4	3	2	2	3	2	0	0	0	1	1	2	5	5	2	1	1	2	2	1	1	2	1	1	1	2	2	2	2	2	6	5	5	6	4
1.06893	1	19	2009	1	1	1	1	2	3	2	1	2	2	2	3	2	2	3	1	1	0	1	0	0	2	5	3	1	4	1	2	4	2	1	3	2	2	4	3	4	4	3	4	2	8	8	8	8	8
1.12826	2	33	5132	1	2	3	2	1	6	1	1	5	2	2	7	4	5	5	5	2	0	0	1	0	5	5	5	5	5	5	5	5	5	6	5	5	6	6	5	5	5	5	1	6	8	8	8	8	8
1.06893	1	21	3424	1	1	2	1	2	6	1	2	1	1	1	3	3	1	1	1	2	0	0	0	1	2	2	2	3	2	2	3	2	2	4	4	3	1	2	3	3	4	2	2	2	4	3	3	6	5
1.19	2	27	3330	1	1	3	2	1	5	1	1	1	1	1	5	3	3	3	3	2	0	0	1	0	5	2	4	3	3	1	2	3	4	3	4	3	2	6	4	4	3	4	2	6	4	4	4	4	3
1.19	2	29	560	1	1	5	2	1	5	2	1	2	1	2	4	4	2	1	1	1	0	1	0	0	1	3	4	2	3	3	1	3	3	3	4	2	2	2	2	2	2	2	4	2	5	5	3	3	4
0.983333	2	58	190	3	1	2	2	1	3	1	1	2	1	1	3	4	3	3	3	2	0	0	1	0	4	3	4	5	3	5	2	5	4	6	6	2	6	6	4	6	6	2	2	3	6	7	4	8	4
1.06893	1	32	2609	1	1	3	1	1	4	1	1	1	1	2	2	2	1	1	1	2	0	0	1	0	1	2	1	2	1	2	3	3	1	1	2	1	1	1	2	2	2	1	2	1	4	5	7	3	5
1.12826	2	23	7027	1	2	1	2	1	2	1	1	1	1	1	4	3	6	6	6	2	0	0	1	0	3	6	5	5	1	1	1	5	6	1	1	1	1	1	3	3	2	3	3	1	7	4	3	4	7
1.12826	2	34	7068	1	2	5	2	1	2	1	1	1	2	2	4	3	2	2	2	1	0	0	1	0	1	3	2	3	1	2	4	4	1	1	2	2	2	2	1	2	1	2	3	2	3	4	5	2	5
1.06893	1	31	1423	1	1	5	1	3	2	2	3	3	4	2	2	1	1	1	2	2	1	0	0	0	4	3	2	2	4	3	3	1	3	4	4	3	2	2	2	1	2	4	4	3	5	3	4	5	4
1.19	2	32	1184	1	1	5	3	6	6	1	1	1	1	1	1	6	6	6	6	2	0	0	0	1	6	6	6	6	6	6	6	6	6	6	6	6	6	6	2	4	5	2	5	6	2	2	2	5	2
0.827273	1	62	9019	3	2	1	2	5	4	1	1	3	3	1	3	3	5	5	5	2	0	0	1	0	5	5	5	5	5	3	2	5	5	5	3	3	1	2	4	5	5	1	1	4	3	3	8	1	3
1.19	2	31	550	1	1	4	2	1	1	1	1	3	1	2	2	4	5	5	5	1	0	1	0	0	2	3	5	3	3	3	4	5	3	3	4	2	2	3	5	3	4	1	1	6	3	5	6	2	5
1.06893	1	34	3152	1	1	2	2	1	1	2	1	2	2	2	3	3	2	3	3	1	0	0	0	1	2	3	2	3	2	3	3	3	2	2	3	1	2	3	2	6	2	2	3	3	4	5	5	5	5
1.46638	2	62	4310	3	2	3	2	1	5	1	2	2	1	1	3	4	6	6	6	2	0	0	1	0	2	3	5	5	4	4	3	4	3	3	3	3	2	4	2	2	2	2	4	3	7	7	8	2	8
1.09369	1	30	8533	1	2	2	1	5	5	5	5	5	5	5	5	2	1	1	1	1	1	0	0	0	1	1	1	1	1	1	1	1	1	1	1	1	1	1	1	1	1	1	1	1	7	7	7	7	7
1.06893	1	22	2450	1	1	3	2	1	5	2	1	4	2	3	2	2	2	3	3	1	0	0	1	0	2	3	3	4	1	2	3	2	2	3	3	3	3	4	2	5	2	3	2	2	5	4	2	5	6
1.12826	2	23	5265	1	2	3	2	1	2	2	2	2	2	2	3	3	3	3	2	1	0	1	0	0	2	3	4	3	2	3	2	3	3	2	2	3	2	3	4	3	2	5	5	2	5	5	4	4	3
1.09369	1	33	7820	1	2	5	1	2	4	2	2	1	1	1	2	1	3	2	3	1	1	0	0	0	1	2	2	4	2	4	1	4	3	1	2	3	4	1	2	1	2	2	3	2	6	7	6	5	4
1.06893	1	28	2000	1	1	1	1	2	3	1	3	1	3	4	2	2	4	3	5	1	1	0	0	0	4	1	2	1	4	3	6	1	4	5	1	3	2	1	1	1	2	1	4	2	5	6	5	2	3
1.06893	1	31	2000	1	1	3	1	1	5	2	1	1	1	2	4	1	3	3	1	1	0	0	1	0	5	1	3	3	3	4	3	3	4	2	1	1	1	1	1	1	3	1	3	2	2	4	5	3	6
1.12826	2	27	4250	1	2	5	2	5	5	1	1	1	1	1	4	5	3	3	3	1	0	0	1	0	3	2	6	6	4	3	1	5	3	2	3	1	2	2	1	6	2	4	6	2	5	5	4	5	5
1.12826	2	26	7030	1	2	4	2	5	5	3	3	3	3	3	7	6	6	6	6	2	0	0	0	1	3	3	3	3	6	6	6	6	6	6	6	6	6	6	6	6	6	6	6	6	8	8	8	8	8
1.12826	2	26	6216	1	2	5	1	3	2	2	2	2	2	2	3	3	3	2	2	1	1	0	0	0	1	2	1	2	2	2	2	2	2	2	2	2	2	2	2	2	2	2	2	2	5	5	5	5	5
1.12826	2	23	4520	1	2	3	2	4	1	1	1	1	1	1	5	4	5	5	5	2	0	0	1	0	1	1	5	5	2	2	2	4	3	1	6	1	2	6	2	5	2	5	5	6	8	8	8	7	7
1.06893	1	20	2040	1	1	1	1	2	4	2	4	4	1	4	6	3	4	4	4	2	0	1	0	0	4	2	5	2	4	4	5	1	3	3	1	4	4	4	5	1	3	4	6	4	4	4	3	5	4
1.09369	1	28	7091	1	2	2	2	1	1	1	1	3	1	2	4	2	4	1	6	2	0	0	1	0	1	2	5	6	2	1	2	6	1	1	2	5	1	5	1	1	1	1	5	2	7	6	7	7	5
0.672245	1	67	2323	3	1	4	2	2	2	1	1	2	1	1	4	2	3	3	3	1	0	1	0	0	3	3	3	3	3	3	3	6	3	3	3	3	3	3	2	2	2	2	2	3	8	8	8	8	8
1.09369	1	24	5004	1	2	1	1	4	1	2	3	1	4	4	3	2	3	2	2	1	0	0	1	0	1	2	3	1	4	5	2	4	3	2	5	4	3	2	2	1	5	5	4	1	4	5	3	6	6
1.09369	1	34	5419	1	2	4	1	3	2	1	1	1	1	2	3	2	2	3	1	1	1	1	0	0	3	1	3	1	1	1	3	1	2	2	1	2	1	1	1	2	1	2	2	1	6	6	7	8	7
1.06893	1	25	158	1	1	5	2	1	2	2	2	1	3	3	4	2	2	3	3	1	0	1	0	0	2	2	3	3	3	2	3	3	3	3	2	3	3	2	2	2	2	3	2	4	5	5	4	5	6
1.09369	1	23	7010	1	2	3	1	3	3	3	1	2	3	3	4	4	2	5	2	1	0	1	0	0	2	1	1	1	3	2	2	4	4	4	2	1	5	3	4	3	4	3	3	5	2	5	4	4	4
1.19	2	23	3037	1	1	4	3	6	6	5	1	5	5	5	7	6	6	6	6	2	0	0	0	1	6	6	6	6	6	6	6	6	6	6	6	6	6	6	6	6	6	6	6	6	8	8	8	8	8
1.06893	1	19	1476	1	1	1	1	2	3	2	2	3	3	5	6	4	3	4	3	2	0	1	0	0	3	2	3	6	4	4	3	4	5	2	3	6	6	6	3	2	4	3	4	4	8	3	8	2	4
1.12826	2	33	4031	1	2	4	2	2	1	5	5	5	5	5	7	5	5	5	5	1	0	0	1	0	5	5	5	5	5	3	4	5	3	6	2	4	6	2	5	5	5	6	1	6	8	8	8	8	8
1.09369	1	32	7870	1	2	2	2	2	2	1	1	2	1	1	3	4	1	2	2	1	0	1	0	0	1	1	4	3	1	1	1	1	3	3	3	3	3	3	6	6	3	6	6	6	2	4	3	2	3
1.06893	1	23	260	1	1	3	1	2	2	3	2	4	3	3	3	2	3	4	3	1	1	0	0	0	3	2	3	2	2	2	4	2	4	3	3	3	3	2	3	5	3	3	3	4	5	4	4	4	4
1.09369	1	31	4865	1	2	4	1	1	2	2	3	2	1	1	2	2	4	3	4	1	1	0	0	0	1	2	1	3	2	1	2	4	2	3	4	2	3	4	1	5	4	2	3	5	2	5	4	7	6
1.12826	2	23	4351	1	2	4	2	1	1	1	1	2	2	1	3	3	3	4	5	1	0	0	1	0	4	3	5	4	4	3	3	5	5	3	3	4	2	2	3	4	3	2	5	4	3	3	3	5	3
1.19	2	29	262	1	1	4	2	2	5	5	5	5	5	5	4	4	6	6	6	1	0	1	0	0	6	6	6	6	6	6	2	6	6	6	2	2	6	6	6	6	6	6	6	6	4	4	4	4	4
1.06893	1	34	1084	1	1	4	2	4	1	1	2	2	2	2	2	4	5	5	5	1	0	1	0	0	4	2	5	1	5	4	4	5	1	4	4	2	6	6	5	5	5	5	3	5	1	1	4	2	3
1.12826	2	34	4760	1	2	5	2	4	2	2	2	2	2	2	2	2	2	2	2	1	0	1	0	0	2	3	3	4	2	2	2	2	2	2	2	2	2	1	2	2	1	2	3	2	5	5	5	6	5
1.06893	1	18	2345	1	1	2	3	2	4	1	3	2	1	4	7	4	3	4	2	1	0	1	0	0	1	1	3	1	2	6	4	2	6	5	3	1	1	1	5	3	1	5	3	4	2	4	3	3	3
1.19	2	23	565	1	1	3	2	1	4	1	1	1	2	2	4	4	3	3	2	1	0	1	0	0	2	2	5	5	4	2	4	1	3	2	2	4	3	2	3	4	2	3	4	2	5	4	8	5	6
1.19	2	20	777	1	1	2	1	1	1	4	2	4	2	3	4	2	3	2	2	1	0	1	0	0	3	4	3	3	5	3	2	2	1	4	2	2	1	2	3	5	3	1	2	3	6	2	4	3	5
1.12826	2	19	4270	1	2	2	2	1	3	1	1	2	2	2	4	3	4	6	3	2	0	0	0	1	2	3	4	5	2	2	4	4	6	4	2	6	3	6	4	6	6	4	6	6	3	5	3	4	5
1.12826	2	18	7072	1	2	2	2	1	6	2	1	1	2	2	4	3	2	2	2	1	0	0	1	0	2	1	3	4	1	4	1	2	3	2	1	3	2	4	2	6	2	1	3	3	6	7	5	5	4
1.09369	1	27	5015	1	2	5	2	4	1	1	2	2	1	1	4	2	2	3	2	1	0	0	1	0	2	4	4	4	4	2	3	5	2	2	4	2	6	6	2	3	3	4	4	4	3	3	4	2	6
1.06893	1	27	2815	1	1	4	2	5	1	2	2	2	1	2	2	2	2	3	1	1	0	0	1	0	3	3	2	2	2	1	2	1	2	2	1	2	3	3	3	2	2	3	2	2	5	4	5	5	6
1.19	2	27	367	1	1	4	2	1	5	1	1	1	1	2	4	4	2	4	4	1	0	0	1	0	4	3	3	2	2	1	3	5	2	3	1	1	6	6	2	2	2	1	1	6	2	2	2	2	3
1.105	2	46	3790	2	1	2	2	1	1	1	2	5	2	1	3	4	2	3	4	2	0	0	1	0	3	4	5	4	2	2	4	4	6	6	6	6	6	6	2	2	2	2	2	6	4	3	4	4	4
0.983333	2	54	3025	3	1	4	2	4	1	2	1	2	2	2	4	4	4	4	5	2	0	0	1	0	3	3	4	2	4	2	3	5	3	2	2	4	4	1	2	4	2	3	3	2	5	5	3	3	6
1.105	2	37	2334	2	1	4	2	2	5	2	1	2	2	2	3	3	3	3	4	2	0	0	1	0	3	3	4	3	3	3	3	3	4	3	3	2	3	2	2	3	2	4	2	2	4	5	4	4	4
1.12826	2	28	4330	1	2	4	2	1	5	1	1	1	3	2	5	2	3	3	2	2	0	0	1	0	2	3	4	3	4	3	3	4	2	3	3	2	2	2	2	3	2	2	4	3	4	5	5	3	5
1.09369	1	24	5254	1	2	3	1	2	3	2	4	3	2	2	6	3	2	4	4	1	1	0	0	0	4	2	1	4	5	4	2	4	1	3	3	4	2	1	3	3	2	1	4	5	5	4	5	3	5
1.06893	1	20	2000	1	1	3	3	2	1	1	1	1	3	2	4	2	2	2	1	1	0	0	1	0	2	1	4	3	3	1	2	5	2	1	2	4	1	5	1	3	1	2	4	2	5	5	5	7	7
1.09369	1	23	7027	1	2	4	2	1	5	2	2	2	2	2	3	3	2	2	2	1	0	1	0	0	2	2	4	3	2	2	2	4	2	3	2	2	2	3	2	2	2	2	4	6	8	8	8	8	8
1.06893	1	25	2456	1	1	4	1	1	2	2	2	2	3	3	2	3	4	3	4	1	0	1	0	0	3	4	1	2	4	5	3	1	2	4	3	3	3	4	4	5	4	3	4	4	3	4	3	4	3
0.827273	1	63	6700	3	2	2	2	2	2	1	1	3	1	1	2	4	3	3	3	1	0	0	1	0	4	3	4	3	3	3	3	4	4	3	4	3	2	2	4	3	3	2	3	3	5	6	4	4	5
1.06893	1	18	2819	1	1	2	1	4	5	5	3	5	4	4	7	2	2	3	3	2	0	0	0	1	2	5	4	3	4	1	6	6	3	4	3	2	2	3	4	6	4	3	6	4	4	8	4	5	3
1.06893	1	25	178	1	1	3	2	2	2	1	1	3	1	3	4	3	1	1	1	2	0	0	1	0	2	2	5	3	1	1	1	1	2	2	2	2	2	2	1	4	1	1	4	2	7	5	7	7	7
1.19	2	30	1989	1	1	5	1	3	2	1	2	3	2	1	1	2	1	1	3	1	1	0	0	0	2	2	3	1	2	1	2	2	1	2	1	2	1	2	2	1	1	3	2	2	5	6	5	5	6
1.12826	2	20	6265	1	2	2	2	1	1	1	1	1	1	1	4	4	1	3	3	2	0	0	1	0	3	4	4	2	1	1	1	1	1	1	1	2	1	3	1	3	1	1	3	1	7	6	5	7	6
1.19	2	25	468	1	1	4	2	1	5	2	2	2	5	2	4	4	3	2	2	1	0	0	1	0	2	2	5	4	4	4	3	4	2	2	3	3	6	6	2	4	2	4	4	6	4	4	4	5	5
1.105	2	35	1400	2	1	5	2	1	2	2	1	2	1	2	4	3	2	2	2	1	0	1	0	0	2	4	3	2	2	1	3	4	1	1	2	2	2	3	2	2	2	2	2	2	5	6	4	4	6
0	2	32	#NULL!	1	#NULL!	4	2	4	1	1	1	1	1	1	4	6	5	5	3	1	0	0	1	0	3	2	5	6	5	3	4	5	5	4	2	1	2	6	6	4	2	3	2	4	2	3	8	7	5
1.06893	1	29	50	1	1	5	1	1	5	1	1	2	2	1	4	3	1	2	3	1	0	1	0	0	1	2	3	3	2	1	1	2	3	1	1	1	2	2	2	3	1	1	1	3	7	7	5	4	7
1.09369	1	33	6531	1	2	5	1	1	2	1	1	1	1	1	1	1	1	1	2	1	1	1	0	0	1	2	1	2	1	1	2	1	1	2	1	2	1	2	1	1	2	2	1	1	5	4	5	4	5
1.19	2	25	3211	1	1	2	1	2	1	1	1	1	1	1	4	2	1	1	1	1	0	1	0	0	1	4	3	3	1	1	1	1	3	2	2	3	1	3	1	3	1	1	2	2	6	6	5	5	4
1.09369	1	32	9586	1	2	5	1	3	3	2	2	2	2	2	2	2	2	2	2	1	1	0	0	0	2	2	2	2	2	2	2	2	2	2	2	2	2	2	2	2	2	2	2	2	5	6	1	3	4
1.09369	1	34	7620	1	2	5	1	1	2	2	2	1	1	1	1	1	1	2	1	1	1	1	0	0	1	2	1	2	2	1	2	1	1	2	1	2	1	2	2	1	1	1	2	1	5	4	5	4	5
1.12826	2	24	5041	1	2	4	2	2	1	1	2	1	1	3	4	3	2	2	3	1	0	1	0	0	1	2	4	2	3	2	2	3	1	2	2	1	2	2	2	3	2	4	4	3	5	3	5	3	4
1.12826	2	21	9600	1	2	4	1	3	2	1	2	1	2	1	2	2	2	2	2	1	1	0	0	0	2	2	2	2	2	1	2	2	2	1	1	2	1	2	1	1	2	2	2	2	5	6	6	6	5
1.09369	1	30	5516	1	2	5	1	1	2	1	1	2	1	2	1	1	1	2	1	1	1	1	0	0	1	2	1	2	1	2	1	2	1	2	1	2	1	2	1	1	2	1	2	1	4	4	5	5	5
1.12826	2	23	7050	1	2	4	2	1	5	2	2	2	2	2	3	3	2	2	2	2	0	0	0	1	4	3	4	3	2	3	3	3	3	3	3	4	4	2	2	3	4	3	3	3	5	4	4	4	5
1.19	2	30	3182	1	1	3	2	1	1	1	1	1	1	1	1	3	2	2	2	2	0	0	1	0	3	3	3	2	3	3	3	2	3	4	3	2	4	4	3	4	4	3	4	3	4	4	4	5	5
1.12826	2	27	9024	1	2	2	2	1	3	2	1	2	2	5	3	4	5	5	5	2	0	0	1	0	5	5	5	5	3	5	3	5	5	6	5	1	6	6	4	5	5	5	1	6	1	1	1	1	1
1.19	2	23	2365	1	1	5	3	2	6	4	5	4	5	4	7	5	6	5	3	2	0	0	0	1	2	6	6	4	5	6	3	1	6	6	6	6	6	2	4	2	5	1	6	4	8	8	8	8	8
1.09369	1	20	4099	1	2	4	1	1	2	2	5	3	3	4	3	3	2	3	2	2	0	1	0	0	3	1	4	3	3	3	2	6	2	2	4	3	6	2	3	3	5	4	2	3	3	1	1	7	1
1.09369	1	20	4321	1	2	3	1	2	5	1	3	4	4	3	1	3	2	4	3	1	1	1	0	0	2	3	2	1	2	2	4	5	3	4	2	1	3	2	2	3	1	3	2	3	5	4	3	4	6
1.06893	1	24	1555	1	1	3	1	1	2	2	1	1	2	2	4	3	3	1	2	2	0	0	1	0	2	3	3	2	2	4	3	1	2	2	1	3	1	2	2	2	4	2	2	2	7	5	3	7	6
1.06893	1	32	656	1	1	5	1	1	2	1	1	2	2	1	1	1	1	2	1	1	1	1	0	0	2	1	2	1	2	2	1	1	1	2	1	2	1	1	1	1	2	2	1	1	4	4	6	5	5
1.19483	1	36	1281	2	1	4	3	3	2	3	1	5	1	2	4	4	4	5	2	2	0	1	0	0	2	3	1	1	2	1	5	3	4	4	2	2	1	1	3	3	1	1	1	5	5	5	3	5	4
1.06893	1	18	1416	1	1	2	1	2	2	2	2	2	2	3	4	1	2	3	2	1	0	1	0	0	2	3	2	1	2	3	2	3	3	2	4	2	3	1	2	4	2	1	3	3	5	7	8	6	3
1.09369	1	19	4625	1	2	5	1	1	4	3	2	2	1	1	1	1	1	2	4	1	1	0	0	0	5	5	4	5	2	1	1	1	1	4	4	3	4	5	2	2	4	3	3	3	7	7	4	6	7
1.09369	1	30	7320	1	2	5	1	3	3	2	2	2	2	2	2	2	2	2	2	1	1	0	0	0	2	2	2	2	3	3	3	3	3	3	3	3	3	3	3	3	3	3	3	2	5	5	5	4	4
1.18171	1	39	4014	2	2	5	2	1	1	2	2	2	2	3	3	2	3	3	2	1	1	0	0	0	2	3	2	3	3	2	2	2	1	2	2	2	2	2	2	2	2	2	2	3	4	4	4	4	4
1.18171	1	46	9027	2	2	4	2	2	3	2	3	3	3	3	7	3	3	3	3	2	0	0	0	1	4	3	3	3	3	4	3	3	3	3	3	3	3	3	4	3	4	3	3	3	8	8	8	8	8
1.09369	1	20	5545	1	2	1	2	5	5	1	5	2	2	3	7	3	6	6	2	2	0	0	1	0	5	5	2	4	3	3	4	2	3	6	6	6	4	5	5	6	6	6	6	5	1	6	1	3	4
1.09369	1	20	5650	1	2	4	1	2	3	1	1	1	1	1	3	2	3	3	3	1	1	0	0	0	3	3	3	3	3	3	3	2	3	2	2	2	2	1	4	2	3	2	3	2	5	5	5	5	5
1.09369	1	29	7514	1	2	5	1	1	2	2	1	2	1	1	1	1	1	2	1	1	1	1	0	0	2	1	1	2	2	1	2	1	1	2	1	2	2	1	1	2	1	2	1	1	5	4	6	5	5
1.19483	1	47	3275	2	1	4	1	1	2	1	1	1	2	2	4	3	2	2	1	2	0	1	0	0	2	2	3	4	1	2	2	2	3	2	3	2	2	3	2	2	2	1	2	2	5	5	5	4	6
1.18171	1	37	6419	2	2	2	2	1	3	1	1	2	1	1	3	3	3	3	3	1	0	0	1	0	2	2	5	3	3	3	3	5	3	3	2	2	2	2	2	2	3	1	1	3	4	4	3	7	5
1.18171	1	35	6006	2	2	5	1	1	2	2	1	1	2	1	1	1	1	2	1	1	1	1	0	0	1	2	1	2	2	2	1	1	1	2	1	2	1	2	1	1	1	2	2	1	5	5	4	6	5
1.18171	1	41	4626	2	2	4	3	3	3	2	2	3	2	5	6	4	5	5	5	2	0	0	1	0	5	5	5	5	4	3	3	5	6	6	5	6	5	6	6	4	6	4	2	6	3	3	2	4	4
1.19483	1	35	1407	2	1	4	1	2	3	2	2	2	2	3	2	2	2	3	2	1	1	0	0	0	3	2	3	2	2	2	3	3	3	2	2	3	2	3	3	3	3	2	4	2	6	4	5	4	5
1.06893	1	34	3535	1	1	5	1	1	2	1	2	2	1	1	1	1	1	2	1	1	1	1	0	0	2	1	1	2	2	1	2	1	1	2	1	2	1	1	1	1	1	2	2	1	5	5	4	5	4
1.18171	1	39	4014	2	2	1	1	1	1	1	2	1	2	1	1	1	1	1	1	1	1	1	0	0	1	1	2	2	1	2	2	1	1	2	1	2	1	2	2	1	2	1	1	1	6	7	7	6	7
1.19483	1	37	3045	2	1	5	1	1	2	2	1	1	1	2	1	1	1	2	1	1	1	1	0	0	1	2	1	2	1	2	2	1	1	2	1	2	1	2	2	1	1	1	2	1	5	5	5	4	6
1.18171	1	43	5099	2	2	4	2	1	1	1	2	3	2	1	2	3	3	4	5	1	0	0	1	0	2	2	3	2	4	2	3	5	2	2	3	2	3	3	3	4	1	2	2	2	2	4	5	2	1
1.19483	1	39	2335	2	1	1	1	1	1	1	1	1	2	2	1	1	1	2	1	1	1	1	0	0	1	2	2	1	1	2	1	1	1	2	1	2	1	2	2	1	2	1	1	1	7	7	7	6	6
1.18171	1	35	4715	2	2	5	1	4	3	1	1	2	2	2	2	2	1	2	1	1	1	0	0	0	2	2	1	1	2	1	1	2	1	2	1	2	1	2	1	2	1	2	1	1	4	5	4	5	6
1.18171	1	38	5416	2	2	5	1	1	2	1	2	2	1	1	1	1	1	2	1	1	1	1	0	0	2	2	1	1	2	1	1	2	1	2	1	2	1	2	2	1	1	2	1	1	4	4	6	5	5
1.12826	2	32	5412	1	2	4	2	1	5	2	2	2	3	3	3	4	4	3	4	2	0	0	1	0	3	3	5	3	6	3	6	6	4	4	4	6	4	4	3	4	3	3	3	6	4	5	4	4	4
1.18171	1	44	5353	2	2	2	2	1	5	2	2	2	5	5	3	4	5	5	5	1	1	1	0	0	5	5	5	5	5	5	5	5	5	5	5	6	5	1	5	6	5	5	1	6	1	1	8	1	1
1.19483	1	43	986	2	1	3	2	1	5	2	2	2	2	2	4	4	3	3	2	1	0	1	0	0	2	2	3	3	4	4	3	3	3	2	3	3	4	2	3	3	2	2	4	4	4	5	5	4	5
1.18171	1	43	4790	2	2	3	1	1	1	1	2	2	2	3	3	3	2	3	4	1	0	1	0	0	2	2	5	4	3	2	2	5	2	1	2	1	4	2	1	2	1	2	4	3	5	4	5	4	4
1.19483	1	41	2740	2	1	3	2	1	2	1	1	1	2	2	4	3	3	2	3	2	0	0	1	0	3	4	3	4	5	5	4	5	4	3	1	4	3	3	2	2	1	2	1	2	5	6	5	5	6
1.09369	1	22	9600	1	2	4	1	2	3	2	1	1	2	2	3	2	2	1	2	1	1	0	0	0	2	2	2	2	2	2	2	1	2	1	1	2	2	1	2	1	1	2	2	2	5	5	6	6	6
1.19483	1	35	3208	2	1	3	2	2	4	2	1	3	3	3	7	5	6	6	6	2	0	0	0	1	6	6	6	6	4	5	4	5	6	6	6	6	6	6	6	6	6	6	6	6	8	8	8	8	8
1.12826	2	32	4050	1	2	4	2	2	1	2	5	1	2	5	4	2	3	2	2	2	0	0	1	0	2	4	6	4	2	1	2	4	2	2	2	1	1	2	1	1	2	2	1	2	6	6	5	4	4
0.983333	2	70	3150	3	1	4	2	2	1	1	2	2	1	2	4	4	3	3	3	1	0	0	1	0	2	2	4	4	5	2	4	5	3	2	2	3	2	4	1	4	2	4	3	3	4	4	8	3	5
1.105	2	39	575	2	1	4	2	1	5	1	1	1	2	2	3	2	2	1	2	1	0	0	1	0	2	2	2	1	3	3	3	2	3	1	2	2	1	2	1	3	2	3	3	2	6	5	5	5	6
1.18171	1	41	6421	2	2	4	2	1	1	2	2	3	2	2	4	4	3	3	3	1	1	0	0	0	3	3	3	3	3	3	3	3	3	3	3	3	3	3	3	3	3	3	3	3	3	4	3	3	5
1.18171	1	35	6413	2	2	3	2	1	5	2	1	2	3	2	4	4	3	3	3	2	0	0	1	0	3	3	3	3	3	3	3	3	3	3	3	3	2	4	3	2	3	3	3	3	5	4	5	4	4
		48.7833
				2.23133
[truncated: 21 more columns]
